# Supplementary material for: Focal Adhesion Kinase Provides a Collateral Vulnerability That Can Be Leveraged to Improve mTORC1 Inhibitor Efficacy
Source: Cancers (Basel). 2022 Jul 11;14(14):3374. doi: 10.3390/cancers14143374 (PMC9323520; doi:10.3390/cancers14143374)
Supplement: Supplementary file 1 [file cancers-14-03374-s001.zip]

Archive with 15 entries (15 files):
- cancers-1779871-Supplementary Figures .pdf
- Supplementary Figure S1.tiff
- Supplementary Figure S2.tiff
- Supplementary Figure S3.tiff
- Supplementary Figure S4.tiff
- Supplementary Figure S5.tiff
- Supplementary Figure S6.tiff
- Supplementary Figure S7.tiff
- Supplementary Figure S8.tiff
- Supplementary Table S1.xlsx
- Supplementary Table S2.xlsx
- Supplementary Table S3.xlsx
- Supplementary Table S4.xlsx
- Supplementary Table S5.xlsx
- Supplementary Table S6.xlsx
