# Supplementary material for: Focal Adhesion Kinase Provides a Collateral Vulnerability That Can Be Leveraged to Improve mTORC1 Inhibitor Efficacy
Source: Cancers (Basel). 2022 Jul 11;14(14):3374. doi: 10.3390/cancers14143374 (PMC9323520; doi:10.3390/cancers14143374)
Supplement: Supplementary file 1 [file cancers-14-03374-s001.zip › Supplementary Table S1.xlsx]

## Sheet: Sheet 1
		Normalized Counts
Gene symbol	Gene name	MB_Veh1	MB_Veh2	MB_Veh4	MB_Rap1	MB_Rap2	MB_Rap4	Chromosome	Start	Stop	Strand	Total counts	Maximum counts	Geometric mean	Arithmetic mean	Gene biotype	Gene id	Gene source	Gene version	DESeq2 Akaike Weight 1	P-value (Rapamycin vs. Vehicle)	FDR step up (Rapamycin vs. Vehicle)	Ratio (Rapamycin vs. Vehicle)	Log2(Ratio) (Rapamycin vs. Vehicle)	Fold change (Rapamycin vs. Vehicle)	LSMean(Rapamycin) (Rapamycin vs. Vehicle)	LSMean(Vehicle) (Rapamycin vs. Vehicle)	FC 95% lower limit (Rapamycin vs. Vehicle)	FC 95% upper limit (Rapamycin vs. Vehicle)	P-value (Drug Txt)	FDR step up (Drug Txt)
A4GALT	A4GALT	253.174	263.91	266.708	323.345	290.209	496.901	22	42692121	42721299	-	1894.25	496.901	306.615	315.708	protein_coding	ENSG00000128274	ensembl_havana	17	1	0.051511	0.35973	1.41816	0.504018	1.41816	370.448	261.218	-1.00229	2.01578	0.0515082	0.359711
AADACP1	AADACP1	52.5455	8.88585	19.805	13.0206	12.8574	6.85382	3	151770428	151784895	+	113.968	52.5455	14.8236	18.9947	transcribed_unprocessed_pseudogene	ENSG00000240602	havana	7	1	0.103083	0.487383	0.400987	-1.31837	-2.49384	10.8734	27.1166	-7.48261	1.20313	0.103079	0.487369
AASDHPPT	AASDHPPT	1334.66	1303.55	1333.54	1608.06	1583.31	1500.13	11	106075501	106098700	+	8663.24	1608.06	1438.52	1443.87	protein_coding	ENSG00000149313	ensembl_havana	11	1	0.0463902	0.341388	1.18115	0.240187	1.18115	1563.6	1323.8	1.00267	1.3914	0.0463875	0.341368
ABCB9	ABCB9	438.317	336.282	336.983	514.972	556.52	652.975	12	122920951	122981650	-	2836.05	652.975	458.54	472.675	protein_coding	ENSG00000150967	ensembl_havana	18	1	0.00180555	0.0581265	1.55095	0.633151	1.55095	575.117	370.816	1.1773	2.04319	0.00180504	0.05811
ABCC3	ABCC3	242.665	312.782	377.616	339.621	396.742	924.412	17	50634777	50692254	+	2593.84	924.412	390.941	432.306	protein_coding	ENSG00000108846	ensembl_havana	16	1	0.0306399	0.280764	1.78235	0.833781	1.78235	553.923	310.782	1.05542	3.00996	0.0306376	0.280743
ABCC5	ABCC5	826.398	801.505	907.07	566.396	631.848	765.914	3	183919934	184017940	-	4499.13	907.07	740.358	749.855	protein_coding	ENSG00000114770	ensembl_havana	17	1	0.040702	0.320748	0.775785	-0.366272	-1.28902	655.192	844.554	-1.64381	-1.0108	0.0406994	0.320727
ABCC9	ABCC9	9.55373	10.663	15.844	2.1701	3.67354	2.57018	12	21797401	21942530	-	44.4746	15.844	5.66554	7.41244	protein_coding	ENSG00000069431	ensembl_havana	11	1	0.0273636	0.265787	0.235958	-2.0834	-4.23804	2.81781	11.942	-15.2865	-1.17496	0.0273614	0.265765
ABCF1	ABCF1	2944.45	2644.45	2673.64	2214.59	2442.88	2380.83	6	30571393	30597180	+	15300.8	2944.45	2539.38	2550.14	protein_coding	ENSG00000204574	ensembl_havana	13	1	0.0672831	0.402472	0.851869	-0.231297	-1.17389	2346.4	2754.41	-1.39383	1.01147	0.0672801	0.402454
ABCF2	ABCF2	1412.99	1372.87	1289.97	1970.45	1831.26	1494.13	7	151207837	151227206	-	9371.66	1970.45	1542.91	1561.94	protein_coding	ENSG00000033050 | ENSG00000285292	ensembl_havana	1 | 9	1	0.0197444	0.226409	1.29863	0.376994	1.29863	1764.77	1358.94	1.04249	1.61771	0.0197424	0.226386
ABHD10	ABHD10	487.241	538.482	454.195	555.546	612.563	614.274	3	111979010	111993369	+	3262.3	614.274	540.42	543.717	protein_coding	ENSG00000144827	ensembl_havana	9	1	0.0972129	0.475902	1.20336	0.267072	1.20336	594.36	493.916	-1.03422	1.49764	0.0972097	0.475886
ABHD14A	ABHD14A	324.678	365.77	310.28	603.343	573.388	271.53	3	51971426	51981200	+	2448.99	603.343	388.932	408.165	protein_coding	ENSG00000248487	ensembl_havana	9	1	0.0902406	0.459586	1.44559	0.53166	1.44559	482.429	333.724	-1.05953	2.21414	0.0902375	0.45957
ABHD5	ABHD5	1196.13	1059.19	1102.48	908.188	1026.75	887.573	3	43690108	43734372	+	6180.31	1196.13	1024.46	1030.05	protein_coding	ENSG00000011198	ensembl_havana	10	1	0.0862082	0.449171	0.840598	-0.250512	-1.18963	940.886	1119.31	-1.45063	1.02502	0.0862051	0.449155
ABHD6	ABHD6	214.959	264.798	289.154	364.578	360.926	368.393	3	58237532	58295694	+	1862.81	368.393	304.546	310.468	protein_coding	ENSG00000163686	ensembl_havana	15	1	0.0093946	0.149522	1.4255	0.511467	1.4255	364.64	255.798	1.0909	1.86273	0.00939323	0.1495
ABI3BP	ABI3BP	124.198	87.0814	100.346	28.2113	70.7157	24.8451	3	100749156	100993516	-	435.398	124.198	61.4403	72.5663	protein_coding	ENSG00000154175	ensembl_havana	17	1	0.00531066	0.107593	0.397679	-1.33032	-2.51459	41.3101	103.878	-4.8088	-1.31491	0.00530965	0.107573
ABL2	ABL2	2487.8	2269.45	2781.96	1754.52	1980.96	2412.56	1	179099330	179229685	-	13687.3	2781.96	2255.62	2281.21	protein_coding	ENSG00000143322	ensembl_havana	21	1	0.0986966	0.479184	0.815895	-0.293545	-1.22565	2049.86	2512.4	-1.56047	1.03878	0.0986934	0.479168
ABRACL	ABRACL	221.647	366.097	336.686	383.023	540.929	424.937	6	139028745	139043303	+	2273.32	540.929	366.04	378.886	protein_coding	ENSG00000146386	ensembl_havana	8	1	0.0369877	0.309104	1.46028	0.546246	1.46028	449.774	308.005	1.02312	2.08422	0.0369852	0.309083
ABRAXAS1	ABRAXAS1	506.985	498.807	475.435	738.03	703.481	602.793	4	83459517	83523349	-	3525.53	738.03	578.876	587.589	protein_coding	ENSG00000163322	ensembl_havana	14	1	0.00434612	0.0954461	1.37871	0.463323	1.37871	681.061	493.983	1.10566	1.7192	0.00434522	0.0954265
AC000089.1	AC000089.1	21.8391	17.2505	27.8567	49.2026	37.4968	40.9632	22	19792294	19793095	+	194.609	49.2026	30.4245	32.4348	processed_pseudogene	ENSG00000235776	havana	2	1	0.0402584	0.319921	1.92201	0.942619	1.92201	42.4874	22.1057	1.02945	3.58844	0.0402558	0.319901
AC003102.1	AC003102.1	23.8843	19.5489	25.0864	3.25515	3.67354	4.28364	17	44221401	44223711	+	79.7319	25.0864	9.18383	13.2887	lncRNA	ENSG00000260793	havana	2	1	0.000461899	0.0250132	0.164876	-2.60055	-6.06516	3.75732	22.7887	-16.6332	-2.21162	0.000461697	0.0250023
AC004057.1	AC004057.1	1280.85	1239.19	1462.54	1787.64	1725.95	3695.52	4	113214046	113217171	-	11191.7	3695.52	1726.32	1865.28	transcribed_processed_pseudogene	ENSG00000196656	havana	7	1	0.00424539	0.0942077	1.81075	0.856585	1.81075	2403.43	1327.31	1.20533	2.72024	0.00424451	0.0941882
AC004148.1	AC004148.1	72.8473	76.0187	69.7907	32.7442	38.106	63.411	17	5425139	5432877	-	352.918	76.0187	55.9205	58.8196	lncRNA	ENSG00000263272	havana	1	1	0.0759787	0.426781	0.616337	-0.698208	-1.62249	44.9565	72.9414	-2.76904	1.05188	0.0759756	0.426764
AC004233.2	AC004233.2	22.929	7.10868	10.5627	5.42525	2.75516	3.42691	16	3006120	3007389	+	52.2076	22.929	6.67169	8.70127	lncRNA	ENSG00000272079	havana	2	1	0.0534275	0.363992	0.282859	-1.82184	-3.53533	3.83576	13.5606	-12.7337	1.01882	0.0534247	0.363973
AC004263.2	AC004263.2	102.255	99.5215	150.518	32.5724	75.3328	66.8248	12	120218070	120222669	+	527.025	150.518	79.4316	87.8375	lncRNA	ENSG00000286067	havana	1	1	0.013423	0.184506	0.499256	-1.00215	-2.00298	58.4656	117.106	-3.47401	-1.15484	0.0134213	0.184484
AC004453.1	AC004453.1	349.76	384.451	401.973	446.777	556.34	821.561	7	44467897	44468305	+	2960.86	821.561	471.86	493.477	processed_pseudogene	ENSG00000146677	havana	7	1	0.00799644	0.137714	1.60781	0.685093	1.60781	608.688	378.583	1.13196	2.28369	0.00799517	0.137692
AC004687.2	AC004687.2	0.253962	0.00911454	0.0540646	2.50901	0.19504	9.01927	17	58345206	58417596	-	12.0405	9.01927	0.286441	2.00674	protein_coding	ENSG00000285897	havana	1	1	0.0877532	0.453383	16.6174	4.05462	16.6174	3.92241	0.236042	-1.51557	418.508	0.0877501	0.453367
AC004817.3	AC004817.3	35.3488	32.8777	39.6101	13.0206	15.6126	10.2807	14	71141125	71143254	-	146.75	39.6101	21.406	24.4584	lncRNA	ENSG00000269927	havana	1	1	0.00438066	0.09571	0.361085	-1.46959	-2.76943	12.9494	35.8625	-5.58071	-1.37433	0.00437976	0.0956905
AC004890.2	AC004890.2	55.0605	41.0623	37.0355	23.8739	31.0631	8.63093	7	149285281	149297313	+	196.726	55.0605	28.5006	32.7877	transcribed_unprocessed_pseudogene	ENSG00000244560	havana	7	1	0.0636648	0.39355	0.474815	-1.07456	-2.10608	21.1123	44.4642	-4.62748	1.04326	0.0636618	0.393532
AC004967.2	AC004967.2	17.1994	12.4743	4.52961e-14	35.9913	31.5294	19.4593	7	97966377	97970405	-	116.654	35.9913	0.0773758	19.4423	lncRNA	ENSG00000285725	havana	1	1	0.0982483	0.478343	2.87278	1.52245	2.87278	28.9583	10.0802	-1.21612	10.0364	0.0982452	0.478328
AC005000.1	AC005000.1	108.585	96.1154	98.4483	123.02	160.395	189.098	X	115718942	115719230	-	775.662	189.098	125.104	129.277	processed_pseudogene	ENSG00000228532	havana	4	1	0.0206427	0.231044	1.56117	0.642629	1.56117	157.807	101.083	1.07061	2.27652	0.0206407	0.231021
AC005070.3	AC005070.3	16.2413	6.2201	10.5627	4.3402	0.918386	3.42691	7	105102838	105105484	-	41.7096	16.2413	4.94241	6.9516	lncRNA	ENSG00000272918	havana	1	1	0.0647429	0.395864	0.260904	-1.93841	-3.83283	2.87002	11.0003	-15.9485	1.08562	0.06474	0.395845
AC005077.4	AC005077.4	172.923	85.3042	166.362	39.0618	49.5928	35.1258	7	76071469	76074964	-	548.37	172.923	74.2072	91.3949	processed_pseudogene	ENSG00000230882	havana	1	1	5.85986e-06	0.000948628	0.292122	-1.77536	-3.42323	41.2582	141.236	-5.8289	-2.01041	5.8531e-06	0.000947533
AC005224.3	AC005224.3	85.0282	119.959	132.034	60.7628	49.5928	92.5266	17	14303854	14305506	+	539.903	132.034	84.9377	89.9838	lncRNA	ENSG00000266709	havana	1	1	0.0490595	0.351079	0.604252	-0.726779	-1.65494	67.7591	112.137	-2.73315	-1.00208	0.0490567	0.351059
AC005253.1	AC005253.1	119.624	150.434	134.732	97.123	63.7381	69.4458	19	18557775	18561561	-	635.097	150.434	100.693	105.849	lncRNA	ENSG00000268030	havana	1	1	0.00633346	0.119485	0.566943	-0.818725	-1.76385	76.523	134.975	-2.65095	-1.1736	0.00633235	0.119464
AC005332.3	AC005332.3	9.55373	1.77717	2.64067	8.6804	8.26547	30.8422	17	68131462	68131908	+	61.7597	30.8422	6.80396	10.2933	lncRNA	ENSG00000274561	havana	1	1	0.0903425	0.459586	3.40396	1.76721	3.40396	15.9924	4.69819	-1.21247	14.0488	0.0903394	0.45957
AC005393.1	AC005393.1	0	0.888585	0	4.3402	2.75516	11.1375	19	39812972	39813556	-	19.1214	11.1375	0	3.1869	lncRNA	ENSG00000276445	havana	1	1	0.0310713	0.28136	16.3859	4.03439	16.3859	6.09817	0.372159	1.28976	208.177	0.031069	0.281339
AC005520.3	AC005520.3	9.87176	8.5709	16.6527	33.5769	24.7612	14.967	14	73851971	73932279	+	108.4	33.5769	16.1179	18.0667	protein_coding	ENSG00000258653	havana	3	1	0.101379	0.483826	2.11031	1.07746	2.11031	24.3346	11.5313	-1.15799	5.15703	0.101376	0.483811
AC005540.1	AC005540.1	1.57674e-12	1.81532	0.00269291	7.91011	14.088	5.1995e-27	2	190880797	190882060	-	23.8161	14.088	4.05809e-07	3.96935	lncRNA	ENSG00000235852	havana	1	1	0.103993	0.489472	11.3436	3.5038	11.3436	7.32306	0.645571	-1.6474	211.981	0.10399	0.489457
AC005586.2	AC005586.2	4.77687	5.33151	1.32034	13.0206	8.26547	28.272	7	150337483	150343347	+	60.9868	28.272	6.83894	10.1645	lncRNA	ENSG00000261305	havana	2	1	0.0294785	0.275201	4.22899	2.08031	4.22899	16.567	3.91749	1.15463	15.4893	0.0294762	0.27518
AC005832.4	AC005832.4	12.0977	27.2656	11.7501	9.7204e-09	8.24477	0.0237309	12	4604944	4662644	+	59.382	27.2656	0.139505	9.897	protein_coding	ENSG00000272921	havana	1	1	0.0572277	0.375437	0.162656	-2.6201	-6.14793	2.77804	17.0792	-39.9649	1.05736	0.0572248	0.375418
AC005833.1	AC005833.1	53.2509	27.5861	36.3763	31.9241	79.8341	160.989	12	4649101	4774185	+	389.961	160.989	52.9042	64.9935	protein_coding	ENSG00000255639	havana	3	1	0.0406191	0.320748	2.33192	1.22152	2.33192	91.124	39.0769	1.03682	5.24472	0.0406165	0.320727
AC006001.3	AC006001.3	277.6	334.652	348.311	221.361	222.139	223.243	7	66526088	66592398	-	1627.3	348.311	266.122	271.217	transcribed_unprocessed_pseudogene	ENSG00000229180	havana	7	1	0.00700889	0.125702	0.694916	-0.525089	-1.43902	222.259	319.835	-1.87483	-1.10452	0.00700772	0.125681
AC006001.4	AC006001.4	5.27297	8.20132	4.01941	17.1867	21.4906	17.8692	7	66553805	66554200	-	74.0402	21.4906	10.2315	12.34	processed_pseudogene	ENSG00000275400	havana	1	1	0.0226133	0.241143	3.18026	1.66914	3.18026	18.8603	5.93045	1.17628	8.59828	0.0226112	0.24112
AC006027.1	AC006027.1	9.04315	17.6345	0.0906207	0.0430877	3.33236e-13	3.63691e-09	7	30424672	30425413	+	26.8114	17.6345	0.000301734	4.46856	lncRNA	ENSG00000272638	havana	1	1	0.00999535	0.153961	0.0199565	-5.647	-50.109	0.179178	8.97842	-984.696	-2.54994	0.00999393	0.153939
AC006058.1	AC006058.1	871.777	796.172	1280.73	812.703	384.804	807.895	3	44117299	44122366	+	4954.08	1280.73	779.649	825.679	lncRNA	ENSG00000261786	havana	1	1	0.0831172	0.441807	0.680382	-0.555583	-1.46976	668.364	982.336	-2.27202	1.05176	0.0831141	0.441791
AC006058.4	AC006058.4	289.002	286.124	410.624	297.304	133.166	225.319	3	44115818	44117488	-	1641.54	410.624	259.149	273.59	TEC	ENSG00000280435	havana	1	1	0.0749337	0.424046	0.665388	-0.587732	-1.50288	218.353	328.158	-2.35311	1.04182	0.0749306	0.424029
AC006128.1	AC006128.1	88.3433	65.22	84.3883	54.7103	36.7611	29.9826	19	15398696	15400357	+	359.406	88.3433	55.5299	59.9009	TEC	ENSG00000279716	havana	1	1	0.0123219	0.17487	0.508418	-0.975912	-1.96688	40.2692	79.2049	-3.34071	-1.15803	0.0123203	0.174848
AC006254.1	AC006254.1	38.3285	35.969	57.9213	27.2403	19.633	20.1965	3	52813282	52835730	-	199.289	57.9213	30.8527	33.2148	protein_coding	ENSG00000243696	havana	5	1	0.0378953	0.311482	0.508607	-0.975377	-1.96616	22.2739	43.794	-3.72242	-1.03851	0.0378927	0.311461
AC006333.1	AC006333.1	75.4745	80.8613	91.1032	66.1881	57.8583	27.4153	7	123749068	123751167	+	398.901	91.1032	62.2829	66.4834	lncRNA	ENSG00000272686	havana	1	1	0.0884987	0.455114	0.61039	-0.712197	-1.6383	50.2803	82.374	-2.89122	1.0772	0.0884956	0.455098
AC006453.3	AC006453.3	327.51	294.19	289.969	312.296	395.258	467.349	2	89542842	89585653	-	2086.57	467.349	342.412	347.762	transcribed_unprocessed_pseudogene	ENSG00000283196	havana	2	1	0.0941356	0.468695	1.28963	0.366954	1.28963	392.079	304.025	-1.04441	1.737	0.0941325	0.46868
AC006486.2	AC006486.2	7.64298	16.8831	2.64067	1.08505	0.918386	4.28364	19	42242775	42244974	+	33.4539	16.8831	3.36604	5.57564	TEC	ENSG00000279539	havana	1	1	0.0992165	0.479796	0.232711	-2.10339	-4.29717	2.13118	9.15804	-24.3178	1.31692	0.0992134	0.479781
AC006538.2	AC006538.2	12.9026	11.1713	13.6594	26.0258	29.6209	29.437	19	2717769	2740049	-	122.817	29.6209	18.8373	20.4695	protein_coding	ENSG00000267001	havana	1	1	0.0292172	0.274231	2.26676	1.18063	2.26676	28.3896	12.5243	1.08631	4.72995	0.0292148	0.27421
AC007068.1	AC007068.1	417.784	425.858	381.572	526.956	555.62	524.173	12	9695384	9696228	+	2831.96	555.62	467.344	471.994	processed_pseudogene	ENSG00000213443	havana	2	1	0.0120194	0.172542	1.30988	0.389431	1.30988	535.609	408.9	1.06108	1.61701	0.0120179	0.17252
AC007098.1	AC007098.1	25.7951	20.4375	23.766	10.8505	11.0206	2.57018	2	62957326	63048641	-	94.4399	25.7951	12.5196	15.74	lncRNA	ENSG00000231609	havana	7	1	0.0376518	0.311286	0.346089	-1.53078	-2.88943	8.07029	23.3185	-7.8581	-1.06245	0.0376492	0.311265
AC007405.3	AC007405.3	3.68801	4.44293	1.32034	23.042	11.939	5.14037	2	170814686	170818038	-	49.5727	23.042	5.59249	8.26212	lncRNA	ENSG00000235934	havana	2	1	0.0494135	0.352327	4.11147	2.03965	4.11147	13.2926	3.23305	1.00363	16.843	0.0494108	0.352308
AC008038.1	AC008038.1	11555.6	12871.6	12783.4	20129.7	15303.7	13367.8	7	133034607	133035921	-	86011.8	20129.7	14091.6	14335.3	processed_pseudogene	ENSG00000283041	havana	1	1	0.0353281	0.30146	1.31144	0.391155	1.31144	16266.4	12403.4	1.01881	1.68814	0.0353256	0.301438
AC008105.3	AC008105.3	377.299	347.06	436.35	302.819	256.929	133.252	17	45190931	45222223	-	1853.71	436.35	289.801	308.952	lncRNA	ENSG00000267121	havana	6	1	0.0190354	0.221411	0.596516	-0.745367	-1.6764	230.647	386.657	-2.58182	-1.0885	0.0190335	0.221388
AC008264.2	AC008264.2	27.8287	22.1756	17.4944	3.50838	10.1134	5.20847	7	131493964	131497695	-	86.329	27.8287	11.2201	14.3882	lncRNA	ENSG00000273489	havana	1	1	0.0119988	0.172542	0.280017	-1.83642	-3.57122	6.32213	22.5777	-9.64078	-1.32288	0.0119972	0.17252
AC008443.1	AC008443.1	71.0557	52.572	85.1559	32.784	29.9409	56.4932	5	181246507	181272168	+	328.002	85.1559	51.021	54.667	lncRNA	ENSG00000233937	havana	7	1	0.064023	0.394166	0.574988	-0.798396	-1.73917	39.8722	69.3443	-3.12386	1.03278	0.0640201	0.394148
AC008758.3	AC008758.3	1.19311	1.96351e-09	0.454264	14.3357	0.315972	10.2807	19	12379746	12383688	-	26.5798	14.3357	0.0606065	4.42996	transcribed_unprocessed_pseudogene	ENSG00000248406	havana	1	1	0.0371093	0.309878	15.015	3.90834	15.015	8.29014	0.552123	1.17577	191.747	0.0371068	0.309857
AC008763.3	AC008763.3	24.0348	61.1407	20.4742	117.678	82.3119	76.7309	19	7678501	7682855	+	382.37	117.678	53.0784	63.7284	protein_coding	ENSG00000269711	havana	1	1	0.00630222	0.11916	2.59081	1.3734	2.59081	92.1316	35.561	1.30856	5.1295	0.00630111	0.119139
AC008764.8	AC008764.8	38.7004	39.0621	32.3037	16.3452	20.0791	9.84808	19	16572624	16575341	+	156.339	39.0621	23.2471	26.0564	lncRNA	ENSG00000279529	havana	1	1	0.0166284	0.207373	0.41804	-1.25829	-2.39211	15.3732	36.7745	-4.88407	-1.17161	0.0166265	0.20735
AC008771.1	AC008771.1	95.7037	134.447	146.978	158.187	178.46	182.843	5	80411231	80488096	-	896.619	182.843	146.191	149.436	lncRNA	ENSG00000249042	havana_tagene	6	1	0.0793895	0.433139	1.38231	0.467079	1.38231	173.282	125.357	-1.0387	1.98472	0.0793865	0.433122
AC008875.2	AC008875.2	14.3306	3.55434	15.844	4.3402	0.918386	1.71346	5	42995134	42997481	+	40.701	15.844	4.2029	6.7835	lncRNA	ENSG00000286656	havana_tagene	1	1	0.0472169	0.343862	0.203979	-2.29351	-4.90246	2.27679	11.1619	-23.5691	-1.01973	0.0472142	0.343842
AC008878.2	AC008878.2	25.0922	10.8627	14.4296	65.064	26.1999	25.4666	19	7533595	7540060	+	167.115	65.064	23.5536	27.8525	protein_coding	ENSG00000268614	havana	1	1	0.060542	0.38442	2.30366	1.20393	2.30366	38.7504	16.8212	-1.03766	5.50671	0.060539	0.384401
AC008878.3	AC008878.3	10.4932	8.05302	0.762875	0.665578	9.83084	130.672	19	7382834	7470242	+	160.478	130.672	6.16901	26.7463	protein_coding	ENSG00000268861	havana	7	1	0.0346276	0.297964	7.23348	2.85469	7.23348	47.1293	6.51545	1.15378	45.3495	0.0346252	0.297943
AC008969.1	AC008969.1	158.187	171.873	221.85	76.8803	87.7672	168.257	19	58002061	58011233	+	884.814	221.85	137.803	147.469	lncRNA	ENSG00000176593	havana	8	1	0.0476575	0.345389	0.605639	-0.72347	-1.65115	111.251	183.692	-2.71221	-1.00519	0.0476548	0.34537
AC009022.1	AC009022.1	125.466	113.298	114.606	66.634	53.7329	60.2798	16	69976297	70065949	-	534.018	125.466	84.0126	89.0029	lncRNA	ENSG00000196696	havana	13	1	0.00056656	0.0280769	0.510218	-0.970813	-1.95995	60.1208	117.833	-2.87345	-1.33685	0.000566327	0.0280654
AC009090.6	AC009090.6	66.0519	55.4485	54.4163	5.88495	17.5812	41.3628	16	57177349	57181391	+	240.746	66.0519	30.7953	40.1243	lncRNA	ENSG00000285979	havana	1	1	0.0274883	0.266123	0.371521	-1.42849	-2.69164	21.7951	58.6645	-6.49129	-1.1161	0.0274861	0.266101
AC009093.1	AC009093.1	10.5091	6.2201	10.5627	22.7861	11.939	56.544	16	29215385	29221041	-	118.561	56.544	14.8261	19.7602	lncRNA	ENSG00000259807	havana	2	1	0.023671	0.24736	3.37369	1.75433	3.37369	30.5038	9.04167	1.17653	9.67401	0.0236688	0.247338
AC009113.1	AC009113.1	48.724	67.5325	46.2118	31.4665	29.3883	35.9826	16	89215211	89217654	-	259.306	67.5325	41.4337	43.2176	lncRNA	ENSG00000259877	havana	2	1	0.0622253	0.388709	0.594355	-0.750604	-1.6825	32.3103	54.362	-2.90706	1.02694	0.0622224	0.38869
AC009237.14	AC009237.14	452.476	598.644	631.21	352.731	405.41	252.398	2	95525109	95526703	-	2692.87	631.21	428.279	448.812	lncRNA	ENSG00000272913	havana	1	1	0.00309271	0.0776513	0.600701	-0.73528	-1.66472	336.673	560.466	-2.33336	-1.18768	0.00309199	0.0776332
AC009237.3	AC009237.3	502.898	535.191	739.299	374.252	397.26	229.94	2	95525345	95532406	+	2778.84	739.299	435.288	463.14	transcribed_unprocessed_pseudogene	ENSG00000229689	havana	3	1	0.0026599	0.0729809	0.563605	-0.827245	-1.77429	333.579	591.867	-2.57912	-1.22062	0.00265924	0.0729629
AC009245.1	AC009245.1	143.031	203.337	197.513	299.641	260.798	209.886	7	137721985	137722847	+	1314.2	299.641	213.315	219.034	processed_pseudogene	ENSG00000230383	havana	1	1	0.0517666	0.360627	1.41608	0.501899	1.41608	256.497	181.133	-1.00267	2.01062	0.0517638	0.360607
AC009271.2	AC009271.2	0	0	0	0	0.918386	21.3443	18	56026388	56029187	+	22.2627	21.3443	0	3.71044	lncRNA	ENSG00000287248	havana_tagene	1	1	0.0452623	0.337792	38.9574	5.28383	38.9574	7.44379	0.191075	1.08034	1404.82	0.0452596	0.337772
AC009302.1	AC009302.1	9.08928	11.2067	2.76	15.5656	10.7627	37.1169	2	221944223	221944613	+	86.5011	37.1169	10.9756	14.4169	processed_pseudogene	ENSG00000233868	havana	1	1	0.0900096	0.459316	2.70734	1.43688	2.70734	21.2121	7.83503	-1.16819	8.56248	0.0900065	0.4593
AC009303.4	AC009303.4	23.8843	23.1032	40.9304	2.1701	18.3677	6.85382	2	118014174	118015674	+	115.31	40.9304	13.5431	19.2183	TEC	ENSG00000279227	havana	1	1	0.0379248	0.311537	0.315339	-1.66502	-3.17119	9.20271	29.1835	-9.42984	-1.06645	0.0379223	0.311516
AC009318.1	AC009318.1	5.73224	6.2201	9.24235	14.1057	9.18386	81.3891	12	29277955	29317849	-	125.873	81.3891	12.3069	20.9789	lncRNA	ENSG00000257176	havana	3	1	0.0130035	0.180754	4.99421	2.32026	4.99421	34.9991	7.00794	1.40373	17.7685	0.0130019	0.180731
AC009690.1	AC009690.1	52.5841	32.3874	64.0768	26.6399	17.1408	11.5693	15	72284727	72375982	-	204.398	64.0768	28.8492	34.0664	protein_coding	ENSG00000260729	havana	1	1	0.00777966	0.135352	0.37011	-1.43397	-2.7019	18.3064	49.4621	-5.61765	-1.29952	0.00777841	0.13533
AC010207.1	AC010207.1	8.59836	4.44293	21.1254	6.5103	0.918386	0	3	134347288	134349234	-	41.5953	21.1254	0	6.93256	lncRNA	ENSG00000260633	havana	1	1	0.104959	0.491487	0.212713	-2.23302	-4.70117	2.40198	11.2921	-30.5381	1.38175	0.104956	0.491472
AC010247.2	AC010247.2	35.3488	27.5461	42.2507	16.2758	20.2045	22.2749	19	42152569	42157524	+	163.901	42.2507	25.8928	27.3168	lncRNA	ENSG00000259436	havana	1	1	0.0912622	0.460866	0.563566	-0.827344	-1.77442	19.651	34.8691	-3.45228	1.09646	0.0912591	0.46085
AC010343.1	AC010343.1	29.7276	51.3589	56.9802	96.9129	66.9177	66.4816	5	33162179	33162808	+	368.379	96.9129	57.8567	61.3965	processed_pseudogene	ENSG00000240376	havana	1	1	0.0676749	0.403652	1.6723	0.741834	1.6723	76.6189	45.8165	-1.03808	2.90308	0.0676719	0.403634
AC010343.3	AC010343.3	286.612	282.57	367.053	183.373	272.761	137.933	5	32888236	33298067	-	1530.3	367.053	242.841	255.05	lncRNA	ENSG00000250697	havana	2	1	0.0292934	0.274364	0.63516	-0.654807	-1.57441	197.989	311.714	-2.36797	-1.04678	0.0292911	0.274342
AC010533.1	AC010533.1	37.6182	32.1961	26.5132	4.36007	13.8895	13.9244	16	64981123	64983228	-	128.501	37.6182	17.3289	21.4169	TEC	ENSG00000278893	havana	1	1	0.0128851	0.17982	0.336925	-1.5695	-2.96802	10.8454	32.1892	-6.99549	-1.25926	0.0128835	0.179798
AC010733.1	AC010733.1	4.1056	7.816	0.156751	45.3882	51.1582	8.42463	2	60925909	60931611	+	117.049	51.1582	6.79459	19.5082	lncRNA	ENSG00000267520	havana	2	1	0.00214464	0.0645096	8.35532	3.0627	8.35532	34.9372	4.18143	2.15407	32.4092	0.00214407	0.0644924
AC010754.1	AC010754.1	0	0.888585	0	2.1701	0.918386	10.2807	18	23957754	23982557	-	14.2578	10.2807	0	2.3763	lncRNA	ENSG00000265752	havana	3	1	0.0936883	0.467915	12.0359	3.58927	12.0359	4.47927	0.372159	-1.52362	220.716	0.0936852	0.467899
AC010980.2	AC010980.2	0	1.77717	4.5167e-34	0	1.83677	45.4066	2	222317242	222318654	-	49.0205	45.4066	0	8.17009	lncRNA	ENSG00000267034	havana	1	1	0.0285457	0.271023	24.8893	4.63745	24.8893	15.786	0.63425	1.4011	442.135	0.0285434	0.271001
AC011447.1	AC011447.1	24.2773	5.00168	17.493	26.2327	47.3096	28.0749	19	20125044	20125485	+	148.389	47.3096	20.4903	24.7315	transcribed_processed_pseudogene	ENSG00000224864	havana	4	1	0.100687	0.482905	2.1862	1.12843	2.1862	33.9	15.5063	-1.16385	5.56258	0.100684	0.48289
AC011611.3	AC011611.3	174.702	88.2388	118.471	334.114	375.691	999.585	12	76030494	76031379	+	2090.8	999.585	247.373	348.467	lncRNA	ENSG00000257453	havana	1	1	1.07847e-06	0.000303447	4.48361	2.16466	4.48361	570.074	127.146	2.45331	8.19413	1.07682e-06	0.000302983
AC012020.1	AC012020.1	7.64298	2.66576	1.32034	7.59535	15.6126	14.5644	3	108032456	108039917	-	49.4014	15.6126	5.9958	8.23356	lncRNA	ENSG00000279277	havana	2	1	0.0917317	0.462275	3.19001	1.67356	3.19001	12.6313	3.95964	-1.20712	12.2838	0.0917285	0.46226
AC012313.1	AC012313.1	537.875	487.833	676.012	361.042	326.945	454.923	19	58404238	58408485	-	2844.63	676.012	460.412	474.105	lncRNA	ENSG00000232098	ensembl_havana	3	1	0.0100246	0.154068	0.672848	-0.571648	-1.48622	381.163	566.492	-2.00939	-1.09926	0.0100232	0.154046
AC012443.2	AC012443.2	36.3042	24.8804	52.8134	7.59535	24.7964	2.57018	2	152635268	152641276	-	148.96	52.8134	16.875	24.8267	lncRNA	ENSG00000286207	havana	1	1	0.0356834	0.30297	0.307829	-1.6998	-3.24855	11.6593	37.8758	-9.75305	-1.08203	0.0356809	0.302949
AC012510.1	AC012510.1	8.63603	13.7401	8.43132	3.27504e-12	1.01526	4.28364	2	218633256	218634015	-	36.1063	13.7401	0.0492381	6.01772	lncRNA	ENSG00000273466	havana	1	1	0.0489797	0.350698	0.177273	-2.49595	-5.64101	1.82586	10.2997	-31.5758	-1.00777	0.048977	0.350679
AC012513.3	AC012513.3	35.3488	61.3124	31.6881	88.9741	54.1848	122.512	2	216211404	216213520	+	394.02	122.512	58.6169	65.67	TEC	ENSG00000279348	havana	1	1	0.0243908	0.250201	2.05902	1.04196	2.05902	88.6091	43.0346	1.09785	3.86169	0.0243886	0.250179
AC012676.1	AC012676.1	24.4856	36.0254	19.9178	7.02496	8.38159	4.73842	16	4335870	4337819	-	100.574	36.0254	13.0335	16.7623	lncRNA	ENSG00000262712	havana	1	1	0.00271801	0.0734728	0.248289	-2.00991	-4.02757	6.6914	26.9501	-10.0137	-1.61991	0.00271734	0.0734549
AC015799.1	AC015799.1	0	0	1.32034	2.1701	10.1022	2.57018	17	2639297	2642419	+	16.1629	10.1022	0	2.69381	TEC	ENSG00000279432	havana	1	1	0.0597779	0.381707	13.3229	3.73584	13.3229	4.95825	0.372159	-1.11256	197.48	0.059775	0.381689
AC015802.1	AC015802.1	0.955373	3.00677	19.3224	2.26874	1.12575e-37	2.90054e-32	17	76569792	76571241	+	25.5532	19.3224	8.62329e-12	4.25887	lncRNA	ENSG00000267078	havana	1	1	0.0763612	0.427391	0.0932411	-3.42289	-10.7249	0.714976	7.66803	-147.896	1.28579	0.0763581	0.427374
AC015813.1	AC015813.1	381.21	342.105	467.398	183.296	194.698	368.393	17	57989039	57994851	-	1937.1	467.398	304.77	322.85	lncRNA	ENSG00000264112	havana	1	1	0.0340994	0.295575	0.628231	-0.670632	-1.59177	249.132	396.561	-2.44691	-1.03548	0.034097	0.295554
AC015813.2	AC015813.2	196.555	184.506	240.041	118.911	98.1594	51.4714	17	57989038	58007247	-	889.643	240.041	131.75	148.274	protein_coding	ENSG00000266086	havana	3	1	0.000555341	0.0276823	0.431467	-1.21268	-2.31768	89.2195	206.782	-3.73495	-1.43821	0.000555111	0.0276709
AC015813.6	AC015813.6	109.868	91.5243	108.268	70.5283	56.9399	77.1055	17	58095672	58101480	+	514.233	109.868	83.4248	85.7056	TEC	ENSG00000279207	havana	1	1	0.0459462	0.340104	0.661639	-0.595883	-1.5114	68.2049	103.085	-2.2674	-1.00746	0.0459435	0.340084
AC015871.3	AC015871.3	77.3852	32.8777	40.9304	16.2758	13.7758	39.4095	15	79920195	79922456	-	220.654	77.3852	31.1873	36.7757	lncRNA	ENSG00000278600	havana	1	1	0.0666059	0.400625	0.461105	-1.11683	-2.1687	23.2649	50.4547	-4.95939	1.05446	0.0666029	0.400607
AC015922.3	AC015922.3	17.1967	8.88585	6.60168	15.1907	21.1229	73.6786	17	15789016	15789706	+	142.676	73.6786	16.966	23.7794	lncRNA	ENSG00000276855	havana	1	1	0.0285626	0.271023	3.3507	1.74446	3.3507	36.7896	10.9797	1.13513	9.89064	0.0285603	0.271001
AC016074.2	AC016074.2	0	0	0	0	6.4287	20.5615	8	125648327	126008931	+	26.9902	20.5615	0	4.49836	lncRNA	ENSG00000286122	havana	1	1	0.0175399	0.212372	47.2268	5.56153	47.2268	9.02383	0.191074	1.96194	1136.82	0.017538	0.212349
AC016596.1	AC016596.1	11.4645	8.88585	13.2034	0	0	4.28364	5	55995167	56003650	+	37.8373	13.2034	0	6.30622	lncRNA	ENSG00000227908	havana	3	1	0.0389028	0.315491	0.132812	-2.91255	-7.52946	1.48241	11.1618	-51.1498	-1.10837	0.0389002	0.315471
AC016739.1	AC016739.1	163.215	189.675	137.594	340.801	336.918	365.844	2	176200908	176201253	-	1534.05	365.844	237.383	255.675	processed_pseudogene	ENSG00000218175	havana	2	1	2.95769e-07	0.000116918	2.11955	1.08376	2.11955	347.927	164.151	1.59042	2.82472	2.9522e-07	0.000116701
AC016876.2	AC016876.2	34.3934	40.8749	34.3287	10.8505	19.0992	11.1375	17	7581964	7584087	-	150.684	40.8749	21.9351	25.114	lncRNA	ENSG00000233223	havana	3	1	0.0075916	0.13347	0.375215	-1.41421	-2.66514	13.7279	36.5867	-5.47341	-1.29772	0.00759037	0.133449
AC018629.1	AC018629.1	21.9736	15.9945	14.5237	8.6804	4.59193	3.42691	17	40473554	40475290	-	69.1911	21.9736	9.41668	11.5318	TEC	ENSG00000279806	havana	1	1	0.0313933	0.282687	0.312795	-1.67671	-3.19698	5.48794	17.5448	-9.21355	-1.10931	0.0313909	0.282665
AC018638.4	AC018638.4	94.428	87.1799	95.6204	55.1653	60.6265	72.5239	7	128651185	128652335	+	465.544	95.6204	75.8833	77.5906	processed_pseudogene	ENSG00000243302	havana	3	1	0.0652665	0.397188	0.68151	-0.553192	-1.46733	62.9193	92.3233	-2.20588	1.02454	0.0652635	0.39717
AC018638.5	AC018638.5	78.3406	81.7498	59.4151	48.8273	45.0009	47.12	7	128653969	128654723	+	360.454	81.7498	58.3324	60.0756	processed_pseudogene	ENSG00000243679	havana	1	1	0.056505	0.373434	0.639066	-0.645964	-1.56478	46.9586	73.4801	-2.47912	1.01248	0.0565022	0.373415
AC018647.2	AC018647.2	227.379	197.266	184.847	135.631	152.452	110.518	7	35695214	35699414	+	1008.09	227.379	163.276	168.015	lncRNA	ENSG00000271122	havana	1	1	0.0122713	0.174551	0.652712	-0.615482	-1.53207	132.762	203.401	-2.13938	-1.09716	0.0122697	0.174528
AC018978.1	AC018978.1	41.081	55.0923	50.1728	33.6366	20.2045	25.7018	10	4747846	4785101	-	225.889	55.0923	35.4463	37.6482	lncRNA	ENSG00000287023	havana_tagene	1	1	0.0428173	0.330522	0.5414	-0.885232	-1.84706	26.409	48.7791	-3.34458	-1.02005	0.0428147	0.330501
AC019080.1	AC019080.1	24.519	39.3849	28.8683	48.9218	52.1533	58.9358	2	177283508	177392692	-	252.783	58.9358	40.1547	42.1305	lncRNA	ENSG00000213963	havana	6	1	0.0570827	0.375168	1.72061	0.782918	1.72061	53.3959	31.0332	-1.01647	3.00926	0.0570798	0.375149
AC019257.8	AC019257.8	34.5526	9.86977	23.6909	18.9621	68.4135	157.167	8	1763888	1958628	+	312.655	157.167	34.3658	52.1092	protein_coding	ENSG00000283239	havana	1	1	0.0139738	0.187884	3.60394	1.84957	3.60394	81.6715	22.6618	1.29659	10.0173	0.0139721	0.187862
AC020916.1	AC020916.1	1206.78	1330.96	1831.14	1092.46	941.08	608.954	19	13823880	13842929	-	7011.37	1831.14	1107.1	1168.56	lncRNA	ENSG00000267519	havana	6	1	0.00631669	0.119301	0.604851	-0.725347	-1.6533	880.444	1455.64	-2.37171	-1.1525	0.00631559	0.11928
AC020917.4	AC020917.4	36.3042	23.9918	33.0084	22.7861	8.26547	4.28364	19	16356329	16358328	-	128.64	36.3042	16.8875	21.4399	TEC	ENSG00000280332	havana	1	1	0.0499718	0.355056	0.373921	-1.4192	-2.67436	11.6162	31.0659	-7.15136	-1.00012	0.049969	0.355037
AC020978.5	AC020978.5	29.2138	0.0599811	2.55412	46.4116	37.2135	31.1302	16	68225969	68229146	-	146.583	46.4116	7.88664	24.4305	lncRNA	ENSG00000262160	havana	1	1	0.101777	0.484324	3.57971	1.83984	3.57971	38.2338	10.6807	-1.28693	16.4912	0.101774	0.484309
AC021016.1	AC021016.1	12.4198	15.9945	17.1644	24.9562	30.3067	72.8219	2	218255319	218257367	+	173.664	72.8219	23.9304	28.9439	lncRNA	ENSG00000261338	havana	2	1	0.0145984	0.193196	2.82891	1.50025	2.82891	42.8455	15.1456	1.22794	6.51722	0.0145967	0.193173
AC021016.2	AC021016.2	0.0114368	5.26326	7.92201	12.9738	16.8179	16.2778	2	218398743	218399220	-	59.2662	16.8179	3.45254	9.8777	lncRNA	ENSG00000273361	havana	1	1	0.078032	0.43014	3.57821	1.83924	3.57821	15.3706	4.29561	-1.1538	14.7727	0.0780289	0.430123
AC021087.2	AC021087.2	47.6683	52.6562	60.5027	35.3192	24.224	36.3565	5	288833	290322	-	256.727	60.5027	40.9621	42.7878	processed_pseudogene	ENSG00000250848	havana	1	1	0.0660519	0.399242	0.597419	-0.743186	-1.67387	31.9441	53.4701	-2.8992	1.03475	0.066049	0.399224
AC022075.1	AC022075.1	30.0644	17.1586	29.0474	34.0243	40.5707	89.1239	12	10363638	10398507	+	239.989	89.1239	35.0165	39.9982	lncRNA	ENSG00000245648	havana	2	1	0.0439606	0.332832	2.16195	1.11234	2.16195	54.7357	25.3177	1.02108	4.57755	0.0439579	0.332811
AC022098.1	AC022098.1	91.7158	91.5243	88.4625	62.9329	37.7167	33.4124	19	14137146	14171268	+	405.765	91.7158	62.3749	67.6274	lncRNA	ENSG00000267169	havana	2	1	0.00573454	0.113081	0.490323	-1.0282	-2.03947	44.4228	90.5992	-3.3815	-1.23006	0.00573349	0.11306
AC022400.7	AC022400.7	70.5058	120.822	95.745	6.50961	46.9768	57.7628	10	73796514	73811652	-	398.322	120.822	49.3282	66.387	protein_coding	ENSG00000272916	havana	5	1	0.0354457	0.302159	0.389369	-1.36079	-2.56826	37.2667	95.7105	-6.18548	-1.06636	0.0354432	0.302138
AC022400.8	AC022400.8	68.7869	66.6439	51.4931	43.402	7.34709	28.272	10	73742995	73744231	-	265.945	68.7869	35.8646	44.3242	TEC	ENSG00000279088	havana	1	1	0.0397598	0.318341	0.420175	-1.25094	-2.37996	26.2169	62.3952	-5.43886	-1.04143	0.0397573	0.31832
AC022413.3	AC022413.3	7.46341	12.8493	3.40892e-18	0.691497	0.0809789	1.36842	5	180833928	180835727	-	22.4536	12.8493	0.00171055	3.74227	lncRNA	ENSG00000286128	havana	1	1	0.0819359	0.438806	0.105299	-3.24744	-9.49681	0.72055	6.84292	-119.954	1.33003	0.0819328	0.438789
AC022613.1	AC022613.1	600.93	698.428	801.444	614.138	594.196	329.84	15	29674990	29680958	+	3638.98	801.444	585.985	606.496	lncRNA	ENSG00000256802	havana	2	1	0.0991402	0.4797	0.732042	-0.450002	-1.36604	512.384	699.939	-1.97911	1.06058	0.0991371	0.479685
AC022826.2	AC022826.2	13.9805	9.8317	14.6432	41.5826	22.5655	90.9786	8	73688691	73878855	-	193.582	90.9786	23.5784	32.2637	protein_coding	ENSG00000258677	havana	2	1	0.0020081	0.0625159	4.0621	2.02223	4.0621	51.8046	12.7531	1.6692	9.88536	0.00200755	0.0624988
AC023509.3	AC023509.3	5.73224	2.66576	15.844	3.25515	0	0	12	53500162	53500937	-	27.4972	15.844	0	4.58286	lncRNA	ENSG00000270175	havana	1	1	0.081306	0.437493	0.128753	-2.95733	-7.76683	1.03029	8.00207	-77.842	1.29041	0.0813029	0.437476
AC023632.2	AC023632.2	0	1.77717	2.64067	5.42525	11.939	6.85382	8	94553668	94570649	+	28.6359	11.939	0	4.77266	lncRNA	ENSG00000253704	havana	2	1	0.0608452	0.384716	5.7032	2.51177	5.7032	8.08771	1.4181	-1.08249	35.2096	0.0608422	0.384698
AC024075.1	AC024075.1	8.59836	10.663	6.60168	16.2758	14.6942	25.7018	19	16639967	16640669	-	82.5348	25.7018	12.448	13.7558	lncRNA	ENSG00000267904	havana	1	1	0.10456	0.490994	2.17531	1.12122	2.17531	18.9394	8.70654	-1.17501	5.56014	0.104557	0.490979
AC024293.1	AC024293.1	3027.5	3521.9	4087.81	5532.19	5274.98	3976.74	11	46428653	46429151	-	25421.1	5532.19	4143.17	4236.85	processed_pseudogene	ENSG00000244313	havana	3	1	0.0142153	0.189664	1.38999	0.475072	1.38999	4927.57	3545.05	1.06829	1.80857	0.0142136	0.189641
AC024940.3	AC024940.3	13.3752	8.88585	6.60168	13.0314	22.8634	47.12	12	31251992	31252598	-	111.878	47.12	14.9165	18.6463	processed_pseudogene	ENSG00000243517	havana	1	1	0.0393404	0.317525	2.86495	1.51851	2.86495	27.7944	9.70154	1.05275	7.79663	0.0393378	0.317505
AC025048.2	AC025048.2	58.2912	60.4238	69.9778	22.1932	31.5864	24.8451	17	60122642	60135744	-	267.318	69.9778	40.314	44.5529	lncRNA	ENSG00000267248	havana	3	1	0.00139166	0.0492823	0.418551	-1.25652	-2.3892	26.267	62.7571	-4.07554	-1.40061	0.00139123	0.049267
AC025171.1	AC025171.1	36.3042	41.7635	36.9694	18.4459	17.4493	21.4182	5	43013060	43067453	-	172.35	41.7635	26.9883	28.7251	lncRNA	ENSG00000177738	havana	4	1	0.0285502	0.271023	0.498345	-1.00478	-2.00664	19.1317	38.3905	-3.74293	-1.07579	0.0285479	0.271001
AC026403.1	AC026403.1	489.925	511.183	412.448	707.375	841.622	887.174	5	166382305	166382600	+	3849.73	887.174	615.85	641.621	processed_pseudogene	ENSG00000229119	havana	3	1	1.42432e-05	0.00198448	1.72171	0.78384	1.72171	812.45	471.886	1.34712	2.20046	1.42293e-05	0.00198254
AC026956.2	AC026956.2	14.3306	18.6603	29.0474	3.25515	6.4287	1.71346	15	82113384	82119571	+	73.4356	29.0474	8.08121	12.2393	lncRNA	ENSG00000287872	havana_tagene	1	1	0.00406195	0.0916374	0.184459	-2.43862	-5.42125	3.79217	20.5583	-17.1729	-1.71142	0.0040611	0.0916182
AC027601.6	AC027601.6	60.1885	63.9781	69.9778	16.2758	34.8987	25.7018	17	81339183	81345967	-	271.021	69.9778	39.7316	45.1701	lncRNA	ENSG00000287431	havana	1	1	0.00214954	0.0645096	0.398565	-1.32711	-2.509	25.7612	64.6347	-4.51493	-1.39428	0.00214897	0.0644924
AC034236.1	AC034236.1	528.556	499.095	412.555	802.014	909.211	986.153	5	116051917	116052290	-	4137.58	986.153	654.02	689.597	processed_pseudogene	ENSG00000185641	havana	6	1	4.96684e-07	0.000175888	1.87074	0.903612	1.87074	899.477	480.812	1.46547	2.38809	4.9583e-07	0.000175586
AC036108.2	AC036108.2	15.9242	10.8981	27.9611	2.29336	4.3173	5.96426	15	99128832	99131807	-	67.3583	27.9611	8.11958	11.2264	lncRNA	ENSG00000261054	havana	1	1	0.0140284	0.188029	0.234657	-2.09138	-4.26154	4.24601	18.0946	-13.5478	-1.3405	0.0140267	0.188006
AC040162.1	AC040162.1	32.585	16.2137	45.4275	19.7603	16.1524	10.5871	16	67929614	67936018	-	140.726	45.4275	20.8051	23.4543	protein_coding	ENSG00000261884	havana	2	1	0.103574	0.488759	0.494975	-1.01457	-2.0203	15.4259	31.1651	-4.71155	1.15433	0.103571	0.488744
AC044787.1	AC044787.1	164.314	210.765	161.535	374.048	230.828	326.163	15	47730144	47730936	-	1467.65	374.048	232.398	244.609	processed_pseudogene	ENSG00000213862	havana	4	1	0.00292869	0.0756564	1.73098	0.79159	1.73098	310.139	179.17	1.2059	2.4847	0.00292799	0.0756383
AC044860.1	AC044860.1	26.2593	33.1025	27.4182	16.5681	11.1709	4.15038	15	85180200	85234796	-	118.669	33.1025	16.2345	19.7782	transcribed_unprocessed_pseudogene	ENSG00000229212	havana	8	1	0.0281391	0.269166	0.362716	-1.46309	-2.75698	10.5039	28.9591	-6.81779	-1.11487	0.0281368	0.269144
AC064799.1	AC064799.1	18.3924	21.0086	8.06869	28.1691	33.7224	35.6668	15	71341158	71341713	-	145.028	35.6668	21.742	24.1713	processed_pseudogene	ENSG00000212664	ensembl_havana	5	1	0.0761004	0.426781	2.02584	1.01852	2.02584	32.5619	16.0733	-1.07692	4.41971	0.0760973	0.426764
AC064807.1	AC064807.1	17.1967	13.3288	10.5627	3.25515	4.59193	7.71055	8	51899268	51949875	+	56.6458	17.1967	8.0837	9.44097	lncRNA	ENSG00000228801	havana	6	1	0.0930201	0.465947	0.381002	-1.39213	-2.62466	5.24088	13.7555	-8.09242	1.17471	0.093017	0.465931
AC067750.1	AC067750.1	25.7951	23.9918	44.8914	20.616	3.67354	3.42691	10	86749754	86756299	-	122.395	44.8914	13.8993	20.3991	lncRNA	ENSG00000272631	havana	1	1	0.0309744	0.281143	0.289003	-1.79084	-3.46017	9.08536	31.4369	-10.6871	-1.12031	0.030972	0.281122
AC067904.2	AC067904.2	7.64535	6.24523	13.2092	0	2.75516	0.856728	8	27063996	27065279	-	30.7116	13.2092	0	5.11861	processed_pseudogene	ENSG00000253899	havana	1	1	0.0317673	0.2842	0.137406	-2.86348	-7.27769	1.23221	8.96761	-44.5423	-1.18909	0.0317649	0.284179
AC068205.2	AC068205.2	42.0364	44.4293	35.6491	22.786	11.0206	31.6989	11	43578889	43840031	+	187.62	44.4293	28.4475	31.2701	lncRNA	ENSG00000283341	havana	2	1	0.0944278	0.468775	0.536123	-0.899364	-1.86524	21.8682	40.7894	-3.87264	1.1131	0.0944247	0.468759
AC068234.1	AC068234.1	0.639725	8.93386	6.68356	0.102507	0.018444	0.011842	17	47253897	47344293	+	16.3899	8.93386	0.308091	2.73166	protein_coding	ENSG00000259753	havana	1	1	0.024623	0.251288	0.0351136	-4.83183	-28.479	0.190088	5.41352	-528.557	-1.53447	0.0246208	0.251265
AC068473.5	AC068473.5	30.5719	59.5352	40.9304	18.4459	28.47	24.8451	18	79677287	79679359	-	202.798	59.5352	31.4735	33.7997	lncRNA	ENSG00000274828	havana	1	1	0.0778605	0.429877	0.548104	-0.867477	-1.82447	23.9928	43.7741	-3.55967	1.06939	0.0778575	0.42986
AC068580.3	AC068580.3	35.6172	41.7635	61.8388	64.1616	32.1435	236.194	11	1760348	1762487	+	471.719	236.194	59.5972	78.6198	lncRNA	ENSG00000235027	havana	1	1	0.05971	0.381466	2.39811	1.2619	2.39811	110.98	46.2783	-1.03643	5.96044	0.0597071	0.381447
AC068631.4	AC068631.4	16.2413	21.326	21.1254	46.6572	41.3274	20.5615	3	186596976	186597201	+	167.239	46.6572	25.7291	27.8731	processed_pseudogene	ENSG00000283390	ensembl_havana	1	1	0.104459	0.490902	1.84601	0.884413	1.84601	36.0572	19.5325	-1.13542	3.86923	0.104456	0.490887
AC068775.1	AC068775.1	3.29351	10.2229	1.89606e-15	17.1097	12.0347	28.0111	12	10412312	10436002	-	70.6719	28.0111	0.0267721	11.7786	protein_coding	ENSG00000255641	havana	1	1	0.0514726	0.35973	4.08607	2.03071	4.08607	19.0739	4.66803	-1.00904	16.8468	0.0514698	0.359711
AC068831.8	AC068831.8	189.146	237.931	238.971	141.745	102.055	128.351	15	90966190	91022567	-	1038.2	238.971	164.711	173.033	protein_coding	ENSG00000284946	havana	1	1	0.000807855	0.0346723	0.558496	-0.840382	-1.79052	123.899	221.845	-2.51758	-1.27344	0.000807556	0.0346595
AC073111.4	AC073111.4	65.7245	33.7662	29.0474	97.6545	55.3212	75.3921	7	150400702	150412471	+	356.906	97.6545	54.5177	59.4843	protein_coding	ENSG00000284691	ensembl_havana	1	1	0.0750542	0.424195	1.76555	0.820116	1.76555	76.0151	43.0547	-1.05911	3.30141	0.0750512	0.424178
AC073508.2	AC073508.2	14.1738	3.33315	34.5967	1.38619	5.73178	0.00360599	17	40627356	40665142	-	59.2253	34.5967	1.89854	9.87088	protein_coding	ENSG00000264058	havana	2	1	0.0299548	0.277327	0.137746	-2.85992	-7.25975	2.37466	17.2394	-43.4776	-1.21221	0.0299525	0.277305
AC073861.1	AC073861.1	2819.54	3686.48	3491.22	7137.51	5855.67	3746.54	3	101576489	101576948	-	26736.9	7137.51	4224.29	4456.16	processed_pseudogene	ENSG00000242299	havana	1	1	0.0029203	0.0756564	1.67432	0.743579	1.67432	5579.41	3332.33	1.1924	2.35102	0.0029196	0.0756383
AC073896.1	AC073896.1	8.32956	15.6846	8.35795	7.79456	87.0284	80.7772	12	56285916	56316060	-	207.972	87.0284	19.7768	34.662	protein_coding	ENSG00000144785	havana	8	1	0.00336382	0.0808745	5.40127	2.4333	5.40127	58.6555	10.8596	1.74948	16.6756	0.00336306	0.0808562
AC073957.3	AC073957.3	165.775	126.145	185.849	34.5011	68.2063	43.0268	7	879790	886548	-	623.502	185.849	85.6033	103.917	lncRNA	ENSG00000273151	havana	1	1	2.16228e-06	0.00047733	0.306418	-1.70643	-3.26352	48.7114	158.971	-5.3234	-2.00071	2.15932e-06	0.000476677
AC074117.1	AC074117.1	128.02	157.089	158.44	119.635	88.165	77.1055	2	27356246	27367623	+	728.455	158.44	117.198	121.409	lncRNA	ENSG00000234072	havana	1	1	0.0269765	0.263987	0.640872	-0.641893	-1.56037	94.6758	147.73	-2.31447	-1.05198	0.0269742	0.263965
AC074143.1	AC074143.1	193.479	176.936	168.738	109.163	89.8448	54.9374	16	67163385	67165816	+	793.098	193.479	120.832	132.183	protein_coding	ENSG00000265690	havana	7	1	0.000616686	0.0297336	0.469046	-1.0922	-2.13199	84.3421	179.816	-3.28832	-1.38228	0.000616439	0.0297217
AC079949.2	AC079949.2	1.91075	0.888585	7.92202	6.5103	0	63.3979	12	127147149	127150082	+	80.6295	63.3979	0	13.4383	lncRNA	ENSG00000278266	havana	1	1	0.0747266	0.42359	6.70273	2.74475	6.70273	23.3503	3.48371	-1.20906	54.3187	0.0747236	0.423573
AC083843.3	AC083843.3	99.3588	129.733	145.237	57.5077	45.9193	69.395	8	134792020	134798273	-	547.151	145.237	83.6689	91.1919	lncRNA	ENSG00000259820	havana	1	1	0.000671315	0.0311231	0.463075	-1.11068	-2.15948	57.6619	124.519	-3.36531	-1.38571	0.000671052	0.0311109
AC083843.4	AC083843.4	1.91075	1.77717	0	5.42525	4.59193	17.1346	8	134783694	134785880	-	30.8397	17.1346	0	5.13994	TEC	ENSG00000279518	havana	1	1	0.0404787	0.320748	7.00413	2.80821	7.00413	9.09079	1.29792	1.0881	45.0859	0.0404761	0.320727
AC084018.2	AC084018.2	18.099	36.7618	32.9577	13.5007	6.47704	12.4124	12	121800797	121803404	+	120.209	36.7618	16.9603	20.0348	lncRNA	ENSG00000274292	havana	1	1	0.0233663	0.24601	0.368148	-1.44164	-2.7163	10.7641	29.2385	-6.44335	-1.1451	0.0233641	0.245987
AC084198.4	AC084198.4	39.1703	30.2119	35.6491	14.1057	22.0413	17.1346	3	101686827	101700927	+	158.313	39.1703	24.6574	26.3855	lncRNA	ENSG00000286699	havana_tagene	1	1	0.0494496	0.352429	0.509325	-0.973341	-1.96338	17.8152	34.978	-3.84861	-1.00163	0.0494468	0.35241
AC084262.2	AC084262.2	5.73224	6.2201	3.96101	13.0206	10.1022	30.8422	8	29351292	29360223	+	69.8784	30.8422	9.11354	11.6464	lncRNA	ENSG00000285601	havana	1	1	0.0376475	0.311286	3.36811	1.75194	3.36811	18.0563	5.36096	1.07181	10.5841	0.0376449	0.311265
AC087741.1	AC087741.1	22.8661	37.3206	29.0474	13.0206	15.6126	12.8509	17	80200673	80205950	-	130.718	37.3206	20.0392	21.7864	lncRNA	ENSG00000262580	havana	5	1	0.0429181	0.330849	0.464445	-1.10642	-2.15311	13.8351	29.7884	-4.52391	-1.02475	0.0429155	0.330829
AC087854.1	AC087854.1	6.74314	7.19026	7.98433	20.7774	9.18386	27.5389	8	22481588	22553445	-	79.4179	27.5389	11.2564	13.2363	lncRNA	ENSG00000251034	havana	2	1	0.0659836	0.399142	2.63381	1.39715	2.63381	19.179	7.28184	-1.06605	7.39517	0.0659806	0.399124
AC090181.3	AC090181.3	3.82149	10.663	1.32034	0	0	0	15	77063397	77064911	-	15.8049	10.663	0	2.63414	TEC	ENSG00000278991	havana	1	1	0.0248669	0.253096	0.0328504	-4.92795	-30.4411	0.174496	5.31185	-601.804	-1.5398	0.0248647	0.253074
AC090204.1	AC090204.1	65.9207	78.1955	89.7828	103.08	142.35	119.942	8	32927913	33045446	+	599.271	142.35	96.6384	99.8784	lncRNA	ENSG00000247134	havana	7	1	0.0280874	0.269047	1.56925	0.650074	1.56925	121.925	77.6963	1.04964	2.34609	0.0280851	0.269025
AC090578.2	AC090578.2	1.91075	0.888585	0	10.8505	1.83677	14.5644	8	88808318	88808909	-	30.051	14.5644	0	5.0085	lncRNA	ENSG00000271156	havana	1	1	0.0328818	0.289598	9.24378	3.20848	9.24378	9.08547	0.982873	1.19832	71.3062	0.0328793	0.289577
AC090826.3	AC090826.3	5.73224	8.88585	14.5237	2.1701	0.918386	0	15	74429445	74431450	+	32.2303	14.5237	0	5.37171	lncRNA	ENSG00000286696	havana_tagene	1	1	0.0160697	0.203972	0.101821	-3.2959	-9.82118	0.982293	9.64727	-63.0877	-1.52891	0.0160679	0.203949
AC091057.1	AC091057.1	183.432	158.168	236.34	129.121	108.37	110.518	15	30658717	30772994	+	925.948	236.34	148.222	154.325	lncRNA	ENSG00000187951	havana	11	1	0.00587465	0.114515	0.603432	-0.728737	-1.65719	115.864	192.009	-2.37385	-1.15689	0.00587358	0.114494
AC091182.2	AC091182.2	29.6166	21.326	35.6491	78.1236	40.409	39.4095	8	37405439	37406725	-	244.534	78.1236	37.5456	40.7556	lncRNA	ENSG00000253746	havana	1	1	0.0764072	0.427465	1.82903	0.871078	1.82903	52.4537	28.6785	-1.06617	3.56672	0.0764042	0.427448
AC091429.1	AC091429.1	0	1.79945	1.32798	3.47833	5.52281	12.0198	5	86884231	86884882	-	24.1483	12.0198	0	4.02472	processed_pseudogene	ENSG00000242477	havana	1	1	0.0645521	0.395369	6.796	2.76469	6.796	7.0429	1.03633	-1.12269	51.852	0.0645491	0.39535
AC092017.1	AC092017.1	200.298	172.18	294.47	147.724	122.145	173.059	1	211207239	211207898	+	1109.88	294.47	177.911	184.979	processed_pseudogene	ENSG00000226986	havana	4	1	0.0481415	0.347704	0.666489	-0.585347	-1.5004	147.698	221.606	-2.24374	-1.00332	0.0481388	0.347685
AC092139.1	AC092139.1	9.55373	8.88585	14.5237	2.1701	3.67354	3.42691	16	81385463	81387561	+	42.2338	14.5237	5.68289	7.03897	lncRNA	ENSG00000272923	havana	1	1	0.0555742	0.37018	0.285502	-1.80843	-3.5026	3.11436	10.9083	-12.6401	1.03031	0.0555714	0.370161
AC092299.1	AC092299.1	74.1259	116.519	166.625	26.9952	51.7244	24.1684	19	197310	198067	-	460.158	166.625	60.4027	76.693	processed_pseudogene	ENSG00000282416	havana	1	1	0.000123203	0.00978596	0.28906	-1.79056	-3.45949	34.3286	118.759	-6.51844	-1.83603	0.000123127	0.00977994
AC093157.1	AC093157.1	14.3306	39.9863	30.3677	80.2937	52.348	38.5528	1	101025844	101090514	+	255.879	80.2937	37.587	42.6465	lncRNA	ENSG00000233184	havana	7	1	0.0607948	0.384716	2.01614	1.01159	2.01614	56.9183	28.2314	-1.03229	4.19606	0.0607919	0.384698
AC093227.1	AC093227.1	0.0966264	0.115549	0.104923	11.5022	0.152597	30.3257	19	37728586	37730644	-	42.2976	30.3257	0.629717	7.0496	lncRNA	ENSG00000267152	havana	1	1	0.00264893	0.0729809	59.6163	5.89763	59.6163	14.0122	0.23504	4.14696	857.037	0.00264827	0.0729629
AC093627.5	AC093627.5	74.5191	72.864	93.7439	62.9329	56.0215	39.4095	7	135853	149528	-	399.491	93.7439	64.3072	66.5818	lncRNA	ENSG00000242474	havana	3	1	0.0853999	0.447664	0.656684	-0.606729	-1.5228	52.6158	80.1235	-2.45894	1.06038	0.0853968	0.447648
AC093673.1	AC093673.1	25.7951	20.4375	18.4847	13.0206	11.0206	4.28364	7	143379692	143380496	-	93.0421	25.7951	13.4763	15.507	lncRNA	ENSG00000232533	havana	1	1	0.0817697	0.438323	0.432672	-1.20866	-2.31122	9.35498	21.6214	-5.9369	1.11142	0.0817666	0.438306
AC093928.1	AC093928.1	0	39.9863	0	0	0	0	3	57293083	57300188	+	39.9863	39.9863	0	6.66439	lncRNA	ENSG00000286952	havana_tagene	1	1	0.0236766	0.24736	0.0130565	-6.25909	-76.5903	0.174498	13.3648	-3284.83	-1.78581	0.0236745	0.247338
AC098484.3	AC098484.3	35.9563	49.9096	16.5762	41.4218	79.6245	63.2999	1	42767292	42794494	+	286.788	79.6245	42.8733	47.7981	protein_coding	ENSG00000283580	havana	3	1	0.106908	0.495585	1.78396	0.835087	1.78396	61.5485	34.501	-1.13297	3.60571	0.106905	0.49557
AC099560.2	AC099560.2	297.33	407.758	263.117	506.917	513.004	454.483	3	40761545	40761800	+	2442.61	513.004	394.513	407.102	processed_pseudogene	ENSG00000234287	havana	1	1	0.00704742	0.125702	1.51894	0.603063	1.51894	491.375	323.499	1.12071	2.05866	0.00704624	0.125681
AC103718.1	AC103718.1	53.5009	17.7717	68.6575	9.76545	14.6942	14.5644	8	129685401	129723024	-	178.954	68.6575	22.6891	29.8257	lncRNA	ENSG00000285108	havana	1	1	0.00450515	0.0979266	0.281511	-1.82874	-3.55226	13.0574	46.3834	-8.51847	-1.48132	0.00450424	0.0979068
AC104211.1	AC104211.1	0	1.77717	1.32034	5.42525	5.51032	11.9942	8	92699742	92879503	-	26.0273	11.9942	0	4.33788	lncRNA	ENSG00000248858	havana	7	1	0.043481	0.331579	7.47677	2.90242	7.47677	7.66976	1.02581	1.06065	52.7054	0.0434784	0.331559
AC105036.3	AC105036.3	1.67776e-25	1.96913	2.85798	10.9779	7.5057	7.2142	15	75527150	75601206	-	30.5249	10.9779	0.000287206	5.08748	lncRNA	ENSG00000260269	havana	5	1	0.0545219	0.368692	5.50938	2.46189	5.50938	8.54508	1.55101	-1.03366	31.3749	0.0545191	0.368673
AC105052.3	AC105052.3	254.128	257.054	303.293	191.421	230.896	106.9	7	102637049	102671642	-	1343.69	303.293	213.085	223.949	protein_coding	ENSG00000267645	havana	5	1	0.0487069	0.350072	0.649627	-0.622316	-1.53934	176.228	271.276	-2.36379	-1.00245	0.0487042	0.350052
AC105942.1	AC105942.1	47.7686	44.4293	34.3287	74.8685	93.6753	46.2633	1	94927361	94963617	+	341.334	93.6753	53.5721	56.889	lncRNA	ENSG00000235501	havana	6	1	0.0703418	0.412034	1.68873	0.755941	1.68873	71.5199	42.3512	-1.04447	2.97863	0.0703388	0.412016
AC106712.2	AC106712.2	167.426	123.348	138.965	33.3843	148.149	61.4782	3	101960358	101997927	+	672.749	167.426	97.7544	112.125	lncRNA	ENSG00000241280	havana	1	1	0.105906	0.493607	0.566498	-0.819858	-1.76523	81.15	143.249	-3.5154	1.12816	0.105902	0.493592
AC106886.5	AC106886.5	30.8558	31.883	70.8969	23.0017	12.0804	7.40707	16	30773532	30776034	-	176.125	70.8969	22.8824	29.3541	TEC	ENSG00000280211	havana	1	1	0.0100902	0.154682	0.316843	-1.65816	-3.15614	14.0248	44.2641	-7.57569	-1.31489	0.0100888	0.15466
AC107027.3	AC107027.3	19.1075	21.326	14.5237	48.8273	38.5722	50.547	3	131455126	131458599	-	192.904	50.547	28.7389	32.1506	lncRNA	ENSG00000261167	havana	1	1	0.0043656	0.0955039	2.48769	1.31481	2.48769	45.9725	18.48	1.32939	4.65523	0.00436471	0.0954844
AC107071.1	AC107071.1	5.73224	7.10868	14.5237	2.1701	1.83677	1.71346	4	108669949	108678875	+	33.0849	14.5237	3.99117	5.51416	lncRNA	ENSG00000286136	havana_tagene	2	1	0.0454045	0.338057	0.210539	-2.24784	-4.74972	1.89809	9.0154	-21.8522	-1.03238	0.0454018	0.338037
AC107075.1	AC107075.1	182.151	222.841	223.186	239.237	331.348	386.745	2	164573741	164574055	+	1585.51	386.745	255.43	264.251	unprocessed_pseudogene	ENSG00000277998	havana	1	1	0.016101	0.203972	1.52688	0.610589	1.52688	319.511	209.257	1.08172	2.15525	0.0160992	0.203949
AC107954.1	AC107954.1	1.91489	1.77717	5.31336	14.125	9.19544	18.0173	15	88989519	88990246	-	50.3432	18.0173	5.90313	8.39053	processed_pseudogene	ENSG00000261549	havana	2	1	0.0195029	0.224601	4.79003	2.26004	4.79003	13.7888	2.87865	1.28666	17.8325	0.0195009	0.224578
AC107959.4	AC107959.4	5.51869	10.1768	13.2034	8.6804	33.0789	29.1288	8	23084355	23103559	+	99.7869	33.0789	13.5547	16.6311	lncRNA	ENSG00000284948	havana	1	1	0.0884426	0.455114	2.48699	1.3144	2.48699	23.7295	9.54143	-1.1469	7.09372	0.0884395	0.455098
AC109460.2	AC109460.2	41.081	39.9863	52.8134	29.2964	23.878	23.1317	16	28952816	28966884	-	210.187	52.8134	33.4621	35.0311	lncRNA	ENSG00000260853	havana	2	1	0.0591177	0.380062	0.570786	-0.808979	-1.75197	25.3624	44.4343	-3.13638	1.02182	0.0591148	0.380043
AC113935.1	AC113935.1	1920.28	2233.44	1594.46	2868.03	2506.5	4434.4	1	77129114	77129669	+	15557.1	4434.4	2453.24	2592.85	processed_pseudogene	ENSG00000226084	ensembl_havana	5	1	0.00205223	0.0635407	1.70613	0.770728	1.70613	3269.96	1916.59	1.21478	2.39623	0.00205167	0.0635234
AC114490.3	AC114490.3	16.5591	20.3446	6.54581	8.076	2.27661	2.12369	1	34974356	34985314	-	55.9258	20.3446	6.64514	9.32096	protein_coding	ENSG00000284773	havana	1	1	0.059692	0.381466	0.279198	-1.84064	-3.58169	4.07767	14.605	-13.5147	1.05349	0.0596891	0.381447
AC115223.1	AC115223.1	880.896	930.816	1009.98	1739.81	1257.83	963.847	4	65573459	65574329	+	6783.18	1739.81	1097.42	1130.53	processed_pseudogene	ENSG00000243199	havana	1	1	0.0388492	0.315292	1.40366	0.489198	1.40366	1319.92	940.338	1.01752	1.93635	0.0388466	0.315271
AC116347.1	AC116347.1	87.852	144.963	125.312	181.29	166.525	145.915	5	98213402	98214122	+	851.858	181.29	138.407	141.976	processed_pseudogene	ENSG00000238000	havana	1	1	0.10685	0.495585	1.37768	0.462236	1.37768	164.439	119.36	-1.07148	2.03365	0.106847	0.49557
AC116533.1	AC116533.1	1730.64	1949.99	1462.74	2498.84	2801.69	2138.3	11	16974693	16975014	-	12582.2	2801.69	2048.52	2097.03	processed_pseudogene	ENSG00000244398	havana	1	1	0.00335651	0.080826	1.44548	0.531544	1.44548	2479.47	1715.33	1.13002	1.84899	0.00335575	0.0808077
AC117464.1	AC117464.1	3.82149	7.99727	3.96101	7.59535	5.51032	59.971	3	83953639	84051420	+	88.8564	59.971	8.19925	14.8094	lncRNA	ENSG00000287158	havana_tagene	1	1	0.0402	0.319921	4.60893	2.20443	4.60893	24.4492	5.30476	1.0707	19.8396	0.0401975	0.319901
AC122688.3	AC122688.3	9.55373	7.99727	18.4847	3.25515	3.67354	4.28364	12	125138245	125141712	+	47.248	18.4847	6.45505	7.87467	TEC	ENSG00000279233	havana	1	1	0.0694218	0.409729	0.316011	-1.66195	-3.16444	3.75204	11.8731	-10.9738	1.09588	0.0694188	0.409712
AC125807.1	AC125807.1	5.73224	11.5516	14.5237	19.5309	28.47	26.5586	12	3071532	3072146	-	106.367	28.47	15.5618	17.7278	processed_pseudogene	ENSG00000234589	havana	4	1	0.0520077	0.36098	2.37677	1.249	2.37677	24.9023	10.4774	-1.00756	5.69172	0.0520049	0.360961
AC126283.2	AC126283.2	0.0168849	0.00867709	0.008277	8.37445	0.00275038	9.19057	4	109713916	109802000	-	17.6016	9.19057	0.0797211	2.9336	protein_coding	ENSG00000285330	havana	1	1	0.0492188	0.351817	29.9488	4.90443	29.9488	5.8525	0.195417	1.0117	886.563	0.0492161	0.351798
AC126755.1	AC126755.1	332.18	325.266	318.911	261.974	227.614	131.135	16	18334400	18352477	-	1597.08	332.18	254.142	266.18	transcribed_unprocessed_pseudogene	ENSG00000205746	havana	9	1	0.0225166	0.240564	0.634538	-0.656221	-1.57595	206.538	325.493	-2.32938	-1.06621	0.0225145	0.240542
AC127502.2	AC127502.2	139.484	102.187	110.908	55.3376	71.6341	87.3863	15	30487963	30490314	+	566.938	139.484	90.4506	94.4896	lncRNA	ENSG00000270055	havana	1	1	0.0255809	0.256613	0.6096	-0.714065	-1.64042	71.6759	117.579	-2.53319	-1.06229	0.0255787	0.256591
AC129492.3	AC129492.3	78.0644	47.6782	83.4361	25.7048	37.8962	23.961	17	8150816	8162976	-	296.741	83.4361	43.992	49.4568	protein_coding	ENSG00000263620	havana	1	1	0.0040747	0.0916374	0.420317	-1.25045	-2.37916	29.2058	69.4851	-4.29811	-1.31695	0.00407384	0.0916182
AC131097.2	AC131097.2	0	0	0	1.08505	3.67354	11.1375	2	241808312	241812017	-	15.8961	11.1375	0	2.64934	lncRNA	ENSG00000224272	havana	2	1	0.0305033	0.280022	27.8627	4.80027	27.8627	5.32384	0.191074	1.36755	567.683	0.030501	0.28
AC131160.1	AC131160.1	0.230724	15.5592	0.00100273	24.3423	20.5344	29.9367	3	183815568	183884890	-	90.6044	29.9367	1.94336	15.1007	protein_coding	ENSG00000283765	havana	1	1	0.0775885	0.429296	4.62248	2.20867	4.62248	24.943	5.39603	-1.18442	25.3078	0.0775854	0.429279
AC131235.2	AC131235.2	80.3439	80.7624	70.6834	139.185	123.579	85.5119	3	184149704	184150436	+	580.065	139.185	93.6499	96.6776	processed_pseudogene	ENSG00000228205	havana	1	1	0.0640415	0.394166	1.49653	0.581617	1.49653	115.851	77.4136	-1.02381	2.29291	0.0640385	0.394148
AC131571.1	AC131571.1	12.4199	20.4375	22.4457	2.1701	7.34709	7.71055	11	31618124	31767954	-	72.5308	22.4457	9.4238	12.0885	lncRNA	ENSG00000228061	havana	7	1	0.0382657	0.313012	0.316741	-1.65863	-3.15716	5.82073	18.377	-9.36688	-1.06414	0.0382631	0.312991
AC132192.2	AC132192.2	29.6166	26.6576	31.6881	16.2758	2.75516	17.9913	11	9459556	9460703	-	124.984	31.6881	16.5006	20.8307	lncRNA	ENSG00000268403	havana	2	1	0.0858142	0.448408	0.420701	-1.24913	-2.37699	12.3215	29.2881	-6.3832	1.12976	0.0858111	0.448391
AC132872.4	AC132872.4	60.5105	27.2756	69.0934	19.6137	7.66188	37.8623	17	82249067	82251845	+	222.017	69.0934	29.4232	37.0029	TEC	ENSG00000280407	ensembl_havana	2	1	0.0587689	0.378679	0.417695	-1.25948	-2.39409	21.7753	52.1321	-5.92017	1.03289	0.058766	0.37866
AC132872.5	AC132872.5	19.1075	13.3288	23.766	2.1701	8.26547	6.85382	17	82273748	82279646	+	73.4917	23.766	9.5193	12.2486	lncRNA	ENSG00000287737	havana_tagene	1	1	0.0352233	0.300868	0.313125	-1.67519	-3.19362	5.83595	18.6378	-9.4112	-1.08373	0.0352209	0.300846
AC133644.2	AC133644.2	185.533	197.992	207.549	153.075	137.472	98.5622	2	87455476	87767360	+	980.183	207.549	158.43	163.364	lncRNA	ENSG00000284879	havana	1	1	0.0199472	0.227406	0.657226	-0.605539	-1.52155	129.403	196.893	-2.16669	-1.0685	0.0199452	0.227384
AC134312.5	AC134312.5	41.081	44.4293	46.2118	157.332	103.778	36.8393	16	88177298	88186930	-	429.671	157.332	60.8438	71.6119	lncRNA	ENSG00000261327	havana	5	1	0.0260742	0.258884	2.2581	1.17511	2.2581	99.0821	43.8785	1.10193	4.62737	0.0260719	0.258861
AC135048.4	AC135048.4	118.867	115.341	145.52	87.2798	81.2262	57.6283	16	30984630	30988271	-	605.862	145.52	96.65	100.977	TEC	ENSG00000279196	havana	1	1	0.0136624	0.186502	0.595409	-0.748048	-1.67952	75.1794	126.265	-2.53605	-1.11227	0.0136608	0.186479
AC135983.3	AC135983.3	63.854	49.0366	67.3945	23.2135	15.4748	39.244	15	32519848	32536927	-	258.217	67.3945	37.9238	43.0362	transcribed_processed_pseudogene	ENSG00000223509	havana	8	1	0.0129837	0.180751	0.434667	-1.20202	-2.30061	26.0701	59.9772	-4.43939	-1.19224	0.0129821	0.180729
AC136632.1	AC136632.1	77.2636	101.131	101.115	150.885	157.549	265.437	5	178055604	178056195	+	853.38	265.437	130.702	142.23	transcribed_processed_pseudogene	ENSG00000218227	havana	3	1	0.00145338	0.0506438	2.05825	1.04142	2.05825	191.556	93.0677	1.31981	3.20984	0.00145294	0.0506283
AC137932.3	AC137932.3	32.1405	25.0314	15.6684	5.92872	8.28605	17.7143	16	89268104	89273045	+	104.77	32.1405	14.9062	17.4616	lncRNA	ENSG00000268218	havana	1	1	0.0923613	0.464079	0.440122	-1.18402	-2.2721	10.7426	24.4081	-5.90871	1.14456	0.0923582	0.464063
AC138028.4	AC138028.4	152.817	141.527	150.438	134.165	59.7398	93.9611	16	88718615	88720460	+	732.649	152.817	116.11	122.108	lncRNA	ENSG00000260121	havana	1	1	0.0680788	0.404758	0.64563	-0.63122	-1.54887	95.7004	148.228	-2.47824	1.03302	0.0680758	0.404741
AC138393.1	AC138393.1	112.551	106.384	77.6074	52.0824	37.2572	77.1055	1	223992743	224010613	+	462.988	112.551	71.9757	77.1646	transcribed_unprocessed_pseudogene	ENSG00000185495	havana	10	1	0.0319344	0.285245	0.560853	-0.834305	-1.783	55.5842	99.1065	-3.02421	-1.05121	0.031932	0.285223
AC138894.1	AC138894.1	3.21352	12.16	0.558486	15.4824	19.7806	105.418	16	28456371	28492099	-	156.613	105.418	9.43307	26.1022	protein_coding	ENSG00000261832	havana	6	1	0.0027571	0.0735716	8.59983	3.10431	8.59983	46.9847	5.46344	2.10218	35.1812	0.00275642	0.0735536
AC138932.1	AC138932.1	583.268	426.165	570.802	318.661	328.555	275.61	16	14911551	14935709	+	2503.06	583.268	399.97	417.177	transcribed_unprocessed_pseudogene	ENSG00000183458	havana	14	1	0.000182311	0.0132066	0.584256	-0.775328	-1.71158	307.477	526.271	-2.26793	-1.29171	0.000182209	0.0131992
AC139887.2	AC139887.2	35.8417	51.8932	34.3307	16.7757	8.82309	22.2506	4	760202	781860	-	169.915	51.8932	24.3858	28.3192	lncRNA	ENSG00000249592	havana	6	1	0.0146013	0.193196	0.391404	-1.35327	-2.55491	15.9733	40.8102	-5.42399	-1.20346	0.0145996	0.193173
AC144530.1	AC144530.1	4.77957	13.4124	7.54142	13.4041	16.3482	32.4061	3	197850400	197850955	-	87.8917	32.4061	12.2823	14.6486	processed_pseudogene	ENSG00000234742	havana	1	1	0.0983309	0.478508	2.40827	1.268	2.40827	20.7998	8.63681	-1.17729	6.82803	0.0983278	0.478493
AC145098.2	AC145098.2	60.1885	64.8667	114.869	46.6572	22.9596	30.8422	5	177476631	177479657	-	340.383	114.869	49.5596	56.7306	TEC	ENSG00000279821	havana	1	1	0.00657007	0.121919	0.418953	-1.25514	-2.3869	33.3425	79.5852	-4.46995	-1.27458	0.00656894	0.121898
AC147651.1	AC147651.1	8.59836	24.8804	26.4067	7.59535	2.75516	6.85382	7	520391	525239	+	77.0898	26.4067	9.65537	12.8483	lncRNA	ENSG00000223855	havana	2	1	0.0310071	0.281143	0.287157	-1.80009	-3.48241	5.71088	19.8876	-10.8209	-1.12072	0.0310048	0.281122
AC211433.1	AC211433.1	0.955373	0.888585	1.32034	3.25515	0.918386	16.2778	7	74688864	74729002	-	23.6157	16.2778	1.94741	3.93594	lncRNA	ENSG00000232729	havana	8	1	0.0897621	0.459007	6.59096	2.72049	6.59096	6.8574	1.04042	-1.33998	58.2097	0.089759	0.458991
AC232271.1	AC232271.1	30.5719	18.6603	25.0864	5.42525	7.34709	5.9971	X	49273054	49275769	+	93.088	30.5719	12.2751	15.5147	lncRNA	ENSG00000270012	havana	1	1	0.00305469	0.0773825	0.25349	-1.98	-3.94492	6.27284	24.7459	-9.7816	-1.59099	0.00305397	0.0773643
AC240565.4	AC240565.4	4.31386	9.0966	8.61921	1.11995	1.12242	2.8243	17	64099	76867	-	27.0963	9.0966	3.26022	4.51606	lncRNA	ENSG00000280279	havana	1	1	0.0856796	0.448158	0.233965	-2.09564	-4.27415	1.71398	7.3258	-22.4017	1.22626	0.0856765	0.448142
AC241952.2	AC241952.2	280.377	270.63	271.512	152.71	160.244	146.094	1	120489860	120701290	-	1281.57	280.377	204.738	213.594	transcribed_unprocessed_pseudogene	ENSG00000275131	havana	3	1	1.37904e-05	0.00195342	0.557923	-0.841862	-1.79236	152.986	274.206	-2.33174	-1.37775	1.37769e-05	0.00195149
AC242376.2	AC242376.2	72.6084	71.0868	63.3761	34.7216	45.9193	29.1288	15	23309607	23314567	+	316.841	72.6084	49.7664	52.8068	transcribed_unprocessed_pseudogene	ENSG00000274471	havana	2	1	0.0137485	0.186808	0.529051	-0.91852	-1.89018	36.575	69.1332	-3.13662	-1.13905	0.0137468	0.186785
AC242426.2	AC242426.2	0.000301717	0.00532674	0.90498	3.45756	0.173746	12.2739	1	147172755	147295735	+	16.8158	12.2739	0.1485	2.80263	lncRNA	ENSG00000237188	havana	5	1	0.0634833	0.393287	17.5534	4.13368	17.5534	5.31907	0.303023	-1.1745	361.887	0.0634804	0.393269
AC243919.1	AC243919.1	6939.79	9174.13	9721.69	12246.6	15650.6	10861.7	15	82372196	82372913	-	64594.5	15650.6	10431.6	10765.8	transcribed_processed_pseudogene	ENSG00000237550	havana	5	1	0.0042573	0.0943489	1.50029	0.585245	1.50029	12919.6	8611.4	1.136	1.98141	0.00425642	0.0943294
AC244517.5	AC244517.5	25.4775	29.3709	43.714	46.0054	33.9262	107.202	5	141046260	141096403	-	285.696	107.202	41.9798	47.6161	lncRNA	ENSG00000279047	havana	4	1	0.0920887	0.46325	1.91339	0.93613	1.91339	62.5149	32.6724	-1.11196	4.07093	0.0920855	0.463235
AC245041.2	AC245041.2	121.57	134.075	209.936	70.6414	97.3488	86.5295	10	47908064	47991878	-	720.101	209.936	112.582	120.017	lncRNA	ENSG00000276850	havana	5	1	0.00814137	0.138387	0.549617	-0.863502	-1.81945	84.9611	154.582	-2.83447	-1.16791	0.0081401	0.138365
AC246787.1	AC246787.1	37.6594	52.037	42.0673	85.0512	86.8939	69.0842	14	105978520	105979147	-	372.793	86.8939	58.9789	62.1322	processed_pseudogene	ENSG00000225200	havana	2	1	0.0120198	0.172542	1.8233	0.866554	1.8233	80.2661	44.0224	1.14102	2.91357	0.0120182	0.17252
ACADM	ACADM	557.939	598.018	508.329	781.236	764.097	592.856	1	75724347	75787576	+	3802.47	781.236	625.731	633.746	protein_coding	ENSG00000117054	ensembl_havana	14	1	0.0521699	0.36151	1.28301	0.359528	1.28301	712.37	555.235	-1.00234	1.64996	0.0521671	0.361491
ACBD7	ACBD7	229.29	167.943	179.566	157.332	140.513	115.658	10	15075475	15088777	-	990.301	229.29	161.404	165.05	protein_coding	ENSG00000176244	ensembl_havana	7	1	0.0627074	0.390331	0.715333	-0.483313	-1.39795	137.609	192.37	-1.98929	1.01792	0.0627045	0.390313
ACKR3	ACKR3	20.0628	14.2174	38.2897	4.3402	14.6942	11.1375	2	236567787	236582355	+	102.742	38.2897	14.0698	17.1236	protein_coding	ENSG00000144476	ensembl_havana	6	1	0.0956346	0.471324	0.422666	-1.24241	-2.36593	10.1346	23.9777	-6.51469	1.16383	0.0956315	0.471309
ACOT9	ACOT9	1431.14	1536.36	1613.45	972.204	1040.53	938.119	X	23701055	23766476	-	7531.8	1613.45	1224.24	1255.3	protein_coding	ENSG00000123130	ensembl_havana	17	1	2.76998e-06	0.000568053	0.644358	-0.634066	-1.55193	983.594	1526.47	-1.86502	-1.2914	2.76634e-06	0.000567307
ACP7	ACP7	195.851	226.59	257.465	103.08	177.249	35.1258	19	39083913	39111494	+	995.36	257.465	139.384	165.893	protein_coding	ENSG00000183760	ensembl_havana	11	1	0.0246198	0.251288	0.463847	-1.10828	-2.15588	105.08	226.54	-4.213	-1.10321	0.0246176	0.251265
ACSS3	ACSS3	448.046	474.385	418.547	502.167	505.559	985.988	12	80936414	81261211	+	3334.69	985.988	530.414	555.782	protein_coding	ENSG00000111058	ensembl_havana	8	1	0.0514937	0.35973	1.48713	0.572531	1.48713	664.951	447.137	-1.00258	2.21725	0.0514909	0.359711
ACTG1	ACTG1	53773.4	53751	55820.9	68015.4	70627.4	77647	17	81509971	81523848	-	379635	77647	62600.2	63272.5	protein_coding	ENSG00000184009	ensembl_havana	12	1	0.000479151	0.0256928	1.32414	0.405061	1.32414	72097.1	54448.1	1.1311	1.55014	0.000478944	0.0256817
ACTN3	ACTN3	0	0	0	31.4665	0	0	11	66546395	66563335	+	31.4665	31.4665	0	5.24441	protein_coding	ENSG00000248746	ensembl_havana	6	1	0.0465501	0.342092	54.7577	5.77499	54.7577	10.4629	0.191076	1.06306	2820.54	0.0465474	0.342072
ACTR3C	ACTR3C	8.59836	11.7109	10.5627	26.0412	20.7846	31.085	7	150243916	150323726	-	108.783	31.085	16.1729	18.1305	protein_coding	ENSG00000106526	ensembl_havana	10	1	0.025049	0.253744	2.52515	1.33637	2.52515	25.9881	10.2917	1.12304	5.67777	0.0250468	0.253722
ACVR1C	ACVR1C	69.7422	62.201	54.1338	26.0412	17.4493	15.4211	2	157526767	157628865	-	244.989	69.7422	34.36	40.8314	protein_coding	ENSG00000123612	ensembl_havana	16	1	0.000121381	0.00973962	0.313606	-1.67298	-3.18872	19.491	62.1514	-5.76018	-1.76521	0.000121306	0.00973361
ACY1	ACY1	345.484	389.836	279.303	664.913	572.693	365.419	3	51983340	51989198	+	2617.65	664.913	416.688	436.275	protein_coding	ENSG00000243989	ensembl_havana	9	1	0.0159894	0.203739	1.5767	0.656911	1.5767	533.963	338.658	1.08861	2.28364	0.0159876	0.203716
AD000671.1	AD000671.1	3.0002e-05	0.000379635	3.26253e-05	0.000189862	2.92967	37.0072	19	35745678	35754520	+	39.9375	37.0072	0.00443883	6.65625	protein_coding	ENSG00000188223	havana	9	1	0.00783	0.135949	69.816	6.12549	69.816	13.3444	0.191136	3.05448	1595.78	0.00782876	0.135928
ADAM12	ADAM12	19.1075	25.769	60.7355	6.5103	15.6126	16.2778	10	126012381	126388456	-	144.013	60.7355	19.1603	24.0021	protein_coding	ENSG00000148848	ensembl_havana	14	1	0.0379387	0.311537	0.36913	-1.4378	-2.70907	12.888	34.9144	-6.94296	-1.05705	0.0379361	0.311516
ADAMTS14	ADAMTS14	103.18	106.63	204.652	60.7628	66.1238	49.6902	10	70672506	70762442	+	591.04	204.652	87.5239	98.5066	protein_coding	ENSG00000138316	ensembl_havana	11	1	0.00130106	0.0475482	0.427655	-1.22548	-2.33833	58.8127	137.524	-3.92416	-1.39337	0.00130065	0.0475331
ADAMTS16	ADAMTS16	279.924	258.578	356.491	205.074	191.943	48.8335	5	5140330	5320305	+	1340.84	356.491	191.682	223.474	protein_coding	ENSG00000145536	ensembl_havana	15	1	0.0308231	0.281143	0.497707	-1.00663	-2.00922	148.396	298.159	-3.78506	-1.06655	0.0308207	0.281122
ADAMTS17	ADAMTS17	103.18	83.527	101.666	60.7628	64.287	62.5411	15	99971437	100342006	-	475.964	103.18	77.343	79.3273	protein_coding	ENSG00000140470	ensembl_havana	14	1	0.0355142	0.302245	0.65188	-0.617322	-1.53403	62.5542	95.9597	-2.28597	-1.02942	0.0355117	0.302224
ADAMTS6	ADAMTS6	443.292	376.761	533.415	341.791	326.027	197.048	5	65148738	65481921	-	2218.33	533.415	353.645	369.722	protein_coding	ENSG00000049192	ensembl_havana	15	1	0.0182538	0.216169	0.638997	-0.646119	-1.56495	287.98	450.674	-2.26988	-1.07895	0.0182518	0.216146
ADAMTS7	ADAMTS7	288.523	275.462	422.507	80.2937	174.493	135.347	15	78759206	78811465	-	1376.63	422.507	199.831	229.438	protein_coding	ENSG00000136378	ensembl_havana	15	1	7.46379e-05	0.00671267	0.396849	-1.33334	-2.51985	130.306	328.351	-3.98085	-1.59505	7.45862e-05	0.00670802
ADAMTS9	ADAMTS9	107.957	90.6357	72.6185	48.8272	65.2054	64.2546	3	64515654	64688001	-	449.499	107.957	72.5117	74.9164	protein_coding	ENSG00000163638	ensembl_havana	13	1	0.0686406	0.406959	0.656728	-0.606631	-1.5227	59.5678	90.7038	-2.39435	1.03267	0.0686376	0.406942
ADAMTSL4	ADAMTSL4	98.2135	85.3042	124.993	48.8272	84.4915	26.5586	1	150549369	150560938	+	468.388	124.993	69.7083	78.0647	protein_coding	ENSG00000143382	ensembl_havana	15	1	0.0415588	0.324844	0.518857	-0.94659	-1.92731	53.2556	102.64	-3.62247	-1.02541	0.0415562	0.324823
ADAP1	ADAP1	44.9025	39.9863	59.4151	13.7043	21.8208	11.9942	7	897900	955408	-	191.823	59.4151	26.944	31.9705	protein_coding	ENSG00000105963	ensembl_havana	15	1	0.00139969	0.0493669	0.330885	-1.5956	-3.0222	15.8501	47.9022	-5.95658	-1.53338	0.00139925	0.0493516
ADARB1	ADARB1	306.675	298.565	363.092	277.773	246.128	147.357	21	45073853	45226561	+	1639.59	363.092	263.527	273.265	protein_coding	ENSG00000197381	ensembl_havana	16	1	0.0611513	0.385534	0.692752	-0.52959	-1.44352	223.401	322.484	-2.11983	1.01732	0.0611484	0.385516
ADGRB3	ADGRB3	16.2413	9.77444	9.24235	1.08505	21.1229	107.091	6	68635282	69389507	+	164.557	107.091	12.3806	27.4262	protein_coding	ENSG00000135298	ensembl_havana	14	1	0.089344	0.458259	3.66829	1.87511	3.66829	43.1996	11.7765	-1.2211	16.4316	0.0893409	0.458243
ADGRG1	ADGRG1	1347.07	1607.45	1713.8	1038.39	1062.57	946.685	16	57610652	57665581	+	7715.98	1713.8	1253.34	1286	protein_coding	ENSG00000205336	ensembl_havana	13	1	0.000106379	0.00877785	0.653011	-0.614821	-1.53137	1015.74	1555.47	-1.89966	-1.23448	0.000106312	0.00877226
ADGRG2	ADGRG2	74.5191	101.299	101.666	8.6804	60.6135	65.9681	X	18989307	19122638	-	412.746	101.666	54.6489	68.7909	protein_coding	ENSG00000173698	ensembl_havana	18	1	0.0982689	0.478343	0.489698	-1.03004	-2.04208	45.2768	92.4587	-4.76056	1.1416	0.0982657	0.478328
ADGRG6	ADGRG6	681.182	682.433	639.042	653.202	494.091	382.958	6	142301854	142446267	+	3532.91	682.433	576.514	588.818	protein_coding	ENSG00000112414	ensembl_havana	15	1	0.0893155	0.458259	0.763126	-0.390006	-1.3104	509.541	667.702	-1.78994	1.04239	0.0893123	0.458243
ADGRL1	ADGRL1	632.457	514.491	646.963	887.572	798.013	849.018	19	14147743	14206188	-	4328.51	887.572	708.603	721.419	protein_coding	ENSG00000072071	ensembl_havana	16	1	0.00266166	0.0729809	1.41418	0.499967	1.41418	844.731	597.328	1.12803	1.77292	0.002661	0.0729629
ADIRF	ADIRF	603.126	1106.81	555.377	3086.53	2008.96	4147.58	10	86968432	86983935	+	11508.4	4147.58	1456.19	1918.06	protein_coding	ENSG00000148671	ensembl_havana	14	1	1.03553e-09	1.35399e-06	4.07751	2.02769	4.07751	3081.11	755.635	2.59664	6.40294	1.03175e-09	1.34905e-06
ADORA2B	ADORA2B	403.166	415.857	343.288	776.893	614.4	470.343	17	15944917	15975747	+	3023.95	776.893	484.417	503.991	protein_coding	ENSG00000170425	ensembl_havana	3	1	0.00394671	0.0900487	1.59885	0.677032	1.59885	620.062	387.818	1.16205	2.19983	0.00394587	0.0900295
ADPRHL1	ADPRHL1	332.47	240.807	289.154	221.35	213.066	149.071	13	113399610	113453525	-	1445.92	332.47	233.663	240.986	protein_coding	ENSG00000153531	ensembl_havana	13	1	0.0273551	0.265787	0.675876	-0.565169	-1.47956	194.235	287.383	-2.09538	-1.04473	0.0273528	0.265765
ADRB1	ADRB1	21.0182	23.9918	47.5321	4.3402	7.34709	5.14037	10	114043866	114046905	+	109.37	47.5321	12.5616	18.2283	protein_coding	ENSG00000043591	ensembl_havana	6	1	0.000538124	0.0270396	0.184051	-2.44182	-5.43327	5.63317	30.6066	-14.1682	-2.08357	0.000537899	0.0270283
ADTRP	ADTRP	854.099	1092.07	1181.7	428.596	747.567	311.848	6	11712054	11807047	-	4615.88	1181.7	692.337	769.313	protein_coding	ENSG00000111863	ensembl_havana	12	1	0.000779836	0.0339019	0.475821	-1.07151	-2.10163	496.002	1042.41	-3.24128	-1.36269	0.000779545	0.0338893
AEBP1	AEBP1	15.286	7.10868	7.92202	2.1701	0	5.14037	7	44104345	44114563	+	37.6271	15.286	0	6.27119	protein_coding	ENSG00000106624	ensembl_havana	11	1	0.0994854	0.480549	0.242994	-2.04101	-4.11533	2.46037	10.1252	-22.1516	1.30796	0.0994823	0.480534
AEN	AEN	351.577	513.601	476.643	347.216	393.068	210.755	15	88621337	88632282	+	2292.86	513.601	367.802	382.143	protein_coding	ENSG00000181026	ensembl_havana	15	1	0.0843862	0.445188	0.708436	-0.49729	-1.41156	316.81	447.196	-2.08791	1.04789	0.0843831	0.445172
AF117829.1	AF117829.1	105.091	133.288	118.83	59.6778	53.2664	90.8132	8	89585872	89757813	-	560.966	133.288	88.5013	93.4944	lncRNA	ENSG00000251136	havana	9	1	0.0151702	0.196715	0.571628	-0.806851	-1.74939	68.0856	119.108	-2.74744	-1.1139	0.0151685	0.196693
AF254983.1	AF254983.1	0	0	0	26.5891	0.918386	0	21	10482738	10605717	+	27.5075	26.5891	0	4.58459	lncRNA	ENSG00000273840	havana	1	1	0.0303283	0.279127	47.8144	5.57937	47.8144	9.13613	0.191075	1.44414	1583.09	0.030326	0.279105
AFF3	AFF3	1453.11	1113.39	1212.06	1415.98	1207.68	3657.43	2	99545419	100192429	-	10059.7	3657.43	1518.6	1676.61	protein_coding	ENSG00000144218	ensembl_havana	19	1	0.0534713	0.364145	1.66252	0.733375	1.66252	2094.02	1259.54	-1.00763	2.78507	0.0534685	0.364126
AFMID	AFMID	286.612	355.435	347.248	415.574	432.56	386.385	17	78187317	78207702	+	2223.81	432.56	367.34	370.636	protein_coding	ENSG00000183077	ensembl_havana	15	1	0.0811322	0.436827	1.24834	0.320012	1.24834	411.43	329.582	-1.02783	1.60172	0.0811291	0.43681
AGAP2-AS1	AGAP2-AS1	412.673	336.702	458.157	616.288	517.05	514.01	12	57726271	57728357	+	2854.88	616.288	467.404	475.813	lncRNA	ENSG00000255737	havana	2	1	0.0229012	0.242993	1.36591	0.449867	1.36591	548.825	401.8	1.04414	1.78685	0.0228991	0.24297
AGAP4	AGAP4	190.106	162.851	181.776	101.727	111.295	119.48	10	45825594	45853876	-	867.234	190.106	140.256	144.539	protein_coding	ENSG00000188234	ensembl_havana	13	1	0.00344945	0.0820053	0.623055	-0.682568	-1.60499	110.984	178.129	-2.20381	-1.16889	0.00344868	0.0819869
AGGF1P2	AGGF1P2	15.1154	7.99727	15.2452	4.31717	2.61135	2.57018	10	133640789	133642895	+	47.8565	15.2452	6.13649	7.97608	processed_pseudogene	ENSG00000233435	havana	2	1	0.0289429	0.272301	0.246293	-2.02155	-4.0602	3.13373	12.7236	-14.2759	-1.15476	0.0289406	0.272279
AGK	AGK	338.204	439.85	389.499	575.064	486.118	416.37	7	141551278	141655245	+	2645.1	575.064	434.665	440.851	protein_coding	ENSG00000006530	ensembl_havana	18	1	0.107335	0.496459	1.2642	0.338229	1.2642	492.121	389.273	-1.05223	1.68168	0.107332	0.496444
AGO2	AGO2	4291.55	3277.97	3645.45	2346.96	2927.83	3586.25	8	140520156	140635634	-	20076	4291.55	3288.09	3346	protein_coding	ENSG00000123908	ensembl_havana	12	1	0.096405	0.474021	0.790247	-0.339624	-1.26543	2954.21	3738.33	-1.67018	1.04301	0.0964018	0.474006
AGPAT5	AGPAT5	589.465	700.205	687.894	570.736	537.256	551.734	8	6708642	6761504	+	3637.29	700.205	602.918	606.215	protein_coding	ENSG00000155189	ensembl_havana	12	1	0.10737	0.49646	0.839399	-0.252571	-1.19133	553.141	658.973	-1.47429	1.03877	0.107367	0.496445
AGTRAP	AGTRAP	335.336	409.639	335.366	742.173	641.954	461.776	1	11736084	11754803	+	2926.24	742.173	465.2	487.707	protein_coding	ENSG00000177674	ensembl_havana	16	1	0.00100586	0.0403244	1.70611	0.770709	1.70611	614.874	360.396	1.24093	2.34566	0.00100551	0.0403105
AHR	AHR	4725.28	5488.69	4257.98	5811.33	5668.86	6624.65	7	16916359	17346153	+	32576.8	6624.65	5374.51	5429.46	protein_coding	ENSG00000106546	ensembl_havana	14	1	0.0387977	0.315292	1.25082	0.322878	1.25082	6035.18	4824.96	1.01159	1.54664	0.0387952	0.315271
AHSA2P	AHSA2P	498.725	524.921	473.531	373.072	277.757	355.546	2	61177418	61191204	+	2503.55	524.921	407.327	417.259	transcribed_unitary_pseudogene	ENSG00000173209	ensembl_havana	23	1	0.00273707	0.0734728	0.671439	-0.574671	-1.48934	335.275	499.339	-1.93272	-1.14767	0.0027364	0.0734549
AIG1	AIG1	295.21	348.325	319.521	590.267	476.642	544.023	6	143060496	143341059	+	2573.99	590.267	413.916	428.998	protein_coding	ENSG00000146416	ensembl_havana	19	1	4.58178e-05	0.00475641	1.67149	0.741138	1.67149	536.752	321.121	1.30565	2.13985	4.57825e-05	0.00475274
AK1	AK1	683.389	781.467	648.694	957.524	797.529	1020.72	9	127866486	127877676	-	4889.33	1020.72	803.965	814.888	protein_coding	ENSG00000106992	ensembl_havana	19	1	0.0249809	0.253357	1.31234	0.392136	1.31234	925.269	705.055	1.03475	1.66438	0.0249787	0.253334
AKAP12	AKAP12	4716.75	2719.89	4704.45	999.331	2265.63	633.978	6	151239967	151358560	+	16040	4716.75	2103.52	2673.34	protein_coding	ENSG00000131016	ensembl_havana	17	1	6.98496e-05	0.0064366	0.321158	-1.63864	-3.11373	1299.66	4046.8	-5.44988	-1.779	6.98005e-05	0.00643208
AKAP17A	AKAP17A	509.213	504.718	691.858	337.451	365.517	254.448	X	1591604	1602521	+	2663.21	691.858	421.16	443.868	protein_coding	ENSG00000197976	ensembl_havana	12	1	0.000355327	0.0214179	0.561684	-0.832169	-1.78036	318.953	567.851	-2.44337	-1.29726	0.000355161	0.0214079
AKAP8	AKAP8	886.583	784.619	978.369	712.876	587.766	430.077	19	15353385	15379799	-	4380.29	978.369	704.868	730.048	protein_coding	ENSG00000105127	ensembl_havana	9	1	0.00703168	0.125702	0.652967	-0.614918	-1.53147	576.421	882.773	-2.08792	-1.12332	0.00703051	0.125681
AKIP1	AKIP1	329.604	361.654	326.123	487.187	445.417	383.814	11	8911139	8920085	+	2333.8	487.187	384.629	388.967	protein_coding	ENSG00000166452	ensembl_havana	12	1	0.044181	0.333181	1.29192	0.369513	1.29192	438.442	339.373	1.00669	1.65795	0.0441784	0.333161
AKR1C1	AKR1C1	1344.25	1620.85	1675.16	145.471	703.475	149.927	10	4963253	4983284	+	5639.15	1675.16	618.536	939.858	protein_coding	ENSG00000187134	ensembl_havana	14	1	0.00307065	0.0774787	0.215297	-2.2156	-4.64474	333.007	1546.73	-12.838	-1.68044	0.00306993	0.0774606
AKR1C2	AKR1C2	34.3517	43.4618	53.1552	12.9637	25.7224	0	10	4987400	5018032	-	169.655	53.1552	0	28.2758	protein_coding	ENSG00000151632	ensembl_havana	17	1	0.0698868	0.410766	0.29497	-1.76136	-3.39018	12.8653	43.6158	-12.6923	1.10432	0.0698838	0.410748
AKR1C3	AKR1C3	794.872	997.89	967.805	335.263	939.511	370.964	10	5035354	5107687	+	4406.3	997.89	669.059	734.384	protein_coding	ENSG00000196139	ensembl_havana	14	1	0.0460444	0.340584	0.596348	-0.745773	-1.67687	548.727	920.145	-2.7865	-1.00912	0.0460417	0.340564
AKR7A2	AKR7A2	725.128	781.067	628.48	1264.08	1021.24	615.131	1	19303965	19312147	-	5035.13	1264.08	810.111	839.189	protein_coding	ENSG00000053371	ensembl_havana	12	1	0.106729	0.495544	1.35752	0.44097	1.35752	966.362	711.86	-1.06794	1.96806	0.106726	0.495529
AL009174.1	AL009174.1	135.805	110.05	116.721	133.684	140.584	270.503	X	133670971	133671387	+	907.346	270.503	143.871	151.224	processed_pseudogene	ENSG00000227008	havana	2	1	0.0911528	0.460587	1.50459	0.58937	1.50459	181.877	120.882	-1.06763	2.41689	0.0911497	0.460572
AL009179.1	AL009179.1	22.929	32.8777	22.4457	10.8505	14.6942	10.2807	6	27694035	27713353	+	114.078	32.8777	17.3983	19.013	lncRNA	ENSG00000281706	havana	3	1	0.0518565	0.360809	0.456351	-1.13178	-2.19129	11.9492	26.1841	-4.83217	1.00633	0.0518537	0.360789
AL022724.3	AL022724.3	108.913	130.622	147.878	16.2758	33.0619	28.272	6	11722547	11731924	+	465.022	147.878	56.3469	77.5036	lncRNA	ENSG00000287593	havana_tagene	1	1	9.66106e-10	1.35399e-06	0.202077	-2.30703	-4.94862	26.0564	128.943	-8.26157	-2.96418	9.62557e-10	1.34905e-06
AL031284.1	AL031284.1	136.537	176.934	216.002	255.435	229.654	272.248	1	25398721	25399199	+	1286.81	272.248	208.997	214.468	processed_pseudogene	ENSG00000238084	havana	4	1	0.0365525	0.307426	1.43522	0.521271	1.43522	252.468	175.909	1.02286	2.01382	0.03655	0.307405
AL031714.1	AL031714.1	68.8582	65.7507	52.8134	32.5515	39.0801	30.9892	16	1317891	1322846	-	290.043	68.8582	45.961	48.3405	lncRNA	ENSG00000261505	havana	1	1	0.0193455	0.223545	0.545843	-0.873442	-1.83203	34.2127	62.6787	-3.0428	-1.10304	0.0193435	0.223522
AL031846.2	AL031846.2	12.3303	22.3042	24.6067	5.15305	8.55909	7.88388	22	39133090	39136761	+	80.8371	24.6067	11.533	13.4729	lncRNA	ENSG00000279833	havana	1	1	0.0438534	0.332832	0.368168	-1.44156	-2.71615	7.24088	19.6674	-7.17717	-1.02791	0.0438507	0.332811
AL031847.2	AL031847.2	21.8665	3.83772	0.0265608	57.3637	23.6646	176.063	1	6159430	6197758	-	282.822	176.063	9.00361	47.1371	protein_coding	ENSG00000285629	havana	1	1	0.00128406	0.0472393	9.85102	3.30027	9.85102	85.7541	8.7051	2.44728	39.6532	0.00128365	0.0472242
AL033519.3	AL033519.3	4.77687	4.44293	3.96101	11.9356	11.939	12.8509	6	35555873	35556265	+	49.9063	12.8509	7.32083	8.31771	processed_pseudogene	ENSG00000219023	havana	1	1	0.0781162	0.43014	2.77522	1.4726	2.77522	12.2475	4.41317	-1.12172	8.63929	0.0781132	0.430123
AL033530.1	AL033530.1	0.955373	7.99727	6.60168	4.3402	9.18386	59.971	1	68679202	68943453	+	89.0493	59.971	7.02869	14.8416	lncRNA	ENSG00000285407	havana	1	1	0.0517191	0.360591	4.75869	2.25056	4.75869	24.5835	5.16603	-1.01169	22.9099	0.0517163	0.360571
AL049629.2	AL049629.2	1890.24	2139.15	2680.84	3810.1	3928.38	2688.05	11	33698261	33722468	-	17136.8	3928.38	2753.82	2856.13	protein_coding	ENSG00000284969	havana	1	1	0.00308107	0.0774787	1.55421	0.636183	1.55421	3475.21	2235.99	1.1606	2.08131	0.00308035	0.0774606
AL049840.4	AL049840.4	32.7979	38.762	26.2816	19.1802	12.5008	8.29671	14	103694516	103695051	-	137.819	38.762	20.1264	22.9699	lncRNA	ENSG00000269910	havana	1	1	0.0229861	0.243742	0.403267	-1.31019	-2.47975	13.2023	32.7383	-5.42497	-1.13349	0.022984	0.243719
AL049873.1	AL049873.1	47.7881	53.5655	14.0456	124.282	69.6187	49.6902	14	58794654	58795030	+	358.99	124.282	49.9105	59.8316	processed_pseudogene	ENSG00000213598	havana	4	1	0.0645421	0.395369	2.08804	1.06215	2.08804	81.0344	38.8088	-1.04543	4.558	0.0645391	0.39535
AL109627.1	AL109627.1	53.5009	50.6494	54.1338	107.42	67.0422	71.1084	1	16228674	16231336	-	403.855	107.42	64.957	67.3091	lncRNA	ENSG00000288398	havana	1	1	0.0741094	0.42258	1.5483	0.630688	1.5483	81.6247	52.7188	-1.04352	2.50157	0.0741063	0.422563
AL109918.1	AL109918.1	146.172	153.725	130.713	99.8246	73.4708	129.366	6	52664366	52669156	+	733.272	153.725	118.627	122.212	transcribed_unprocessed_pseudogene	ENSG00000216775	havana	3	1	0.0938292	0.467926	0.702616	-0.509192	-1.42325	100.983	143.724	-2.15072	1.06175	0.093826	0.46791
AL118506.1	AL118506.1	234.022	280.789	333.303	262.582	193.777	119.941	20	63861212	63864294	-	1424.41	333.303	226.118	237.402	lncRNA	ENSG00000268858	havana	2	1	0.085516	0.447951	0.678905	-0.558718	-1.47296	191.734	282.416	-2.29033	1.05564	0.0855129	0.447935
AL118508.2	AL118508.2	16.2413	9.77444	7.92202	1.08505	1.83677	3.42691	20	23148086	23149940	+	40.2865	16.2413	4.52543	6.71442	TEC	ENSG00000279164	havana	1	1	0.0232472	0.245896	0.189697	-2.39823	-5.27156	2.15568	11.3638	-22.1541	-1.25437	0.023245	0.245874
AL121594.1	AL121594.1	322.423	245.362	249.117	424.038	403.09	323.992	14	35122549	35317475	+	1968.02	424.038	320.87	328.004	protein_coding	ENSG00000258790	havana	1	1	0.025226	0.254778	1.40701	0.492637	1.40701	383.443	272.522	1.04333	1.89748	0.0252238	0.254756
AL121832.3	AL121832.3	43.9472	49.7608	72.6185	28.2113	24.7964	9.42401	20	62402236	62405936	-	228.758	72.6185	31.8654	38.1264	lncRNA	ENSG00000275437	havana	1	1	0.00896601	0.146516	0.374216	-1.41806	-2.67226	20.6727	55.2428	-5.58504	-1.27858	0.00896467	0.146494
AL121845.3	AL121845.3	248.509	304.147	402.677	179.326	166.376	146.795	20	63708864	63739104	+	1447.83	402.677	226.015	241.305	protein_coding	ENSG00000273154	havana	3	1	0.000200064	0.013884	0.516209	-0.953972	-1.9372	164.016	317.732	-2.74484	-1.3672	0.000199955	0.0138764
AL122020.1	AL122020.1	340.113	396.309	367.053	671.646	711.428	488.434	14	90766531	90766990	+	2974.98	711.428	475.42	495.83	processed_pseudogene	ENSG00000213315	havana	5	1	0.000299003	0.0187568	1.69497	0.761259	1.69497	623.557	367.887	1.27338	2.25613	0.000298856	0.0187476
AL133243.2	AL133243.2	9.55373	9.77444	26.4067	5.42525	5.51032	0	2	32521927	32523548	+	56.6705	26.4067	0	9.44508	lncRNA	ENSG00000276334	havana	1	1	0.0677014	0.403652	0.237835	-2.07197	-4.2046	3.59803	15.1283	-19.6267	1.11019	0.0676984	0.403634
AL133367.1	AL133367.1	30.5719	39.0977	40.9304	16.2758	22.0413	21.4182	14	103525010	103529073	-	170.335	40.9304	26.8646	28.3892	lncRNA	ENSG00000260285	havana	1	1	0.0627359	0.390331	0.543041	-0.880868	-1.84148	19.9786	36.7902	-3.5029	1.03298	0.062733	0.390313
AL136169.1	AL136169.1	40.1257	28.4347	50.1728	13.0206	5.51032	4.28364	X	135037281	135040356	+	141.548	50.1728	16.1272	23.5913	lncRNA	ENSG00000286964	havana_tagene	1	1	0.000232945	0.0155278	0.189445	-2.40015	-5.27858	7.46924	39.427	-12.8023	-2.17645	0.000232822	0.0155197
AL136295.1	AL136295.1	108.089	165.697	211.627	296.832	219.472	233.866	14	24189157	24213474	-	1235.58	296.832	196.602	205.931	protein_coding	ENSG00000254692	havana	1	1	0.0384355	0.313393	1.54943	0.631735	1.54943	249.879	161.272	1.02359	2.3454	0.038433	0.313372
AL136982.1	AL136982.1	1.41701e-15	6.90994e-11	1.82922e-11	2.03488	12.1857	1.07867e-14	10	86992406	87010204	+	14.2205	12.1857	8.84569e-09	2.37009	lncRNA	ENSG00000151303	havana	11	1	0.0981793	0.478343	24.8197	4.63341	24.8197	4.74242	0.191075	-1.81249	1116.52	0.0981761	0.478328
AL136985.3	AL136985.3	108.913	117.293	114.869	57.5077	47.7561	111.375	1	58715609	58771296	+	557.713	117.293	87.5016	92.9522	lncRNA	ENSG00000283445	havana	1	1	0.0967503	0.47517	0.636944	-0.650762	-1.57	72.4121	113.687	-2.67352	1.08464	0.0967472	0.475154
AL137782.1	AL137782.1	29.0465	22.4195	24.1155	6.41359	10.4182	15.0051	13	75549773	75807121	+	107.418	29.0465	15.8316	17.9031	lncRNA	ENSG00000261553	havana	5	1	0.0474152	0.344576	0.424976	-1.23455	-2.35308	10.7109	25.2037	-5.48319	-1.00981	0.0474125	0.344556
AL138752.2	AL138752.2	65.3675	78.1614	41.6099	9.0157	38.7023	31.5946	9	37588413	38068688	-	264.451	78.1614	36.446	44.0752	protein_coding	ENSG00000255872	havana	3	1	0.0363833	0.306767	0.429609	-1.2189	-2.3277	26.5948	61.9046	-5.13562	-1.05502	0.0363807	0.306746
AL139095.2	AL139095.2	42.3669	55.3032	64.0045	114.88	103.548	73.3617	6	7338839	7339569	-	453.464	114.88	71.2536	75.5774	processed_pseudogene	ENSG00000220472	havana	1	1	0.0156923	0.200857	1.80912	0.855288	1.80912	97.0865	53.6651	1.11841	2.92641	0.0156905	0.200834
AL139300.1	AL139300.1	200.589	253.696	235.376	293.346	288.637	385.409	14	103562962	103685925	+	1657.05	385.409	270.4	276.176	protein_coding	ENSG00000256500	havana	6	1	0.0296406	0.275921	1.40388	0.489423	1.40388	322.717	229.874	1.03409	1.90592	0.0296383	0.275899
AL157392.3	AL157392.3	168.244	106.96	128.572	80.7586	103.966	86.3939	10	13631143	13668446	+	674.894	168.244	109.013	112.482	lncRNA	ENSG00000239665	havana	8	1	0.0577113	0.377009	0.671951	-0.573572	-1.4882	90.4457	134.602	-2.24374	1.01309	0.0577084	0.37699
AL158071.3	AL158071.3	12.4198	15.9945	17.1644	2.1701	7.34709	4.28364	9	91104327	91213047	-	59.3796	17.1644	7.84369	9.8966	lncRNA	ENSG00000230537	havana_tagene	2	1	0.042065	0.327541	0.306477	-1.70615	-3.26289	4.64638	15.1606	-10.2043	-1.04333	0.0420624	0.32752
AL158201.1	AL158201.1	15.286	16.8831	11.883	3.25515	8.26547	5.14037	X	68070520	68071768	-	60.7131	16.8831	8.66797	10.1189	processed_pseudogene	ENSG00000228328	havana	2	1	0.0806827	0.43621	0.379313	-1.39854	-2.63635	5.59367	14.7469	-7.82344	1.12562	0.0806796	0.436193
AL158214.2	AL158214.2	2.63657	3.11408	1.54502	9.67394	11.3669	7.47281	1	230692533	230696889	-	35.8094	11.3669	4.67382	5.96823	lncRNA	ENSG00000286859	havana_tagene	1	1	0.061276	0.385534	3.8251	1.9355	3.8251	9.49561	2.48245	-1.06547	15.5893	0.0612731	0.385516
AL158801.6	AL158801.6	76.4215	70.0009	124.4	69.7234	44.9754	59.7527	14	55229217	55229682	+	445.274	124.4	70.6819	74.2123	processed_pseudogene	ENSG00000279392	ensembl_havana	1	1	0.100579	0.482677	0.646601	-0.629053	-1.54655	58.055	89.785	-2.6025	1.08808	0.100576	0.482662
AL160272.2	AL160272.2	13.9555	9.55234	13.7666	14.5878	32.4284	42.9318	9	117704157	118072315	+	127.222	42.9318	18.2766	21.2037	protein_coding	ENSG00000285082	havana	2	1	0.0468365	0.343334	2.43487	1.28384	2.43487	30.1178	12.3693	1.01253	5.85523	0.0468338	0.343314
AL161431.1	AL161431.1	1730.18	1016.54	1300.53	522.994	507.867	302.425	13	109269634	109278513	+	5380.54	1730.18	753.992	896.757	lncRNA	ENSG00000275216	havana	2	1	1.42343e-08	1.15217e-05	0.329226	-1.60285	-3.03742	444.147	1349.06	-4.4593	-2.06892	1.41953e-08	1.14901e-05
AL162258.1	AL162258.1	3.87427	7.17841	2.64067	14.3745	14.0318	12.925	1	153626332	153634341	-	55.0247	14.3745	7.5918	9.17078	lncRNA	ENSG00000271853	havana	5	1	0.0646502	0.395492	2.95019	1.56081	2.95019	13.7687	4.66705	-1.06796	9.29515	0.0646473	0.395474
AL162417.1	AL162417.1	0.00275779	0.266218	0.00014973	6.52206	0.000432429	22.0812	9	133098121	133163915	-	28.8728	22.0812	0.0435751	4.81214	protein_coding	ENSG00000285245	havana	1	1	0.0146407	0.193386	40.8595	5.3526	40.8595	9.55224	0.233783	2.07785	803.474	0.014639	0.193364
AL162458.1	AL162458.1	120.377	103.076	122.791	56.4226	48.6744	24.8451	20	45926518	45935056	-	476.186	122.791	68.5715	79.3644	lncRNA	ENSG00000285796	havana	1	1	0.00024034	0.0158961	0.373672	-1.42016	-2.67615	43.0899	115.315	-4.52554	-1.58252	0.000240215	0.0158878
AL163636.2	AL163636.2	72.372	33.0347	126.828	11.2939	1.30947	45.5431	14	20684587	20700577	+	290.381	126.828	24.2672	48.3968	protein_coding	ENSG00000259171	havana	1	1	0.0302967	0.279123	0.251928	-1.98892	-3.96939	19.4635	77.2581	-13.818	-1.14025	0.0302943	0.279102
AL353807.5	AL353807.5	66.8761	74.6412	99.0252	50.9974	38.5722	36.8393	1	155626757	155637605	-	366.951	99.0252	57.4145	61.1586	lncRNA	ENSG00000287839	havana_tagene	1	1	0.0109084	0.162936	0.525901	-0.927137	-1.9015	41.9955	79.8545	-3.11875	-1.15934	0.0109069	0.162913
AL354714.2	AL354714.2	971.084	911.904	927.231	602.59	696.921	579.413	1	160894980	160896077	+	4689.14	971.084	764.595	781.524	processed_pseudogene	ENSG00000213080	havana	3	1	0.000136486	0.0106912	0.668611	-0.580761	-1.49564	626.339	936.777	-1.83931	-1.21618	0.000136404	0.0106848
AL354733.2	AL354733.2	15.286	7.10868	3.96101	2.1701	0.918386	0.856728	9	83831586	83868533	+	30.3009	15.286	3.00404	5.05015	lncRNA	ENSG00000231616	havana	9	1	0.0310047	0.281143	0.145334	-2.78256	-6.88071	1.28667	8.8532	-39.6958	-1.19267	0.0310023	0.281122
AL355312.4	AL355312.4	24.8397	22.6843	14.9035	33.6366	47.7561	47.12	6	149852462	149853193	+	190.94	47.7561	29.3225	31.8234	lncRNA	ENSG00000273132	havana	1	1	0.0302669	0.279001	2.04375	1.03122	2.04375	42.93	21.0055	1.07054	3.90167	0.0302646	0.278979
AL357079.1	AL357079.1	10.5091	6.2201	22.4457	2.1701	1.83677	0	1	43937918	43940782	-	43.1818	22.4457	0	7.19696	lncRNA	ENSG00000237950	havana_tagene	3	1	0.00828486	0.139294	0.100261	-3.31817	-9.97402	1.29703	12.9366	-55.0009	-1.80872	0.00828357	0.139272
AL358472.2	AL358472.2	5.73224	9.77444	15.844	2.1701	2.75516	5.14037	1	153977743	153979161	+	41.4163	15.844	5.48677	6.90272	lncRNA	ENSG00000272654	havana	1	1	0.107821	0.497486	0.327748	-1.60934	-3.05113	3.39225	10.3502	-11.8833	1.27649	0.107818	0.497471
AL358777.3	AL358777.3	23.8843	23.9918	34.3287	11.9356	3.67354	10.2807	6	10659498	10692861	+	108.095	34.3287	14.3868	18.0158	lncRNA	ENSG00000285763	havana	1	1	0.0134271	0.184506	0.314581	-1.6685	-3.17883	8.58437	27.2883	-7.95167	-1.2708	0.0134255	0.184484
AL359764.2	AL359764.2	6.68761	7.10868	19.805	1.08505	0.918386	0	1	241413716	241468662	+	35.6048	19.805	0	5.93413	lncRNA	ENSG00000287516	havana	1	1	0.00529843	0.107473	0.0579714	-4.10852	-17.2499	0.642596	11.0847	-127.686	-2.3304	0.00529742	0.107453
AL365181.3	AL365181.3	8.59836	7.99727	11.883	17.3608	11.939	34.2691	1	156641666	156644888	-	92.0476	34.2691	13.4056	15.3413	lncRNA	ENSG00000272405	havana	1	1	0.104312	0.490484	2.25843	1.17532	2.25843	21.2557	9.41173	-1.18336	6.03574	0.104309	0.49047
AL390728.4	AL390728.4	516.857	403.418	543.978	361.322	235.107	333.267	1	247189851	247210857	-	2393.95	543.978	384.099	398.991	transcribed_unprocessed_pseudogene	ENSG00000227671	havana	4	1	0.00648998	0.121348	0.635119	-0.6549	-1.57451	309.719	487.654	-2.18323	-1.13551	0.00648885	0.121327
AL390728.6	AL390728.6	189.164	150.171	167.683	96.5695	86.3283	113.945	1	247187281	247188527	-	803.86	189.164	128.608	133.977	lncRNA	ENSG00000259865	havana	1	1	0.0029208	0.0756564	0.586122	-0.770727	-1.70613	99.0375	168.971	-2.42557	-1.20008	0.0029201	0.0756383
AL391058.1	AL391058.1	99.9678	97.8583	152.815	73.7004	46.703	30.236	1	113449700	113450729	+	501.28	152.815	73.3377	83.5467	processed_pseudogene	ENSG00000232499	havana	2	1	0.00373871	0.0864633	0.428633	-1.22218	-2.333	49.9567	116.549	-4.13634	-1.31587	0.00373789	0.0864445
AL391244.2	AL391244.2	60.1885	27.5461	56.7744	29.2964	21.1229	28.272	1	1409096	1410619	+	223.2	60.1885	34.3644	37.2001	lncRNA	ENSG00000272455	havana	1	1	0.0781141	0.43014	0.546097	-0.872771	-1.83118	26.2048	47.9855	-3.58941	1.07044	0.0781111	0.430123
AL391684.1	AL391684.1	51.5901	58.6466	43.5711	36.8917	13.7758	12.8509	10	99430919	99463260	+	217.326	58.6466	30.8436	36.221	lncRNA	ENSG00000224934	havana	5	1	0.0197663	0.226409	0.40807	-1.29311	-2.45056	20.9628	51.3706	-5.20719	-1.15326	0.0197643	0.226386
AL441992.2	AL441992.2	80.2513	105.742	80.5405	125.866	135.003	110.518	9	128724445	128733195	+	637.92	135.003	104.248	106.32	lncRNA	ENSG00000223478	havana	1	1	0.0902649	0.459586	1.38862	0.473647	1.38862	123.737	89.1083	-1.0529	2.03025	0.0902618	0.45957
AL441992.3	AL441992.3	72.6876	66.4676	42.6855	7.89728	27.3962	0.407857	9	128819663	128881932	-	217.542	72.6876	16.2183	36.257	protein_coding	ENSG00000286112	havana	1	1	0.00904382	0.146551	0.196065	-2.3506	-5.10036	11.8976	60.682	-17.3335	-1.50078	0.00904248	0.14653
AL450405.1	AL450405.1	647.167	740.874	687.38	1020.41	1257.58	917.442	6	117998975	117999449	+	5270.86	1257.58	854.033	878.476	processed_pseudogene	ENSG00000230202	havana	1	1	0.000605004	0.0294666	1.5394	0.622371	1.5394	1065.12	691.906	1.20303	1.96982	0.00060476	0.0294547
AL512625.3	AL512625.3	48.724	27.5461	30.3677	7.59535	23.878	1.71346	9	62801534	62802700	-	139.825	48.724	15.2677	23.3041	lncRNA	ENSG00000287168	havana_tagene	1	1	0.0466142	0.342119	0.310956	-1.68522	-3.21588	11.0612	35.5714	-10.1624	-1.01766	0.0466115	0.342099
AL513477.1	AL513477.1	21.9736	25.769	9.24235	58.5927	23.878	51.4037	1	2350414	2352821	-	190.859	58.5927	26.8701	31.8099	transcribed_processed_pseudogene	ENSG00000269896	havana	2	1	0.0437471	0.332811	2.31633	1.21184	2.31633	44.567	19.2404	1.02383	5.24048	0.0437444	0.332791
AL590560.3	AL590560.3	71.653	89.7471	100.346	58.5927	23.878	32.5557	1	159854870	159867686	+	376.772	100.346	55.5525	62.7953	lncRNA	ENSG00000272668	havana	2	1	0.00627828	0.11884	0.437557	-1.19246	-2.28541	38.1181	87.1157	-4.13433	-1.26335	0.00627718	0.118819
AL590681.1	AL590681.1	26.7504	16.8831	1.32034	58.5927	47.7561	156.781	13	83996173	83997598	+	308.084	156.781	25.2894	51.3473	lncRNA	ENSG00000286284	havana_tagene	1	1	0.00130353	0.0475482	5.76999	2.52857	5.76999	87.793	15.2154	1.98233	16.7948	0.00130312	0.0475331
AL590867.2	AL590867.2	4235.77	5428.09	6308.58	10988.7	9542.36	7715.87	6	153282287	153282734	-	44219.4	10988.7	6997.07	7369.89	processed_pseudogene	ENSG00000218426	havana	5	1	8.34757e-05	0.00731402	1.76863	0.822636	1.76863	9415.23	5323.45	1.33129	2.34966	8.34194e-05	0.00730909
AL591806.4	AL591806.4	0.457479	3.10879	1.7138	0.841237	23.1224	38.1038	1	160997957	161038963	-	67.3475	38.1038	3.48985	11.2246	protein_coding	ENSG00000270149	havana	5	1	0.00816711	0.138686	11.7028	3.54879	11.7028	20.7575	1.77372	1.89108	72.4221	0.00816583	0.138664
AL592437.2	AL592437.2	26.7504	21.326	27.7976	10.8505	11.0736	12.0952	9	105758164	105760756	+	109.893	27.7976	16.8694	18.3156	processed_pseudogene	ENSG00000232486	havana	1	1	0.0433708	0.331565	0.450231	-1.15126	-2.22108	11.3544	25.2191	-4.81735	-1.02405	0.0433682	0.331544
AL627402.1	AL627402.1	331.866	410.858	292.612	413.907	437.665	753.867	X	41675760	41676495	-	2640.78	753.867	419.483	440.129	processed_pseudogene	ENSG00000217624	havana	2	1	0.0284651	0.27063	1.54999	0.632262	1.54999	535.499	345.485	1.04726	2.29405	0.0284628	0.270608
AL662899.4	AL662899.4	398.944	191.908	284.858	133.299	107.476	200.677	6	31666102	31673547	+	1317.16	398.944	199.317	219.527	protein_coding	ENSG00000263020	havana	6	1	0.00577543	0.11323	0.504665	-0.986601	-1.98151	147.287	291.851	-3.22019	-1.2193	0.00577438	0.11321
AL669831.1	AL669831.1	326.162	313.885	386.49	302.89	235.099	225.093	1	725885	778627	-	1789.62	386.49	293.116	298.27	transcribed_unprocessed_pseudogene	ENSG00000228327	havana	3	1	0.0488475	0.350194	0.743381	-0.427825	-1.3452	253.985	341.661	-1.80686	-1.0015	0.0488448	0.350174
AL671762.1	AL671762.1	0.0113171	0.00230831	8.64021e-05	0.000139861	3.65219	20.2241	6	31828834	31839720	+	23.8901	20.2241	0.0169023	3.98169	lncRNA	ENSG00000285565	havana	1	1	0.0270396	0.263997	41.3876	5.37113	41.3876	7.98497	0.192932	1.52597	1122.52	0.0270374	0.263975
AL807752.5	AL807752.5	0	0	0	2.1701	0	11.1375	9	136937169	136937989	-	13.3076	11.1375	0	2.21793	lncRNA	ENSG00000260190	havana	1	1	0.10843	0.499482	23.2787	4.54094	23.2787	4.44798	0.191075	-2.00457	1086.27	0.108427	0.499468
ALCAM	ALCAM	5729.59	5664.67	5574.32	4461.79	4754.29	4908.21	3	105366909	105576901	+	31092.9	5729.59	5158.24	5182.14	protein_coding	ENSG00000170017	ensembl_havana	12	1	0.017977	0.214739	0.832424	-0.26461	-1.20131	4708.51	5656.39	-1.39842	-1.03198	0.0179751	0.214716
ALDH3B1	ALDH3B1	347.756	429.187	386.858	528.418	528.072	454.923	11	68008578	68029283	+	2675.21	528.418	440.738	445.869	protein_coding	ENSG00000006534	ensembl_havana	16	1	0.0363385	0.306542	1.29776	0.376029	1.29776	503.598	388.051	1.01672	1.6565	0.036336	0.30652
ALDH4A1	ALDH4A1	89.805	71.0868	95.0642	237.626	173.575	67.6815	1	18871430	18902725	-	734.838	237.626	109.184	122.473	protein_coding	ENSG00000159423	ensembl_havana	17	1	0.0468402	0.343334	1.87035	0.903305	1.87035	159.36	85.2033	1.00879	3.46772	0.0468375	0.343314
ALG1	ALG1	279.73	325.756	357.467	424.797	356.747	418.281	16	5033923	5087380	+	2162.78	424.797	356.845	360.463	protein_coding	ENSG00000033011	ensembl_havana	13	1	0.0997494	0.480644	1.24757	0.319115	1.24757	399.849	320.504	-1.04308	1.62347	0.0997463	0.480629
ALG11	ALG11	430.89	436.189	525.038	591.778	594.183	647.944	13	52012398	52033601	+	3226.02	647.944	531.261	537.67	protein_coding	ENSG00000253710	ensembl_havana	4	1	0.017226	0.211109	1.32002	0.400561	1.32002	611.452	463.214	1.05041	1.65884	0.0172242	0.211086
ALG14	ALG14	76.4299	89.7471	69.9778	120.441	126.737	187.623	1	94974405	95072952	-	670.956	187.623	105.447	111.826	protein_coding	ENSG00000172339	ensembl_havana	10	1	0.00469963	0.0996065	1.8389	0.878843	1.8389	145.166	78.9419	1.20542	2.8053	0.0046987	0.0995867
ALG3	ALG3	514.946	629.119	624.519	764.96	866.039	618.559	3	184242301	184249549	-	4018.14	866.039	660.338	669.69	protein_coding	ENSG00000214160	ensembl_havana	10	1	0.0794049	0.433139	1.27209	0.347205	1.27209	749.683	589.33	-1.02864	1.66457	0.0794018	0.433122
ALPK1	ALPK1	101.27	84.4156	113.549	143.227	140.513	155.068	4	112285509	112442622	+	738.041	155.068	120.289	123.007	protein_coding	ENSG00000073331	ensembl_havana	18	1	0.0292894	0.274364	1.47293	0.558689	1.47293	146.322	99.3408	1.03979	2.0865	0.0292871	0.274342
ALS2CL	ALS2CL	261.772	193.712	242.942	161.672	93.6754	126.796	3	46668995	46693705	-	1080.57	261.772	169.43	180.095	protein_coding	ENSG00000178038	ensembl_havana	17	1	0.00243629	0.069615	0.546468	-0.87179	-1.82993	127.137	232.653	-2.70474	-1.23807	0.00243567	0.0695972
ALYREF	ALYREF	721.307	886.808	971.767	1091.56	1024.92	1062.34	17	81887835	81891587	-	5758.71	1091.56	950.792	959.784	protein_coding	ENSG00000183684	ensembl_havana	8	1	0.0737079	0.420997	1.2331	0.302291	1.2331	1059.53	859.239	-1.0203	1.55141	0.0737049	0.42098
AMER1	AMER1	244.576	247.915	225.777	123.696	175.412	110.518	X	64185117	64205709	-	1127.89	247.915	178.94	187.982	protein_coding	ENSG00000184675	ensembl_havana	11	1	0.00179018	0.0579608	0.570009	-0.810944	-1.75436	136.565	239.584	-2.49645	-1.23286	0.00178967	0.0579442
AMIGO1	AMIGO1	144.261	199.043	188.808	235.456	261.74	233.03	1	109504178	109509739	-	1262.34	261.74	206.642	210.39	protein_coding	ENSG00000181754	ensembl_havana	7	1	0.0443278	0.333674	1.37343	0.457783	1.37343	243.433	177.245	1.00808	1.87119	0.0443252	0.333654
AMPD3	AMPD3	708.887	591.796	617.918	234.371	407.763	383.814	11	10308313	10507580	+	2944.55	708.887	460.277	490.758	protein_coding	ENSG00000133805	ensembl_havana	15	1	0.000304277	0.0188763	0.535376	-0.901376	-1.86785	342.42	639.588	-2.62174	-1.33074	0.000304128	0.0188671
AMT	AMT	89.2793	128.862	105.535	46.9482	48.5836	55.0034	3	49416778	49422686	-	474.211	128.862	73.0794	79.0352	protein_coding	ENSG00000145020	ensembl_havana	16	1	0.000540499	0.0270396	0.465293	-1.10379	-2.14918	50.2492	107.995	-3.31512	-1.39331	0.000540274	0.0270283
AMYH02020865.1	AMYH02020865.1	6.47162	25.5639	3.96931	4.60615e-10	4.69242	0	9	40497850	40566780	+	40.6972	25.5639	0	6.78287	transcribed_unprocessed_pseudogene	ENSG00000184906	havana	11	1	0.0621223	0.388709	0.130887	-2.9336	-7.64015	1.57991	12.0708	-64.7086	1.10856	0.0621193	0.38869
ANAPC11	ANAPC11	1019.38	1192.48	1130.21	1622.15	1743.09	998.089	17	81890790	81900992	+	7705.4	1743.09	1253.39	1284.23	protein_coding	ENSG00000141552	ensembl_havana	17	1	0.10276	0.486686	1.30529	0.384375	1.30529	1454.12	1114.02	-1.05508	1.79764	0.102757	0.486671
ANAPC13	ANAPC13	525.57	522.231	455.034	670.274	845.566	658.949	3	134477706	134486717	-	3677.62	845.566	599.973	612.937	protein_coding	ENSG00000129055	ensembl_havana	12	1	0.00351975	0.082778	1.4459	0.531967	1.4459	725.026	501.436	1.12872	1.8522	0.00351897	0.0827595
ANAPC7	ANAPC7	1121.6	1223.58	1170.86	1559.16	1395.08	1672.1	12	110372900	110403731	-	8142.39	1672.1	1342.11	1357.06	protein_coding	ENSG00000196510	ensembl_havana	12	1	0.00544297	0.109234	1.31576	0.3959	1.31576	1542.19	1172.09	1.08428	1.59666	0.00544195	0.109214
ANGPTL2	ANGPTL2	723.215	623.787	726.185	279.943	337.966	532.886	9	127087348	127122636	-	3223.98	726.185	504.647	537.33	protein_coding	ENSG00000136859	ensembl_havana	10	1	0.0014611	0.0507811	0.555862	-0.847201	-1.79901	384.044	690.897	-2.58288	-1.25303	0.00146066	0.0507656
ANK3	ANK3	337.927	283.459	427.789	199.697	281.026	265.418	10	60026298	60733491	-	1795.31	427.789	291.249	299.219	protein_coding	ENSG00000151150	ensembl_havana	22	1	0.0514304	0.35973	0.713363	-0.487291	-1.40181	248.982	349.026	-1.9692	1.0021	0.0514276	0.359711
ANKDD1B	ANKDD1B	0	1.77717	0	4.3402	3.67354	8.56728	5	75611182	75681774	+	18.3582	8.56728	0	3.0597	protein_coding	ENSG00000189045	ensembl_havana	14	1	0.0835941	0.443251	8.61594	3.10701	8.61594	5.54141	0.643158	-1.33108	98.8122	0.083591	0.443234
ANKEF1	ANKEF1	125.154	161.722	138.635	161.673	190.106	238.17	20	9986126	10058304	+	1015.46	238.17	165.489	169.243	protein_coding	ENSG00000132623	ensembl_havana	16	1	0.0715726	0.415256	1.38738	0.472359	1.38738	196.943	141.954	-1.02915	1.98093	0.0715696	0.415239
ANKH	ANKH	1850.56	1886.46	1808.86	1954.17	2251.88	4409.59	5	14704800	14871779	-	14161.5	4409.59	2228.66	2360.26	protein_coding	ENSG00000154122	ensembl_havana	14	1	0.0315763	0.283088	1.55373	0.635735	1.55373	2872.34	1848.68	1.03967	2.32197	0.031574	0.283067
ANKHD1	ANKHD1	1409.53	1515.68	1300.87	1109.68	1165.11	1053.76	5	140401814	140539857	+	7554.63	1515.68	1248.45	1259.11	protein_coding	ENSG00000131503	ensembl_havana	21	1	0.0131755	0.182169	0.787128	-0.34533	-1.27044	1109.44	1409.48	-1.53513	-1.05139	0.0131739	0.182147
ANKHD1-EIF4EBP3	ANKHD1-EIF4EBP3	488.324	536.914	420.802	609.045	431.748	1016.96	5	140401908	140549570	+	3503.79	1016.96	555.877	583.965	protein_coding	ENSG00000254996	ensembl_havana	5	1	0.104655	0.491055	1.42276	0.50869	1.42276	686.146	482.265	-1.07604	2.17816	0.104651	0.491041
ANKLE1	ANKLE1	72.6083	45.3175	72.6171	33.6365	25.5811	21.1928	19	17281645	17287647	+	270.953	72.6171	40.4143	45.1589	protein_coding	ENSG00000160117	ensembl_havana	16	1	0.00408643	0.0916374	0.421267	-1.24719	-2.37379	26.6774	63.3266	-4.28261	-1.31576	0.00408557	0.0916182
ANKRD11	ANKRD11	3307.19	2780.62	2873.66	2133.56	1986.65	2767.03	16	89267630	89490562	-	15848.7	3307.19	2601.43	2641.45	protein_coding	ENSG00000167522	ensembl_havana	16	1	0.0359413	0.304399	0.768621	-0.379656	-1.30103	2296.09	2987.29	-1.66371	-1.01742	0.0359388	0.304378
ANKRD13B	ANKRD13B	330.559	289.679	355.171	244.136	288.374	233.03	17	29589769	29614762	+	1740.95	355.171	286.924	290.158	protein_coding	ENSG00000198720	ensembl_havana	13	1	0.0854085	0.447664	0.786022	-0.347357	-1.27223	255.199	324.671	-1.67382	1.03414	0.0854054	0.447648
ANKRD18EP	ANKRD18EP	267.504	191.934	209.933	131.291	135.921	203.045	6	39110321	39112953	+	1139.63	267.504	184.196	189.938	processed_pseudogene	ENSG00000217165	havana	1	1	0.0725276	0.417623	0.703476	-0.507427	-1.42151	157.011	223.193	-2.08673	1.03268	0.0725245	0.417606
ANKRD20A1	ANKRD20A1	30.868	26.0662	17.2861	15.4609	6.61194	14.4439	9	67832765	67920553	+	110.737	30.868	16.5484	18.4562	protein_coding	ENSG00000260691	ensembl_havana	6	1	0.106555	0.495004	0.488023	-1.03498	-2.04908	12.1383	24.8723	-4.89705	1.16631	0.106552	0.494989
ANKRD20A2P	ANKRD20A2P	12.6517	10.0334	7.38613	1.56793	2.70892	2.49894	9	40223285	40266846	+	36.847	12.6517	4.63784	6.14117	protein_coding	ENSG00000183148	ensembl_havana	7	1	0.0374423	0.311068	0.226164	-2.14456	-4.42157	2.27851	10.0746	-17.9321	-1.09024	0.0374398	0.311047
ANKRD20A5P	ANKRD20A5P	30.0006	12.0534	30.0375	6.60997	11.369	5.14037	18	14179097	14252141	+	95.2108	30.0375	12.7	15.8685	transcribed_unprocessed_pseudogene	ENSG00000186481	havana	16	1	0.0266249	0.262208	0.322331	-1.63339	-3.10241	7.70774	23.9125	-8.44101	-1.14026	0.0266227	0.262185
ANKRD27	ANKRD27	772.896	923.455	757.873	1018.93	902.774	1046.92	19	32597006	32676598	-	5422.85	1046.92	897.006	903.809	protein_coding	ENSG00000105186	ensembl_havana	16	1	0.0920317	0.463101	1.20866	0.273412	1.20866	989.52	818.689	-1.03144	1.5068	0.0920286	0.463085
ANKRD36	ANKRD36	166.025	161.952	168.518	107.729	110.287	52.9912	2	97113153	97264522	+	767.502	168.518	119.091	127.917	protein_coding	ENSG00000135976	ensembl_havana	20	1	0.0100919	0.154682	0.544594	-0.876746	-1.83623	90.1115	165.465	-2.9174	-1.15573	0.0100905	0.15466
ANKRD36BP1	ANKRD36BP1	0.0136088	6.39924e-05	6.3184e-07	0.00540651	0.0015901	27.6089	1	168245565	168247344	-	27.6296	27.6089	0.00225246	4.60493	transcribed_processed_pseudogene	ENSG00000214262	havana	4	1	0.0577769	0.377293	47.8124	5.57931	47.8124	9.22341	0.192909	-1.13604	2597.01	0.0577741	0.377274
ANKRD46	ANKRD46	265.492	299.854	233.577	372.767	376.23	466.762	8	100509752	100559785	-	2014.68	466.762	326.761	335.781	protein_coding	ENSG00000186106	ensembl_havana	11	1	0.00348519	0.0823939	1.51953	0.603624	1.51953	405.506	266.863	1.14762	2.01195	0.00348441	0.0823755
ANKS1A	ANKS1A	1755.98	1512.37	1427.29	1242.38	1351.86	1243.97	6	34889255	35091407	+	8533.84	1755.98	1411.82	1422.31	protein_coding	ENSG00000064999	ensembl_havana	15	1	0.049952	0.355056	0.817116	-0.291387	-1.22382	1279.47	1565.83	-1.49766	-1.00004	0.0499492	0.355037
ANLN	ANLN	5249.7	4973.39	4164.33	4682.1	3721.27	2935.09	7	36389821	36453792	+	25725.9	5249.7	4209.02	4287.65	protein_coding	ENSG00000011426	ensembl_havana	11	1	0.098686	0.479184	0.787874	-0.343963	-1.26924	3778.92	4796.35	-1.6844	1.04558	0.0986829	0.479168
ANO9	ANO9	23.8843	14.2174	48.8524	6.5103	3.67354	7.71055	11	417933	442012	-	104.849	48.8524	12.0485	17.4748	protein_coding	ENSG00000185101	ensembl_havana	13	1	0.00322075	0.0789991	0.207742	-2.26713	-4.81366	5.96761	28.7261	-13.6944	-1.69203	0.00322001	0.0789809
ANOS1	ANOS1	787.227	515.379	545.299	415.574	403.171	346.975	X	8528874	8732138	-	3013.63	787.227	484.042	502.271	protein_coding	ENSG00000011201	ensembl_havana	12	1	0.00341555	0.0815731	0.63029	-0.665912	-1.58657	388.413	616.244	-2.16102	-1.16482	0.00341478	0.0815548
ANP32A	ANP32A	1643.23	1657.21	1524.99	1758.87	2148.1	1872.8	15	68778535	68820898	-	10605.2	2148.1	1756.66	1767.53	protein_coding	ENSG00000140350	ensembl_havana	15	1	0.0707441	0.412913	1.19761	0.260152	1.19761	1926.88	1608.94	-1.01537	1.4563	0.0707411	0.412896
ANP32E	ANP32E	1665.21	1518.61	1382.39	1291.21	1237.07	1345.07	1	150218417	150236157	-	8439.55	1665.21	1399.41	1406.59	protein_coding	ENSG00000143401	ensembl_havana	15	1	0.093369	0.467145	0.847879	-0.238069	-1.17941	1291.17	1522.83	-1.43015	1.02813	0.0933659	0.467129
ANXA1	ANXA1	8952.71	9499.16	9168.62	10778.2	10979.3	15145.9	9	73151865	73170394	+	64523.9	15145.9	10573.7	10754	protein_coding	ENSG00000135046	ensembl_havana	14	1	0.017357	0.212102	1.33614	0.418068	1.33614	12301.7	9206.88	1.05237	1.69641	0.0173551	0.212079
ANXA11	ANXA11	2059.79	2383.21	2156.12	3339.8	2813.06	2422.82	10	80150889	80205573	-	15174.8	3339.8	2494.48	2529.13	protein_coding	ENSG00000122359	ensembl_havana	18	1	0.0272521	0.26531	1.29913	0.377546	1.29913	2857.96	2199.91	1.02982	1.63886	0.0272498	0.265288
ANXA2	ANXA2	14855.5	16345.4	14579.3	20635.9	20851.6	25349.2	15	60347134	60402884	-	112617	25349.2	18384.7	18769.5	protein_coding	ENSG00000182718	ensembl_havana	17	1	0.000155107	0.011666	1.45993	0.545902	1.45993	22279.4	15260.5	1.20002	1.77614	0.000155017	0.0116592
ANXA2P2	ANXA2P2	9754.04	9951.52	9888.91	12405.6	12595.3	18109.2	9	33624274	33625294	+	72704.6	18109.2	11812	12117.4	processed_pseudogene	ENSG00000231991	havana	4	1	0.00349525	0.082517	1.45675	0.542751	1.45675	14370.6	9864.82	1.13171	1.87514	0.00349447	0.0824986
ANXA3	ANXA3	1493.25	1472.38	1567.24	1228.27	1276.57	974.957	4	78551747	78610452	+	8012.68	1567.24	1319.07	1335.45	protein_coding	ENSG00000138772	ensembl_havana	13	1	0.018567	0.218538	0.767588	-0.381597	-1.30278	1159.59	1510.69	-1.62372	-1.04528	0.0185651	0.218516
ANXA5	ANXA5	8602.1	9358.41	9280.36	8210.64	12402.7	16614.7	4	121667946	121696996	-	64468.9	16614.7	10398.2	10744.8	protein_coding	ENSG00000164111	ensembl_havana	15	1	0.0694068	0.409729	1.3667	0.450691	1.3667	12409.9	9080.24	-1.02512	1.91478	0.0694038	0.409712
ANXA8	ANXA8	163.663	210.446	273.954	196.551	126.482	101.868	10	47460162	47484159	-	1072.96	273.954	169.714	178.827	protein_coding	ENSG00000265190	ensembl_havana	6	1	0.0713313	0.414848	0.655361	-0.609638	-1.52588	141.306	215.616	-2.41532	1.03738	0.0713283	0.414831
AOPEP	AOPEP	270.371	366.097	390.819	580.502	422.458	1182.28	9	94726701	95087219	+	3212.53	1182.28	473.122	535.421	protein_coding	ENSG00000148120	ensembl_havana	16	1	0.00312388	0.0780733	2.1289	1.09011	2.1289	728.662	342.272	1.2898	3.51389	0.00312315	0.0780551
AOX1	AOX1	1497.08	1340.87	1643.82	614.139	1462.07	748.782	2	200586014	200677065	+	7306.76	1643.82	1142.03	1217.79	protein_coding	ENSG00000138356	ensembl_havana	14	1	0.0336167	0.294313	0.630558	-0.665299	-1.5859	941.876	1493.72	-2.42676	-1.03639	0.0336143	0.294292
AP000311.1	AP000311.1	2.898	8.67335e-14	23.8077	5.9711e-09	2.35913e-16	4.52793e-19	21	33584687	33931608	-	26.7057	23.8077	1.25012e-09	4.45095	protein_coding	ENSG00000249209	havana	2	1	0.0210502	0.23295	0.0197505	-5.66197	-50.6317	0.174497	8.83508	-1420.35	-1.80488	0.0210482	0.232928
AP000593.4	AP000593.4	1.8999	0.000380217	0.000634739	0.151702	26.6302	21.9014	11	72261731	72290689	+	50.5842	26.6302	0.185367	8.43071	lncRNA	ENSG00000285864	havana	1	1	0.0115157	0.168455	24.6479	4.62339	24.6479	16.2651	0.659899	2.05191	296.074	0.0115142	0.168432
AP000812.5	AP000812.5	2.27162	2.1248	3.78331e-18	7.21678	12.0012	8.89356	11	72080777	72110783	+	32.5079	12.0012	0.00491317	5.41799	protein_coding	ENSG00000284922	havana	1	1	0.0336799	0.294407	6.05171	2.59734	6.05171	9.38501	1.5508	1.14907	31.8721	0.0336775	0.294386
AP000866.1	AP000866.1	76.4299	85.3042	92.4235	32.9806	63.5112	18.848	11	124800424	124834488	+	369.497	92.4235	53.6288	61.5829	lncRNA	ENSG00000245498	havana	7	1	0.019403	0.223906	0.45397	-1.13933	-2.20279	38.4303	84.6538	-4.27096	-1.13611	0.0194011	0.223883
AP001020.2	AP001020.2	0.955373	10.663	2.64067	0	0	0	18	738058	739663	-	14.2591	10.663	0	2.37651	lncRNA	ENSG00000264635	havana	1	1	0.0395422	0.317946	0.0365045	-4.77578	-27.3939	0.174496	4.78013	-640.454	-1.17171	0.0395396	0.317925
AP001062.1	AP001062.1	88.4421	64.3523	103.298	50.2187	47.8361	41.83	21	44331234	44335852	+	395.977	103.298	62.4075	65.9961	lncRNA	ENSG00000184441	havana	4	1	0.0136978	0.186567	0.547743	-0.868428	-1.82567	46.5602	85.0036	-2.94629	-1.13128	0.0136962	0.186545
AP001324.1	AP001324.1	734.682	909.023	716.942	1744.76	1610.45	1291.71	11	74745716	74746115	-	7007.57	1744.76	1096.48	1167.93	processed_pseudogene	ENSG00000227615	havana	1	1	2.6746e-07	0.000110885	1.96663	0.975722	1.96663	1548.57	787.423	1.51998	2.54452	2.66957e-07	0.000110676
AP001528.1	AP001528.1	15.286	10.663	11.883	5.42525	1.83677	4.28364	11	86892214	86925038	-	49.3777	15.286	6.60032	8.22961	lncRNA	ENSG00000255471	havana	1	1	0.0546995	0.368973	0.302684	-1.72411	-3.30377	3.81902	12.6172	-11.1809	1.02437	0.0546966	0.368954
AP001931.2	AP001931.2	311.224	210.175	195.003	368.885	445.835	626.465	11	57712582	57818432	+	2157.59	626.465	330.961	359.598	protein_coding	ENSG00000288534	havana	1	1	0.00050177	0.0263243	2.01041	1.00749	2.01041	480.718	239.114	1.35665	2.97923	0.000501556	0.0263131
AP002990.1	AP002990.1	156.217	83.7666	275.432	94.0899	98.6407	55.4876	11	62559603	62591532	-	763.634	275.432	110.858	127.272	protein_coding	ENSG00000255508	havana	7	1	0.0232906	0.24601	0.482621	-1.05104	-2.07202	82.6478	171.248	-3.88811	-1.1042	0.0232885	0.245987
AP003419.1	AP003419.1	0.820373	0.490593	1.80038	38.1036	1.15337	49.8105	11	67351572	67373585	-	92.1788	49.8105	3.41501	15.3631	protein_coding	ENSG00000256514	havana	1	1	0.000484706	0.025747	30.1181	4.91256	30.1181	29.6873	0.985694	4.44757	203.955	0.000484497	0.0257359
AP005262.1	AP005262.1	4.77687	2.66576	2.64067	1.08505	5.51032	38.5528	18	1509022	2049511	+	55.2314	38.5528	4.44863	9.20524	lncRNA	ENSG00000266602	havana_tagene	2	1	0.0935661	0.467776	4.48024	2.16358	4.48024	15.1266	3.3763	-1.28811	25.8556	0.093563	0.46776
AP006621.3	AP006621.3	31.5273	23.1032	31.6881	20.616	5.51032	6.85382	11	777578	784298	+	119.299	31.6881	16.1843	19.8831	lncRNA	ENSG00000255284	havana	2	1	0.0440322	0.332832	0.377557	-1.40523	-2.64861	10.8441	28.7217	-6.83486	-1.02637	0.0440295	0.332811
AP006621.5	AP006621.5	49.6794	47.9836	22.4457	24.9562	22.0413	21.4182	11	779617	780756	+	188.524	49.6794	29.2819	31.4207	TEC	ENSG00000279672	ensembl_havana	1	1	0.106143	0.494173	0.564385	-0.825248	-1.77184	22.7724	40.3491	-3.54624	1.12959	0.106139	0.494159
AP1S3	AP1S3	509.617	441.032	374.975	785.577	528.073	1089.82	2	223751686	223838028	-	3729.09	1089.82	580.086	621.515	protein_coding	ENSG00000152056	ensembl_havana	17	1	0.00265413	0.0729809	1.81215	0.857706	1.81215	801.303	442.182	1.22971	2.67046	0.00265348	0.0729629
AP2S1	AP2S1	1657.57	1902.46	1708.51	2384.94	2257.4	1877.1	19	46838136	46850847	-	11788	2384.94	1946.84	1964.66	protein_coding	ENSG00000042753	ensembl_havana	12	1	0.0509424	0.358788	1.23696	0.3068	1.23696	2172.68	1756.47	-1.00087	1.53141	0.0509396	0.358769
AP5B1	AP5B1	549.34	462.064	657.527	312.494	368.273	344.405	11	65773898	65780977	-	2694.1	657.527	433.268	449.017	protein_coding	ENSG00000254470	ensembl_havana	3	1	0.000593701	0.0290828	0.615523	-0.700114	-1.62463	341.884	555.436	-2.14302	-1.23164	0.000593461	0.029071
APBB2	APBB2	3001.78	2696.84	2719.85	1740.4	2538.96	2334.93	4	40810027	41216715	-	15032.8	3001.78	2470.17	2505.46	protein_coding	ENSG00000163697	ensembl_havana	17	1	0.0575538	0.376324	0.785844	-0.347686	-1.27252	2205.29	2806.28	-1.63186	1.00776	0.0575509	0.376305
APEX2	APEX2	652.519	724.197	712.981	500.208	596.032	414.656	X	55000363	55009058	+	3600.59	724.197	588.762	600.099	protein_coding	ENSG00000169188	ensembl_havana	5	1	0.0156119	0.20028	0.722923	-0.468085	-1.38327	503.511	696.493	-1.79941	-1.06337	0.0156102	0.200258
API5P1	API5P1	71.9538	74.8733	62.1559	85.0051	85.0138	186.341	X	116106921	116108431	-	565.343	186.341	87.5691	94.2238	processed_pseudogene	ENSG00000234558	havana	1	1	0.0589682	0.379244	1.70571	0.770371	1.70571	119.022	69.7788	-1.02043	2.96889	0.0589653	0.379225
APIP	APIP	369.721	303.007	339.326	439.389	407.763	553.445	11	34853094	34916380	-	2412.65	553.445	394.499	402.108	protein_coding	ENSG00000149089	ensembl_havana	13	1	0.0221949	0.238175	1.38502	0.469906	1.38502	467.103	337.254	1.04768	1.83098	0.0221928	0.238152
APLN	APLN	92.6712	107.519	113.549	72.6984	70.7157	22.2749	X	129645259	129654957	-	479.428	113.549	71.1342	79.9046	protein_coding	ENSG00000171388	ensembl_havana	12	1	0.0490742	0.351079	0.526668	-0.925034	-1.89873	55.0459	104.517	-3.59581	-1.0026	0.0490714	0.351059
APLP1	APLP1	62.0992	45.3178	68.6575	98.7395	123.064	56.544	19	35867899	35879793	+	454.422	123.064	71.4236	75.737	protein_coding	ENSG00000105290	ensembl_havana	13	1	0.10334	0.488137	1.58471	0.664217	1.58471	92.6818	58.4851	-1.0981	2.75766	0.103337	0.488122
APOA1	APOA1	13.3752	12.4402	17.1644	41.2319	39.4906	47.12	11	116835751	116837951	-	170.822	47.12	24.5536	28.4704	protein_coding	ENSG00000118137	ensembl_havana	9	1	0.00104024	0.0413131	3.00454	1.58714	3.00454	42.642	14.1926	1.55681	5.79855	0.00103988	0.041299
APOL1	APOL1	466.222	491.386	573.027	370.001	449.091	330.697	22	36253071	36267531	+	2680.42	573.027	439.568	446.737	protein_coding	ENSG00000100342	ensembl_havana	21	1	0.0406625	0.320748	0.75192	-0.411348	-1.32993	383.231	509.669	-1.74741	-1.01219	0.0406599	0.320727
APOL2	APOL2	281.835	354.546	419.866	186.629	262.658	316.132	22	36226209	36239955	-	1821.67	419.866	294.331	303.611	protein_coding	ENSG00000128335	ensembl_havana	14	1	0.0923626	0.464079	0.726577	-0.460812	-1.37632	255.502	351.652	-1.99645	1.05396	0.0923595	0.464063
APOL6	APOL6	504.437	642.447	553.221	402.554	448.172	448.069	22	35648446	35668405	+	2998.9	642.447	493.771	499.817	protein_coding	ENSG00000221963	ensembl_havana	6	1	0.0282039	0.269634	0.763951	-0.388448	-1.30898	433.133	566.964	-1.66485	-1.02919	0.0282016	0.269612
APOLD1	APOLD1	57.8139	49.7623	45.924	64.0197	66.1434	101.095	12	12725917	12829976	+	384.759	101.095	61.9561	64.1264	protein_coding	ENSG00000178878	ensembl_havana	12	1	0.105632	0.49295	1.50657	0.591265	1.50657	77.2572	51.2803	-1.09043	2.47501	0.105629	0.492935
ARAF	ARAF	1455.04	1460.83	1610.8	1123.02	1226.97	950.106	X	47561100	47571921	+	7826.77	1610.8	1284.06	1304.46	protein_coding	ENSG00000078061	ensembl_havana	13	1	0.00431807	0.0950758	0.729126	-0.455759	-1.3715	1099.82	1508.4	-1.70379	-1.10402	0.00431718	0.0950562
ARAP1	ARAP1	2008.79	1733.15	2209	1627.01	1779.48	1215.69	11	72685069	72793600	-	10573.1	2209	1732.79	1762.19	protein_coding	ENSG00000186635	ensembl_havana	14	1	0.0658723	0.399058	0.776811	-0.364365	-1.28732	1540.46	1983.06	-1.68487	1.01671	0.0658693	0.39904
ARAP3	ARAP3	1356.63	1354.2	1175.1	958.098	1046.05	946.681	5	141653401	141682231	-	6836.76	1356.63	1126.93	1139.46	protein_coding	ENSG00000120318	ensembl_havana	16	1	0.00551194	0.110096	0.758909	-0.398	-1.31768	983.653	1296.14	-1.60109	-1.08444	0.00551092	0.110076
ARC	ARC	9.55373	7.10868	6.60168	22.7861	26.6332	11.9942	8	142611049	142614480	-	84.6775	26.6332	12.179	14.1129	protein_coding	ENSG00000198576	ensembl_havana	4	1	0.0508518	0.358788	2.62143	1.39035	2.62143	20.4248	7.79147	-1.00358	6.89648	0.050849	0.358769
ARF4	ARF4	4883.76	4950.12	4590.87	5682.11	6613.39	6652.53	3	57571363	57598221	-	33372.8	6652.53	5502.13	5562.13	protein_coding	ENSG00000168374	ensembl_havana	11	1	0.00253469	0.0713322	1.31355	0.393476	1.31355	6316.56	4808.75	1.10041	1.56798	0.00253405	0.0713142
ARF5	ARF5	1251.55	1378.2	1494.62	2183.12	1979.12	1364.75	7	127588386	127591701	+	9651.36	2183.12	1573.92	1608.56	protein_coding	ENSG00000004059	ensembl_havana	11	1	0.0463512	0.341388	1.34005	0.422283	1.34005	1841.85	1374.47	1.00474	1.78724	0.0463484	0.341368
ARF6	ARF6	6847.16	7926.18	6811.61	8131.37	7979.85	8979.37	14	49893082	49897055	+	46675.5	8979.37	7742.33	7779.26	protein_coding	ENSG00000165527	ensembl_havana	7	1	0.105442	0.492662	1.16234	0.217026	1.16234	8363.76	7195.66	-1.03219	1.39451	0.105439	0.492648
ARFGAP1	ARFGAP1	1716.81	1977.09	2281.56	1653.62	1705.45	1292.8	20	63272785	63289791	+	10627.3	2281.56	1745.01	1771.22	protein_coding	ENSG00000101199	ensembl_havana	13	1	0.0531379	0.363232	0.778632	-0.360986	-1.2843	1550.34	1991.11	-1.65503	1.00339	0.053135	0.363213
ARG2	ARG2	147.742	144.077	166.662	98.2268	133.089	94.0717	14	67619920	67651709	+	783.869	166.662	127.829	130.645	protein_coding	ENSG00000081181	ensembl_havana	8	1	0.0659357	0.399058	0.711116	-0.491843	-1.40624	108.508	152.588	-2.02241	1.02271	0.0659327	0.39904
ARGLU1	ARGLU1	1482.74	1543.48	1515.75	1069.86	855.02	1073.48	13	106541673	106568138	-	7540.33	1543.48	1226.63	1256.72	protein_coding	ENSG00000134884	ensembl_havana	15	1	0.000110268	0.00901125	0.660048	-0.599358	-1.51504	999.318	1514.01	-1.87014	-1.22737	0.000110199	0.00900556
ARHGAP1	ARHGAP1	2065.52	1754.07	1807.54	2179.87	2034.23	2725.25	11	46677080	46700620	-	12566.5	2725.25	2072.05	2094.41	protein_coding	ENSG00000175220	ensembl_havana	12	1	0.0792493	0.432727	1.23328	0.302498	1.23328	2313.44	1875.85	-1.02478	1.55867	0.0792462	0.43271
ARHGAP11A	ARHGAP11A	1427.35	1284.17	1247.63	1004.63	946.469	839.483	15	32615144	32639942	+	6749.73	1427.35	1105.5	1124.96	protein_coding	ENSG00000198826	ensembl_havana	11	1	0.000785504	0.0340612	0.70435	-0.505636	-1.41975	929.802	1320.09	-1.74203	-1.15709	0.000785211	0.0340485
ARHGAP11B	ARHGAP11B	105.44	71.7999	115.153	57.4868	46.3067	67.1973	15	30624494	30685607	+	463.384	115.153	73.366	77.2306	protein_coding	ENSG00000284906 | ENSG00000285077	ensembl_havana | havana	1 | 2	1	0.0287788	0.271768	0.587111	-0.768295	-1.70326	57.0328	97.1415	-2.74534	-1.05673	0.0287765	0.271746
ARHGAP23	ARHGAP23	3241.93	2702	3593.85	2802.36	2625.61	1756.96	17	38419280	38512386	+	16722.7	3593.85	2722.24	2787.12	protein_coding	ENSG00000275832	ensembl_havana	5	1	0.0641778	0.394537	0.753308	-0.408688	-1.32748	2394.55	3178.71	-1.79185	1.01683	0.0641748	0.394519
ARHGAP28	ARHGAP28	83.1174	26.6576	52.8134	78.1236	118.472	164.492	18	6729718	6915717	+	523.675	164.492	75.0124	87.2792	protein_coding	ENSG00000088756	ensembl_havana	12	1	0.0176916	0.21343	2.22588	1.15438	2.22588	120.526	54.1475	1.14912	4.31158	0.0176898	0.213407
ARHGAP42	ARHGAP42	858.875	724.068	846.333	524.077	525.318	480.626	11	100687288	100993942	+	3959.3	858.875	641.425	659.883	protein_coding	ENSG00000165895	ensembl_havana	19	1	2.49269e-05	0.00297149	0.629986	-0.666608	-1.58734	509.858	809.317	-1.96773	-1.28048	2.49051e-05	0.00296888
ARHGEF11	ARHGEF11	737.549	630.895	747.31	438.361	475.724	527.744	1	156934840	157045371	-	3557.58	747.31	580.51	592.931	protein_coding	ENSG00000132694	ensembl_havana	18	1	0.00117533	0.045405	0.682386	-0.551339	-1.46545	480.936	704.786	-1.84595	-1.16338	0.00117494	0.0453901
ARHGEF28	ARHGEF28	2006.28	2116.62	2099.33	1170.77	1620.02	735.072	5	73626158	73941994	+	9748.1	2116.62	1521.97	1624.68	protein_coding	ENSG00000214944	ensembl_havana	9	1	0.0026171	0.0727667	0.566593	-0.819614	-1.76493	1175.15	2074.06	-2.55513	-1.21911	0.00261645	0.0727486
ARHGEF35	ARHGEF35	20.9625	16.9088	26.5635	16.6985	56.5955	56.5924	7	144186083	144195834	-	194.321	56.5955	28.2061	32.3869	protein_coding	ENSG00000213214	ensembl_havana	5	1	0.0904628	0.459586	2.03453	1.0247	2.03453	43.4555	21.359	-1.11854	4.62997	0.0904597	0.45957
ARHGEF7	ARHGEF7	727.039	749.966	600.753	511.059	540.01	634.832	13	111114559	111305738	+	3763.66	749.966	621.066	627.276	protein_coding	ENSG00000102606	ensembl_havana	18	1	0.0959599	0.472516	0.810987	-0.302249	-1.23306	562.289	693.339	-1.578	1.03785	0.0959567	0.472501
ARID4A	ARID4A	523.545	560.696	463.438	427.51	461.028	358.112	14	58298504	58373888	+	2794.33	560.696	461.028	465.722	protein_coding	ENSG00000032219	ensembl_havana	19	1	0.0940458	0.46852	0.804283	-0.314225	-1.24334	415.375	516.454	-1.6044	1.03784	0.0940426	0.468504
ARID5A	ARID5A	149.038	163.5	240.301	107.42	158.881	49.6902	2	96536743	96552635	+	868.83	240.301	130.617	144.805	protein_coding	ENSG00000196843	ensembl_havana	17	1	0.06316	0.392395	0.572014	-0.805879	-1.74821	105.242	183.986	-3.15132	1.03111	0.063157	0.392377
ARL13B	ARL13B	404.122	369.652	371.014	409.064	460.111	578.291	3	93980139	94055679	+	2592.25	578.291	426.661	432.042	protein_coding	ENSG00000169379	ensembl_havana	16	1	0.0912152	0.460765	1.26524	0.339415	1.26524	482.924	381.685	-1.03846	1.66241	0.091212	0.46075
ARL14EP	ARL14EP	482.464	510.048	450.235	503.463	544.603	882.431	11	30323104	30338224	+	3373.24	882.431	547.067	562.207	protein_coding	ENSG00000152219	ensembl_havana	5	1	0.0977259	0.477753	1.33842	0.420533	1.33842	643.926	481.109	-1.05497	1.88984	0.0977228	0.477737
ARL16	ARL16	386.926	427.682	443.633	558.8	442.662	596.283	17	81681174	81683925	-	2855.99	596.283	470.355	475.998	protein_coding	ENSG00000214087	ensembl_havana	8	1	0.0716035	0.415256	1.27053	0.345434	1.27053	532.573	419.173	-1.02127	1.64858	0.0716005	0.415239
ARL2	ARL2	1672.83	2040.81	1862.93	3505.51	2800.02	1583.67	11	65014160	65022185	+	13465.8	3505.51	2150.33	2244.3	protein_coding	ENSG00000213465	ensembl_havana	8	1	0.0726225	0.417772	1.41442	0.500215	1.41442	2629.26	1858.89	-1.03234	2.06529	0.0726195	0.417755
ARL2-SNX15	ARL2-SNX15	0.521211	15.1588	14.9039	45.311	105.745	3.82766	11	65014182	65040571	+	185.467	105.745	11.3692	30.9112	protein_coding	ENSG00000273003	havana	1	1	0.0372751	0.310147	5.0859	2.3465	5.0859	51.6136	10.1484	1.10063	23.5015	0.0372725	0.310126
ARL4C	ARL4C	3047.62	2998.09	3287.66	3395.17	3565.95	7510.44	2	234493041	234497082	-	23804.9	7510.44	3738.8	3967.49	protein_coding	ENSG00000188042	ensembl_havana	8	1	0.0347519	0.29849	1.55072	0.632936	1.55072	4824.28	3111	1.03193	2.33031	0.0347494	0.298469
ARL4D	ARL4D	110.823	178.606	192.769	157.332	225.923	341.834	17	43398993	43401138	+	1207.29	341.834	189.537	201.215	protein_coding	ENSG00000175906	ensembl_havana	5	1	0.0999895	0.481207	1.50772	0.592373	1.50772	241.999	160.506	-1.08182	2.45923	0.0999864	0.481191
ARL6IP1	ARL6IP1	4256.12	4089.99	3587.89	5095.87	4348.01	5166.05	16	18791669	18801573	-	26543.9	5166.05	4389.08	4423.99	protein_coding	ENSG00000170540	ensembl_havana	15	1	0.0457543	0.339525	1.22396	0.291551	1.22396	4869.89	3978.81	1.00382	1.49237	0.0457516	0.339505
ARL6IP4	ARL6IP4	1677.05	1927.2	1931.63	2424.28	2208.3	2059.55	12	122980060	122982914	+	12228	2424.28	2024.43	2038	protein_coding	ENSG00000182196	ensembl_havana	13	1	0.0566585	0.374068	1.20884	0.273618	1.20884	2230.28	1844.98	-1.00539	1.46916	0.0566556	0.374049
ARL6IP5	ARL6IP5	3312.28	3968.43	3246.71	4122.11	5091.53	5877.16	3	69084937	69106093	+	25618.2	5877.16	4170.81	4269.7	protein_coding	ENSG00000144746	ensembl_havana	7	1	0.00469874	0.0996065	1.43343	0.519475	1.43343	5030.82	3509.63	1.11676	1.8399	0.00469781	0.0995867
ARL8B	ARL8B	1930.83	1925.57	1844.5	2114.76	2236.27	2401.42	3	5122245	5180913	+	12453.3	2401.42	2066.52	2075.56	protein_coding	ENSG00000134108	ensembl_havana	13	1	0.0503629	0.356761	1.18446	0.244234	1.18446	2251.24	1900.64	-1.00027	1.40333	0.0503601	0.356741
ARMC10	ARMC10	732.844	858.001	762.509	994.086	955.094	962.151	7	103074881	103099760	+	5264.68	994.086	871.451	877.447	protein_coding	ENSG00000170632	ensembl_havana	14	1	0.0326635	0.289023	1.23639	0.306132	1.23639	970.339	784.817	1.01766	1.50213	0.0326611	0.289002
ARMC10P1	ARMC10P1	17.1238	18.1442	13.8485	21.5232	32.1719	35.9391	3	94506766	94507621	-	138.751	35.9391	21.7912	23.1251	processed_pseudogene	ENSG00000178660	havana	6	1	0.106163	0.494173	1.82099	0.864722	1.82099	29.9802	16.4637	-1.13624	3.76776	0.10616	0.494159
ARMC7	ARMC7	249.352	216.815	235.02	315.749	315.925	418.94	17	75109952	75130273	+	1751.8	418.94	284.565	291.967	protein_coding	ENSG00000125449	ensembl_havana	7	1	0.00627684	0.11884	1.50004	0.585001	1.50004	350.5	233.66	1.12153	2.0063	0.00627574	0.118819
ARMCX4	ARMCX4	111.779	110.185	149.198	90.0592	103.778	54.8306	X	101418287	101533460	+	619.829	149.198	99.0033	103.305	protein_coding	ENSG00000196440	ensembl_havana	11	1	0.0958761	0.472241	0.67062	-0.576432	-1.49116	82.7543	123.4	-2.38652	1.07329	0.095873	0.472225
ARPC1B	ARPC1B	1613.33	1903.74	1857.96	3206.8	2386.54	1658.43	7	99374249	99394817	+	12626.8	3206.8	2041.66	2104.47	protein_coding	ENSG00000130429	ensembl_havana	15	1	0.0809144	0.436343	1.3489	0.431786	1.3489	2416.7	1791.61	-1.03748	1.88773	0.0809113	0.436327
ARPC2	ARPC2	4071.79	4274.06	3931.97	4783.86	4574.51	4954.49	2	218217141	218254357	+	26590.7	4954.49	4416.31	4431.78	protein_coding	ENSG00000163466	ensembl_havana	16	1	0.0551103	0.369847	1.1656	0.221067	1.1656	4771.02	4093.2	-1.00336	1.36317	0.0551075	0.369828
ARPC3	ARPC3	4033.39	4384.4	4016.08	5213.2	5013.74	5012.71	12	110434823	110450423	-	27673.5	5213.2	4586.21	4612.25	protein_coding	ENSG00000111229	ensembl_havana	16	1	0.0100061	0.153961	1.22545	0.293315	1.22545	5079.7	4145.16	1.0498	1.4305	0.0100047	0.153939
ARPC4	ARPC4	2108.9	2523.35	2365.69	3415.75	3295.85	2564.63	3	9792495	9807727	+	16274.2	3415.75	2671.44	2712.36	protein_coding	ENSG00000241553	ensembl_havana	12	1	0.017554	0.212372	1.32537	0.406399	1.32537	3091.63	2332.65	1.05045	1.67225	0.0175521	0.212349
ARSG	ARSG	33.9545	36.7652	42.8961	66.5642	76.1796	76.6401	17	68259182	68422732	+	333	76.6401	52.4462	55.4999	protein_coding	ENSG00000141337	ensembl_havana	12	1	0.00565997	0.112131	1.94174	0.957349	1.94174	73.2028	37.6996	1.21352	3.10695	0.00565893	0.11211
AS3MT	AS3MT	17.7547	29.5304	30.1966	2.33352	11.7779	16.952	10	102869470	102901900	+	108.545	30.1966	13.9521	18.0908	protein_coding	ENSG00000214435	ensembl_havana	8	1	0.0915739	0.461825	0.406281	-1.29945	-2.46135	10.4759	25.7849	-7.00812	1.15679	0.0915708	0.461809
ASAH1	ASAH1	906.649	985.839	1054.9	1100.01	1201.55	1187.43	8	18055992	18084999	-	6436.37	1201.55	1067.5	1072.73	protein_coding	ENSG00000104763	ensembl_havana	19	1	0.082369	0.439595	1.18474	0.244566	1.18474	1163.24	981.853	-1.02199	1.43446	0.0823659	0.439578
ASAP3	ASAP3	356.355	319.891	297.076	460.062	354.497	407.803	1	23428563	23484569	-	2195.68	460.062	362.053	365.947	protein_coding	ENSG00000088280	ensembl_havana	19	1	0.0946486	0.469459	1.25371	0.326201	1.25371	407.191	324.789	-1.03981	1.63436	0.0946455	0.469444
ASB1	ASB1	1518.09	1515.04	1532.91	1180.54	1300.44	985.237	2	238426742	238452251	+	8032.25	1532.91	1321.78	1338.71	protein_coding	ENSG00000065802	ensembl_havana	12	1	0.0122328	0.174148	0.759002	-0.397825	-1.31752	1155.17	1521.96	-1.63472	-1.06187	0.0122312	0.174125
ASB13	ASB13	382.149	348.326	378.935	577.245	529.912	348.689	10	5638867	5666596	-	2565.26	577.245	418.598	427.543	protein_coding	ENSG00000196372	ensembl_havana	13	1	0.0999585	0.481193	1.31154	0.391267	1.31154	484.877	369.699	-1.05329	1.81181	0.0999553	0.481178
ASB9	ASB9	157.636	207.929	174.284	104.165	129.492	55.6873	X	15235288	15270468	-	829.194	207.929	127.475	138.199	protein_coding	ENSG00000102048	ensembl_havana	16	1	0.0116981	0.169952	0.534953	-0.902516	-1.86932	96.308	180.031	-3.04015	-1.14941	0.0116965	0.169929
ASNS	ASNS	277.507	292.488	217.486	130.395	151.216	223.224	7	97851677	97872543	-	1292.32	292.488	206.571	215.386	protein_coding	ENSG00000070669	ensembl_havana	17	1	0.0239378	0.24841	0.641324	-0.640874	-1.55927	168.604	262.899	-2.29282	-1.06041	0.0239357	0.248387
ASPM	ASPM	1635.61	1260.01	1408.8	1057.93	1035.02	1377.62	1	197084127	197146695	-	7774.98	1635.61	1279.1	1295.83	protein_coding	ENSG00000066279	ensembl_havana	18	1	0.103473	0.488428	0.806524	-0.310211	-1.23989	1157.19	1434.78	-1.60617	1.04478	0.10347	0.488413
ASPN	ASPN	21.0182	30.2119	34.3287	3.25515	2.75516	18.848	9	92456205	92482507	-	110.417	34.3287	12.428	18.4029	protein_coding	ENSG00000106819	ensembl_havana	13	1	0.0380912	0.312175	0.294753	-1.76242	-3.39267	8.39208	28.4715	-10.7632	-1.0694	0.0380886	0.312154
ASS1	ASS1	46.8133	32.8777	44.8914	16.2758	27.5516	22.2749	9	130444961	130501275	+	190.685	46.8133	29.7274	31.7808	protein_coding	ENSG00000130707	ensembl_havana	18	1	0.0560539	0.371754	0.533825	-0.905562	-1.87327	22.118	41.433	-3.56651	1.01634	0.0560511	0.371735
ASXL1	ASXL1	3668.67	3655.64	4001.92	2979.54	2983.84	2720.08	20	32358330	32439320	+	20009.7	4001.92	3302.74	3334.95	protein_coding	ENSG00000171456	ensembl_havana	20	1	0.00179973	0.0581265	0.766748	-0.383175	-1.30421	2894.22	3774.67	-1.5409	-1.10388	0.00179921	0.05811
ATAT1	ATAT1	438.516	334.997	447.594	256.072	257.148	345.261	6	30626842	30646824	+	2079.59	447.594	338.143	346.598	protein_coding	ENSG00000137343	ensembl_havana	18	1	0.0274273	0.265949	0.704422	-0.505488	-1.4196	286.424	406.608	-1.93821	-1.03976	0.027425	0.265927
ATG13	ATG13	1368.26	1298.23	1289.97	1728.49	1538.29	2860.43	11	46617527	46674819	+	10083.7	2860.43	1610.17	1680.61	protein_coding	ENSG00000175224	ensembl_havana	16	1	0.0113043	0.166297	1.54889	0.631233	1.54889	2042.78	1318.87	1.10407	2.17291	0.0113028	0.166275
ATG16L2	ATG16L2	507.356	444.706	509.744	310.444	368.899	225.499	11	72814406	72843675	+	2366.65	509.744	379.137	394.441	protein_coding	ENSG00000168010	ensembl_havana	11	1	0.00308044	0.0774787	0.618883	-0.692262	-1.61581	301.442	487.075	-2.22022	-1.17595	0.00307972	0.0774606
ATG9B	ATG9B	6.68761	14.2174	1.71941	0	0	7.49457e-40	7	151012209	151024500	-	22.6244	14.2174	0	3.77073	protein_coding	ENSG00000181652	ensembl_havana	19	1	0.00624582	0.118622	0.0229613	-5.44465	-43.5515	0.174496	7.59958	-651.204	-2.91266	0.00624472	0.118601
ATIC	ATIC	1216.19	1204.04	1070.79	1488.68	1516.25	1259.39	2	215311956	215349774	+	7755.34	1516.25	1282.86	1292.56	protein_coding	ENSG00000138363	ensembl_havana	15	1	0.0585714	0.378207	1.2206	0.287595	1.2206	1421.14	1164.29	-1.00725	1.50068	0.0585685	0.378188
ATOX1	ATOX1	416.542	629.119	538.697	933.145	910.119	616.845	5	151742316	151772533	-	4044.47	933.145	647.878	674.078	protein_coding	ENSG00000177556	ensembl_havana	12	1	0.00961294	0.151128	1.55206	0.634181	1.55206	819.738	528.162	1.11278	2.16474	0.00961155	0.151106
ATP11A	ATP11A	462.4	391.866	190.128	489.357	515.215	569.725	13	112690329	112887169	+	2618.69	569.725	412.807	436.449	protein_coding	ENSG00000068650	ensembl_havana	18	1	0.0635313	0.393287	1.5042	0.588998	1.5042	524.842	348.917	-1.02326	2.31526	0.0635283	0.393269
ATP11C	ATP11C	1156.95	932.123	959.886	762.792	783.385	624.555	X	139726346	139945277	-	5219.69	1156.95	853.415	869.949	protein_coding	ENSG00000101974	ensembl_havana	14	1	0.0059423	0.115042	0.711561	-0.490941	-1.40536	723.325	1016.53	-1.79094	-1.10279	0.00594123	0.115022
ATP1A1	ATP1A1	20296.6	19871.4	17698	27283.9	26124	38034.5	1	116372668	116410262	+	149308	38034.5	24050.1	24884.7	protein_coding	ENSG00000163399	ensembl_havana	16	1	0.000405835	0.0231489	1.58023	0.660136	1.58023	30481.2	19289.1	1.22626	2.03638	0.000405651	0.0231385
ATP1A1-AS1	ATP1A1-AS1	156.721	147.556	125.473	193.222	182.02	261.418	1	116390575	116418636	-	1066.41	261.418	172.858	177.735	lncRNA	ENSG00000203865	havana	10	1	0.0278242	0.268191	1.47969	0.565299	1.47969	212.431	143.564	1.04364	2.09794	0.0278219	0.268169
ATP2A3	ATP2A3	35.3488	50.6494	62.0558	14.1056	14.6942	25.7018	17	3923870	3964465	-	202.556	62.0558	28.976	33.7593	protein_coding	ENSG00000074370	ensembl_havana	18	1	0.00501897	0.103786	0.371532	-1.42844	-2.69156	18.2701	49.1752	-5.37496	-1.34782	0.005018	0.103766
ATP2B1	ATP2B1	3726	3668.07	3700.92	2907.97	2815.77	3218.72	12	89588049	89709301	-	20037.4	3726	3317.49	3339.57	protein_coding	ENSG00000070961	ensembl_havana	15	1	0.0105204	0.159666	0.806072	-0.31102	-1.24058	2981.1	3698.31	-1.46338	-1.05171	0.0105189	0.159644
ATP2B1-AS1	ATP2B1-AS1	38.2149	39.0977	46.2118	32.5515	20.2045	10.2807	12	89708959	89712591	+	186.561	46.2118	27.8524	31.0935	lncRNA	ENSG00000271614	havana	1	1	0.0760333	0.426781	0.506913	-0.980191	-1.97273	20.8339	41.0996	-4.17861	1.07374	0.0760303	0.426764
ATP2C2-AS1	ATP2C2-AS1	18.3064	25.2444	25.0864	6.16517	17.1059	1.8185	16	84459259	84467362	-	93.7267	25.2444	11.4244	15.6211	lncRNA	ENSG00000261286	havana	1	1	0.0882374	0.454641	0.365665	-1.4514	-2.73474	8.35917	22.8602	-8.69436	1.16253	0.0882343	0.454625
ATP5F1A	ATP5F1A	4841.91	5791.95	4758.52	6891.12	6378.82	10351.8	18	46080248	46104335	-	39014.1	10351.8	6269.41	6502.35	protein_coding	ENSG00000152234	ensembl_havana	16	1	0.00481412	0.10115	1.53461	0.617874	1.53461	7874.29	5131.13	1.13944	2.06684	0.00481318	0.10113
ATP5F1B	ATP5F1B	5945.25	6539.03	6263.68	8010.06	7600.55	10227	12	56638175	56645985	-	44585.5	10227	7302.25	7430.92	protein_coding	ENSG00000110955	ensembl_havana	9	1	0.00435843	0.0954698	1.37821	0.462797	1.37821	8612.94	6249.36	1.10546	1.71827	0.00435754	0.0954503
ATP5F1D	ATP5F1D	826.397	971.22	905.75	1457.22	1158.08	1087.19	19	1241746	1244826	+	6405.86	1457.22	1049.17	1067.64	protein_coding	ENSG00000099624	ensembl_havana	8	1	0.0109913	0.163599	1.3689	0.453018	1.3689	1233.61	901.171	1.07465	1.74373	0.0109898	0.163577
ATP5F1E	ATP5F1E	1625.07	2550.22	2098	4189.4	4393.57	2574.47	20	59025475	59032346	-	17430.7	4393.57	2727.84	2905.12	protein_coding	ENSG00000124172	ensembl_havana	10	1	0.00123937	0.0464881	1.77835	0.830538	1.77835	3718.87	2091.19	1.25399	2.52197	0.00123897	0.0464731
ATP5MC2	ATP5MC2	1438.79	1587.9	1531.59	2252.55	2150.86	2058.74	12	53632726	53677409	-	11020.4	2252.55	1807.77	1836.74	protein_coding	ENSG00000135390	ensembl_havana	21	1	6.17911e-05	0.0059007	1.41747	0.503314	1.41747	2153.74	1519.43	1.19504	1.68129	6.17465e-05	0.00589644
ATP5MD	ATP5MD	1159.82	1506.15	987.61	1729.57	1952.48	1291.09	10	103389041	103396493	-	8626.72	1952.48	1399.76	1437.79	protein_coding	ENSG00000173915	ensembl_havana	16	1	0.0556731	0.370529	1.36021	0.443827	1.36021	1657.53	1218.59	-1.00748	1.86401	0.0556702	0.37051
ATP5ME	ATP5ME	220.691	251.47	170.323	247.391	459.193	228.405	4	672436	674331	-	1577.47	459.193	250.191	262.912	protein_coding	ENSG00000169020	ensembl_havana	10	1	0.102531	0.486142	1.45319	0.539225	1.45319	311.739	214.52	-1.0778	2.27605	0.102528	0.486127
ATP5MG	ATP5MG	1666.17	2081.79	1997.67	2737.58	2416.96	2187.12	11	118401606	118431497	+	13087.3	2737.58	2155.42	2181.21	protein_coding	ENSG00000167283	ensembl_havana	8	1	0.0320158	0.285469	1.27766	0.353502	1.27766	2446.77	1915.04	1.02128	1.5984	0.0320134	0.285448
ATP5MPL	ATP5MPL	599.018	668.216	562.462	952.676	900.014	728.221	14	103912288	103928270	-	4410.61	952.676	721.082	735.101	protein_coding	ENSG00000156411	ensembl_havana	10	1	0.00585393	0.114374	1.40878	0.49445	1.40878	859.905	610.388	1.10405	1.79764	0.00585287	0.114353
ATP5PB	ATP5PB	1624.01	1886.81	1821.35	2361.35	2369.71	2321.85	1	111448864	111462774	+	12385.1	2369.71	2042.05	2064.18	protein_coding	ENSG00000116459	ensembl_havana	11	1	0.00167572	0.0558507	1.32279	0.403579	1.32279	2350.93	1777.25	1.111	1.57494	0.00167523	0.0558344
ATP5PD	ATP5PD	768.075	1100.07	957.244	1400.8	1336.25	1160.01	17	75038863	75046986	-	6722.45	1400.8	1098.4	1120.41	protein_coding	ENSG00000167863	ensembl_havana	12	1	0.0148236	0.194282	1.37893	0.463551	1.37893	1298.77	941.865	1.06488	1.7856	0.0148219	0.194259
ATP5PF	ATP5PF	644.479	883.251	859.538	1113.72	1069.97	890.142	21	25716503	25735674	-	5461.1	1113.72	896.453	910.184	protein_coding	ENSG00000154723	ensembl_havana	12	1	0.0609827	0.385204	1.28767	0.364762	1.28767	1024.33	795.494	-1.01172	1.67753	0.0609798	0.385186
ATP5PO	ATP5PO	1378.62	1650.12	1635.25	2333.94	2282.2	1680.91	21	33903453	33915815	-	10961	2333.94	1793.72	1826.84	protein_coding	ENSG00000241837	ensembl_havana	7	1	0.0203273	0.229545	1.35005	0.433009	1.35005	2098.6	1554.47	1.04771	1.73963	0.0203253	0.229522
ATP6AP2	ATP6AP2	2191.63	2492.49	2495.43	1884.73	2234.45	1754.58	X	40579372	40606849	+	13053.3	2495.43	2157.03	2175.55	protein_coding	ENSG00000182220	ensembl_havana	15	1	0.0649985	0.396998	0.818203	-0.28947	-1.22219	1957.91	2392.94	-1.5125	1.01255	0.0649955	0.39698
ATP6V0A4	ATP6V0A4	42.0364	27.5461	39.6101	8.6804	12.8574	11.9942	7	138706294	138799561	-	142.725	42.0364	19.8621	23.7874	protein_coding	ENSG00000105929	ensembl_havana	16	1	0.00193392	0.061151	0.309349	-1.69269	-3.2326	11.2328	36.3113	-6.78717	-1.53962	0.00193339	0.0611341
ATP6V0B	ATP6V0B	883.72	1082.3	1163.22	1967.19	1846.87	1054.63	1	43974487	43978296	+	7997.92	1967.19	1273.36	1332.99	protein_coding	ENSG00000117410	ensembl_havana	14	1	0.0143419	0.190632	1.5559	0.637747	1.5559	1622.51	1042.81	1.09222	2.21642	0.0143402	0.19061
ATP6V0C	ATP6V0C	2559.25	2416.99	2474.24	2935.19	2839.58	2991.64	16	2513952	2520219	+	16216.9	2991.64	2693.22	2702.82	protein_coding	ENSG00000185883	ensembl_havana	12	1	0.0376851	0.311307	1.17664	0.234676	1.17664	2922.16	2483.48	1.0093	1.37173	0.0376825	0.311286
ATP6V0D1	ATP6V0D1	984.99	1084.07	1011.38	1434.43	1169.11	1206.27	16	67438014	67481182	-	6890.25	1434.43	1139.11	1148.37	protein_coding	ENSG00000159720	ensembl_havana	12	1	0.0458959	0.340038	1.23608	0.305773	1.23608	1269.45	1026.99	1.00387	1.52201	0.0458932	0.340018
ATP6V0E2	ATP6V0E2	350.622	464.426	410.052	989.919	795.877	530.703	7	149872968	149891205	+	3541.6	989.919	550.785	590.266	protein_coding	ENSG00000171130	ensembl_havana	18	1	0.000509994	0.0264951	1.88954	0.918034	1.88954	771.721	408.418	1.3198	2.70522	0.000509778	0.0264839
ATP6V1E1	ATP6V1E1	1097.72	1311.54	1032.5	1317.25	1536.46	1441	22	17592136	17628750	-	7736.49	1536.46	1276.94	1289.41	protein_coding	ENSG00000131100	ensembl_havana	13	1	0.0496584	0.353354	1.24716	0.318652	1.24716	1431.81	1148.06	1.00033	1.55491	0.0496557	0.353334
ATP7A	ATP7A	755.699	721.533	768.436	493.699	636.44	434.361	X	77910656	78050396	+	3810.17	768.436	620.698	635.028	protein_coding	ENSG00000165240	ensembl_havana	20	1	0.00797599	0.13763	0.696786	-0.521213	-1.43516	521.481	748.41	-1.87417	-1.09898	0.00797473	0.137608
ATPAF1	ATPAF1	490.106	583.801	619.238	772.555	711.749	795.898	1	46632737	46673868	-	3973.35	795.898	653.012	662.224	protein_coding	ENSG00000123472	ensembl_havana	12	1	0.0100086	0.153961	1.348	0.430823	1.348	760.071	563.85	1.07398	1.69193	0.0100072	0.153939
ATPSCKMT	ATPSCKMT	118.466	163.5	138.635	176.863	212.147	246.738	5	10225507	10249898	-	1056.35	246.738	170.837	176.058	protein_coding	ENSG00000150756	ensembl_havana	14	1	0.0208489	0.232387	1.51231	0.596757	1.51231	212.184	140.305	1.0648	2.14791	0.0208469	0.232364
ATRX	ATRX	3002.76	2481.82	2356.79	1613.48	2180.26	2189.81	X	77504878	77786234	-	13824.9	3002.76	2265.77	2304.15	protein_coding	ENSG00000085224	ensembl_havana	22	1	0.0388408	0.315292	0.763138	-0.389984	-1.31038	1995.01	2614.21	-1.69346	-1.01395	0.0388382	0.315271
ATXN10	ATXN10	947.384	850.283	794.743	1028.43	1041.42	1039.05	22	45671798	45845308	+	5701.3	1041.42	945.058	950.217	protein_coding	ENSG00000130638	ensembl_havana	17	1	0.0672516	0.402472	1.1984	0.261109	1.1984	1036.33	864.762	-1.01294	1.45474	0.0672486	0.402454
ATXN1L	ATXN1L	942.953	863.705	1002.13	662.536	734.709	797.614	16	71845976	71885269	+	5003.65	1002.13	825.689	833.942	protein_coding	ENSG00000224470	ensembl_havana	8	1	0.0239979	0.24861	0.782332	-0.354146	-1.27823	732.016	935.685	-1.5819	-1.03285	0.0239958	0.248588
ATXN2L	ATXN2L	2832.35	2620.97	2668.08	2395.84	2207.76	2001.61	16	28823035	28837238	+	14726.6	2832.35	2437.44	2454.44	protein_coding	ENSG00000168488	ensembl_havana	18	1	0.0271231	0.264509	0.813098	-0.298499	-1.22986	2201.23	2707.21	-1.4776	-1.02366	0.0271209	0.264487
AUH	AUH	149.038	169.72	143.917	205.074	162.554	257.875	9	91213815	91361919	-	1088.18	257.875	177.518	181.363	protein_coding	ENSG00000148090	ensembl_havana	12	1	0.0996844	0.480644	1.35095	0.433972	1.35095	208.62	154.425	-1.05897	1.93268	0.0996813	0.480629
AXIN1	AXIN1	802.516	729.527	856.897	667.306	714.504	520.891	16	287440	352724	-	4291.64	856.897	706.724	715.273	protein_coding	ENSG00000103126	ensembl_havana	15	1	0.0795031	0.433139	0.796577	-0.328115	-1.25537	633.973	795.873	-1.61871	1.02713	0.0795	0.433122
AXIN2	AXIN2	260.78	231.032	200.691	283.198	258.985	927.837	17	65528563	65561649	-	2162.52	927.837	306.115	360.42	protein_coding	ENSG00000168646	ensembl_havana	13	1	0.0177122	0.213526	2.12302	1.08612	2.12302	490.286	230.938	1.13959	3.95512	0.0177103	0.213503
AZI2	AZI2	883.287	893.686	854.701	925.168	1020.76	1352.79	3	28315003	28349051	-	5930.39	1352.79	975.542	988.399	protein_coding	ENSG00000163512	ensembl_havana	14	1	0.0873403	0.452763	1.25387	0.326385	1.25387	1100.09	877.358	-1.03369	1.62515	0.0873372	0.452747
B2M	B2M	9668.36	12061.8	12799.5	15243.2	16210.2	16600.5	15	44711487	44718878	+	82583.4	16600.5	13525.6	13763.9	protein_coding	ENSG00000166710	ensembl_havana	20	1	0.00197107	0.0618158	1.39178	0.476928	1.39178	16018.1	11509.1	1.12886	1.71593	0.00197052	0.0617988
B4GALT5	B4GALT5	3342.85	3810.25	4050.79	4551.79	3922.43	8162.05	20	49632945	49713879	-	27840.2	8162.05	4426.13	4640.03	protein_coding	ENSG00000158470	ensembl_havana	5	1	0.0384145	0.313393	1.48503	0.570494	1.48503	5545.78	3734.45	1.02132	2.15929	0.038412	0.313372
B4GALT6	B4GALT6	780.538	1006.77	822.569	513.229	729.198	591.142	18	31622247	31685837	-	4443.44	1006.77	723.143	740.574	protein_coding	ENSG00000118276	ensembl_havana	11	1	0.0129336	0.180349	0.702589	-0.509248	-1.42331	611.458	870.294	-1.88009	-1.0775	0.012932	0.180327
B4GAT1	B4GAT1	647.743	701.982	775.037	812.703	927.57	875.576	11	66345374	66347630	-	4740.61	927.57	784.219	790.102	protein_coding	ENSG00000174684	ensembl_havana	7	1	0.0514035	0.35973	1.23259	0.301693	1.23259	872.174	707.595	-1.00127	1.52121	0.0514007	0.359711
B9D1	B9D1	130.041	161.966	153.404	178.801	211.952	227.454	17	19334308	19378194	-	1063.62	227.454	174.103	177.27	protein_coding	ENSG00000108641	ensembl_havana	18	1	0.0421161	0.327597	1.39003	0.475114	1.39003	206.316	148.426	1.0118	1.90964	0.0421134	0.327576
BAALC-AS1	BAALC-AS1	38.2149	31.9891	35.6491	44.487	48.6744	95.9535	8	103153394	103298773	-	294.968	95.9535	45.6541	49.1613	lncRNA	ENSG00000247081	havana	8	1	0.0667158	0.400861	1.79295	0.842332	1.79295	63.2247	35.263	-1.04106	3.34666	0.0667129	0.400843
BABAM2	BABAM2	371.641	313.67	277.271	494.784	409.601	343.548	2	27889941	28338902	+	2210.52	494.784	362.002	368.419	protein_coding	ENSG00000158019	ensembl_havana	20	1	0.100983	0.483161	1.29354	0.371328	1.29354	415.592	321.282	-1.05148	1.75939	0.10098	0.483146
BACH1	BACH1	2861.31	2703.94	3291.6	2057.25	2564.06	1769.12	21	29194071	29630752	+	15247.3	3291.6	2488.8	2541.21	protein_coding	ENSG00000156273	ensembl_havana	16	1	0.0121489	0.173389	0.721657	-0.470615	-1.3857	2130.08	2951.66	-1.78809	-1.07386	0.0121473	0.173366
BACH2	BACH2	151.904	120.848	143.917	75.9535	90.0018	89.0997	6	89926528	90296909	-	671.724	151.904	108.251	111.954	protein_coding	ENSG00000112182	ensembl_havana	15	1	0.00786132	0.136215	0.613725	-0.704336	-1.6294	85.1481	138.74	-2.33546	-1.13679	0.00786007	0.136193
BAD	BAD	878.857	1002.28	1052.25	1365.86	1339.87	1059.77	11	64269830	64284705	-	6698.87	1365.86	1102.68	1116.48	protein_coding	ENSG00000002330	ensembl_havana	13	1	0.0378	0.311376	1.2838	0.360425	1.2838	1254.79	977.399	1.01418	1.62511	0.0377974	0.311355
BAGE2	BAGE2	0.955373	2.66576	0	35.8067	2.75516	0	21	10413477	10516432	+	42.1829	35.8067	0	7.03049	transcribed_unprocessed_pseudogene	ENSG00000187172	ensembl_havana	15	1	0.0714393	0.415012	10.192	3.34937	10.192	12.797	1.25559	-1.22455	127.203	0.0714363	0.414995
BAHCC1	BAHCC1	352.533	514.491	361.772	141.057	248.883	221.036	17	81395475	81466333	+	1839.77	514.491	282.582	306.628	protein_coding	ENSG00000266074	ensembl_havana	8	1	0.000462063	0.0250132	0.497555	-1.00707	-2.00983	203.967	409.938	-2.97052	-1.35983	0.000461862	0.0250023
BAIAP2	BAIAP2	656.132	762.789	823.28	1121.88	969.943	1147.52	17	81035122	81117433	+	5481.54	1147.52	895.157	913.591	protein_coding	ENSG00000175866	ensembl_havana	15	1	0.00141622	0.0498065	1.44578	0.531848	1.44578	1079.74	746.82	1.15286	1.81313	0.00141578	0.0497911
BANF1	BANF1	2344.51	2567.12	2768.76	3723.89	3420.08	3089.39	11	66002228	66004150	+	17913.7	3723.89	2947.46	2985.62	protein_coding	ENSG00000175334	ensembl_havana	8	1	0.00442567	0.0965693	1.33256	0.414195	1.33256	3410.66	2559.49	1.09351	1.62386	0.00442477	0.0965497
BANK1	BANK1	24.8397	19.5489	9.24235	23.8711	29.3883	123.369	4	101411286	102074813	+	230.259	123.369	27.0116	38.3765	protein_coding	ENSG00000153064	ensembl_havana	12	1	0.0216244	0.23487	3.27585	1.71187	3.27585	59.0222	18.0173	1.19013	9.01682	0.0216223	0.234848
BARX2	BARX2	156.681	125.291	124.112	34.7216	90.9202	118.228	11	129375848	129452280	+	649.954	156.681	98.4287	108.326	protein_coding	ENSG00000043039	ensembl_havana	7	1	0.0987082	0.479184	0.602383	-0.731246	-1.66007	81.5752	135.421	-3.02988	1.09944	0.098705	0.479168
BAZ1A	BAZ1A	935.456	978.257	918.378	712.686	829.513	757.645	14	34752731	34875648	-	5131.93	978.257	849.73	855.322	protein_coding	ENSG00000198604	ensembl_havana	11	1	0.0356699	0.30297	0.812086	-0.300295	-1.2314	766.86	944.309	-1.49534	-1.01404	0.0356674	0.302949
BBC3	BBC3	142.351	148.394	145.237	149.737	213.984	231.316	19	47220822	47232767	-	1031.02	231.316	168.317	171.836	protein_coding	ENSG00000105327	ensembl_havana	18	1	0.0807173	0.436259	1.3672	0.451221	1.3672	198.706	145.338	-1.03896	1.94205	0.0807143	0.436242
BBS12	BBS12	123.243	171.497	178.245	172.523	224.086	338.406	4	122732702	122744943	+	1208	338.406	191.48	201.334	protein_coding	ENSG00000181004	ensembl_havana	10	1	0.0469058	0.343518	1.55787	0.639571	1.55787	245.336	157.482	1.00608	2.41227	0.046903	0.343498
BCAP29	BCAP29	908.184	990.708	959.723	1339.13	1104.2	1565.24	7	107579977	107629171	+	6867.19	1565.24	1122.33	1144.53	protein_coding	ENSG00000075790	ensembl_havana	10	1	0.00653168	0.121348	1.40243	0.487932	1.40243	1336.34	952.872	1.0991	1.78948	0.00653056	0.121327
BCAS3	BCAS3	372.595	317.225	338.006	374.342	456.438	637.407	17	60677453	61392839	+	2496.01	637.407	404.048	416.002	protein_coding	ENSG00000141376	ensembl_havana	22	1	0.0359355	0.304399	1.42975	0.515764	1.42975	489.843	342.607	1.02374	1.99678	0.035933	0.304378
BCKDHA	BCKDHA	325.782	430.062	423.826	460.058	529.907	527.698	19	41397808	41425003	+	2697.33	529.907	443.787	449.556	protein_coding	ENSG00000248098	ensembl_havana	12	1	0.0593309	0.380712	1.28794	0.365062	1.28794	506.109	392.961	-1.01001	1.67539	0.059328	0.380694
BCL7A	BCL7A	336.29	278.127	246.903	322.259	359.088	490.905	12	122019422	122062045	+	2033.57	490.905	330.863	338.929	protein_coding	ENSG00000110987	ensembl_havana	9	1	0.0707546	0.412913	1.36048	0.44412	1.36048	391.1	287.471	-1.02639	1.89977	0.0707516	0.412896
BDH2P1	BDH2P1	42.5628	39.3605	33.6173	44.8846	62.2953	72.8913	6	99174744	99175480	+	295.612	72.8913	47.4949	49.2686	processed_pseudogene	ENSG00000232699	havana	3	1	0.103354	0.488137	1.55768	0.6394	1.55768	60.1968	38.6451	-1.09429	2.65516	0.10335	0.488122
BEAN1	BEAN1	78.3406	72.864	120.151	39.0618	62.4502	68.5382	16	66427295	66493530	+	441.405	120.151	69.7013	73.5676	protein_coding	ENSG00000166546	ensembl_havana	14	1	0.0877493	0.453383	0.631683	-0.662728	-1.58307	56.8753	90.0378	-2.68234	1.07032	0.0877462	0.453367
BEND3	BEND3	471.958	450.513	532.094	319.004	432.56	230.46	6	107065182	107115270	-	2436.59	532.094	391.447	406.098	protein_coding	ENSG00000178409	ensembl_havana	13	1	0.0314517	0.282716	0.675315	-0.566368	-1.48079	327.247	484.585	-2.1175	-1.03553	0.0314493	0.282694
BEND7	BEND7	1139.76	1018.32	1076.07	991.736	849.507	553.446	10	13438484	13528975	-	5628.84	1139.76	913.825	938.14	protein_coding	ENSG00000165626	ensembl_havana	17	1	0.0659289	0.399058	0.740001	-0.434401	-1.35135	797.74	1078.03	-1.86271	1.02002	0.065926	0.39904
BEST3	BEST3	20.0628	15.9945	18.4847	6.5103	9.18386	2.57018	12	69643360	69699477	-	72.8064	20.0628	9.84679	12.1344	protein_coding	ENSG00000127325	ensembl_havana	19	1	0.0411888	0.323384	0.333252	-1.58531	-3.00073	6.05462	18.1683	-8.61719	-1.04493	0.0411861	0.323363
BET1	BET1	307.63	347.437	303.677	387.363	442.663	500.332	7	93962762	94004383	-	2289.1	500.332	375.083	381.517	protein_coding	ENSG00000105829	ensembl_havana	13	1	0.0129659	0.180652	1.38749	0.47248	1.38749	443.83	319.879	1.07161	1.79648	0.0129643	0.180629
BHLHE40	BHLHE40	5668.01	7437.97	8774.77	4929.35	5457.89	4858.35	3	4979437	4985324	+	37126.3	8774.77	6035.83	6187.72	protein_coding	ENSG00000134107	ensembl_havana	5	1	0.00643112	0.120925	0.69685	-0.52108	-1.43503	5081.89	7292.66	-1.86073	-1.10672	0.00643	0.120904
BHLHE40-AS1	BHLHE40-AS1	4.90316	10.9975	11.9717	12.0156	21.222	35.2554	3	4896809	4980415	-	96.3653	35.2554	13.4054	16.0609	lncRNA	ENSG00000235831	havana	7	1	0.0776563	0.429409	2.4865	1.31412	2.4865	22.9333	9.2231	-1.1062	6.83932	0.0776533	0.429392
BICRA	BICRA	571.312	470.063	505.688	429.68	337.965	370.963	19	47608196	47703278	+	2685.67	571.312	440.599	447.612	protein_coding	ENSG00000063169	ensembl_havana	10	1	0.0179392	0.214589	0.735375	-0.443449	-1.35985	379.233	515.7	-1.75401	-1.05427	0.0179373	0.214566
BID	BID	347.755	465.619	468.719	528.419	528.99	817.321	22	17734138	17774771	-	3156.82	817.321	508.752	526.137	protein_coding	ENSG00000015475	ensembl_havana	18	1	0.0280859	0.269047	1.46375	0.549666	1.46375	625.244	427.153	1.04182	2.05656	0.0280836	0.269025
BLOC1S1	BLOC1S1	275.045	356.737	264.053	571.186	503.008	345.45	12	55716037	55720088	+	2315.48	571.186	370.138	385.913	protein_coding	ENSG00000135441	ensembl_havana	7	1	0.0106363	0.160565	1.58154	0.66133	1.58154	472.856	298.985	1.11258	2.24817	0.0106349	0.160543
BLOC1S2	BLOC1S2	453.803	563.363	430.43	655.369	605.216	591.143	10	100273280	100286681	-	3299.32	655.369	543.594	549.887	protein_coding	ENSG00000196072	ensembl_havana	12	1	0.0503768	0.356761	1.27692	0.352674	1.27692	617.057	483.237	-1.0004	1.63119	0.050374	0.356741
BLVRB	BLVRB	258.906	309.228	261.427	405.808	459.194	313.562	19	40447765	40465765	-	2008.13	459.194	327.016	334.688	protein_coding	ENSG00000090013	ensembl_havana	11	1	0.024001	0.24861	1.41881	0.504676	1.41881	392.685	276.771	1.04713	1.9224	0.0239989	0.248588
BMERB1	BMERB1	745.191	640.669	685.254	583.757	614.399	509.755	16	15434475	15625029	+	3779.03	745.191	625.364	629.838	protein_coding	ENSG00000166780	ensembl_havana	11	1	0.090652	0.459586	0.824416	-0.278556	-1.21298	569.122	690.333	-1.51701	1.03106	0.0906489	0.45957
BMF	BMF	174.833	131.511	146.557	70.5282	87.2467	88.243	15	40087890	40108893	-	698.919	174.833	110.594	116.487	protein_coding	ENSG00000104081	ensembl_havana	14	1	0.00134545	0.0483508	0.544251	-0.877656	-1.83739	82.1694	150.977	-2.66508	-1.26675	0.00134503	0.0483356
BMP2	BMP2	1431.15	1966.44	1878.84	660.795	1101.14	525.174	20	6767686	6780247	+	7563.54	1966.44	1124.38	1260.59	protein_coding	ENSG00000125845	ensembl_havana	7	1	2.76739e-05	0.00324415	0.433492	-1.20592	-2.30685	762.388	1758.71	-3.40997	-1.56059	2.76502e-05	0.00324136
BMP2K	BMP2K	922.987	765.257	790.298	473.085	693.547	679.156	4	78776342	78916373	+	4324.33	922.987	706.528	720.722	protein_coding	ENSG00000138756	ensembl_havana	17	1	0.042422	0.328812	0.745175	-0.42435	-1.34197	615.734	826.295	-1.78285	-1.01011	0.0424194	0.328792
BMP3	BMP3	52.5455	40.8749	21.1254	14.1057	17.4493	23.1317	4	81030708	81057633	+	169.232	52.5455	25.2365	28.2054	protein_coding	ENSG00000152785	ensembl_havana	7	1	0.0564604	0.37343	0.476215	-1.07032	-2.09989	18.3037	38.4359	-4.50052	1.02063	0.0564576	0.373411
BMP4	BMP4	3052.03	3529.52	3377.41	4361.92	3608.38	6721.58	14	53949736	53958762	-	24650.8	6721.58	3958.75	4108.47	protein_coding	ENSG00000125378	ensembl_havana	16	1	0.0199896	0.227584	1.47535	0.561058	1.47535	4897.62	3319.63	1.06319	2.04728	0.0199876	0.227561
BMP6	BMP6	76.4298	89.7648	130.731	35.8067	82.6547	25.7122	6	7726099	7881729	+	441.1	130.731	63.9274	73.5166	protein_coding	ENSG00000153162	ensembl_havana	9	1	0.0389864	0.315868	0.486918	-1.03825	-2.05373	48.0809	98.7454	-4.06711	-1.03705	0.0389838	0.315847
BMS1	BMS1	1411.09	1279.56	1363.91	1082.88	1254.52	1027.22	10	42782795	42834938	+	7419.17	1411.09	1228.44	1236.53	protein_coding	ENSG00000165733	ensembl_havana	8	1	0.0716629	0.415459	0.829931	-0.268937	-1.20492	1121.55	1351.37	-1.47588	1.01656	0.0716599	0.415442
BMT2	BMT2	249.352	287.013	278.591	339.621	318.68	353.828	7	112819147	112939876	-	1827.08	353.828	302.323	304.514	protein_coding	ENSG00000164603	ensembl_havana	12	1	0.0819439	0.438806	1.24238	0.313103	1.24238	337.405	271.58	-1.02789	1.58654	0.0819408	0.438789
BNIP1	BNIP1	149.993	186.603	162.401	259.327	221.331	200.474	5	173144442	173164388	+	1180.13	259.327	193.384	196.688	protein_coding	ENSG00000113734	ensembl_havana	17	1	0.0517407	0.360594	1.36214	0.445878	1.36214	226.765	166.477	-1.00233	1.85977	0.0517379	0.360574
BOLA2	BOLA2	148.511	147.731	107.463	161.607	187.867	338.133	16	29443056	29454965	-	1091.31	338.133	170.078	181.885	protein_coding	ENSG00000183336	havana	8	1	0.0270129	0.263997	1.70176	0.767028	1.70176	229.51	134.866	1.0623	2.72615	0.0270107	0.263975
BORCS7-ASMT	BORCS7-ASMT	5.4526	4.58045	0.185332	8.0906	19.1513	12.1102	10	102854272	102901900	+	49.5705	19.1513	4.53383	8.26175	protein_coding	ENSG00000270316	havana	1	1	0.0696176	0.410107	3.72213	1.89613	3.72213	13.1461	3.53188	-1.11121	15.395	0.0696146	0.41009
BPGM	BPGM	423.229	590.016	540.018	328.77	434.394	361.539	7	134646811	134679817	+	2677.97	590.016	436.982	446.328	protein_coding	ENSG00000172331	ensembl_havana	12	1	0.0309507	0.281143	0.724522	-0.464899	-1.38022	375.08	517.693	-1.84957	-1.02997	0.0309484	0.281122
BRD4	BRD4	4677.5	3629.01	4020.41	3246.47	3358.53	2898.32	19	15235519	15332546	-	21830.2	4677.5	3594.43	3638.37	protein_coding	ENSG00000141867	ensembl_havana	17	1	0.0161076	0.203972	0.770896	-0.375391	-1.29719	3167.59	4108.97	-1.6034	-1.04946	0.0161058	0.203949
BRI3	BRI3	912.692	1008.39	1105.18	1208.94	1862.32	966.27	7	98252379	98310442	+	7063.79	1862.32	1141.54	1177.3	protein_coding	ENSG00000164713	ensembl_havana	10	1	0.106388	0.494634	1.33448	0.41628	1.33448	1345.84	1008.51	-1.06366	1.8942	0.106385	0.494619
BRPF3	BRPF3	3374.42	2833.71	2929.86	2033.4	2377.7	2655.87	6	36196744	36232791	+	16205	3374.42	2666.85	2700.83	protein_coding	ENSG00000096070	ensembl_havana	19	1	0.0235561	0.246708	0.773494	-0.370539	-1.29284	2356.18	3046.16	-1.61471	-1.03512	0.023554	0.246685
BRSK2	BRSK2	2.86612	0.888585	0	11.9356	4.59193	8.56728	11	1389899	1462690	+	28.8495	11.9356	0	4.80824	protein_coding	ENSG00000174672	ensembl_havana	16	1	0.0499853	0.355056	6.36133	2.66933	6.36133	8.34185	1.31134	1.00012	40.4617	0.0499825	0.355037
BRWD3	BRWD3	953.463	867.261	742.029	598.947	703.483	468.63	X	80669503	80809878	-	4333.81	953.463	703.436	722.302	protein_coding	ENSG00000165288	ensembl_havana	11	1	0.0117857	0.170933	0.690489	-0.53431	-1.44825	590.198	854.754	-1.93204	-1.0856	0.0117842	0.170911
BSG	BSG	7355.47	7793.54	8349.98	12707.6	10469.8	12893	19	571277	583494	+	59569.4	12893	9676.79	9928.24	protein_coding	ENSG00000172270	ensembl_havana	20	1	1.91093e-05	0.00240607	1.53507	0.618304	1.53507	12023.4	7832.46	1.26124	1.86835	1.90916e-05	0.00240385
BST2	BST2	2971.21	3355.3	3550.38	4734.07	4418.35	3223.01	19	17402939	17405631	-	22252.3	4734.07	3655.52	3708.72	protein_coding	ENSG00000130303	ensembl_havana	13	1	0.0859969	0.448633	1.25295	0.325332	1.25295	4124.65	3291.95	-1.03244	1.62082	0.0859938	0.448617
BTAF1	BTAF1	1300.25	1373.76	1213.4	826.806	872.469	1001.51	10	91923770	92030326	+	6588.18	1373.76	1077.6	1098.03	protein_coding	ENSG00000095564	ensembl_havana	14	1	0.00052967	0.0269561	0.694775	-0.525383	-1.43932	900.671	1296.35	-1.76851	-1.1714	0.000529448	0.0269448
BTC	BTC	21.9736	26.6576	22.4457	21.701	61.5319	128.509	4	74744759	74794524	-	282.819	128.509	36.2155	47.1365	protein_coding	ENSG00000174808	ensembl_havana	12	1	0.0137696	0.186945	2.98367	1.57709	2.98367	70.7775	23.7216	1.25025	7.12038	0.0137679	0.186922
BTF3	BTF3	6987.43	8763.01	7940.61	12019	11054.6	10700	5	73498408	73505636	+	57464.7	12019	9403.08	9577.45	protein_coding	ENSG00000145741	ensembl_havana	15	1	0.000353497	0.0213834	1.42552	0.511492	1.42552	11257.6	7897.14	1.17356	1.73159	0.000353331	0.0213734
BTF3L4	BTF3L4	908.708	985.173	956.571	1176.16	1234.06	1528.66	1	52056199	52090717	+	6789.33	1528.66	1112.91	1131.56	protein_coding	ENSG00000134717	ensembl_havana	18	1	0.00457359	0.0984075	1.38234	0.467113	1.38234	1313.43	950.152	1.10516	1.72904	0.00457267	0.0983877
BTN2A2	BTN2A2	570.358	646.001	785.6	385.193	411.437	544.022	6	26383096	26394875	+	3342.61	785.6	540.584	557.102	protein_coding	ENSG00000124508	ensembl_havana	17	1	0.00909607	0.146972	0.670821	-0.576	-1.49071	447.226	666.684	-2.01224	-1.10435	0.00909472	0.146951
BTN2A3P	BTN2A3P	194.896	139.508	198.05	85.719	90.9202	82.2459	6	26421391	26432384	+	791.339	198.05	122.934	131.89	transcribed_unprocessed_pseudogene	ENSG00000124549	havana	14	1	0.000122278	0.00975817	0.487177	-1.03748	-2.05264	86.2836	177.109	-2.96246	-1.42224	0.000122203	0.00975215
BUB1B	BUB1B	713.665	709.98	703.642	622.019	567.561	522.604	15	40161023	40221124	+	3839.47	713.665	635.351	639.912	protein_coding	ENSG00000156970	ensembl_havana	13	1	0.0376909	0.311307	0.804232	-0.314317	-1.24342	570.324	709.154	-1.52705	-1.01247	0.0376883	0.311286
BX088651.4	BX088651.4	21.1918	21.0565	21.9113	10.0537	3.97755	11.5884	9	42566679	42569354	-	89.7792	21.9113	12.8637	14.9632	lncRNA	ENSG00000237357	havana	2	1	0.0548599	0.369456	0.399269	-1.32457	-2.50458	8.53478	21.376	-6.39399	1.0193	0.054857	0.369437
BX324167.2	BX324167.2	16.2413	8.88585	1.32034	0	1.83677	0	22	45875932	45879248	+	28.2843	16.2413	0	4.71405	lncRNA	ENSG00000279954	havana	1	1	0.0309881	0.281143	0.0700838	-3.83477	-14.2686	0.622369	8.88035	-159.662	-1.27515	0.0309857	0.281122
BX640514.2	BX640514.2	285.657	253.247	244.262	200.734	230.515	76.2488	20	62596732	62603356	-	1290.66	285.657	199.128	215.111	lncRNA	ENSG00000273812	havana	3	1	0.108219	0.498969	0.647098	-0.627943	-1.54536	168.97	261.12	-2.62837	1.10059	0.108216	0.498955
BX679664.3	BX679664.3	611.113	879.394	916.628	1516.12	1460.36	1008.36	1	108992282	108992837	+	6391.97	1516.12	1015.98	1065.33	processed_pseudogene	ENSG00000244716	havana	3	1	0.00240065	0.0691152	1.65579	0.727516	1.65579	1327.97	802.016	1.19565	2.293	0.00240003	0.0690974
BX842568.2	BX842568.2	0.955373	1.77717	0	2.1701	6.4287	23.9884	X	36962196	36963426	-	35.3197	23.9884	0	5.88662	processed_pseudogene	ENSG00000223723	havana	1	1	0.0214386	0.233961	11.2602	3.49316	11.2602	10.9212	0.969896	1.43064	88.6255	0.0214366	0.233939
BX842570.1	BX842570.1	39.3348	36.9104	42.7199	6.73111	13.6527	20.8191	X	3819924	3823899	+	160.168	42.7199	22.1677	26.6947	lncRNA	ENSG00000286431	havana_tagene	1	1	0.00767368	0.134544	0.350601	-1.5121	-2.85224	13.8851	39.6037	-6.16327	-1.31996	0.00767245	0.134523
BX890604.2	BX890604.2	318.93	261.654	332.256	138.666	213.189	165.948	X	3817528	3937856	-	1430.64	332.256	226.777	238.44	lncRNA	ENSG00000285756	havana	2	1	0.00104845	0.0414455	0.568574	-0.81458	-1.75879	172.82	303.953	-2.46526	-1.25477	0.00104809	0.0414313
BZW1	BZW1	9110.81	8825.76	9199.44	11101.6	10364.4	9686.03	2	200810594	200827339	+	58288	11101.6	9683.32	9714.67	protein_coding	ENSG00000082153	ensembl_havana	18	1	0.0908683	0.460107	1.14797	0.199086	1.14797	10383.5	9045.07	-1.02221	1.3471	0.0908652	0.460091
BZW1P2	BZW1P2	2505.76	2573.07	2595.08	2968.34	3089.03	3297.53	3	116645902	116646728	-	17028.8	3297.53	2822.79	2838.14	processed_pseudogene	ENSG00000198406	havana	7	1	0.0150663	0.196394	1.21928	0.28603	1.21928	3118.69	2557.81	1.03915	1.43064	0.0150646	0.196371
C11orf1	C11orf1	128.02	151.948	104.307	234.371	215.821	194.477	11	111878935	111885976	+	1028.94	234.371	164.699	171.491	protein_coding	ENSG00000137720	ensembl_havana	8	1	0.00295764	0.075848	1.66901	0.738988	1.66901	214.726	128.655	1.19058	2.33968	0.00295694	0.07583
C11orf49	C11orf49	402.212	365.209	343.287	451.38	431.641	597.139	11	46936689	47164386	+	2590.87	597.139	424.684	431.812	protein_coding	ENSG00000149179	ensembl_havana	14	1	0.0442852	0.333674	1.33246	0.414096	1.33246	493.688	370.507	1.00736	1.76248	0.0442825	0.333654
C11orf54	C11orf54	598.963	706.692	638.961	933.764	903.285	774.791	11	93741591	93764750	+	4556.45	933.764	749.132	759.409	protein_coding	ENSG00000182919	ensembl_havana	14	1	0.00943838	0.149938	1.3422	0.424605	1.3422	870.282	648.398	1.07475	1.67621	0.00943701	0.149916
C11orf58	C11orf58	3125.03	3356.23	3171.45	3835.68	4141.88	5310.91	11	16613132	16758341	+	22941.2	5310.91	3755.74	3823.53	protein_coding	ENSG00000110696	ensembl_havana	10	1	0.00619664	0.118084	1.37677	0.461292	1.37677	4430.05	3217.7	1.09504	1.73099	0.00619555	0.118063
C12orf10	C12orf10	379.283	467.395	456.836	595.693	491.337	715.367	12	53299695	53307178	+	3105.91	715.367	506.862	517.652	protein_coding	ENSG00000139637	ensembl_havana	14	1	0.0265756	0.26217	1.38348	0.468299	1.38348	600.938	434.368	1.03845	1.84315	0.0265734	0.262147
C12orf43	C12orf43	438.516	437.184	446.273	480.677	485.827	793.33	12	121000486	121016503	-	3081.81	793.33	501.195	513.635	protein_coding	ENSG00000157895	ensembl_havana	11	1	0.0916146	0.461825	1.33225	0.413861	1.33225	587.013	440.619	-1.04752	1.85923	0.0916115	0.461809
C12orf45	C12orf45	218.78	172.386	212.574	231.116	294.802	415.513	12	104986316	105074198	+	1545.17	415.513	246.979	257.528	protein_coding	ENSG00000151131	ensembl_havana	11	1	0.0213348	0.233911	1.56259	0.643943	1.56259	314.194	201.072	1.06857	2.28502	0.0213328	0.233889
C12orf57	C12orf57	653.472	839.469	749.118	1290.04	1090.92	957.556	12	6942978	6946004	+	5580.57	1290.04	906.199	930.095	protein_coding	ENSG00000111678	ensembl_havana	11	1	0.00239406	0.0690905	1.48823	0.5736	1.48823	1112.38	747.449	1.15137	1.92365	0.00239345	0.0690727
C14orf119	C14orf119	994.542	1273.34	1142.09	1521.24	1637.48	1143.73	14	23095505	23100457	+	7712.43	1637.48	1266.18	1285.4	protein_coding	ENSG00000179933	ensembl_havana	6	1	0.090657	0.459586	1.26141	0.335037	1.26141	1433.88	1136.73	-1.03747	1.65078	0.0906539	0.45957
C15orf41	C15orf41	153.815	143.062	132.034	195.309	174.493	186.767	15	36579626	36810249	+	985.48	195.309	162.618	164.247	protein_coding	ENSG00000186073	ensembl_havana	14	1	0.0878537	0.453488	1.29476	0.372683	1.29476	185.441	143.224	-1.03906	1.74187	0.0878506	0.453472
C15orf54	C15orf54	15.286	2.66576	6.60168	0	0	2.57018	15	39250684	39254846	+	27.1236	15.286	0	4.5206	lncRNA	ENSG00000175746	ensembl_havana	6	1	0.0555724	0.37018	0.10918	-3.19522	-9.15921	0.894132	8.18955	-88.4347	1.05416	0.0555696	0.370161
C16orf46	C16orf46	8.46649	2.67586	4.46528	41.3842	5.46165	37.2199	16	81053497	81077268	-	99.6734	41.3842	9.73475	16.6122	protein_coding	ENSG00000166455	ensembl_havana	13	1	0.00996619	0.153865	5.37243	2.42557	5.37243	27.9867	5.20932	1.49567	19.2977	0.00996477	0.153843
C16orf54	C16orf54	0	0	0	18.4459	0.918386	21.4182	16	29742463	29745991	-	40.7824	21.4182	0	6.79707	protein_coding	ENSG00000185905	ensembl_havana	4	1	0.00108653	0.0427521	71.12	6.15218	71.12	13.5892	0.191074	5.50789	918.329	0.00108617	0.0427377
C16orf86	C16orf86	1.91075	0.888585	5.28134	7.59535	11.939	7.71055	16	67666814	67668758	+	35.3256	11.939	4.29413	5.8876	protein_coding	ENSG00000159761	ensembl_havana	15	1	0.100913	0.483052	3.54102	1.82417	3.54102	9.08946	2.5669	-1.27926	16.0404	0.10091	0.483037
C17orf49	C17orf49	811.442	811.149	873.229	1321.31	1163.91	1016.48	17	7014495	7017526	+	5997.51	1321.31	982.316	999.586	protein_coding	ENSG00000258315	ensembl_havana	5	1	0.00262419	0.0727667	1.40296	0.488472	1.40296	1166.7	831.6	1.12526	1.74918	0.00262354	0.0727486
C17orf58	C17orf58	142.351	151.948	135.995	226.775	230.515	172.202	17	67991101	67996432	-	1059.79	230.515	172.644	176.631	protein_coding	ENSG00000186665	ensembl_havana	9	1	0.0212169	0.233804	1.45965	0.545622	1.45965	209.621	143.611	1.05811	2.01356	0.0212149	0.233782
C19orf25	C19orf25	272.281	292.344	334.045	469.826	435.315	351.258	19	1461143	1479220	-	2155.07	469.826	352.247	359.178	protein_coding	ENSG00000119559	ensembl_havana	17	1	0.0182451	0.216169	1.39909	0.484493	1.39909	418.461	299.094	1.05865	1.84901	0.0182432	0.216146
C19orf33	C19orf33	1588.32	2036.46	2179.78	4161.87	3665	3058.89	19	38304164	38305007	+	16690.3	4161.87	2627.4	2781.72	protein_coding	ENSG00000167644	ensembl_havana	12	1	2.50911e-06	0.000533122	1.87567	0.907403	1.87567	3628.16	1934.33	1.44354	2.43714	2.50575e-06	0.00053241
C1QTNF3-AMACR	C1QTNF3-AMACR	19.0288	0.437102	49.6031	0.0034241	0.000624578	7.30053	5	33987174	34124529	-	76.3736	49.6031	0.431352	12.7289	protein_coding	ENSG00000273294	havana	1	1	0.0562065	0.372606	0.108034	-3.21044	-9.2563	2.47786	22.9359	-90.8767	1.06066	0.0562037	0.372587
C1RL	C1RL	97.4481	103.076	106.947	144.312	132.248	193.62	12	7089587	7109239	-	777.651	193.62	125.832	129.608	protein_coding	ENSG00000139178	ensembl_havana	11	1	0.0239053	0.24841	1.53228	0.615682	1.53228	156.906	102.4	1.05806	2.21905	0.0239032	0.248387
C1orf116	C1orf116	13.3752	11.5516	6.60168	1.08505	0.918386	0	1	207018522	207032757	-	33.5319	13.3752	0	5.58866	protein_coding	ENSG00000182795	ensembl_havana	13	1	0.00504481	0.104194	0.0607348	-4.04133	-16.465	0.641773	10.5668	-116.646	-2.32411	0.00504384	0.104174
C1orf147	C1orf147	14.3306	7.10868	15.844	4.3402	1.83677	0.856728	1	206491116	206497729	-	44.317	15.844	4.7176	7.38617	lncRNA	ENSG00000162888	havana	4	1	0.0213695	0.233911	0.184638	-2.43723	-5.41601	2.28233	12.3611	-22.8302	-1.28484	0.0213674	0.233889
C1orf174	C1orf174	562.716	528.71	538.697	784.487	630.931	704.227	1	3889125	3900294	-	3749.77	784.487	618.285	624.961	protein_coding	ENSG00000198912	ensembl_havana	11	1	0.0194692	0.224515	1.29964	0.378108	1.29964	706.217	543.396	1.04313	1.61921	0.0194672	0.224493
C1orf216	C1orf216	496.794	557.143	509.65	759.535	625.421	669.961	1	35713877	35718895	-	3618.5	759.535	596.162	603.084	protein_coding	ENSG00000142686	ensembl_havana	8	1	0.0163126	0.204939	1.31304	0.392907	1.31304	684.632	521.411	1.05138	1.63981	0.0163108	0.204916
C1orf43	C1orf43	1620.33	1966.44	2076.89	2508.62	2436.47	2359.43	1	154206696	154220638	-	12968.2	2508.62	2137.72	2161.36	protein_coding	ENSG00000143612	ensembl_havana	20	1	0.0147967	0.194282	1.29011	0.367491	1.29011	2434.7	1887.21	1.05116	1.58338	0.014795	0.194259
C21orf62-AS1	C21orf62-AS1	20.0628	22.2146	44.8914	9.76545	22.0413	5.14037	21	32772100	32955438	+	124.116	44.8914	16.7566	20.686	lncRNA	ENSG00000205930	havana	10	1	0.0955521	0.471214	0.426584	-1.2291	-2.34421	12.3133	28.8648	-6.38361	1.16165	0.095549	0.471199
C22orf23	C22orf23	11.5549	10.5503	23.0692	29.8093	30.4576	30.025	22	37943050	37953670	-	135.466	30.4576	20.611	22.5777	protein_coding	ENSG00000128346	ensembl_havana	11	1	0.076635	0.428378	2.03524	1.0252	2.03524	30.0994	14.7892	-1.07899	4.46936	0.0766319	0.428361
C22orf39	C22orf39	191.049	243.431	217.187	262.583	275.535	339.264	22	19351368	19448233	-	1529.05	339.264	250.643	254.841	protein_coding	ENSG00000242259	ensembl_havana	8	1	0.0509553	0.358788	1.34709	0.429844	1.34709	292.723	217.3	-1.00124	1.81689	0.0509525	0.358769
C2orf69	C2orf69	498.705	457.621	485.884	390.618	370.109	401.027	2	199911293	199955936	+	2603.96	498.705	431.211	433.994	protein_coding	ENSG00000178074	ensembl_havana	6	1	0.047166	0.343794	0.805796	-0.311514	-1.24101	387.267	480.601	-1.53595	-1.00271	0.0471632	0.343774
C2orf88	C2orf88	28.6612	11.5516	21.1254	11.9356	45.9193	131.079	2	189879609	190203485	+	250.272	131.079	28.1959	41.7121	protein_coding	ENSG00000187699	ensembl_havana	10	1	0.0406414	0.320748	3.09214	1.62861	3.09214	63.1311	20.4167	1.04926	9.11242	0.0406388	0.320727
C3	C3	24.8397	34.6548	3.96101	6.5103	5.51032	0	19	6677704	6730563	-	75.4761	34.6548	0	12.5794	protein_coding	ENSG00000125730	ensembl_havana	17	1	0.0396744	0.318122	0.185951	-2.42701	-5.37777	3.95609	21.2749	-26.7114	-1.0827	0.0396718	0.318101
C3orf38	C3orf38	499.661	476.282	463.439	568.565	515.215	832.736	3	88149959	88168730	+	3355.9	832.736	547.395	559.316	protein_coding	ENSG00000179021	ensembl_havana	10	1	0.0706371	0.412762	1.33189	0.413472	1.33189	639.169	479.897	-1.02442	1.81724	0.0706341	0.412745
C4A	C4A	278.827	151.931	175.634	96.1769	111.42	91.9714	6	31982057	32002682	+	905.96	278.827	139.384	150.993	protein_coding	ENSG00000244731	ensembl_havana	8	1	0.00125224	0.0467815	0.493687	-1.01833	-2.02557	99.8611	202.276	-3.10991	-1.31931	0.00125184	0.0467664
C4orf48	C4orf48	365.908	453.178	400.062	558.8	772.363	381.243	4	2041993	2043971	+	2931.56	772.363	470.986	488.593	protein_coding	ENSG00000243449	ensembl_havana	6	1	0.0797848	0.433596	1.40407	0.489615	1.40407	570.7	406.461	-1.04112	2.05248	0.0797818	0.433579
C5orf22	C5orf22	401.257	342.994	363.093	418.829	439.908	629.694	5	31532287	31555054	+	2595.77	629.694	423.847	432.629	protein_coding	ENSG00000082213	ensembl_havana	18	1	0.0579668	0.377614	1.34517	0.427789	1.34517	496.535	369.124	-1.01006	1.82769	0.0579639	0.377596
C6orf132	C6orf132	785.317	521.6	866.14	559.886	508.786	369.25	6	42101119	42142621	-	3610.98	866.14	578.079	601.83	protein_coding	ENSG00000188112	ensembl_havana	9	1	0.0227507	0.241849	0.661873	-0.595375	-1.51086	479.023	723.739	-2.15504	-1.05924	0.0227486	0.241827
C6orf141	C6orf141	308.586	237.252	377.616	48.8273	103.778	78.819	6	49550646	49561908	+	1154.88	377.616	149.224	192.48	protein_coding	ENSG00000197261	ensembl_havana	11	1	3.48692e-09	3.70441e-06	0.251723	-1.99009	-3.97262	77.3789	307.397	-6.2783	-2.51369	3.47572e-09	3.69252e-06
C6orf15	C6orf15	21.9736	20.4375	10.5627	4.3402	0.918386	10.2807	6	31111223	31112576	-	68.5131	21.9736	7.61103	11.4188	protein_coding	ENSG00000204542	ensembl_havana	3	1	0.0633926	0.393122	0.29423	-1.76498	-3.3987	5.22113	17.7451	-12.3668	1.07061	0.0633896	0.393104
C6orf223	C6orf223	74.5191	47.095	85.8218	26.0412	60.6135	11.1375	6	44000580	44007613	+	305.228	85.8218	41.7487	50.8713	protein_coding	ENSG00000181577	ensembl_havana	16	1	0.0806584	0.43621	0.472218	-1.08248	-2.11767	32.588	69.0105	-4.91433	1.09584	0.0806553	0.436193
C6orf52	C6orf52	44.9025	43.5407	34.3287	53.1675	62.4502	70.2517	6	10671418	10694798	-	308.641	70.2517	50.0161	51.4402	protein_coding	ENSG00000137434	ensembl_havana	11	1	0.10398	0.489472	1.5094	0.593976	1.5094	62.0721	41.1237	-1.08829	2.47944	0.103977	0.489457
C7orf31	C7orf31	122.288	77.3069	95.0641	59.6778	63.3687	55.6873	7	25134692	25180357	-	473.393	122.288	75.7723	78.8988	protein_coding	ENSG00000153790	ensembl_havana	12	1	0.0276708	0.267092	0.606482	-0.721464	-1.64885	59.5595	98.205	-2.57335	-1.05649	0.0276685	0.26707
C8orf33	C8orf33	957.283	1092.07	994.215	1348.72	1282.06	2035.58	8	145052465	145066686	+	7709.92	2035.58	1241.31	1284.99	protein_coding	ENSG00000182307	ensembl_havana	14	1	0.00484298	0.101506	1.5334	0.616734	1.5334	1555.85	1014.64	1.13893	2.06449	0.00484203	0.101486
C9orf16	C9orf16	337.893	377.759	365.745	696.012	484.698	335.837	9	128160265	128163925	+	2597.94	696.012	417.412	432.991	protein_coding	ENSG00000171159	ensembl_havana	5	1	0.085018	0.447024	1.40109	0.486547	1.40109	505.028	360.454	-1.04764	2.05657	0.0850149	0.447008
C9orf85	C9orf85	148.083	169.72	120.151	240.881	189.187	257.018	9	71911510	71986055	+	1125.04	257.018	181.177	187.507	protein_coding	ENSG00000155621	ensembl_havana	15	1	0.0113861	0.167134	1.56334	0.644629	1.56334	229.022	146.496	1.10601	2.20976	0.0113846	0.167112
CA12	CA12	723.219	684.209	697.137	1236.96	959.71	1351.06	15	63321378	63381847	-	5652.29	1351.06	906.061	942.049	protein_coding	ENSG00000074410	ensembl_havana	14	1	3.35063e-05	0.00372248	1.68573	0.753377	1.68573	1182.59	701.53	1.31716	2.15744	3.34787e-05	0.00371941
CA5BP1	CA5BP1	213.478	164.914	263.637	101.443	125.545	157.496	X	15674932	15703725	+	1026.51	263.637	162.799	171.086	transcribed_unprocessed_pseudogene	ENSG00000186312	havana	10	1	0.0131014	0.181794	0.601547	-0.73325	-1.66238	128.414	213.472	-2.48373	-1.11265	0.0130998	0.181772
CABLES1	CABLES1	127.065	95.9672	109.588	270.177	180.003	517.462	18	23134564	23260468	+	1300.26	517.462	179.661	216.71	protein_coding	ENSG00000134508	ensembl_havana	12	1	9.38327e-05	0.00805539	2.91131	1.54167	2.91131	322.744	110.859	1.70304	4.97683	9.37711e-05	0.00805011
CACNA1C	CACNA1C	8.59836	7.10868	17.1644	1.08505	0	0	12	1970786	2697951	+	33.9565	17.1644	0	5.65941	protein_coding	ENSG00000151067	havana	22	1	0.00194267	0.061151	0.031254	-4.99981	-31.9959	0.339871	10.8745	-286.432	-3.5741	0.00194213	0.0611341
CACNA1D	CACNA1D	22.9564	21.6399	22.8401	2.1701	4.59193	8.75005	3	53328963	53813734	+	82.9484	22.9564	9.98214	13.8247	protein_coding	ENSG00000157388	ensembl_havana	19	1	0.00486897	0.101799	0.234427	-2.09279	-4.26572	5.26766	22.4704	-11.7094	-1.554	0.00486802	0.101779
CACNA2D4	CACNA2D4	60.1885	55.9809	85.8218	185.544	260.822	63.3979	12	1791963	1918667	-	711.754	260.822	98.0248	118.626	protein_coding	ENSG00000151062	ensembl_havana	15	1	0.00721573	0.128147	2.52968	1.33896	2.52968	169.817	67.1298	1.28538	4.97852	0.00721454	0.128126
CACNG4	CACNG4	12.4198	7.10868	13.2034	0	2.75516	1.71346	17	66964707	67033399	+	37.2005	13.2034	0	6.20008	protein_coding	ENSG00000075461	ensembl_havana	6	1	0.0182028	0.216169	0.140941	-2.82684	-7.09518	1.53168	10.8676	-36.0779	-1.39536	0.0182009	0.216146
CADM1	CADM1	184.387	94.19	146.557	37.9768	90.0018	71.9652	11	115169218	115504958	-	625.078	184.387	92.4923	104.18	protein_coding	ENSG00000182985	ensembl_havana	17	1	0.00986786	0.153076	0.471988	-1.08318	-2.1187	66.8414	141.617	-3.74742	-1.19786	0.00986645	0.153054
CADPS2	CADPS2	227.379	209.706	205.972	335.28	367.354	839.593	7	122318411	122886760	-	2185.28	839.593	317.046	364.214	protein_coding	ENSG00000081803	ensembl_havana	16	1	0.000465474	0.0251179	2.39941	1.26268	2.39941	514.426	214.397	1.46976	3.91708	0.000465272	0.025107
CALHM2	CALHM2	321.006	388.982	344.093	627.455	389.121	742.466	10	103446786	103452403	-	2813.12	742.466	445.222	468.854	protein_coding	ENSG00000138172	ensembl_havana	11	1	0.00605781	0.116148	1.66844	0.7385	1.66844	586.379	351.453	1.1576	2.40471	0.00605673	0.116127
CALHM5	CALHM5	79.296	53.3151	118.83	39.0618	65.2054	29.9855	6	116511639	116524789	+	385.694	118.83	58.0759	64.2823	protein_coding	ENSG00000178033	ensembl_havana	6	1	0.0568247	0.374415	0.536344	-0.898771	-1.86448	44.7513	83.4378	-3.53973	1.01825	0.0568218	0.374396
CALM2	CALM2	11599.4	13387.6	12201.8	18948.8	17795.4	11529.1	2	47160083	47176922	-	85462.1	18948.8	13948.9	14243.7	protein_coding	ENSG00000143933	ensembl_havana	18	1	0.0751385	0.424195	1.29801	0.376302	1.29801	16090.6	12396.4	-1.02679	1.72996	0.0751354	0.424178
CALM3	CALM3	5418.72	4784.99	5776.53	6401.81	6307.46	6588.54	19	46601074	46610783	+	35278	6588.54	5844.29	5879.67	protein_coding	ENSG00000160014	ensembl_havana	17	1	0.0365165	0.307426	1.20785	0.272439	1.20785	6432.66	5325.72	1.01192	1.44172	0.0365139	0.307405
CAMSAP1	CAMSAP1	1584	1371.08	1592.33	1249.97	1078.19	1179.71	9	135808487	135907547	-	8055.28	1592.33	1328.53	1342.55	protein_coding	ENSG00000130559	ensembl_havana	19	1	0.0108248	0.162602	0.771516	-0.374231	-1.29615	1169.06	1515.27	-1.58234	-1.06172	0.0108233	0.16258
CAPN8	CAPN8	9.55373	0.888585	1.32034	0	0	0	1	223538007	223665724	-	11.7627	9.55373	0	1.96044	protein_coding	ENSG00000203697	ensembl_havana	12	1	0.0713889	0.41494	0.0443113	-4.49618	-22.5676	0.174496	3.93797	-668.049	1.31171	0.0713859	0.414922
CAPNS1	CAPNS1	7366.98	7656.93	5900.66	10993.1	10190.7	11599.1	19	36139953	36150354	+	53707.4	11599.1	8696.24	8951.23	protein_coding	ENSG00000126247	ensembl_havana	11	1	2.94891e-05	0.00336607	1.56645	0.647499	1.56645	10927.7	6976.06	1.26902	1.9336	2.94642e-05	0.00336322
CAPRIN1	CAPRIN1	7053.45	6290.27	6022	7056.06	6891.53	13862.1	11	34051731	34102611	+	47175.4	13862.1	7514.84	7862.57	protein_coding	ENSG00000135387	ensembl_havana	21	1	0.0604512	0.384131	1.43606	0.522119	1.43606	9270.32	6455.37	-1.01603	2.09533	0.0604483	0.384112
CAPZA1	CAPZA1	3387.75	3285.1	3295.56	4109.09	3845.28	5059.83	1	112619805	112671617	+	22982.6	5059.83	3783.26	3830.43	protein_coding	ENSG00000116489	ensembl_havana	13	1	0.0125617	0.176611	1.30564	0.384757	1.30564	4338.44	3322.85	1.05894	1.60981	0.0125601	0.176589
CAPZA1P1	CAPZA1P1	107.002	79.9727	71.2981	124.762	86.3283	234.683	X	88096393	88097226	-	704.046	234.683	107.487	117.341	processed_pseudogene	ENSG00000230956	havana	2	1	0.0630567	0.392008	1.72502	0.786613	1.72502	148.756	86.2344	-1.03012	3.06533	0.0630537	0.391989
CAPZA2	CAPZA2	1894.5	2124.6	2239.26	2834.13	2784.54	2270.29	7	116811070	116922050	+	14147.3	2834.13	2333.58	2357.89	protein_coding	ENSG00000198898	ensembl_havana	14	1	0.0342517	0.295688	1.26064	0.334158	1.26064	2629.26	2085.65	1.01734	1.56213	0.0342492	0.295667
CAPZB	CAPZB	3497.6	3194.48	3221.6	4203.46	4147.4	4735.17	1	19338775	19485540	-	22999.7	4735.17	3791.64	3833.29	protein_coding	ENSG00000077549	ensembl_havana	19	1	0.00181315	0.0582606	1.32002	0.400557	1.32002	4362.33	3304.75	1.1087	1.57161	0.00181263	0.058244
CARD11	CARD11	300.942	345.66	388.179	179.033	148.778	214.182	7	2906141	3043946	-	1576.77	388.179	247.592	262.796	protein_coding	ENSG00000198286	ensembl_havana	9	1	6.7164e-05	0.00623855	0.52469	-0.930464	-1.90589	180.773	344.533	-2.61708	-1.38796	6.71164e-05	0.00623413
CARD8	CARD8	953.47	782.875	909.735	498.218	576.812	687.943	19	48180770	48255947	-	4409.05	953.47	715.572	734.842	protein_coding	ENSG00000105483	ensembl_havana	18	1	0.00214669	0.0645096	0.666956	-0.584335	-1.49935	588.111	881.782	-1.94193	-1.15764	0.00214612	0.0644924
CARD8-AS1	CARD8-AS1	215.914	157.28	204.652	113.93	114.798	98.5237	19	48255675	48258200	+	905.098	215.914	144.106	150.85	lncRNA	ENSG00000268001	havana	1	1	0.00123534	0.0464881	0.566616	-0.819556	-1.76486	108.991	192.354	-2.49107	-1.25036	0.00123494	0.0464731
CASC9	CASC9	0	0	0	0	0.918386	38.5528	8	75223127	75324742	-	39.4712	38.5528	0	6.57853	lncRNA	ENSG00000249395	havana	3	1	0.0120738	0.172753	69.0079	6.10869	69.0079	13.1857	0.191075	2.52912	1882.9	0.0120722	0.17273
CASD1	CASD1	217.825	231.032	231.059	268.007	275.516	297.285	7	94509219	94557020	+	1520.72	297.285	251.861	253.454	protein_coding	ENSG00000127995	ensembl_havana	17	1	0.0943567	0.468695	1.23772	0.307684	1.23772	280.423	226.565	-1.03728	1.58906	0.0943535	0.46868
CASK	CASK	907.606	725.973	887.267	368.917	549.194	562.014	X	41514934	41923646	-	4000.97	907.606	636.618	666.829	protein_coding	ENSG00000147044	ensembl_havana	21	1	0.000579044	0.0285292	0.587903	-0.766351	-1.70096	493.841	840.004	-2.30189	-1.25691	0.000578807	0.0285176
CASP7	CASP7	522.589	533.15	517.573	430.765	473.888	348.689	10	113679162	113730908	+	2826.65	533.15	466.182	471.109	protein_coding	ENSG00000165806	ensembl_havana	21	1	0.0762893	0.427129	0.796113	-0.328955	-1.2561	417.574	524.516	-1.61628	1.02439	0.0762862	0.427112
CASQ1	CASQ1	0.955373	0	0	24.9562	0	0	1	160190575	160201887	+	25.9115	24.9562	0	4.31859	protein_coding	ENSG00000143318	ensembl_havana	13	1	0.0996782	0.480644	22.2714	4.47712	22.2714	8.28857	0.372162	-1.80582	895.714	0.0996751	0.480629
CAST	CAST	7141.36	7496.1	6234.64	8337.33	7900.94	16153.2	5	96525267	96779596	+	53263.6	16153.2	8415.22	8877.26	protein_coding	ENSG00000153113	ensembl_havana	23	1	0.0233237	0.24601	1.5519	0.63404	1.5519	10797.6	6957.62	1.06152	2.26882	0.0233216	0.245987
CAT	CAT	1277.34	1458.17	1464.25	1541.86	1847.79	2766.37	11	34438934	34472061	+	10355.8	2766.37	1667.46	1725.96	protein_coding	ENSG00000121691	ensembl_havana	7	1	0.0198139	0.226409	1.46629	0.552173	1.46629	2052.52	1399.81	1.06265	2.02326	0.0198119	0.226386
CAV1	CAV1	12648.3	12774.3	11883.8	23389	19150	20661.9	7	116525001	116561185	+	100507	23389	16154	16751.2	protein_coding	ENSG00000105974	ensembl_havana	12	1	1.16271e-08	9.88187e-06	1.694	0.760433	1.694	21066.5	12435.9	1.41344	2.03025	1.15945e-08	9.85415e-06
CAV2	CAV2	3028.54	3392.61	2664.44	4352.16	3897.63	4892.72	7	116287380	116508542	+	22228.1	4892.72	3625.81	3704.68	protein_coding	ENSG00000105971	ensembl_havana	15	1	0.00113379	0.0443037	1.44614	0.532212	1.44614	4380.98	3029.42	1.1581	1.80584	0.00113341	0.044289
CAVIN3	CAVIN3	2796.73	2806.52	2930.06	4726.74	3742.06	3078.28	11	6318946	6320533	-	20080.4	4726.74	3283.06	3346.73	protein_coding	ENSG00000170955	ensembl_havana	10	1	0.0204184	0.229545	1.35302	0.436184	1.35302	3848.37	2844.28	1.04787	1.74703	0.0204164	0.229522
CBL	CBL	2528.87	2072.17	2356.8	1806.6	2026.86	1732.32	11	119206298	119313927	+	12523.6	2528.87	2068.54	2087.27	protein_coding	ENSG00000110395	ensembl_havana	7	1	0.0320097	0.285469	0.800025	-0.321882	-1.24996	1855.27	2319.01	-1.53272	-1.01936	0.0320073	0.285448
CBX4	CBX4	342.979	358.1	382.897	509.974	473.887	646.83	17	79833156	79839441	-	2714.67	646.83	440.955	452.444	protein_coding	ENSG00000141582	ensembl_havana	15	1	0.00253904	0.0713365	1.5062	0.590913	1.5062	543.835	361.065	1.15448	1.96507	0.0025384	0.0713185
CBY1	CBY1	227.379	268.353	195.41	307.069	337.966	332.896	22	38656636	38673855	+	1669.07	337.966	272.774	278.179	protein_coding	ENSG00000100211	ensembl_havana	10	1	0.0166455	0.207434	1.41128	0.497008	1.41128	326.097	231.064	1.06451	1.87103	0.0166437	0.207412
CCDC103	CCDC103	4.60149	4.15988	0.557469	24.0494	8.44342	14.9114	17	44899142	44905391	+	56.723	24.0494	5.64361	9.45384	protein_coding	ENSG00000167131	ensembl_havana	17	1	0.0206605	0.231044	4.88566	2.28855	4.88566	15.7491	3.22355	1.27479	18.7244	0.0206584	0.231021
CCDC120	CCDC120	287.568	232.809	388.179	133.461	192.861	122.512	X	49053572	49069858	+	1357.39	388.179	208.413	226.232	protein_coding	ENSG00000147144	ensembl_havana	13	1	0.000680753	0.0311899	0.495141	-1.01409	-2.01963	149.644	302.226	-3.02963	-1.34634	0.000680488	0.0311777
CCDC121	CCDC121	42.0364	30.2119	22.4457	47.7422	46.8377	60.5328	2	27625639	27629013	-	249.807	60.5328	39.6039	41.6345	protein_coding	ENSG00000176714	ensembl_havana	9	1	0.104739	0.491134	1.62818	0.703261	1.62818	51.7648	31.793	-1.10679	2.93407	0.104736	0.49112
CCDC122	CCDC122	26.7504	23.9918	18.4847	37.9768	36.7354	62.5411	13	43823909	43879741	-	206.48	62.5411	31.805	34.4134	protein_coding	ENSG00000151773	ensembl_havana	13	1	0.0403313	0.320343	1.97588	0.982494	1.97588	45.8617	23.2108	1.03047	3.78864	0.0403287	0.320322
CCDC127	CCDC127	678.315	693.985	701.098	818.128	727.362	1042.64	5	196868	218154	-	4661.53	1042.64	767.734	776.921	protein_coding	ENSG00000164366	ensembl_havana	4	1	0.088389	0.455114	1.24878	0.320519	1.24878	862.993	691.069	-1.03394	1.61238	0.0883859	0.455098
CCDC144B	CCDC144B	348.29	314.227	315.428	128.286	144.399	351.765	17	18537800	18625618	-	1602.4	351.765	246.612	267.066	transcribed_unprocessed_pseudogene	ENSG00000154874	havana	15	1	0.0951907	0.470467	0.639479	-0.645031	-1.56377	208.477	326.011	-2.64393	1.08119	0.0951875	0.470451
CCDC15	CCDC15	244.575	212.372	190.128	179.033	161.636	108.805	11	124954121	125041490	+	1096.55	244.575	177.329	182.758	protein_coding	ENSG00000149548	ensembl_havana	15	1	0.0547396	0.368973	0.692433	-0.530254	-1.44418	149.529	215.947	-2.1013	1.0075	0.0547367	0.368954
CCDC150	CCDC150	85.9836	55.0923	40.9304	43.402	21.1229	37.696	2	196639554	196763491	+	284.227	85.9836	43.4195	47.3712	protein_coding	ENSG00000144395	ensembl_havana	18	1	0.0836579	0.443261	0.558388	-0.840659	-1.79087	34.001	60.8913	-3.46571	1.0806	0.0836549	0.443245
CCDC153	CCDC153	2.86612	8.88585	7.92202	24.9562	15.6126	25.7018	11	119189638	119196770	-	85.9445	25.7018	11.2437	14.3241	protein_coding	ENSG00000248712	ensembl_havana	7	1	0.0162636	0.204722	3.38447	1.75893	3.38447	22.0789	6.5236	1.25203	9.14885	0.0162617	0.2047
CCDC22	CCDC22	503.482	451.401	361.772	353.726	324.19	202.188	X	49235470	49250521	+	2196.76	503.482	352.128	366.127	protein_coding	ENSG00000101997	ensembl_havana	13	1	0.0310629	0.28136	0.667046	-0.584143	-1.49915	293.034	439.301	-2.16611	-1.03755	0.0310605	0.281339
CCDC24	CCDC24	146.172	152.892	116.19	245.221	185.514	159.351	1	43991359	43996529	+	1005.34	245.221	163.099	167.557	protein_coding	ENSG00000159214	ensembl_havana	13	1	0.0672918	0.402472	1.41465	0.50044	1.41465	196.361	138.806	-1.025	2.05125	0.0672888	0.402454
CCDC39	CCDC39	39.1703	34.6548	47.5321	17.3608	13.7758	18.848	3	180602858	180870934	-	171.342	47.5321	25.7401	28.557	lncRNA | protein_coding	ENSG00000145075 | ENSG00000284862	ensembl_havana | havana	13 | 3	1	0.00795976	0.1375	0.413595	-1.27371	-2.41783	16.6646	40.2921	-4.64092	-1.25964	0.0079585	0.137478
CCDC59	CCDC59	639.145	630.006	578.307	692.261	696.134	993.807	12	82223681	82358806	-	4229.66	993.807	693.79	704.943	protein_coding	ENSG00000133773	ensembl_havana	12	1	0.0722763	0.417115	1.28958	0.366896	1.28958	794.48	616.079	-1.02327	1.70171	0.0722733	0.417097
CCDC69	CCDC69	5011.01	5390.16	5497.78	3308.38	4285.12	1170.29	5	151181052	151224094	-	24662.7	5497.78	3675.06	4110.46	protein_coding	ENSG00000198624	ensembl_havana	13	1	0.0224378	0.240023	0.551186	-0.859388	-1.81427	2921.07	5299.61	-3.02558	-1.08791	0.0224357	0.240001
CCDC71	CCDC71	342.024	353.657	359.131	394.958	415.11	583.432	3	49162535	49166332	-	2448.31	583.432	400.958	408.052	protein_coding	ENSG00000177352	ensembl_havana	10	1	0.0635835	0.393445	1.3225	0.403271	1.3225	464.904	351.533	-1.01593	1.77687	0.0635806	0.393427
CCDC71L	CCDC71L	684.047	722.422	950.639	448.126	642.87	467.773	7	106654360	106661159	-	3915.88	950.639	631.309	652.646	protein_coding	ENSG00000253276	ensembl_havana	4	1	0.00897593	0.146516	0.662111	-0.594854	-1.51032	519.737	784.969	-2.05772	-1.10854	0.00897458	0.146494
CCDC80	CCDC80	2184.94	2118.39	2315.87	1474.58	2113.2	1046.92	3	112596794	112649531	-	11253.9	2315.87	1808.34	1875.65	protein_coding	ENSG00000091986	ensembl_havana	15	1	0.0430738	0.331084	0.700197	-0.514167	-1.42817	1544.81	2206.25	-2.01714	-1.01117	0.0430711	0.331063
CCDC88A	CCDC88A	3843.46	3143.82	2997.05	2451.12	2649.54	2561.62	2	55287842	55419896	-	17646.6	3843.46	2906.17	2941.1	protein_coding	ENSG00000115355	ensembl_havana	17	1	0.0119951	0.172542	0.767321	-0.382098	-1.30324	2554.23	3328.76	-1.60235	-1.05996	0.0119936	0.17252
CCDC88C	CCDC88C	678.315	558.919	673.371	534.929	551.031	400.948	14	91271323	91417845	-	3397.51	678.315	557.955	566.252	protein_coding	ENSG00000015133	ensembl_havana	19	1	0.07239	0.417397	0.7782	-0.361787	-1.28502	495.352	636.535	-1.68934	1.02306	0.072387	0.417379
CCDC90B	CCDC90B	932.445	985.06	954.172	1149.7	1321.56	1318.35	11	83259097	83286408	-	6661.28	1321.56	1098.34	1110.21	protein_coding	ENSG00000137500	ensembl_havana	9	1	0.00387627	0.0890344	1.31999	0.400532	1.31999	1263.63	957.3	1.09332	1.59366	0.00387544	0.0890153
CCDC91	CCDC91	351.021	379.426	303.677	424.255	387.558	532.028	12	28133249	28581512	+	2377.96	532.028	390.357	396.327	protein_coding	ENSG00000123106	ensembl_havana	10	1	0.0722921	0.417115	1.29819	0.376501	1.29819	448.165	345.223	-1.0239	1.72558	0.072289	0.417097
CCDC93	CCDC93	1148.35	1156.94	1180.37	757.364	914.708	1118.89	2	117915478	118014134	-	6276.62	1180.37	1033.07	1046.1	protein_coding	ENSG00000125633	ensembl_havana	11	1	0.0869083	0.451487	0.801248	-0.319678	-1.24805	930.895	1161.81	-1.60845	1.03262	0.0869052	0.451471
CCDC9B	CCDC9B	2261.35	2705.76	2833.46	2163.6	1836.77	1765.71	15	40331452	40340968	-	13566.7	2833.46	2225.98	2261.11	protein_coding	ENSG00000188549	ensembl_havana	12	1	0.007655	0.134421	0.739163	-0.436035	-1.35288	1921.58	2599.67	-1.68937	-1.08342	0.00765376	0.134399
CCNDBP1	CCNDBP1	734.681	781.955	690.536	1035.14	891.753	855.014	15	43185118	43197178	+	4989.08	1035.14	824.038	831.513	protein_coding	ENSG00000166946	ensembl_havana	14	1	0.0345693	0.297825	1.25894	0.332206	1.25894	926.845	736.213	1.01686	1.55865	0.0345668	0.297804
CCNE2	CCNE2	172.615	239.4	195.464	336.589	222.834	413.305	8	94879770	94896679	-	1580.21	413.305	251.056	263.368	protein_coding	ENSG00000175305	ensembl_havana	17	1	0.0197679	0.226409	1.60049	0.678517	1.60049	324.302	202.626	1.07769	2.37693	0.0197659	0.226386
CCNF	CCNF	513.034	490.496	594.149	435.103	439.908	400.093	16	2429394	2458855	+	2872.78	594.149	474.75	478.797	protein_coding	ENSG00000162063	ensembl_havana	13	1	0.0550595	0.369847	0.799022	-0.323693	-1.25153	424.912	531.79	-1.57396	1.00487	0.0550566	0.369828
CCNG1	CCNG1	977.351	973.899	874.064	705.283	773.283	681.956	5	163437569	163446152	+	4985.84	977.351	822.421	830.973	protein_coding	ENSG00000113328	ensembl_havana	19	1	0.00801626	0.137776	0.764206	-0.387966	-1.30855	720.176	942.385	-1.59633	-1.07265	0.00801499	0.137754
CCNJ	CCNJ	355.399	308.339	302.357	239.796	261.74	185.91	10	96043394	96060871	+	1653.54	355.399	269.906	275.59	protein_coding	ENSG00000107443	ensembl_havana	16	1	0.0255523	0.25655	0.710601	-0.492889	-1.40726	228.966	322.215	-1.89937	-1.04265	0.0255501	0.256528
CCNL1	CCNL1	834.041	773.957	796.162	680.326	518.888	621.128	3	157146508	157160761	-	4224.5	834.041	694.992	704.084	protein_coding	ENSG00000163660	ensembl_havana	12	1	0.0176175	0.212687	0.756792	-0.402032	-1.32137	606.483	801.387	-1.66325	-1.04976	0.0176156	0.212664
CCNL2	CCNL2	2147.68	2014.43	2033.31	1937.9	1504.32	1503.56	1	1385711	1399336	-	11141.2	2147.68	1838.03	1856.87	protein_coding	ENSG00000221978	ensembl_havana	12	1	0.0431802	0.331084	0.797971	-0.325592	-1.25318	1647.98	2065.21	-1.55963	-1.00694	0.0431775	0.331063
CCNT1	CCNT1	693.602	709.977	712.98	721.554	738.384	1488.99	12	48688458	48716999	-	5065.49	1488.99	808.127	844.249	protein_coding	ENSG00000129315	ensembl_havana	11	1	0.105145	0.492084	1.39388	0.479102	1.39388	983.382	705.502	-1.07207	2.08291	0.105141	0.492069
CCSAP	CCSAP	293.299	334.997	374.976	288.623	267.25	228.747	1	229321011	229343295	-	1787.89	374.976	294.324	297.982	protein_coding	ENSG00000154429	ensembl_havana	11	1	0.0869508	0.45157	0.78237	-0.354077	-1.27817	261.273	333.95	-1.69291	1.03624	0.0869477	0.451554
CCSER2	CCSER2	1235.3	1222.7	1201.5	967.864	1071.77	962.107	10	84328586	84518522	+	6661.24	1235.3	1104.06	1110.21	protein_coding	ENSG00000107771	ensembl_havana	17	1	0.029436	0.275071	0.820222	-0.285914	-1.21918	1000.66	1219.99	-1.45725	-1.02	0.0294337	0.275049
CCT3	CCT3	2976.98	3158	3175.43	4024.42	3651.59	3491.27	1	156308968	156367874	-	20477.7	4024.42	3395.16	3412.95	protein_coding	ENSG00000163468	ensembl_havana	15	1	0.036934	0.309104	1.19936	0.262263	1.19936	3721.92	3103.26	1.01109	1.42269	0.0369315	0.309083
CCT5	CCT5	4645.7	5425.08	4927.2	5855.09	5659.22	6173.12	5	10249929	10266390	+	32685.4	6173.12	5421.78	5447.57	protein_coding	ENSG00000150753	ensembl_havana	12	1	0.0614479	0.386045	1.17927	0.237896	1.17927	5895.93	4999.64	-1.00794	1.40172	0.061445	0.386027
CD151	CD151	6034.1	6829.57	7205.07	10561.1	9864.37	9803.44	11	832887	839832	+	50297.6	10561.1	8196.59	8382.94	protein_coding	ENSG00000177697	ensembl_havana	19	1	5.53895e-06	0.000914088	1.50639	0.591097	1.50639	10076	6688.85	1.26235	1.79762	5.53249e-06	0.000913022
CD164	CD164	3542.59	3726.78	3459.24	3670.68	4318.39	5377.66	6	109366514	109382468	-	24095.4	5377.66	3966.28	4015.89	protein_coding	ENSG00000135535	ensembl_havana	17	1	0.0740752	0.422527	1.24599	0.317297	1.24599	4456.2	3576.42	-1.02163	1.58609	0.0740722	0.42251
CD24	CD24	1993.87	1759.4	1810.18	553.376	1429.94	1076.9	6	106969831	106975628	-	8623.68	1993.87	1325	1437.28	protein_coding	ENSG00000272398	ensembl_havana	6	1	0.00535049	0.108121	0.550256	-0.861824	-1.81734	1020.46	1854.51	-2.76696	-1.19362	0.00534949	0.1081
CD274	CD274	274.192	399.862	438.351	333.11	265.414	207.328	9	5450503	5470567	+	1918.26	438.351	309.618	319.71	protein_coding	ENSG00000120217	ensembl_havana	14	1	0.0928552	0.465947	0.724271	-0.465399	-1.3807	268.294	370.433	-2.01138	1.05511	0.0928521	0.465931
CD3EAP	CD3EAP	459.248	537.97	493.294	445.717	378.128	313.793	19	45406209	45410767	+	2628.15	537.97	431.395	438.025	protein_coding	ENSG00000117877	ensembl_havana	10	1	0.053001	0.363171	0.762213	-0.391734	-1.31197	378.767	496.931	-1.72733	1.00352	0.0529982	0.363152
CD58	CD58	787.223	846.822	862.176	1175.11	1192.06	1688.59	1	116514534	116571040	-	6551.98	1688.59	1052.52	1092	protein_coding	ENSG00000116815	ensembl_havana	16	1	0.000356654	0.021422	1.62558	0.700951	1.62558	1352.37	831.932	1.24501	2.12247	0.000356487	0.0214119
CD59	CD59	20868.8	23388.3	22920.6	31270.3	31271.8	34326.8	11	33703010	33736480	-	164047	34326.8	26860	27341.1	protein_coding	ENSG00000085063	ensembl_havana	17	1	1.15847e-05	0.00171863	1.442	0.528076	1.442	32289.9	22392.4	1.22439	1.69829	1.15729e-05	0.00171688
CD63	CD63	4194.96	5132.38	5891.37	6989.94	7694.14	8313.05	12	55725323	55729708	-	38215.8	8313.05	6198.35	6369.31	protein_coding	ENSG00000135404	ensembl_havana	11	1	0.000592217	0.0290828	1.51143	0.595919	1.51143	7666.02	5072.01	1.19409	1.91311	0.000591977	0.029071
CD74	CD74	1356.93	1764.2	1543.68	2790.13	3700.73	6493.22	5	150400041	150412930	-	17648.9	6493.22	2506.14	2941.48	protein_coding	ENSG00000019582	ensembl_havana	15	1	7.48679e-07	0.000231383	2.7836	1.47695	2.7836	4328.5	1555	1.85572	4.17544	7.47467e-07	0.000231008
CD81	CD81	3345.71	3222.88	3641.5	4238.2	4069.44	3701.92	11	2376177	2397398	+	22219.7	4238.2	3685.75	3703.28	protein_coding	ENSG00000110651	ensembl_havana	12	1	0.0720072	0.416072	1.1764	0.234379	1.1764	4002.79	3402.58	-1.01464	1.40417	0.0720042	0.416054
CD82	CD82	1402.48	1598.56	1528.95	2342.61	1921.27	2037.3	11	44564427	44620359	+	10831.2	2342.61	1776.48	1805.2	protein_coding	ENSG00000085117	ensembl_havana	12	1	0.00131195	0.0475783	1.3907	0.475816	1.3907	2099.95	1509.99	1.13729	1.70059	0.00131153	0.0475632
CD9	CD9	3617.96	4242.15	4310.88	6224.98	6348.79	3913.56	12	6199715	6238272	+	28658.3	6348.79	4659.47	4776.39	protein_coding	ENSG00000010278	ensembl_havana	14	1	0.0444331	0.333896	1.35461	0.437878	1.35461	5495.39	4056.8	1.00758	1.82116	0.0444304	0.333876
CDA	CDA	541.697	406.973	546.619	333.111	446.335	150.784	1	20589086	20618904	+	2425.52	546.619	373.195	404.253	protein_coding	ENSG00000158825	ensembl_havana	6	1	0.0622419	0.388709	0.622009	-0.684992	-1.60769	309.926	498.266	-2.64823	1.02459	0.062239	0.38869
CDC23	CDC23	779.584	831.716	800.123	645.605	673.177	727.363	5	138187650	138213344	-	4457.57	831.716	739.844	742.928	protein_coding	ENSG00000094880	ensembl_havana	11	1	0.0954551	0.471122	0.848793	-0.236515	-1.17814	682.345	803.901	-1.42855	1.0292	0.0954519	0.471107
CDC25A	CDC25A	242.664	267.464	271.989	194.224	219.494	162.778	3	48157146	48188418	-	1358.61	271.989	222.856	226.436	protein_coding	ENSG00000164045	ensembl_havana	12	1	0.0424474	0.328812	0.73706	-0.440145	-1.35674	192.055	260.569	-1.82171	-1.01045	0.0424448	0.328792
CDC42	CDC42	6551.19	6749.03	6177.91	7721.48	8013.64	8505.15	1	22025511	22101361	+	43718.4	8505.15	7237.73	7286.4	protein_coding	ENSG00000070831	ensembl_havana	17	1	0.00671733	0.123349	1.24441	0.315462	1.24441	8080.45	6493.4	1.06242	1.45757	0.00671618	0.123328
CDC42EP5	CDC42EP5	135.663	68.4211	92.4235	36.8917	90.9202	29.1288	19	54465026	54473297	-	453.448	135.663	66.1542	75.5747	protein_coding	ENSG00000167617	ensembl_havana	3	1	0.0760366	0.426781	0.529633	-0.916934	-1.8881	52.3492	98.8404	-3.81028	1.06883	0.0760336	0.426764
CDH1	CDH1	24.8397	34.6548	5.28134	5.42525	3.67354	10.2807	16	68737292	68835542	+	84.1554	34.6548	9.88243	14.0259	protein_coding	ENSG00000039068	ensembl_havana	19	1	0.0529797	0.363171	0.298062	-1.74632	-3.35501	6.49305	21.7842	-11.4326	1.01568	0.0529769	0.363152
CDH11	CDH11	5076.61	5510.79	5050.17	2064.85	3086.59	3457.49	16	64943753	65126113	-	24246.5	5510.79	3821.23	4041.08	protein_coding	ENSG00000140937	ensembl_havana	14	1	4.68013e-05	0.00479234	0.55063	-0.860846	-1.8161	2870.26	5212.68	-2.42045	-1.36265	4.67654e-05	0.00478866
CDH24	CDH24	227.379	180.383	209.933	161.672	154.289	105.378	14	23047062	23057539	-	1039.03	227.379	168.186	173.172	protein_coding	ENSG00000139880	ensembl_havana	19	1	0.0384807	0.313564	0.681199	-0.553852	-1.468	140.188	205.796	-2.1116	-1.02056	0.0384782	0.313544
CDH5	CDH5	172.923	151.948	248.223	23.8711	109.288	15.4211	16	66366622	66404785	+	721.674	248.223	80.0126	120.279	protein_coding	ENSG00000179776	ensembl_havana	19	1	0.0021632	0.0645096	0.259709	-1.94503	-3.85047	49.5749	190.886	-9.11375	-1.62678	0.00216262	0.0644924
CDK10	CDK10	548.384	560.697	639.042	539.27	301.231	438.645	16	89680737	89696355	+	3027.27	639.042	490.938	504.545	protein_coding	ENSG00000185324	ensembl_havana	22	1	0.067988	0.404501	0.73154	-0.450992	-1.36698	426.064	582.421	-1.91231	1.02337	0.067985	0.404483
CDK13	CDK13	1627.96	1496.38	1527.63	1176.2	1221.45	1253.4	7	39950121	40099581	+	8303.01	1627.96	1373.07	1383.84	protein_coding	ENSG00000065883	ensembl_havana	16	1	0.00529602	0.107473	0.784934	-0.349357	-1.27399	1217.23	1550.75	-1.51038	-1.0746	0.00529502	0.107453
CDK16	CDK16	2595.76	2552.89	3035.44	1619.98	1738.5	1349.35	X	47217860	47229998	+	12891.9	3035.44	2060.1	2148.65	protein_coding	ENSG00000102225	ensembl_havana	16	1	1.21953e-06	0.000317325	0.575319	-0.797566	-1.73817	1569.04	2727.25	-2.17301	-1.39034	1.2177e-06	0.00031685
CDK2	CDK2	1134.99	1108.95	1336.18	962.441	885.324	1009.23	12	55966781	55972790	+	6437.11	1336.18	1063.42	1072.85	protein_coding	ENSG00000123374	ensembl_havana	11	1	0.0350749	0.300051	0.798679	-0.324312	-1.25207	952.368	1192.43	-1.5432	-1.01586	0.0350724	0.30003
CDK2AP1	CDK2AP1	1177.76	998.275	1042.18	1189.06	1340.32	1838.12	12	123250112	123272335	-	7585.73	1838.12	1237.39	1264.29	protein_coding	ENSG00000111328	ensembl_havana	7	1	0.03374	0.294411	1.35751	0.440965	1.35751	1456.34	1072.8	1.02377	1.80005	0.0337376	0.29439
CDK4	CDK4	1563.25	1673.17	1884.03	2082.26	2089.66	2104.93	12	57747727	57756014	-	11397.3	2104.93	1886.91	1899.55	protein_coding	ENSG00000135446	ensembl_havana	17	1	0.029548	0.275209	1.22656	0.294618	1.22656	2092.32	1705.84	1.02049	1.47424	0.0295456	0.275187
CDK5R1	CDK5R1	293.3	254.135	289.154	201.819	236.944	224.463	17	32486993	32491254	+	1499.81	293.3	247.767	249.969	protein_coding	ENSG00000176749	ensembl_havana	9	1	0.0923444	0.464079	0.794073	-0.332657	-1.25933	221.254	278.632	-1.64721	1.03865	0.0923413	0.464063
CDKN1B	CDKN1B	702.199	768.626	683.934	941.823	787.975	1067.48	12	12715058	12722370	+	4952.04	1067.48	814.715	825.34	protein_coding	ENSG00000111276	ensembl_havana	11	1	0.0335868	0.294283	1.29776	0.376021	1.29776	932.536	718.575	1.02045	1.65043	0.0335844	0.294261
CDKN2AIP	CDKN2AIP	469.087	416.747	389.499	480.677	537.255	530.315	4	183444635	183449065	+	2823.58	537.255	467.412	470.596	protein_coding	ENSG00000168564	ensembl_havana	6	1	0.0981305	0.478343	1.21319	0.278809	1.21319	516.298	425.569	-1.0364	1.52541	0.0981273	0.478328
CDKN2AIPNL	CDKN2AIPNL	406.989	566.917	477.962	646.69	642.87	639.976	5	134402065	134411882	-	3381.4	646.69	555.367	563.567	protein_coding	ENSG00000237190	ensembl_havana	4	1	0.0265902	0.26217	1.32838	0.409663	1.32838	643.162	484.172	1.03353	1.70734	0.026588	0.262147
CDKN2C	CDKN2C	555.071	514.49	590.191	1255.4	647.464	779.62	1	50960745	50974635	+	4342.23	1255.4	688.81	723.706	protein_coding	ENSG00000123080	ensembl_havana	12	1	0.00930384	0.148495	1.61585	0.692292	1.61585	893.666	553.063	1.1255	2.31984	0.00930247	0.148473
CDON	CDON	971.614	886.807	937.437	743.259	1021.25	3002.94	11	125955796	126063336	-	7563.3	3002.94	1107.08	1260.55	protein_coding	ENSG00000064309	ensembl_havana	14	1	0.0751371	0.424195	1.70559	0.770269	1.70559	1589.5	931.939	-1.05559	3.07076	0.075134	0.424178
CDRT4	CDRT4	163.752	160.931	219.862	103.401	138.578	97.805	17	15436015	15503609	-	884.328	219.862	141.773	147.388	protein_coding	ENSG00000239704	ensembl_havana	11	1	0.0155795	0.200016	0.625913	-0.675966	-1.59767	113.294	181.007	-2.33552	-1.09292	0.0155777	0.199993
CEBPA	CEBPA	145.407	196.326	497.767	160.664	91.1086	100.572	19	33299934	33302535	-	1191.84	497.767	165.993	198.641	protein_coding	ENSG00000245848	havana	3	1	0.00768792	0.134544	0.420161	-1.25099	-2.38004	117.303	279.186	-4.50288	-1.25799	0.00768669	0.134523
CEBPD	CEBPD	537.875	315.448	517.572	240.881	393.988	143.074	8	47736913	47738165	-	2148.84	537.875	325.64	358.139	protein_coding	ENSG00000221869	ensembl_havana	5	1	0.0313913	0.282687	0.567637	-0.816961	-1.76169	259.263	456.741	-2.95056	-1.05185	0.031389	0.282665
CEMIP	CEMIP	14.3306	147.505	29.0474	18.4459	14.6942	4.28364	15	80779343	80951777	+	228.307	147.505	20.3629	38.0512	protein_coding	ENSG00000103888	ensembl_havana	17	1	0.00811494	0.138353	0.194475	-2.36234	-5.14204	12.408	63.8025	-17.2838	-1.52979	0.00811367	0.138331
CENPI	CENPI	423.23	342.106	306.318	322.259	256.23	135.363	X	101098218	101163682	+	1785.51	423.23	281.324	297.584	protein_coding	ENSG00000102384	ensembl_havana	13	1	0.0773293	0.429296	0.664752	-0.589112	-1.50432	237.597	357.422	-2.36655	1.04576	0.0773263	0.429279
CENPJ	CENPJ	214.959	255.912	182.206	116.1	135.003	149.071	13	24882279	24922890	-	1053.25	255.912	169.146	175.542	protein_coding	ENSG00000151849	ensembl_havana	15	1	0.00464377	0.0987921	0.612198	-0.70793	-1.63346	133.598	218.226	-2.29435	-1.16294	0.00464285	0.0987724
CENPO	CENPO	834.258	750.339	732.677	670.445	675.383	605.62	2	24793136	24822377	+	4268.72	834.258	707.833	711.454	protein_coding	ENSG00000138092	ensembl_havana	11	1	0.0979183	0.47796	0.841513	-0.248942	-1.18834	650.292	772.764	-1.45776	1.0323	0.0979152	0.477944
CENPS	CENPS	182.966	202.285	178.076	306.141	219.057	265.288	1	10430433	10442809	+	1353.81	306.141	221.236	225.635	protein_coding	ENSG00000175279	havana	22	1	0.0310857	0.28136	1.40037	0.485803	1.40037	263.249	187.986	1.03109	1.9019	0.0310833	0.281339
CENPT	CENPT	726.083	724.197	757.873	691.177	533.581	327.27	16	67828157	67847812	-	3760.18	757.873	603.054	626.697	protein_coding	ENSG00000102901	ensembl_havana	13	1	0.0633207	0.392963	0.70228	-0.509882	-1.42393	516.862	735.978	-2.06774	1.0198	0.0633178	0.392945
CENPU	CENPU	728.384	687.476	591.827	762.221	758.217	1249.93	4	184694085	184734131	-	4778.06	1249.93	773.444	796.343	protein_coding	ENSG00000151725	ensembl_havana	12	1	0.058518	0.378065	1.37978	0.464439	1.37978	923.85	669.563	-1.01167	1.92601	0.0585151	0.378046
CEP250	CEP250	1523.82	1262.68	1740.2	1057.92	1098.39	738.501	20	35455164	35519281	+	7421.52	1740.2	1192.34	1236.92	protein_coding	ENSG00000126001	ensembl_havana	16	1	0.00314587	0.0782132	0.639577	-0.644809	-1.56353	964.643	1508.25	-2.10345	-1.1622	0.00314514	0.078195
CEP295	CEP295	534.44	447.929	473.211	323.729	323.537	475.63	11	93661682	93730359	+	2578.48	534.44	421.945	429.746	protein_coding	ENSG00000166004	ensembl_havana	15	1	0.0990115	0.479486	0.772115	-0.373113	-1.29514	374.651	485.227	-1.76102	1.04985	0.0990084	0.479471
CEP41	CEP41	415.587	392.754	336.686	534.93	570.318	502.042	7	130393771	130442434	-	2752.32	570.318	451.018	458.72	protein_coding	ENSG00000106477	ensembl_havana	19	1	0.00514141	0.105491	1.40114	0.486602	1.40114	535.706	382.335	1.10631	1.77455	0.00514043	0.105471
CEP85L	CEP85L	279.924	264.798	293.114	208.33	157.962	224.463	6	118460772	118710076	-	1428.59	293.114	233.117	238.099	protein_coding	ENSG00000111860	ensembl_havana	14	1	0.0245999	0.251288	0.705576	-0.503126	-1.41728	196.911	279.079	-1.921	-1.04565	0.0245978	0.251265
CERS1	CERS1	32.5534	29.1277	24.0598	2.99307	18.1441	7.79641	19	18868545	18896728	-	114.674	32.5534	14.5934	19.1124	protein_coding	ENSG00000223802	ensembl_havana	7	1	0.0339628	0.294993	0.33957	-1.55822	-2.9449	9.72331	28.6342	-7.99145	-1.08521	0.0339604	0.294971
CERS5	CERS5	385.015	449.624	409.304	537.101	476.642	601.423	12	50129289	50167534	-	2859.11	601.423	470.941	476.518	protein_coding	ENSG00000139624	ensembl_havana	14	1	0.0362472	0.306338	1.29823	0.376551	1.29823	538.5	414.794	1.01686	1.65746	0.0362447	0.306317
CETN3	CETN3	321.005	422.078	286.513	573.991	528.99	460.062	5	90392261	90409787	-	2592.64	573.991	419.15	432.107	protein_coding	ENSG00000153140	ensembl_havana	8	1	0.00627643	0.11884	1.51429	0.59864	1.51429	520.777	343.909	1.12453	2.03913	0.00627533	0.118819
CFAP300	CFAP300	6.68761	6.2201	10.5627	41.2319	11.0206	25.7018	11	102047437	102084555	+	101.425	41.2319	13.1333	16.9041	protein_coding	ENSG00000137691	ensembl_havana	13	1	0.02097	0.232668	3.35269	1.74532	3.35269	25.8949	7.72363	1.20041	9.36388	0.020968	0.232646
CFAP45	CFAP45	58.2778	41.7635	99.0252	33.6365	29.3884	7.71055	1	159872364	159900166	-	269.802	99.0252	34.9961	44.967	protein_coding	ENSG00000213085	ensembl_havana	10	1	0.0158664	0.202627	0.354747	-1.49514	-2.81891	23.4483	66.0985	-6.54355	-1.21436	0.0158646	0.202605
CFAP58	CFAP58	42.0364	31.1005	30.3677	19.5309	24.7964	14.5644	10	104353833	104455103	+	162.396	42.0364	25.5781	27.0661	protein_coding	ENSG00000120051	ensembl_havana	15	1	0.104665	0.491055	0.567072	-0.818395	-1.76344	19.6034	34.5696	-3.49895	1.12516	0.104662	0.491041
CFAP97	CFAP97	914.295	903.69	695.816	932.057	1159	1656.91	4	185159665	185209505	-	6261.78	1656.91	1004.78	1043.63	protein_coding	ENSG00000164323	ensembl_havana	14	1	0.0208848	0.232483	1.49064	0.575928	1.49064	1249.79	838.428	1.06237	2.09155	0.0208828	0.232461
CFD	CFD	57.3224	49.7608	36.9694	133.461	119.39	180.77	19	859664	863642	+	577.674	180.77	81.988	96.2789	protein_coding	ENSG00000197766	ensembl_havana	8	1	2.4702e-06	0.0005315	2.99347	1.58182	2.99347	144.668	48.3279	1.89696	4.7238	2.46689e-06	0.000530788
CFH	CFH	196.807	105.742	102.986	241.966	170.82	1184	1	196652043	196747505	+	2002.32	1184	217.162	333.719	protein_coding	ENSG00000000971	ensembl_havana	16	1	0.0253107	0.255331	3.93697	1.97709	3.93697	532.359	135.221	1.18473	13.0829	0.0253086	0.255308
CFL1	CFL1	13760	15525.2	16025	21954.6	20034	15970.9	11	65823022	65862027	-	103270	21954.6	16989.5	17211.6	protein_coding	ENSG00000172757	ensembl_havana	13	1	0.0338676	0.294935	1.27916	0.355198	1.27916	19319.3	15103.1	1.01894	1.60584	0.0338652	0.294914
CFP	CFP	330.559	486.944	364.413	298.389	301.23	178.199	X	47623172	47630306	-	1959.73	486.944	312.957	326.622	protein_coding	ENSG00000126759	ensembl_havana	13	1	0.0326433	0.289023	0.657039	-0.605948	-1.52198	259.019	394.222	-2.23743	-1.0353	0.0326408	0.289002
CH25H	CH25H	38.2149	21.326	56.7744	15.1907	21.1229	23.9884	10	89205629	89207318	-	176.617	56.7744	26.6239	29.4362	protein_coding	ENSG00000138135	ensembl_havana	7	1	0.097345	0.476301	0.524436	-0.931161	-1.90681	20.1736	38.4673	-4.08973	1.12481	0.0973418	0.476286
CHCHD10	CHCHD10	197.762	229.255	262.747	465.486	487.664	206.471	22	23765834	23767973	-	1849.39	487.664	286.955	308.231	protein_coding	ENSG00000250479	ensembl_havana	9	1	0.0286829	0.271426	1.68157	0.749812	1.68157	386.29	229.719	1.05562	2.6787	0.0286806	0.271404
CHCHD3	CHCHD3	676.41	856.492	680.947	1226.02	1114.82	789.903	7	132784870	133082091	-	5344.59	1226.02	867.402	890.765	protein_coding	ENSG00000106554	ensembl_havana	13	1	0.0243192	0.250077	1.4129	0.498656	1.4129	1043.16	738.313	1.04585	1.90876	0.024317	0.250055
CHCHD6	CHCHD6	53.5009	72.864	75.2592	101.995	129.492	79.6757	3	126704240	126960421	+	512.787	129.492	82.211	85.4645	protein_coding	ENSG00000159685	ensembl_havana	11	1	0.065189	0.397177	1.54579	0.628344	1.54579	103.672	67.0674	-1.02778	2.45584	0.0651861	0.397159
CHD1L	CHD1L	428.007	404.303	384.922	366.684	336.029	201.726	1	147242654	147295766	+	2121.67	428.007	343.949	353.612	protein_coding	ENSG00000131778	ensembl_havana	19	1	0.101547	0.483826	0.74188	-0.430743	-1.34793	301.105	405.867	-1.92698	1.06058	0.101543	0.483811
CHD2	CHD2	2397.03	1816.06	2208.75	1328.51	1725.07	2017.37	15	92900189	93027997	+	11492.8	2397.03	1882.14	1915.46	protein_coding	ENSG00000173575	ensembl_havana	22	1	0.101187	0.483685	0.789968	-0.340135	-1.26587	1690.83	2140.38	-1.67812	1.04723	0.101184	0.48367
CHKB	CHKB	261.141	223.199	287.529	184.95	216.032	195.893	22	50578959	50601456	-	1368.74	287.529	225.41	228.124	protein_coding	ENSG00000100288	ensembl_havana	20	1	0.0840794	0.444222	0.775301	-0.367172	-1.28982	199.066	256.759	-1.72161	1.03484	0.0840764	0.444206
CHML	CHML	1963.41	1749.6	1910.05	840.616	1404.12	1336.3	1	241628853	241640255	-	9204.1	1963.41	1476.22	1534.02	protein_coding	ENSG00000203668	havana	2	1	0.00338919	0.0812098	0.637165	-0.650261	-1.56945	1194.21	1874.25	-2.12171	-1.16094	0.00338843	0.0811915
CHMP2A	CHMP2A	1027.98	1148.05	1074.75	1554.87	1530.95	1524.13	19	58551566	58555106	-	7860.73	1554.87	1289.7	1310.12	protein_coding	ENSG00000130724	ensembl_havana	9	1	7.19718e-05	0.00654212	1.41777	0.503628	1.41777	1536.58	1083.79	1.19332	1.68445	7.19216e-05	0.00653755
CHMP3	CHMP3	2937.74	3220.28	2972.08	3918.07	3543.99	4993.04	2	86503430	86563480	-	21585.2	4993.04	3534.41	3597.54	protein_coding	ENSG00000115561	ensembl_havana	16	1	0.00957312	0.150971	1.36421	0.448061	1.36421	4152.04	3043.56	1.07856	1.72549	0.00957173	0.150949
CHMP4C	CHMP4C	36.3042	62.201	56.7744	53.1675	73.4709	275.01	8	81732448	81759516	+	556.928	275.01	71.8625	92.8213	protein_coding	ENSG00000164695	ensembl_havana	5	1	0.0242296	0.249875	2.59197	1.37405	2.59197	134.093	51.7341	1.13207	5.93453	0.0242274	0.249852
CHMP5	CHMP5	1199.95	1653.67	1449.74	1715.45	1780.74	1783.7	9	33264879	33282071	+	9583.25	1783.7	1581.98	1597.21	protein_coding	ENSG00000086065	ensembl_havana	14	1	0.0770663	0.428834	1.22689	0.295005	1.22689	1760.05	1434.56	-1.02245	1.53906	0.0770632	0.428817
CHMP6	CHMP6	355.399	377.649	398.741	435.105	439.907	791.617	17	80991598	81009518	+	2798.42	791.617	448.223	466.403	protein_coding	ENSG00000176108	ensembl_havana	9	1	0.0429113	0.330849	1.47405	0.559786	1.47405	555.923	377.14	1.01246	2.14609	0.0429086	0.330829
CHRDL1	CHRDL1	1007.92	924.132	1377.11	492.615	1136.97	454.922	X	110673856	110795820	-	5393.66	1377.11	829.952	898.943	protein_coding	ENSG00000101938	ensembl_havana	15	1	0.0614815	0.386045	0.630221	-0.66607	-1.58674	694.933	1102.68	-2.5743	1.02246	0.0614786	0.386027
CHST7	CHST7	295.21	333.219	406.663	221.35	222.249	85.6728	X	46573765	46598497	+	1564.37	406.663	235.041	260.728	protein_coding	ENSG00000147119	ensembl_havana	4	1	0.00889692	0.146008	0.510951	-0.968744	-1.95714	176.177	344.801	-3.23675	-1.1834	0.00889558	0.145986
CHTF18	CHTF18	693.601	624.674	656.206	639.093	390.314	206.471	16	788046	800738	+	3210.36	693.601	494.622	535.06	protein_coding	ENSG00000127586	ensembl_havana	17	1	0.0594132	0.380765	0.625269	-0.677451	-1.59931	411.522	658.152	-2.60593	1.01882	0.0594103	0.380746
CHURC1	CHURC1	505.392	590.022	543.978	898.299	737.466	576.577	14	64914361	64944592	+	3851.73	898.299	629.047	641.956	protein_coding	ENSG00000258289	ensembl_havana	8	1	0.0430934	0.331084	1.34838	0.431227	1.34838	736.936	546.535	1.00933	1.80132	0.0430908	0.331063
CIAO2A	CIAO2A	303.808	337.663	308.959	399.298	396.743	370.963	15	64072565	64093858	-	2117.43	399.298	350.768	352.906	protein_coding	ENSG00000166797	ensembl_havana	11	1	0.0794551	0.433139	1.22666	0.29473	1.22666	388.88	317.025	-1.0243	1.54124	0.0794521	0.433122
CIITA	CIITA	112.767	80.249	113.969	131.791	138.438	188.255	16	10866222	10943022	+	765.469	188.255	123.466	127.578	protein_coding	ENSG00000179583	ensembl_havana	19	1	0.0487688	0.350097	1.49963	0.584608	1.49963	153.03	102.045	1.00219	2.24398	0.0487661	0.350078
CILK1	CILK1	2238.47	2135.33	1980.49	2750.67	2064.49	3026.78	6	53001279	53061803	-	14196.2	3026.78	2336.52	2366.04	protein_coding	ENSG00000112144	ensembl_havana	15	1	0.100402	0.482371	1.23393	0.303265	1.23393	2613.99	2118.42	-1.0414	1.58563	0.100399	0.482356
CIR1	CIR1	349.667	327.888	331.395	372.172	389.396	504.613	2	174348022	174395713	-	2275.13	504.613	374.947	379.188	protein_coding	ENSG00000138433	ensembl_havana	16	1	0.0992106	0.479796	1.25591	0.328735	1.25591	422.435	336.357	-1.04396	1.64665	0.0992075	0.479781
CISD3	CISD3	680.23	793.389	776.791	1232.93	1026.95	750.199	17	38730341	38735606	+	5260.49	1232.93	857.733	876.748	protein_coding	ENSG00000277972	ensembl_havana	2	1	0.0572133	0.375437	1.33703	0.419037	1.33703	1002.85	750.052	-1.00894	1.80365	0.0572104	0.375418
CITED4	CITED4	201.584	208.818	302.357	94.3994	188.269	76.2488	1	40861054	40862364	-	1071.68	302.357	160.739	178.613	protein_coding	ENSG00000179862	ensembl_havana	7	1	0.0105616	0.159863	0.504437	-0.987254	-1.98241	119.677	237.248	-3.34968	-1.17323	0.0105602	0.159841
CKMT1A	CKMT1A	0.000229234	0	0	2.17008	5.12579e-06	12.8485	15	43692886	43699223	+	15.0188	12.8485	0	2.50313	protein_coding	ENSG00000223572	ensembl_havana	10	1	0.0868698	0.451426	26.2686	4.71527	26.2686	5.02007	0.191106	-1.60493	1107.46	0.0868667	0.45141
CKS1BP3	CKS1BP3	20.3008	11.3118	22.537	14.3063	49.7163	65.3948	5	62512246	62512483	-	183.567	65.3948	24.9412	30.5945	processed_pseudogene	ENSG00000268942	ensembl_havana	2	1	0.0583898	0.377916	2.41349	1.27112	2.41349	43.2936	17.9382	-1.03178	6.01002	0.0583869	0.377897
CLCN5	CLCN5	122.288	115.516	110.908	50.9974	74.3892	43.6931	X	49922596	50099236	+	517.792	122.288	79.8749	86.2987	protein_coding	ENSG00000171365	ensembl_havana	17	1	0.00144654	0.0506438	0.484612	-1.0451	-2.06351	56.3651	116.31	-3.22248	-1.32136	0.00144609	0.0506283
CLCN6	CLCN6	530.233	526.93	503.049	419.914	428.885	431.792	1	11806096	11848080	+	2840.8	530.233	471.087	473.467	protein_coding	ENSG00000011021	ensembl_havana	23	1	0.0545903	0.368957	0.820497	-0.28543	-1.21877	426.934	520.336	-1.49121	1.0039	0.0545875	0.368937
CLDN1	CLDN1	56.367	44.4293	55.4541	26.0412	20.2045	17.1346	3	190305707	190322447	-	219.631	56.367	32.8298	36.6051	protein_coding	ENSG00000163347	ensembl_havana	6	1	0.00274475	0.0734728	0.404188	-1.3069	-2.4741	21.0155	51.9945	-4.47582	-1.3676	0.00274408	0.0734549
CLDN2	CLDN2	21.0182	12.4402	18.4847	56.4226	20.2045	34.2691	X	106900164	106930862	+	162.839	56.4226	23.9519	27.1399	protein_coding	ENSG00000165376	ensembl_havana	11	1	0.0665357	0.400487	2.13414	1.09365	2.13414	36.8374	17.261	-1.05308	4.79628	0.0665328	0.400469
CLDN4	CLDN4	1845.75	2571.59	2471.73	1830.5	1930.45	1070.91	7	73799542	73832694	+	11720.9	2571.59	1881.74	1953.49	protein_coding	ENSG00000189143	ensembl_havana	9	1	0.047091	0.343642	0.701291	-0.511914	-1.42594	1610.32	2296.22	-2.02406	-1.00457	0.0470883	0.343622
CLDN9	CLDN9	35.3488	20.4375	17.1644	7.59535	8.26547	10.2807	16	3012923	3014506	+	99.0922	35.3488	14.1431	16.5154	protein_coding	ENSG00000213937	ensembl_havana	4	1	0.0247308	0.252023	0.357989	-1.48201	-2.79338	8.74476	24.4274	-6.84723	-1.13958	0.0247287	0.252001
CLDND1	CLDND1	2525.04	2780.34	2772.72	3020.74	3365.84	3972.59	3	98497912	98523067	-	18437.3	3972.59	3038.03	3072.88	protein_coding	ENSG00000080822	ensembl_havana	17	1	0.0218266	0.23616	1.28267	0.359145	1.28267	3453.63	2692.54	1.03685	1.58675	0.0218245	0.236138
CLGN	CLGN	713.667	689.545	582.267	384.107	640.11	505.473	4	140388453	140427662	-	3515.17	713.667	573.585	585.861	protein_coding	ENSG00000153132	ensembl_havana	13	1	0.105579	0.49295	0.770495	-0.376142	-1.29787	510.241	662.225	-1.77975	1.05657	0.105576	0.492935
CLIC3	CLIC3	162.413	187.491	215.215	350.471	190.106	348.688	9	136994608	136996569	-	1454.38	350.471	231.079	242.397	protein_coding	ENSG00000169583	ensembl_havana	13	1	0.0293196	0.274435	1.57522	0.655556	1.57522	296.321	188.114	1.04677	2.37046	0.0293173	0.274413
CLIC4	CLIC4	12420.1	12097.6	10261.4	13477.8	14585.8	17067.8	1	24745382	24844322	+	79910.4	17067.8	13151	13318.4	protein_coding	ENSG00000169504	ensembl_havana	15	1	0.0167194	0.207592	1.29761	0.375855	1.29761	15044.3	11593.8	1.04826	1.60627	0.0167176	0.20757
CLIC4P1	CLIC4P1	75.2548	66.9126	62.3516	77.8448	112.722	119.958	9	22747700	22748235	+	515.043	119.958	83.1494	85.8406	processed_pseudogene	ENSG00000236739	havana	3	1	0.059239	0.38041	1.51903	0.603155	1.51903	103.747	68.2981	-1.01643	2.34539	0.0592361	0.380391
CLIP4	CLIP4	2148.64	2252.54	1777.18	1685.09	1760.55	1411.88	2	29097705	29189644	+	11035.9	2252.54	1817.35	1839.31	protein_coding	ENSG00000115295	ensembl_havana	20	1	0.0398632	0.318903	0.785754	-0.347851	-1.27266	1618.94	2060.36	-1.60168	-1.01123	0.0398606	0.318882
CLK1	CLK1	1413.95	1443.06	1333.54	1793.6	1694.42	1753.72	2	200853009	200864745	-	9432.3	1793.6	1561.61	1572.05	protein_coding	ENSG00000013441	ensembl_havana	16	1	0.00824996	0.13912	1.25024	0.322207	1.25024	1747.12	1397.42	1.05933	1.47556	0.00824868	0.139098
CLMP	CLMP	2698.84	2638.15	3174.09	1814.2	2419.94	1418.74	11	123069872	123195249	-	14164	3174.09	2280.77	2360.66	protein_coding	ENSG00000166250	ensembl_havana	12	1	0.00786031	0.136215	0.664256	-0.590189	-1.50544	1884.21	2836.57	-2.03549	-1.11342	0.00785906	0.136193
CLNS1A	CLNS1A	920.98	1004.99	872.742	1139.3	1058.9	1118.89	11	77514936	77637795	-	6115.8	1139.3	1014.53	1019.3	protein_coding	ENSG00000074201	ensembl_havana	9	1	0.0786086	0.431307	1.18425	0.243969	1.18425	1105.59	933.582	-1.01953	1.42983	0.0786056	0.43129
CLU	CLU	631.501	609.569	517.571	595.692	612.563	2060.44	8	27596917	27614701	-	5027.33	2060.44	728.758	837.889	protein_coding	ENSG00000120885	ensembl_havana	22	1	0.0396287	0.318122	1.85884	0.894404	1.85884	1089.88	586.324	1.02985	3.35513	0.0396261	0.318101
CLUAP1	CLUAP1	171.967	163.5	166.362	227.861	174.493	276.723	16	3500976	3539049	+	1180.91	276.723	192.864	196.818	protein_coding	ENSG00000103351	ensembl_havana	13	1	0.0844443	0.445225	1.35375	0.436957	1.35375	226.453	167.279	-1.04202	1.90964	0.0844412	0.445209
CLYBL	CLYBL	5.73224	7.10868	5.28134	19.5309	12.8574	37.696	13	99606669	99897135	+	88.2066	37.696	11.2591	14.7011	protein_coding	ENSG00000125246	ensembl_havana	15	1	0.0109726	0.163529	3.8531	1.94602	3.8531	23.4225	6.07887	1.36274	10.8945	0.0109712	0.163507
CMBL	CMBL	785.316	904.58	900.468	1429.01	1127.78	897.85	5	10275875	10307903	-	6045	1429.01	987.197	1007.5	protein_coding	ENSG00000164237	ensembl_havana	9	1	0.0492605	0.351919	1.33319	0.414887	1.33319	1150.98	863.327	1.00093	1.77575	0.0492577	0.351899
CMPK2	CMPK2	0	11.5516	9.24235	0	0	0	2	6840570	6866636	-	20.794	11.5516	0	3.46566	protein_coding	ENSG00000134326	ensembl_havana	11	1	0.0303467	0.279131	0.0252024	-5.31029	-39.6787	0.174497	6.92381	-1110.1	-1.41825	0.0303444	0.279109
CMSS1	CMSS1	524.5	560.697	524.174	811.619	665.83	597.997	3	99817837	100181733	+	3684.82	811.619	606.588	614.136	protein_coding	ENSG00000184220	ensembl_havana	12	1	0.0440615	0.332832	1.28824	0.3654	1.28824	691.287	536.614	1.00676	1.64842	0.0440588	0.332811
CMTM6	CMTM6	3321.83	3744.51	3213.7	4219.76	4178.59	4409.59	3	32481312	32502853	-	23088	4409.59	3820.17	3848	protein_coding	ENSG00000091317	ensembl_havana	8	1	0.0125023	0.175922	1.24564	0.316885	1.24564	4269.43	3427.5	1.04842	1.47995	0.0125007	0.1759
CMTM7	CMTM7	1119.7	1308.88	867.461	1621.06	1236.23	1441.02	3	32391698	32483068	+	7594.35	1621.06	1242.04	1265.73	protein_coding	ENSG00000153551	ensembl_havana	14	1	0.0662986	0.399767	1.30275	0.381556	1.30275	1432.54	1099.63	-1.01796	1.72762	0.0662956	0.399749
CNBP	CNBP	5087.32	5675.45	5311.7	6406.02	6232.07	6173.42	3	129167827	129183923	-	34886	6406.02	5793.11	5814.33	protein_coding	ENSG00000169714	ensembl_havana	17	1	0.0471249	0.343642	1.17019	0.22674	1.17019	6270.34	5358.41	1.002	1.36661	0.0471221	0.343622
CNEP1R1	CNEP1R1	257.951	318.114	297.075	335.28	380.211	365.823	16	50024410	50037089	+	1954.45	380.211	323.059	325.742	protein_coding	ENSG00000205423	ensembl_havana	11	1	0.0979514	0.47796	1.23905	0.309236	1.23905	360.606	291.034	-1.04031	1.59713	0.0979483	0.477944
CNIH1	CNIH1	2280.47	2755.51	2235.33	3131.45	3124.35	2842.62	14	54423561	54441392	-	16369.7	3131.45	2703.74	2728.29	protein_coding	ENSG00000100528	ensembl_havana	12	1	0.0289488	0.272301	1.25079	0.322837	1.25079	3032.61	2424.56	1.02324	1.52894	0.0289465	0.272279
CNN2	CNN2	1556.3	1519.48	1554.03	1853.27	2026.89	2505.93	19	1026586	1039069	+	11015.9	2505.93	1805.08	1835.98	protein_coding	ENSG00000064666	ensembl_havana	15	1	0.00461442	0.0986613	1.37976	0.464419	1.37976	2129.26	1543.21	1.10427	1.72398	0.0046135	0.0986416
CNN3	CNN3	4998.67	4976.11	4779.68	7607.28	6658.1	5111.34	1	94896949	94927224	-	34131.2	7607.28	5598.13	5688.53	protein_coding	ENSG00000117519	ensembl_havana	16	1	0.0282902	0.270099	1.31311	0.39299	1.31311	6458.29	4918.31	1.0294	1.67502	0.0282879	0.270077
CNOT11	CNOT11	623.859	598.906	602.073	697.687	717.259	710.228	2	101252886	101270317	+	3950.01	717.259	656.354	658.336	protein_coding	ENSG00000158435	ensembl_havana	8	1	0.106928	0.495585	1.16457	0.219798	1.16457	708.458	608.343	-1.03342	1.40154	0.106925	0.49557
CNPY2	CNPY2	443.681	414.102	483.15	638.463	490.173	561.454	12	56309842	56316120	-	3031.02	638.463	499.854	505.17	protein_coding	ENSG00000257727	ensembl_havana	6	1	0.0669116	0.401328	1.261	0.334569	1.261	563.05	446.51	-1.01629	1.61603	0.0669086	0.40131
CNR1	CNR1	7.64298	0.888585	0	2.1701	9.18386	53.9739	6	88139864	88166360	-	73.8594	53.9739	0	12.3099	protein_coding	ENSG00000118432	ensembl_havana	12	1	0.0416659	0.325327	7.518	2.91035	7.518	21.837	2.90462	1.07912	52.3765	0.0416632	0.325306
CNTN1	CNTN1	187.253	211.483	161.081	17.3608	156.126	101.951	12	40692439	41072416	+	835.255	211.483	109.908	139.209	protein_coding	ENSG00000018236	ensembl_havana	15	1	0.0859614	0.448633	0.492789	-1.02096	-2.02927	91.9954	186.683	-4.55144	1.10528	0.0859583	0.448617
CNTNAP1	CNTNAP1	906.646	853.886	994.217	403.639	558.379	343.549	17	42682531	42699994	+	4060.32	994.217	624.988	676.72	protein_coding	ENSG00000108797	ensembl_havana	12	1	1.39573e-06	0.000343836	0.474092	-1.07676	-2.1093	435.179	917.922	-2.85616	-1.55773	1.39368e-06	0.00034333
CNTROB	CNTROB	1080.53	1020.09	1099.84	933.142	815.528	715.369	17	7932101	7949921	+	5664.5	1099.84	933.083	944.083	protein_coding	ENSG00000170037	ensembl_havana	14	1	0.0202142	0.228762	0.769582	-0.377854	-1.29941	820.814	1066.57	-1.62084	-1.04172	0.0202122	0.22874
COA1	COA1	787.227	872.59	802.764	614.138	681.443	520.034	7	43608456	43729718	-	4278.2	872.59	702.324	713.033	protein_coding	ENSG00000106603	ensembl_havana	19	1	0.0101881	0.156016	0.736894	-0.440471	-1.35705	605.03	821.054	-1.71293	-1.0751	0.0101867	0.155994
COCH	COCH	8.59836	1.77717	2.64067	7.59535	4.59193	47.1828	14	30874514	30895066	+	72.3863	47.1828	6.36352	12.0644	protein_coding	ENSG00000100473	ensembl_havana	18	1	0.0581801	0.377614	4.54638	2.18472	4.54638	19.8624	4.36885	-1.05386	21.7829	0.0581772	0.377596
COG4	COG4	451.892	444.294	466.078	567.482	605.215	497.758	16	70480568	70523561	-	3032.72	605.215	501.966	505.453	protein_coding	ENSG00000103051	ensembl_havana	20	1	0.0724221	0.41744	1.22636	0.294382	1.22636	556.647	453.902	-1.01875	1.53215	0.0724191	0.417423
COL12A1	COL12A1	515.901	327.888	456.836	154.077	317.762	376.96	6	75084326	75206054	-	2149.42	515.901	335.504	358.237	protein_coding	ENSG00000111799	ensembl_havana	21	1	0.0774261	0.429296	0.653662	-0.613382	-1.52984	283.299	433.403	-2.45242	1.04786	0.0774231	0.429279
COL17A1	COL17A1	269.415	227.478	249.543	141.057	177.249	98.5237	10	104031286	104085881	-	1163.26	269.415	183.092	193.877	protein_coding	ENSG00000065618	ensembl_havana	21	1	0.00268877	0.0731278	0.558039	-0.841562	-1.79199	138.824	248.77	-2.62285	-1.22433	0.00268811	0.0731098
COL18A1	COL18A1	3360.92	4052.9	3298.21	7678.83	4758.92	8493.24	21	45405165	45513721	+	31643	8493.24	4906.03	5273.84	protein_coding	ENSG00000182871	ensembl_havana	16	1	4.13689e-05	0.00442257	1.9538	0.96628	1.9538	6976.97	3570.98	1.41847	2.69114	4.13363e-05	0.00441908
COL1A1	COL1A1	1292.62	648.668	1402.2	285.368	282.863	480.624	17	50184101	50201633	-	4392.35	1402.2	597.744	732.058	protein_coding	ENSG00000108821	ensembl_havana	14	1	6.539e-07	0.000209717	0.314039	-1.67099	-3.18432	349.836	1113.99	-5.02566	-2.01762	6.5282e-07	0.000209371
COL1A2	COL1A2	662.073	594.465	2310.57	653.198	601.544	235.6	7	94394895	94431228	+	5057.45	2310.57	662.023	842.909	protein_coding	ENSG00000164692	ensembl_havana	18	1	0.0939499	0.468179	0.417852	-1.25893	-2.39319	496.711	1188.72	-6.64433	1.1601	0.0939467	0.468164
COL21A1	COL21A1	2.86612	1.77717	1.32034	13.0206	7.34709	21.4182	6	56056590	56394095	-	47.7495	21.4182	4.89635	7.95825	protein_coding	ENSG00000124749	ensembl_havana	17	1	0.00807714	0.138263	6.90328	2.78728	6.90328	13.9543	2.0214	1.65277	28.8336	0.00807587	0.138241
COL27A1	COL27A1	792.005	717.088	790.883	531.675	447.255	482.337	9	114155537	114312512	+	3761.24	792.005	609.996	626.874	protein_coding	ENSG00000196739	ensembl_havana	15	1	3.24816e-05	0.00363239	0.635213	-0.654689	-1.57428	486.801	766.359	-1.95001	-1.27094	3.24547e-05	0.00362937
COL3A1	COL3A1	109.868	47.9836	167.683	44.4871	15.6126	86.5295	2	188974373	189012747	+	472.163	167.683	61.3132	78.6939	protein_coding	ENSG00000168542	ensembl_havana	16	1	0.0747849	0.42359	0.452184	-1.14502	-2.21149	48.9455	108.242	-5.29468	1.0826	0.0747818	0.423573
COL4A1	COL4A1	1577.32	1448.41	1737.56	1195.73	1226.05	1373.34	13	110148963	110307158	-	8558.4	1737.56	1413.98	1426.4	protein_coding	ENSG00000187498	ensembl_havana	16	1	0.027599	0.266702	0.797358	-0.3267	-1.25414	1265.34	1586.92	-1.53407	-1.02529	0.0275967	0.26668
COL4A2	COL4A2	3321.87	3730.27	4139.23	3102.17	3040.75	2500.75	13	110305812	110513210	+	19835	4139.23	3264.32	3305.84	protein_coding	ENSG00000134871	ensembl_havana	19	1	0.0212237	0.233804	0.772399	-0.372581	-1.29467	2880.85	3729.75	-1.61276	-1.03931	0.0212216	0.233782
COL4A5	COL4A5	116.556	79.0841	171.644	21.701	114.798	20.5615	X	108439838	108697546	+	524.344	171.644	65.7839	87.3907	protein_coding	ENSG00000188153	ensembl_havana	14	1	0.0652578	0.397188	0.428768	-1.22173	-2.33226	52.415	122.246	-5.73843	1.05496	0.0652548	0.39717
COL5A1	COL5A1	3947.63	3128.64	4436.24	2189.6	2441.98	3773.15	9	134641803	134844844	+	19917.2	4436.24	3215.53	3319.54	protein_coding	ENSG00000130635	ensembl_havana	16	1	0.0656831	0.398458	0.730267	-0.453504	-1.36936	2802.02	3836.98	-1.91378	1.0206	0.0656801	0.39844
COL6A3	COL6A3	6971.42	6274.32	6989.9	4805.74	5494.73	5561.76	2	237324003	237414208	-	36097.9	6989.9	5961.83	6016.31	protein_coding	ENSG00000163359	ensembl_havana	16	1	0.00769368	0.134544	0.784004	-0.351067	-1.2755	5287.9	6744.74	-1.52545	-1.06651	0.00769244	0.134523
COL7A1	COL7A1	2210.72	2234.78	2774.04	815.958	886.241	1320.21	3	48564073	48595268	-	10242	2774.04	1535.06	1706.99	protein_coding	ENSG00000114270	ensembl_havana	17	1	3.1115e-08	1.98235e-05	0.418927	-1.25523	-2.38705	1007.92	2405.97	-3.24829	-1.75416	3.10373e-08	1.97742e-05
COL8A2	COL8A2	57.3224	39.0977	64.6965	14.1057	25.7148	29.9855	1	36095239	36125223	-	230.923	64.6965	34.1172	38.4871	protein_coding	ENSG00000171812	ensembl_havana	13	1	0.0141383	0.188932	0.43765	-1.19215	-2.28493	23.4199	53.5128	-4.42108	-1.18091	0.0141366	0.18891
COLGALT2	COLGALT2	352.534	315.448	371.015	1714.38	744.81	1453.87	1	183929854	184037730	-	4952.05	1714.38	651.678	825.342	protein_coding	ENSG00000198756	ensembl_havana	12	1	2.00607e-10	4.8713e-07	3.76725	1.91351	3.76725	1304.12	346.172	2.50352	5.66888	1.99747e-10	4.85043e-07
COMMD2	COMMD2	604.751	646.89	613.956	706.368	913.794	962.106	3	149738472	149752496	-	4447.87	962.106	728.24	741.311	protein_coding	ENSG00000114744	ensembl_havana	9	1	0.00911571	0.14701	1.38478	0.469657	1.38478	861.291	621.969	1.08422	1.76866	0.00911436	0.146989
COMMD4	COMMD4	368.774	445.181	450.235	627.159	582.257	417.226	15	75336020	75343225	+	2890.83	627.159	473.442	481.805	protein_coding	ENSG00000140365	ensembl_havana	16	1	0.101476	0.483826	1.28639	0.36333	1.28639	541.831	421.202	-1.0508	1.73886	0.101473	0.483811
COMMD5	COMMD5	630.187	768.407	838.131	921.442	826.441	1093.64	8	144841042	144853737	-	5078.25	1093.64	834.619	846.375	protein_coding	ENSG00000170619	ensembl_havana	10	1	0.0730203	0.4189	1.27153	0.346566	1.27153	947.351	745.048	-1.02267	1.65344	0.0730173	0.418882
COMMD6	COMMD6	525.456	653.111	450.235	812.703	809.096	756.494	13	75525219	75549440	-	4007.09	812.703	652.054	667.849	protein_coding	ENSG00000188243	ensembl_havana	12	1	0.00452333	0.0981961	1.45747	0.543464	1.45747	792.674	543.871	1.12373	1.89032	0.00452242	0.0981764
COMMD7	COMMD7	924.581	1177.37	1139.52	1542.73	1442.81	1199.99	20	32702691	32743998	-	7427	1542.73	1220.98	1237.83	protein_coding	ENSG00000149600	ensembl_havana	11	1	0.0397158	0.318138	1.29113	0.368631	1.29113	1394.8	1080.29	1.01209	1.6471	0.0397132	0.318117
COMMD8	COMMD8	367.819	430.075	315.56	406.894	605.216	500.329	4	47450787	47463703	-	2625.89	605.216	428.04	437.649	protein_coding	ENSG00000169019	ensembl_havana	11	1	0.054211	0.367562	1.35703	0.440448	1.35703	504.428	371.716	-1.00554	1.85171	0.0542081	0.367543
COMMD9	COMMD9	482.464	512.714	546.618	675.987	662.155	1090.61	11	36269284	36289450	-	3970.55	1090.61	635.72	661.759	protein_coding	ENSG00000110442	ensembl_havana	12	1	0.00651408	0.121348	1.5766	0.656817	1.5766	809.978	513.75	1.13576	2.18855	0.00651295	0.121327
COMT	COMT	820.665	889.476	884.626	1286.87	1215.94	1219.98	22	19941733	19969976	+	6317.56	1286.87	1035.48	1052.93	protein_coding	ENSG00000093010	ensembl_havana	14	1	4.65527e-05	0.00479234	1.43478	0.520828	1.43478	1240.72	864.749	1.20595	1.70703	4.65169e-05	0.00478866
COPG2	COPG2	729.904	787.291	612.636	1095.9	948.695	896.144	7	130506238	130668749	-	5070.57	1095.9	830.449	845.095	protein_coding	ENSG00000158623	ensembl_havana	14	1	0.00844455	0.140845	1.37858	0.463179	1.37858	979.87	710.784	1.0856	1.75061	0.00844325	0.140823
COPRS	COPRS	595.199	736.632	670.729	1137.13	941.35	980.949	17	31851871	31859292	-	5061.99	1137.13	822.138	843.665	protein_coding	ENSG00000172301	ensembl_havana	11	1	0.000291091	0.0186013	1.52703	0.61073	1.52703	1019.45	667.605	1.21449	1.92	0.000290946	0.0185921
COPS4	COPS4	685.958	686.88	705.059	749.769	942.267	890.144	4	83034447	83075819	+	4660.08	942.267	770.302	776.68	protein_coding	ENSG00000138663	ensembl_havana	9	1	0.0475297	0.345113	1.24355	0.314462	1.24355	861.163	692.505	1.00238	1.54274	0.047527	0.345094
COPS7A	COPS7A	944.865	933.9	843.695	1229.36	1121.35	1251.69	12	6724014	6731876	+	6324.86	1251.69	1042.63	1054.14	protein_coding	ENSG00000111652	ensembl_havana	10	1	0.00393651	0.0899366	1.32225	0.402997	1.32225	1200.77	908.124	1.09357	1.59875	0.00393567	0.0899174
COPS8	COPS8	758.564	741.769	742.028	757.365	921.151	1284.5	2	237085882	237100475	+	5205.38	1284.5	848.872	867.563	protein_coding	ENSG00000198612	ensembl_havana	11	1	0.0726272	0.417772	1.32206	0.402786	1.32206	988.203	747.473	-1.02596	1.79321	0.0726241	0.417755
COPS8P2	COPS8P2	92.6712	72.1774	95.0642	109.59	99.1745	188.205	3	68145004	68145631	+	656.883	188.205	104.479	109.48	processed_pseudogene	ENSG00000214552	havana	4	1	0.0820747	0.438851	1.53265	0.616029	1.53265	132.53	86.4713	-1.05582	2.48015	0.0820717	0.438834
COPS9	COPS9	209.227	343.883	238.981	538.186	554.705	325.557	2	240126563	240136808	-	2210.54	554.705	344.484	368.423	protein_coding	ENSG00000172428	ensembl_havana	11	1	0.00476105	0.100283	1.788	0.838346	1.788	472.591	264.313	1.19437	2.67667	0.00476011	0.100263
CORIN	CORIN	0	0.888585	0	2.1701	6.4287	15.4211	4	47593999	47838107	-	24.9085	15.4211	0	4.15142	protein_coding	ENSG00000145244	ensembl_havana	12	1	0.0148357	0.194282	21.6238	4.43455	21.6238	8.04747	0.372159	1.82404	256.346	0.014834	0.194259
CORO2B	CORO2B	839.773	595.352	705.058	513.228	530.828	289.575	15	68578993	68727807	+	3473.81	839.773	550.424	578.969	protein_coding	ENSG00000103647	ensembl_havana	13	1	0.0132645	0.182715	0.622775	-0.683217	-1.60572	444.258	713.352	-2.33579	-1.10383	0.0132629	0.182692
CORO7-PAM16	CORO7-PAM16	3.69269	12.9019	0.00359312	0.045781	0.00395724	0.162219	16	4340251	4420495	-	16.8101	12.9019	0.130901	2.80169	protein_coding	ENSG00000103426	ensembl_havana	12	1	0.0438216	0.332832	0.0365944	-4.77223	-27.3266	0.204207	5.5803	-681.369	-1.09594	0.0438189	0.332811
COTL1	COTL1	2081.74	2363.68	2509.94	3020.75	2732.15	2612.19	16	84565596	84618079	-	15320.5	3020.75	2536.4	2553.41	protein_coding	ENSG00000103187	ensembl_havana	8	1	0.0651455	0.397177	1.20284	0.266445	1.20284	2787.97	2317.82	-1.01165	1.46369	0.0651425	0.397159
COX14	COX14	123.243	176.829	236.34	309.239	313.169	251.878	12	50112082	50120458	+	1410.7	313.169	223.796	235.116	protein_coding	ENSG00000178449	ensembl_havana	9	1	0.0137265	0.186808	1.63512	0.709396	1.63512	291.323	178.166	1.10588	2.41764	0.0137249	0.186785
COX20	COX20	553.982	638.298	693.862	824.741	784.016	682.226	1	244835616	244845058	+	4177.13	824.741	690.336	696.188	protein_coding	ENSG00000203667	ensembl_havana	10	1	0.104079	0.489656	1.21522	0.281219	1.21522	763.351	628.158	-1.04094	1.53722	0.104075	0.489641
COX20P1	COX20P1	12.4198	13.3288	20.0641	34.7216	17.7491	37.3451	10	68632371	68632728	+	135.629	37.3451	20.6011	22.6048	processed_pseudogene	ENSG00000213025	havana	2	1	0.0952683	0.470474	1.97871	0.984559	1.97871	29.9232	15.1226	-1.12675	4.41157	0.0952651	0.470458
COX4I1	COX4I1	1860.11	2297.89	2178.56	2876.48	2716.58	2402.27	16	85798633	85807069	+	14331.9	2876.48	2364.6	2388.65	protein_coding	ENSG00000131143	ensembl_havana	10	1	0.0303654	0.279152	1.26166	0.335328	1.26166	2664.74	2112.08	1.02229	1.5571	0.0303631	0.27913
COX5B	COX5B	497.749	944.564	789.56	1362.82	1387.67	665.678	2	97646062	97648384	+	5648.05	1387.67	880.92	941.341	protein_coding	ENSG00000135940	ensembl_havana	7	1	0.0651163	0.397177	1.53034	0.613852	1.53034	1138.48	743.94	-1.027	2.40518	0.0651134	0.397159
COX6A1	COX6A1	1933.34	2380.53	2382.42	3227.26	2965.91	3238.79	12	120438090	120440738	+	16128.2	3238.79	2641.77	2688.04	protein_coding	ENSG00000111775	ensembl_havana	3	1	0.000817827	0.0349282	1.40878	0.494442	1.40878	3143.93	2231.68	1.15259	1.7219	0.000817526	0.0349154
COX6A1P2	COX6A1P2	206.691	236.357	241.078	247.063	323.74	580.49	6	37044860	37045190	+	1835.42	580.49	285.962	305.903	processed_pseudogene	ENSG00000226976	havana	3	1	0.0231679	0.245363	1.68512	0.752855	1.68512	384.152	227.966	1.07402	2.64395	0.0231658	0.245341
COX6C	COX6C	864.611	1210.25	1045.71	1681.82	1704.51	1938.78	8	99873200	99893708	-	8445.69	1938.78	1351.04	1407.61	protein_coding	ENSG00000164919	ensembl_havana	11	1	1.65601e-05	0.00216529	1.70644	0.770992	1.70644	1775.25	1040.32	1.33806	2.17625	1.65443e-05	0.00216323
COX7A2	COX7A2	1072.89	1551.48	1139.45	1605.89	1703.62	1853.12	6	75237675	75250324	-	8926.45	1853.12	1458.25	1487.74	protein_coding	ENSG00000112695	ensembl_havana	11	1	0.0173891	0.21219	1.37113	0.455363	1.37113	1721.08	1255.23	1.0571	1.77844	0.0173873	0.212167
COX7C	COX7C	1947.05	2646.23	1703.24	3277.93	3462.35	3007.13	5	86617928	86620963	+	16043.9	3462.35	2586.63	2673.99	protein_coding	ENSG00000127184	ensembl_havana	13	1	0.0015777	0.0539294	1.54729	0.629747	1.54729	3249.07	2099.84	1.1803	2.02839	0.00157723	0.0539134
COX8A	COX8A	1071.93	1383.53	1317.7	2290.54	2128.82	1315.08	11	63974620	63976544	+	9507.59	2290.54	1524.05	1584.6	protein_coding	ENSG00000176340	ensembl_havana	4	1	0.0124335	0.175286	1.51957	0.603664	1.51957	1911.06	1257.63	1.09454	2.10965	0.0124319	0.175264
CPA4	CPA4	159.547	126.179	134.674	103.08	83.5731	34.2691	7	130293134	130324181	+	641.323	159.547	96.3572	106.887	protein_coding	ENSG00000128510	ensembl_havana	12	1	0.0270809	0.264249	0.523624	-0.933398	-1.90977	73.3874	140.153	-3.38947	-1.07604	0.0270787	0.264227
CPEB4	CPEB4	1092.95	1042.3	1082.68	760.619	898.182	993.804	5	173888349	173961981	+	5870.53	1092.95	970.854	978.422	protein_coding	ENSG00000113742	ensembl_havana	14	1	0.0850235	0.447024	0.824905	-0.277701	-1.21226	884.749	1072.55	-1.50915	1.02692	0.0850204	0.447008
CPQ	CPQ	149.994	166.165	208.613	236.541	319.598	276.723	8	96645242	97149655	+	1357.63	319.598	218.483	226.272	protein_coding	ENSG00000104324	ensembl_havana	16	1	0.00540448	0.108845	1.5933	0.672016	1.5933	277.819	174.367	1.14755	2.21219	0.00540347	0.108825
CRACR2B	CRACR2B	221.646	239.029	186.167	320.09	214.902	346.975	11	826144	831992	+	1528.81	346.975	248.487	254.802	protein_coding	ENSG00000177685	ensembl_havana	17	1	0.0878481	0.453488	1.361	0.444663	1.361	293.965	215.992	-1.04677	1.93894	0.087845	0.453472
CRBN	CRBN	760.965	822.423	720.488	906.243	941.183	975.366	3	3144628	3179728	-	5126.67	975.366	849.237	854.445	protein_coding	ENSG00000113851	ensembl_havana	14	1	0.037772	0.311372	1.2245	0.292191	1.2245	941.129	768.583	1.01151	1.48234	0.0377695	0.311351
CREB3L2	CREB3L2	1111.11	1045.88	1124.92	1414.91	1217.77	1308.22	7	137874979	138002087	-	7222.82	1414.91	1197.35	1203.8	protein_coding	ENSG00000182158	ensembl_havana	15	1	0.0547447	0.368973	1.20085	0.264061	1.20085	1313.31	1093.65	-1.00373	1.44743	0.0547419	0.368954
CREBL2	CREBL2	1123.52	1198.7	1159.25	1446.37	1346.35	1937.92	12	12611827	12645109	+	8212.12	1937.92	1343.92	1368.69	protein_coding	ENSG00000111269	ensembl_havana	3	1	0.017324	0.211851	1.35909	0.442638	1.35909	1577.26	1160.53	1.05562	1.7498	0.0173221	0.211828
CREBZF	CREBZF	1324.15	1236.02	1433.88	870.212	731.954	750.494	11	85659708	85682909	-	6346.71	1433.88	1019.35	1057.79	protein_coding	ENSG00000137504	ensembl_havana	13	1	6.32954e-07	0.000206903	0.589026	-0.763597	-1.69772	783.815	1330.7	-2.0908	-1.37854	6.31903e-07	0.000206559
CREG1	CREG1	642.011	751.742	639.042	965.697	808.178	744.496	1	167529117	167553806	-	4551.17	965.697	750.859	758.528	protein_coding	ENSG00000143162	ensembl_havana	9	1	0.0838534	0.443617	1.23743	0.307352	1.23743	838.985	678.004	-1.0289	1.5755	0.0838503	0.4436
CRIM1	CRIM1	6065.67	5230.22	5269.46	4681.99	5232.03	3360.09	2	36355778	36551136	+	29839.4	6065.67	4895.19	4973.24	protein_coding	ENSG00000150938	ensembl_havana	10	1	0.106794	0.495574	0.801244	-0.319687	-1.24806	4424.41	5521.93	-1.63376	1.04886	0.106791	0.495559
CRIP2	CRIP2	1215.24	1374.64	1484.06	2618.23	1597.99	1626.93	14	105472962	105480163	+	9917.08	2618.23	1601.55	1652.85	protein_coding	ENSG00000182809	ensembl_havana	11	1	0.0254888	0.256214	1.43415	0.520194	1.43415	1947.14	1357.7	1.04521	1.96782	0.0254866	0.256192
CRIPT	CRIPT	412.459	425.632	385.539	483.932	535.418	526.888	2	46616416	46630177	+	2769.87	535.418	458.085	461.645	protein_coding	ENSG00000119878	ensembl_havana	6	1	0.0328667	0.289598	1.26291	0.336752	1.26291	515.63	408.287	1.01919	1.56491	0.0328643	0.289577
CRISPLD1	CRISPLD1	33.4381	25.769	23.766	48.8273	33.9803	125.939	8	74984505	75034559	+	291.72	125.939	40.2925	48.6199	protein_coding	ENSG00000121005	ensembl_havana	9	1	0.0214719	0.233961	2.51565	1.33093	2.51565	69.7269	27.7172	1.14597	5.52241	0.0214698	0.233939
CRNDE	CRNDE	165.28	159.945	108.268	49.9123	69.7973	93.3834	16	54845189	54929190	-	646.585	165.28	98.8176	107.764	lncRNA	ENSG00000245694	havana	10	1	0.00348037	0.0823939	0.492003	-1.02326	-2.03251	71.2802	144.877	-3.27085	-1.263	0.0034796	0.0823755
CRTAM	CRTAM	38.2149	55.0923	38.2897	48.8273	62.4502	252.734	11	122838500	122872644	+	495.609	252.734	62.9329	82.6015	protein_coding	ENSG00000109943	ensembl_havana	9	1	0.0183021	0.216192	2.76615	1.46788	2.76615	121.542	43.9389	1.188	6.44072	0.0183002	0.216169
CRTAP	CRTAP	4803.61	5236.55	4803.42	6613.52	5872.15	5414.5	3	33114014	33147774	+	32743.8	6613.52	5421.99	5457.29	protein_coding	ENSG00000170275	ensembl_havana	15	1	0.0494146	0.352327	1.20572	0.26989	1.20572	5966.14	4948.22	1.00048	1.45305	0.0494118	0.352308
CRYAB	CRYAB	0.955373	1.77717	7.92202	85.719	11.939	1.71346	11	111908564	111923723	-	110.026	85.719	5.3552	18.3377	protein_coding	ENSG00000109846	ensembl_havana	9	1	0.0120338	0.172542	9.62071	3.26614	9.62071	33.024	3.4326	1.64367	56.3118	0.0120322	0.17252
CRYGS	CRYGS	24.8397	23.1032	30.3677	5.42525	12.8574	18.848	3	186538441	186546703	-	115.441	30.3677	16.853	19.2402	protein_coding	ENSG00000213139	ensembl_havana	8	1	0.103601	0.488759	0.48046	-1.05751	-2.08134	12.5046	26.0262	-5.03135	1.16145	0.103598	0.488744
CRYZ	CRYZ	583.733	629.417	551.303	771.946	792.717	867.014	1	74705482	74733409	-	4196.13	867.014	689.518	699.355	protein_coding	ENSG00000116791	ensembl_havana	14	1	0.00213086	0.0645096	1.3773	0.461842	1.3773	810.814	588.698	1.12282	1.68946	0.00213028	0.0644924
CSGALNACT2	CSGALNACT2	2728.55	2928.78	2759.5	2060.51	2611.89	2024.45	10	43138445	43185303	+	15113.7	2928.78	2493.34	2518.95	protein_coding	ENSG00000169826	ensembl_havana	8	1	0.0363164	0.306507	0.79565	-0.329795	-1.25683	2232.41	2805.77	-1.55679	-1.01467	0.0363139	0.306486
CSKMT	CSKMT	31.5273	55.9809	56.7744	134.546	110.206	41.9783	11	62665309	62668497	+	431.014	134.546	62.9744	71.8356	protein_coding	ENSG00000214756	ensembl_havana	8	1	0.051052	0.358788	1.98718	0.99072	1.98718	95.3868	48.0012	-1.00315	3.96129	0.0510492	0.358769
CSPG4	CSPG4	1155.05	791.729	1144.73	782.321	742.056	365.61	15	75674322	75712849	-	4981.49	1155.05	778.251	830.249	protein_coding	ENSG00000173546	ensembl_havana	7	1	0.0213538	0.233911	0.611199	-0.710286	-1.63613	629.675	1030.23	-2.48823	-1.07583	0.0213518	0.233889
CSPG4P10	CSPG4P10	101.022	61.6235	82.25	32.8916	47.4141	8.84437	15	82459472	82477259	+	334.046	101.022	43.8019	55.6743	transcribed_unprocessed_pseudogene	ENSG00000276710	havana	4	1	0.0124495	0.175324	0.363168	-1.46129	-2.75355	29.6362	81.6046	-6.09366	-1.24425	0.0124479	0.175301
CSPG4P12	CSPG4P12	56.0141	49.9745	26.7413	7.49977	19.8122	23.1317	15	85191438	85213906	+	183.174	56.0141	25.2195	30.5289	transcribed_unprocessed_pseudogene	ENSG00000259295	havana	6	1	0.0200906	0.228275	0.381374	-1.39072	-2.6221	16.9523	44.4505	-5.91043	-1.16326	0.0200886	0.228253
CSRNP1	CSRNP1	454.758	512.714	633.763	380.852	438.988	353.829	3	39141855	39154563	-	2774.9	633.763	453.869	462.484	protein_coding	ENSG00000144655	ensembl_havana	15	1	0.0299231	0.277327	0.734014	-0.44612	-1.36237	391.206	532.967	-1.80107	-1.03053	0.0299208	0.277305
CSRNP3	CSRNP3	21.0182	15.106	25.0864	52.0824	28.47	110.518	2	165469647	165689408	+	252.281	110.518	33.0584	42.0468	protein_coding	ENSG00000178662	ensembl_havana	16	1	0.00606014	0.116148	3.14498	1.65305	3.14498	63.794	20.2844	1.38756	7.12826	0.00605906	0.116127
CST1	CST1	87352.5	146908	108211	59606.3	122591	32946	20	23747553	23751269	-	557616	146908	83308.9	92936	protein_coding	ENSG00000170373	ensembl_havana	8	1	0.0937316	0.467915	0.628208	-0.670686	-1.59183	71714.5	114157	-2.74155	1.08194	0.0937285	0.467899
CST3	CST3	19564.6	20320.6	17313.2	36766.5	30860.2	27323.2	20	23626706	23638474	-	152148	36766.5	24445.3	25358.1	protein_coding	ENSG00000101439	ensembl_havana	9	1	7.00825e-06	0.00111333	1.65992	0.731111	1.65992	31649.3	19066.8	1.33074	2.07053	7.00042e-06	0.00111209
CST6	CST6	106.046	150.171	174.284	157.332	168.983	472.057	11	66012008	66013506	+	1228.87	472.057	180.717	204.812	protein_coding	ENSG00000175315	ensembl_havana	3	1	0.0469712	0.34359	1.85856	0.894186	1.85856	266.392	143.332	1.00833	3.4257	0.0469685	0.34357
CTAGE7P	CTAGE7P	17.1967	10.663	10.5627	7.59535	2.76954	3.42691	10	130106046	130108482	+	52.2142	17.1967	7.20266	8.70237	processed_pseudogene	ENSG00000233122	havana	2	1	0.08997	0.459252	0.352941	-1.5025	-2.83333	4.53212	12.841	-9.44341	1.17634	0.0899669	0.459236
CTAGE8	CTAGE8	3.66753e-15	9.20183e-43	6.09757e-13	1.95295	15.9334	3.66749	7	144266701	144269289	-	21.5538	15.9334	7.85468e-12	3.5923	protein_coding	ENSG00000244693	havana	1	1	0.0105107	0.159662	37.6763	5.23559	37.6763	7.19895	0.191074	2.33744	607.29	0.0105093	0.15964
CTH	CTH	104.136	111.962	93.7438	77.0386	78.0628	52.2604	1	70411218	70439852	+	517.203	111.962	83.6866	86.2005	protein_coding	ENSG00000116761	ensembl_havana	12	1	0.0618878	0.388037	0.666526	-0.585267	-1.50032	68.9635	103.467	-2.29683	1.02038	0.0618848	0.388019
CTPS2	CTPS2	420.364	385.646	353.85	251.732	251.637	255.305	X	16587999	16712937	-	1918.53	420.364	312.297	319.756	protein_coding	ENSG00000047230	ensembl_havana	15	1	0.000529149	0.0269561	0.653391	-0.613982	-1.53048	252.911	387.074	-1.94695	-1.20309	0.000528927	0.0269448
CTSA	CTSA	3107.62	3608.24	3893.67	4463.04	4546	3722.94	20	45890144	45898821	+	23341.5	4546	3858.08	3890.25	protein_coding	ENSG00000064601	ensembl_havana	19	1	0.0989426	0.479486	1.20019	0.263259	1.20019	4243.7	3535.87	-1.03487	1.49068	0.0989395	0.479471
CTSD	CTSD	20304.9	22456.4	22549.8	38711.9	31949.2	98348.5	11	1752755	1764574	-	234321	98348.5	32824.1	39053.4	protein_coding	ENSG00000117984	ensembl_havana	14	1	0.000182583	0.0132066	2.58779	1.37172	2.58779	56336.9	21770.3	1.57272	4.258	0.000182481	0.0131992
CTSO	CTSO	227.379	193.712	182.206	193.139	256.23	544.022	4	155924118	155953867	-	1596.69	544.022	244.961	266.115	protein_coding	ENSG00000256043	ensembl_havana	3	1	0.0607321	0.384716	1.64752	0.720297	1.64752	331.476	201.197	-1.02276	2.7761	0.0607292	0.384698
CUL1	CUL1	1239.23	1141.83	1147.37	1365	1399.61	1431.59	7	148697914	148801111	+	7724.62	1431.59	1282.04	1287.44	protein_coding	ENSG00000055130	ensembl_havana	17	1	0.04669	0.342527	1.18919	0.24998	1.18919	1398.89	1176.34	1.00254	1.41059	0.0466873	0.342508
CUL4B	CUL4B	3484.24	3163.38	3146.35	2644.26	3015.03	2363.71	X	120523858	120575795	-	17817	3484.24	2945.84	2969.5	protein_coding	ENSG00000158290	ensembl_havana	18	1	0.0551355	0.369847	0.819087	-0.287911	-1.22087	2674.23	3264.89	-1.49708	1.0044	0.0551327	0.369828
CXADR	CXADR	389.792	350.991	419.867	539.27	531.745	849.018	21	17513043	17593580	+	3080.68	849.018	490.845	513.447	protein_coding	ENSG00000154639	ensembl_havana	19	1	0.0027022	0.0732568	1.65646	0.728102	1.65646	640.38	386.596	1.19117	2.30349	0.00270153	0.0732387
CXXC4	CXXC4	98.4035	62.201	79.2201	84.6339	107.451	357.255	4	104468308	104494902	-	789.164	357.255	107.869	131.527	protein_coding	ENSG00000168772	ensembl_havana	11	1	0.0260083	0.258532	2.29414	1.19795	2.29414	183.354	79.923	1.10436	4.7657	0.0260061	0.25851
CXorf38	CXorf38	761.434	703.758	759.191	308.154	507.866	604.85	X	40626921	40647562	-	3645.25	761.434	581.115	607.542	protein_coding	ENSG00000185753	ensembl_havana	13	1	0.0135256	0.185212	0.639524	-0.644929	-1.56366	474.13	741.379	-2.22956	-1.09665	0.0135239	0.185189
CYB561	CYB561	876.08	1084.08	1061.55	1532.09	1257.28	1556.67	17	63432304	63446355	-	7367.75	1556.67	1202.48	1227.96	protein_coding	ENSG00000008283	ensembl_havana	16	1	0.00221082	0.0653557	1.43852	0.52458	1.43852	1448.6	1007.01	1.13968	1.81571	0.00221023	0.0653384
CYB5D2	CYB5D2	196.807	206.152	221.816	351.556	371.028	189.337	17	4143168	4187311	+	1536.7	371.028	246.118	256.116	protein_coding	ENSG00000167740	ensembl_havana	10	1	0.0674221	0.402826	1.45921	0.545191	1.45921	303.712	208.134	-1.02746	2.18778	0.0674191	0.402809
CYB5RL	CYB5RL	58.1091	95.8779	99.0252	123.696	98.2673	233.887	1	54169651	54200037	-	708.862	233.887	107.79	118.144	protein_coding	ENSG00000215883	ensembl_havana	10	1	0.0406796	0.320748	1.80673	0.853384	1.80673	152.125	84.199	1.02541	3.1834	0.040677	0.320727
CYBA	CYBA	777.674	988.107	959.884	1874.96	1536.46	812.178	16	88643289	88651055	-	6949.27	1874.96	1095.21	1158.21	protein_coding	ENSG00000051523	ensembl_havana	11	1	0.0340256	0.295085	1.54923	0.631552	1.54923	1407.44	908.478	1.03355	2.3222	0.0340231	0.295064
CYBRD1	CYBRD1	3184.29	3099.44	3114.71	4311.85	3459.63	3776.53	2	171522247	171558130	+	20946.4	4311.85	3465.37	3491.07	protein_coding	ENSG00000071967	ensembl_havana	12	1	0.0326447	0.289023	1.22854	0.296946	1.22854	3848.83	3132.84	1.01715	1.48387	0.0326422	0.289002
CYGB	CYGB	72.6083	70.1982	76.5795	120.394	150.615	65.9681	17	76527356	76551176	-	556.364	150.615	88.079	92.7273	protein_coding	ENSG00000161544	ensembl_havana	10	1	0.103461	0.488428	1.53559	0.618793	1.53559	112.202	73.0675	-1.0913	2.57331	0.103458	0.488413
CYP26B1	CYP26B1	517.812	564.252	616.597	437.275	459.192	203.901	2	72129238	72148039	-	2799.03	616.597	441.201	466.505	protein_coding	ENSG00000003137	ensembl_havana	8	1	0.0440316	0.332832	0.647466	-0.627124	-1.54448	366.507	566.064	-2.35787	-1.01169	0.044029	0.332811
CYP2U1	CYP2U1	450.936	510.938	474.002	672.733	638.279	808.754	4	107931549	107953462	+	3555.64	808.754	579.636	592.607	protein_coding	ENSG00000155016	ensembl_havana	18	1	0.00126899	0.0469941	1.47646	0.562146	1.47646	706.851	478.746	1.16497	1.87125	0.00126858	0.046979
CYP51A1P1	CYP51A1P1	15.754	25.6419	17.9165	13.362	5.76601	5.08063	3	82806515	82808022	-	83.521	25.6419	11.8953	13.9202	processed_pseudogene	ENSG00000241095	havana	1	1	0.0736437	0.420913	0.401885	-1.31514	-2.48827	7.96583	19.8212	-6.75575	1.09113	0.0736406	0.420896
CYREN	CYREN	405.545	370.862	375.475	491.819	509.007	481.255	7	135092363	135170796	-	2633.96	509.007	435.301	438.994	protein_coding	ENSG00000122783	ensembl_havana	16	1	0.0197536	0.226409	1.28627	0.363197	1.28627	494.01	384.063	1.04089	1.58951	0.0197517	0.226386
CYS1	CYS1	38.2149	23.9918	15.844	11.9356	11.0206	13.7076	2	10056780	10080945	-	114.715	38.2149	17.2331	19.1191	protein_coding	ENSG00000205795	ensembl_havana	4	1	0.0778928	0.429877	0.467188	-1.09793	-2.14047	12.2342	26.1869	-4.98808	1.08872	0.0778897	0.42986
CYTH1	CYTH1	949.64	893.028	1222.63	887.575	779.713	766.772	17	78674048	78782298	-	5499.36	1222.63	905.22	916.56	protein_coding	ENSG00000108669	ensembl_havana	16	1	0.0727177	0.41801	0.794662	-0.331587	-1.2584	811.097	1020.68	-1.61746	1.02141	0.0727147	0.417993
CYTH2	CYTH2	2703.69	2736.83	3545.07	2332.85	2066.37	2415.95	19	48469208	48482315	+	15800.8	3545.07	2595.19	2633.46	protein_coding	ENSG00000105443	ensembl_havana	15	1	0.0188035	0.220023	0.75875	-0.398303	-1.31796	2271.72	2994.02	-1.65931	-1.04683	0.0188015	0.22
CYTH4	CYTH4	117.511	138.619	137.315	36.8917	82.6547	65.968	22	37282027	37315342	+	578.959	138.619	87.537	96.4932	protein_coding	ENSG00000100055	ensembl_havana	21	1	0.00294043	0.0757684	0.473495	-1.07858	-2.11195	62.0755	131.101	-3.45674	-1.29033	0.00293973	0.0757503
CZIB	CZIB	481.508	596.242	520.212	780.148	685.115	663.963	1	53214099	53220635	-	3727.19	780.148	612.889	621.198	protein_coding	ENSG00000162384	ensembl_havana	14	1	0.0161321	0.203972	1.33121	0.412739	1.33121	709.416	532.91	1.05446	1.6806	0.0161303	0.203949
DAAM1	DAAM1	511.124	567.806	576.986	340.706	513.377	401.806	14	59188646	59371406	+	2911.81	576.986	476.929	485.301	protein_coding	ENSG00000100592	ensembl_havana	15	1	0.0587618	0.378679	0.759167	-0.39751	-1.31723	418.924	551.82	-1.7529	1.01026	0.058759	0.37866
DAD1	DAD1	1412.04	1551.47	1474.81	2126.69	2359.33	1778.57	14	22564907	22589225	-	10702.9	2359.33	1751.12	1783.82	protein_coding	ENSG00000129562	ensembl_havana	11	1	0.00200534	0.0625159	1.41125	0.496977	1.41125	2087.98	1479.52	1.13422	1.75596	0.00200479	0.0624988
DALRD3	DALRD3	691.228	853.797	855.458	1218.61	973.272	878.06	3	49015488	49022294	-	5470.42	1218.61	898.393	911.737	protein_coding	ENSG00000178149	ensembl_havana	17	1	0.0686207	0.406959	1.27866	0.354632	1.27866	1022.82	799.913	-1.01895	1.66595	0.0686178	0.406942
DBF4B	DBF4B	332.47	291.456	368.374	260.412	202.963	184.197	17	44708608	44752265	+	1639.87	368.374	265.153	273.312	protein_coding	ENSG00000161692	ensembl_havana	18	1	0.00690447	0.125253	0.652329	-0.616329	-1.53297	215.479	330.323	-2.08998	-1.12441	0.0069033	0.125232
DBIL5P	DBIL5P	2.86612	5.33151	3.96101	18.4459	22.0413	9.42401	17	752660	755337	+	62.0698	22.0413	7.83827	10.345	transcribed_unitary_pseudogene	ENSG00000231784	havana	8	1	0.0178717	0.214536	4.07989	2.02853	4.07989	16.602	4.06922	1.27433	13.0622	0.0178698	0.214513
DCAF11	DCAF11	727.038	786.398	773.717	1196.65	940.425	762.488	14	24114195	24125243	+	5186.71	1196.65	850.911	864.452	protein_coding	ENSG00000100897	ensembl_havana	18	1	0.0970479	0.475546	1.26706	0.341485	1.26706	965.942	762.349	-1.04382	1.67579	0.0970448	0.47553
DCAF5	DCAF5	1683.36	1448.39	1612.13	1204.4	1303.19	1435.02	14	69050881	69153151	-	8686.49	1683.36	1438.3	1447.75	protein_coding	ENSG00000139990	ensembl_havana	18	1	0.0718351	0.416031	0.831496	-0.26622	-1.20265	1314.61	1581.02	-1.47026	1.01652	0.071832	0.416014
DCAF6	DCAF6	805.38	757.964	697.138	861.704	844.99	1178	1	167935783	168075844	+	5145.17	1178	845.383	857.529	protein_coding	ENSG00000143164	ensembl_havana	15	1	0.0696067	0.410107	1.27608	0.351724	1.27608	961.95	753.83	-1.01974	1.66054	0.0696037	0.41009
DCDC1	DCDC1	2.86612	1.77717	0	0	8.26547	46.2633	11	30830369	31369811	-	59.1721	46.2633	0	9.86201	protein_coding	ENSG00000170959	ensembl_havana	14	1	0.0324071	0.287954	11.3981	3.51072	11.3981	18.2293	1.59933	1.22636	105.936	0.0324047	0.287932
DCHS1	DCHS1	36.1852	12.5091	26.4067	15.1907	10.1022	7.71055	11	6621330	6655810	-	108.105	36.1852	15.551	18.0174	protein_coding	ENSG00000166341	ensembl_havana	8	1	0.0848254	0.446538	0.437482	-1.1927	-2.28581	10.9273	24.9776	-5.85297	1.1202	0.0848223	0.446522
DCTD	DCTD	1788.48	1817.14	1901.28	1876.06	2358.39	2421.09	4	182890060	182917937	-	12162.4	2421.09	2011.25	2027.07	protein_coding	ENSG00000129187	ensembl_havana	14	1	0.078884	0.431564	1.20908	0.27391	1.20908	2219.11	1835.37	-1.02215	1.49426	0.078881	0.431548
DCTN2	DCTN2	1345.16	1491.93	1402.2	1737.16	1827.58	1787.99	12	57530102	57547332	-	9592.03	1827.58	1586.97	1598.67	protein_coding	ENSG00000175203	ensembl_havana	15	1	0.00679807	0.123852	1.26257	0.336361	1.26257	1784.38	1413.29	1.06643	1.49478	0.00679692	0.123831
DCTN3	DCTN3	720.352	847.712	745.99	1045.99	945.019	887.574	9	34613545	34620524	-	5192.64	1045.99	858.255	865.439	protein_coding	ENSG00000137100	ensembl_havana	16	1	0.0455196	0.338618	1.24292	0.313729	1.24292	959.155	771.697	1.00434	1.53816	0.0455169	0.338598
DCTN4	DCTN4	1380.5	1564.81	1186.98	1653.59	1581.44	2028.77	5	150708440	150759110	-	9396.11	2028.77	1545.05	1566.02	protein_coding	ENSG00000132912	ensembl_havana	12	1	0.0545295	0.368692	1.27325	0.348518	1.27325	1754.88	1378.26	-1.00471	1.6288	0.0545266	0.368673
DCTN6	DCTN6	414.632	440.738	401.383	482.849	523.48	591.143	8	30156319	30183640	+	2854.22	591.143	471.304	475.704	protein_coding	ENSG00000104671	ensembl_havana	8	1	0.0410586	0.32266	1.27109	0.346066	1.27109	532.856	419.211	1.00979	1.60001	0.0410559	0.322639
DDB2	DDB2	304.764	292.344	351.209	268.007	238.78	202.188	11	47214465	47239218	+	1657.29	351.209	271.991	276.216	protein_coding	ENSG00000134574	ensembl_havana	12	1	0.0461049	0.340884	0.747722	-0.419427	-1.3374	236.003	315.629	-1.77966	-1.00504	0.0461022	0.340864
DDHD1	DDHD1	703.155	755.297	719.583	550.121	526.235	583.432	14	53036745	53153324	-	3837.82	755.297	633.354	639.637	protein_coding	ENSG00000100523	ensembl_havana	16	1	0.00669475	0.123349	0.762049	-0.392044	-1.31225	553.358	726.144	-1.59705	-1.07824	0.00669361	0.123328
DDIT4	DDIT4	3316.12	3382.85	4119.43	2997.99	3235.48	1237.12	10	72273924	72276037	+	18289	4119.43	2866.3	3048.16	protein_coding	ENSG00000168209	ensembl_havana	5	1	0.0997398	0.480644	0.690513	-0.534259	-1.4482	2489.91	3605.88	-2.25071	1.07316	0.0997366	0.480629
DDOST	DDOST	3075.17	3471.15	3397.3	4702.76	4312.25	3399.9	1	20651767	20661545	-	22358.5	4702.76	3684.12	3726.42	protein_coding	ENSG00000244038	ensembl_havana	10	1	0.0587142	0.378623	1.2484	0.320081	1.2484	4137.76	3314.45	-1.00821	1.57129	0.0587113	0.378604
DDR1	DDR1	2603.39	2537.8	2573.33	3091.31	2891.07	3329.25	6	30876421	30900157	+	17026.1	3329.25	2822.75	2837.69	protein_coding	ENSG00000204580	ensembl_havana	13	1	0.0276633	0.267092	1.2071	0.271549	1.2071	3104.03	2571.47	1.02091	1.42726	0.027661	0.26707
DDR2	DDR2	54.4563	28.4347	44.8914	14.1057	22.0413	19.7047	1	162631373	162787406	+	183.634	54.4563	27.429	30.6057	protein_coding	ENSG00000162733	ensembl_havana	19	1	0.0203862	0.229545	0.439581	-1.1858	-2.27489	18.6882	42.5137	-4.55653	-1.13576	0.0203842	0.229522
DDX11	DDX11	727.11	657.662	610.538	503.027	437.697	535.591	12	31073860	31104800	+	3471.63	727.11	570.364	578.604	protein_coding	ENSG00000013573	ensembl_havana	17	1	0.0111535	0.164858	0.739429	-0.435516	-1.35239	492.134	665.559	-1.70747	-1.07116	0.011152	0.164836
DDX12P	DDX12P	29.0618	51.7143	55.4604	26.3572	13.4978	9.38763	12	9418673	9448230	-	185.479	55.4604	25.5528	30.9132	unprocessed_pseudogene	ENSG00000214826	havana	5	1	0.0114737	0.167984	0.358727	-1.47904	-2.78764	16.254	45.3101	-6.17214	-1.25903	0.0114721	0.167962
DDX21	DDX21	3832.83	4000.35	3648.13	3126.01	3554.25	2563.35	10	68956170	68985069	+	20724.9	4000.35	3417.48	3454.16	protein_coding	ENSG00000165732	ensembl_havana	13	1	0.0589672	0.379244	0.804973	-0.312987	-1.24228	3080.99	3827.44	-1.55599	1.00825	0.0589643	0.379225
DDX39B	DDX39B	6565.38	6182.78	7152.2	4614.1	4450.58	5109.65	6	31530219	31542449	-	34074.7	7152.2	5588.51	5679.12	protein_coding	ENSG00000198563	ensembl_havana	14	1	0.000227038	0.0153143	0.712394	-0.489252	-1.40372	4725.01	6632.58	-1.68102	-1.17216	0.000226918	0.0153062
DDX3X	DDX3X	11564.8	9986.76	11254.6	5732.3	6287.25	7365.23	X	41333284	41364473	+	52190.9	11564.8	8374.87	8698.49	protein_coding	ENSG00000215301	ensembl_havana	10	1	7.31705e-07	0.000230325	0.590955	-0.75888	-1.69218	6462.13	10935.1	-2.08374	-1.37419	7.30517e-07	0.000229951
DDX46	DDX46	2074.13	2069.51	1814.24	1568.98	1651.27	1838.54	5	134758771	134855134	+	11016.7	2074.13	1826.21	1836.11	protein_coding	ENSG00000145833	ensembl_havana	16	1	0.0982399	0.478343	0.848957	-0.236237	-1.17792	1686.65	1986.73	-1.43025	1.03082	0.0982368	0.478328
DDX58	DDX58	2049.29	1786.92	1984.45	1185.97	1326.14	1262.81	9	32455302	32526209	-	9595.58	2049.29	1560.36	1599.26	protein_coding	ENSG00000107201	ensembl_havana	10	1	4.49141e-06	0.000801967	0.648778	-0.624202	-1.54136	1258.55	1939.88	-1.85432	-1.28122	4.48598e-06	0.000800999
DEAF1	DEAF1	857.923	820.162	957.244	1091.56	1048.8	1710.02	11	644233	706716	-	6485.71	1710.02	1047.17	1080.95	protein_coding	ENSG00000177030	ensembl_havana	17	1	0.0174386	0.212372	1.46205	0.547992	1.46205	1283.86	878.122	1.06896	1.99969	0.0174368	0.212349
DECR1	DECR1	396.48	526.042	447.593	622.818	568.482	846.446	8	90001405	90053634	+	3407.86	846.446	550.977	567.977	protein_coding	ENSG00000104325	ensembl_havana	7	1	0.0110569	0.164001	1.48735	0.572749	1.48735	679.516	456.862	1.09502	2.02027	0.0110554	0.163978
DECR2	DECR2	85.0282	111.962	120.119	188.799	147.86	154.211	16	401858	412488	+	807.979	188.799	130.427	134.663	protein_coding	ENSG00000242612	ensembl_havana	7	1	0.0194823	0.224515	1.5501	0.632361	1.5501	163.433	105.434	1.07314	2.23905	0.0194803	0.224493
DEF6	DEF6	281.835	273.684	254.825	353.726	308.578	393.238	6	35297818	35321772	+	1865.89	393.238	307.394	310.981	protein_coding	ENSG00000023892	ensembl_havana	11	1	0.048066	0.347522	1.30165	0.380341	1.30165	351.93	270.372	1.00225	1.69049	0.0480632	0.347503
DENND1A	DENND1A	538.832	441.628	435.711	371.087	400.415	325.557	9	123379654	123930153	-	2513.23	538.832	413.733	418.872	protein_coding	ENSG00000119522	ensembl_havana	16	1	0.0526316	0.362043	0.773928	-0.369728	-1.29211	365.569	472.355	-1.67442	1.00292	0.0526288	0.362024
DENND2A	DENND2A	117.511	45.3178	68.6575	43.402	41.3274	28.272	7	140518420	140673994	-	344.488	117.511	51.4466	57.4146	protein_coding	ENSG00000146966	ensembl_havana	13	1	0.0288305	0.271867	0.486956	-1.03814	-2.05357	37.5864	77.1865	-3.915	-1.07718	0.0288281	0.271846
DENND2D	DENND2D	39.1703	72.864	55.4541	98.7395	129.492	339.264	1	111185969	111204536	-	734.984	339.264	93.9246	122.497	protein_coding	ENSG00000162777	ensembl_havana	17	1	0.000484214	0.025747	3.39013	1.76134	3.39013	189.407	55.8702	1.70765	6.73029	0.000484006	0.0257359
DENND4B	DENND4B	828.289	666.44	782.96	651.002	643.788	586.858	1	153929501	153946719	-	4159.34	828.289	688.267	693.223	protein_coding	ENSG00000198837	ensembl_havana	10	1	0.0927842	0.465802	0.826258	-0.275335	-1.21028	627.039	758.89	-1.51192	1.03219	0.0927811	0.465787
DEPP1	DEPP1	988.811	977.444	1239.8	794.257	1012.27	568.011	10	44970981	44978810	-	5580.59	1239.8	904.402	930.098	protein_coding	ENSG00000165507	ensembl_havana	9	1	0.0768603	0.428707	0.740857	-0.432733	-1.34979	791.374	1068.19	-1.88182	1.03287	0.0768572	0.42869
DERA	DERA	330.559	433.63	343.287	512.143	525.316	771.915	12	15911302	16037382	+	2916.85	771.915	465.838	486.142	protein_coding	ENSG00000023697	ensembl_havana	13	1	0.00312336	0.0780733	1.63342	0.707892	1.63342	603.471	369.454	1.17971	2.26162	0.00312263	0.0780551
DESI2	DESI2	1348.03	1288.45	1315.05	925.547	1093.8	1120.6	1	244653103	244709034	+	7091.48	1348.03	1171.97	1181.91	protein_coding	ENSG00000121644	ensembl_havana	19	1	0.0228706	0.242972	0.795015	-0.330946	-1.25784	1047.16	1317.16	-1.53261	-1.03233	0.0228685	0.242949
DET1	DET1	81.555	49.2615	69.9778	82.5163	87.5306	137.726	15	88494440	88546676	-	508.567	137.726	80.8672	84.7612	protein_coding	ENSG00000140543	ensembl_havana	14	1	0.0952392	0.470467	1.5381	0.621153	1.5381	102.776	66.8197	-1.07815	2.55065	0.0952361	0.470451
DFFA	DFFA	1313.64	1339.99	1411.44	1740.42	1622.79	1638.06	1	10456522	10472530	-	9066.33	1740.42	1502.27	1511.06	protein_coding	ENSG00000160049	ensembl_havana	12	1	0.0153674	0.198492	1.23055	0.2993	1.23055	1666.83	1354.55	1.04049	1.45533	0.0153657	0.198469
DGKD	DGKD	1036.58	824.606	866.139	654.285	702.566	550.875	2	233354507	233472105	+	4635.05	1036.58	756.526	772.508	protein_coding	ENSG00000077044	ensembl_havana	10	1	0.00457315	0.0984075	0.699169	-0.516286	-1.43027	635.727	909.26	-1.83163	-1.11685	0.00457224	0.0983877
DGUOK	DGUOK	408.899	477.17	369.694	706.368	542.766	452.352	2	73926826	73958962	+	2957.25	706.368	481.81	492.875	protein_coding	ENSG00000114956	ensembl_havana	20	1	0.0583884	0.377916	1.35237	0.435495	1.35237	566.691	419.034	-1.01077	1.84862	0.0583855	0.377897
DHDDS	DHDDS	549.339	560.698	547.939	669.478	731.951	611.702	1	26432282	26471307	+	3671.11	731.951	608.149	611.851	protein_coding	ENSG00000117682	ensembl_havana	17	1	0.0700884	0.411524	1.21386	0.279598	1.21386	670.943	552.736	-1.01603	1.49707	0.0700854	0.411507
DHFR2	DHFR2	75.4745	118.182	72.6185	155.162	119.39	131.079	3	94047836	94063390	-	671.907	155.162	107.84	111.984	protein_coding	ENSG00000178700	ensembl_havana	8	1	0.0578806	0.377614	1.51526	0.599567	1.51526	135.085	89.1495	-1.01398	2.32812	0.0578777	0.377596
DHFRP1	DHFRP1	142.032	163.268	95.9071	241.091	176.629	236.902	18	26170726	26171285	-	1055.83	241.091	167.942	175.972	processed_pseudogene	ENSG00000188985	havana	6	1	0.0160662	0.203972	1.62363	0.699221	1.62363	218.14	134.353	1.09426	2.40908	0.0160644	0.203949
DHH	DHH	11.4645	6.2201	3.96101	10.8505	25.7148	25.7018	12	49086656	49094802	-	83.9127	25.7148	11.2484	13.9855	protein_coding	ENSG00000139549	ensembl_havana	4	1	0.0523318	0.361787	2.84847	1.51019	2.84847	20.8357	7.31471	-1.01061	8.19991	0.052329	0.361768
DHRS3	DHRS3	26.7504	18.6603	26.4067	57.5077	16.5309	146.5	1	12567910	12618211	-	292.357	146.5	34.9922	48.7261	protein_coding	ENSG00000162496	ensembl_havana	9	1	0.0234684	0.246396	3.08047	1.62315	3.08047	73.6048	23.894	1.16397	8.15256	0.0234662	0.246374
DHRS4-AS1	DHRS4-AS1	149.038	143.062	153.159	272.348	253.475	157.638	14	23938219	24052556	-	1128.72	272.348	181.321	188.12	lncRNA	ENSG00000215256	havana	4	1	0.0278794	0.268192	1.5337	0.617017	1.5337	227.509	148.34	1.04758	2.24539	0.0278771	0.26817
DHRS7B	DHRS7B	256.04	226.589	225.777	329.855	350.823	319.56	17	21123364	21193266	+	1708.64	350.823	280.241	284.774	protein_coding	ENSG00000109016	ensembl_havana	17	1	0.00652258	0.121348	1.41088	0.496598	1.41088	333.401	236.306	1.10099	1.808	0.00652146	0.121327
DHX32	DHX32	820.662	828.158	754.795	583.559	689.209	687.981	10	125836337	125896437	-	4364.36	828.158	722.248	727.394	protein_coding	ENSG00000089876	ensembl_havana	12	1	0.0580403	0.377614	0.815796	-0.29372	-1.2258	653.985	801.653	-1.51304	1.00696	0.0580374	0.377596
DHX38	DHX38	926.236	880.952	892.86	787.495	713.585	738.496	16	72093613	72112913	+	4939.62	926.236	819.25	823.271	protein_coding	ENSG00000140829	ensembl_havana	12	1	0.0465745	0.342119	0.829155	-0.270286	-1.20605	746.282	900.051	-1.45042	-1.00285	0.0465718	0.342099
DIABLO	DIABLO	1188.97	1314.55	1168.43	1588.58	1356.03	1503.82	12	122207668	122227457	-	8120.39	1588.58	1344.84	1353.4	protein_coding	ENSG00000184047	ensembl_havana	19	1	0.0532432	0.363232	1.21078	0.27594	1.21078	1482.56	1224.47	-1.00268	1.46992	0.0532404	0.363213
DICER1	DICER1	1771.25	1295.55	1527.62	1059	1273.8	1268.82	14	95086228	95158011	-	8196.05	1771.25	1348.01	1366.01	protein_coding	ENSG00000100697	ensembl_havana	14	1	0.0521411	0.36151	0.784194	-0.350718	-1.2752	1200.87	1531.34	-1.62979	1.00226	0.0521383	0.361491
DIP2C	DIP2C	855.06	630.01	734.105	521.908	557.46	667.389	10	274190	689669	-	3965.93	855.06	651.951	660.989	protein_coding	ENSG00000151240	ensembl_havana	17	1	0.0797551	0.433596	0.787636	-0.344398	-1.26962	582.565	739.638	-1.65824	1.02872	0.079752	0.433579
DIRAS3	DIRAS3	3.82149	14.2174	9.24235	23.8711	22.9596	23.1317	1	68045886	68051632	-	97.2436	23.8711	13.6138	16.2073	protein_coding	ENSG00000162595	havana	7	1	0.0562263	0.372606	2.5559	1.35383	2.5559	23.3163	9.12256	-1.02523	6.69739	0.0562234	0.372587
DLC1	DLC1	693.603	724.196	864.82	316.835	435.315	704.231	8	13083361	13604611	-	3739	864.82	590.03	623.167	protein_coding	ENSG00000164741	ensembl_havana	15	1	0.0296603	0.275953	0.63885	-0.64645	-1.56531	485.906	760.595	-2.3442	-1.04522	0.029658	0.275931
DLEU2	DLEU2	66.6827	58.6285	64.6982	107.204	101.371	104.581	13	49956670	50125721	-	503.165	107.204	81.2391	83.8608	lncRNA	ENSG00000231607	ensembl_havana	12	1	0.0100499	0.154317	1.64952	0.722048	1.64952	104.358	63.2657	1.12683	2.41466	0.0100485	0.154295
DLGAP1-AS2	DLGAP1-AS2	42.9918	66.6439	59.4151	28.2113	30.3067	29.1287	18	3603000	3608337	+	256.698	66.6439	40.2304	42.7829	lncRNA	ENSG00000262001	havana	1	1	0.0196045	0.225465	0.5189	-0.946471	-1.92715	29.2299	56.3305	-3.34341	-1.11082	0.0196025	0.225442
DLGAP4	DLGAP4	5470.31	4951.86	5481.91	4481.26	4784.69	2984.56	20	36306336	36528638	+	28154.6	5481.91	4602.29	4692.43	protein_coding	ENSG00000080845	ensembl_havana	17	1	0.0664277	0.40012	0.770233	-0.376632	-1.29831	4083.14	5301.17	-1.7157	1.01786	0.0664247	0.400102
DMAC1	DMAC1	118.466	137.731	124.112	245.221	222.249	191.05	9	7796500	7888381	-	1038.83	245.221	166.213	173.138	protein_coding	ENSG00000137038	ensembl_havana	8	1	0.000644315	0.0305071	1.72806	0.789155	1.72806	219.257	126.88	1.26215	2.36597	0.00064406	0.0304951
DMAC2L	DMAC2L	301.898	293.233	246.903	371.087	361.844	346.118	14	50312324	50335559	+	1921.08	371.087	317.057	320.18	protein_coding	ENSG00000125375	ensembl_havana	16	1	0.0527358	0.362309	1.27827	0.354195	1.27827	359.576	281.298	-1.0029	1.63873	0.052733	0.36229
DMBT1	DMBT1	26.7504	24.8804	34.3287	11.9356	17.4493	16.2778	10	122560665	122643741	+	131.622	34.3287	20.6464	21.937	protein_coding	ENSG00000187908	ensembl_havana	19	1	0.0923052	0.464079	0.535867	-0.900054	-1.86614	15.2807	28.5158	-3.85841	1.10795	0.0923021	0.464063
DMTF1	DMTF1	830.219	795.284	761.833	590.267	540.011	601.423	7	87152361	87196338	+	4119.04	830.219	677.175	686.506	protein_coding	ENSG00000135164	ensembl_havana	18	1	0.00135162	0.0484366	0.725029	-0.46389	-1.37926	577.21	796.12	-1.67898	-1.13303	0.0013512	0.0484215
DNAAF3	DNAAF3	118.145	139.239	129.393	224.605	167.87	137.933	19	55158661	55166723	-	917.185	224.605	149.288	152.864	protein_coding	ENSG00000167646	ensembl_havana	14	1	0.104803	0.491163	1.36833	0.452417	1.36833	176.446	128.95	-1.06752	1.99876	0.1048	0.491149
DNAH11	DNAH11	392.068	302.695	237.996	123.306	204.687	120.431	7	21543039	21901840	+	1381.18	392.068	210.035	230.197	protein_coding	ENSG00000105877	ensembl_havana	18	1	0.00076458	0.0335629	0.480384	-1.05774	-2.08167	149.552	311.317	-3.19045	-1.35822	0.000764293	0.0335503
DNAH17	DNAH17	10.5091	5.33151	14.5237	0	3.67354	2.57018	17	78423697	78577397	-	36.608	14.5237	0	6.10134	protein_coding	ENSG00000187775	ensembl_havana	17	1	0.0636699	0.39355	0.211759	-2.23951	-4.72235	2.12809	10.0496	-24.3592	1.09231	0.063667	0.393532
DNAH2	DNAH2	33.4381	46.2064	43.5711	44.4871	38.5722	156.781	17	7717354	7833745	+	363.056	156.781	51.2457	60.5093	protein_coding	ENSG00000183914	ensembl_havana	14	1	0.104774	0.49116	1.95167	0.964707	1.95167	80.1254	41.0549	-1.14943	4.37817	0.104771	0.491145
DNAJC19	DNAJC19	164.324	253.247	221.816	274.518	358.22	317.503	3	180983709	180989775	-	1589.63	358.22	257.011	264.938	protein_coding	ENSG00000205981	ensembl_havana	8	1	0.0203895	0.229545	1.48707	0.572473	1.48707	316.919	213.117	1.06338	2.07958	0.0203875	0.229522
DNAJC19P9	DNAJC19P9	14.3306	28.4347	18.4847	43.402	39.4413	47.4633	14	45290036	45290387	+	191.557	47.4633	29.1378	31.9261	processed_pseudogene	ENSG00000258608	havana	1	1	0.0260054	0.258532	2.11672	1.08183	2.11672	43.4483	20.5262	1.0938	4.09628	0.0260031	0.25851
DNAJC22	DNAJC22	76.4298	45.3179	69.9778	103.08	80.818	124.226	12	49346888	49357547	+	499.849	124.226	79.4141	83.3081	protein_coding	ENSG00000178401	ensembl_havana	16	1	0.0538126	0.365444	1.6126	0.689389	1.6126	102.755	63.72	-1.00787	2.62094	0.0538098	0.365425
DNAJC24	DNAJC24	376.417	424.744	411.945	506.718	413.274	843.021	11	31369840	31432836	+	2976.12	843.021	475.97	496.02	protein_coding	ENSG00000170946	ensembl_havana	15	1	0.0581777	0.377614	1.45408	0.540108	1.45408	587.957	404.349	-1.01305	2.14194	0.0581749	0.377596
DNAJC9	DNAJC9	1442.36	1511.43	1507.76	1400.62	1215.49	967.345	10	73183362	73247256	-	8044.99	1511.43	1325.08	1340.83	protein_coding	ENSG00000213551	ensembl_havana	7	1	0.0784258	0.430721	0.80283	-0.316834	-1.24559	1193.91	1487.12	-1.59073	1.02528	0.0784227	0.430704
DNAL4	DNAL4	101.27	139.508	153.159	209.415	207.555	188.48	22	38778508	38794199	-	999.387	209.415	161.475	166.564	protein_coding	ENSG00000100246	ensembl_havana	13	1	0.0140374	0.188029	1.5408	0.623682	1.5408	201.74	130.932	1.09129	2.17548	0.0140358	0.188006
DNALI1	DNALI1	57.3224	77.3069	60.7355	58.5927	97.3489	193.621	1	37556919	37566858	+	544.927	193.621	81.6931	90.8211	protein_coding	ENSG00000163879	ensembl_havana	11	1	0.0741552	0.422699	1.79126	0.840973	1.79126	116.784	65.1968	-1.05855	3.39648	0.0741521	0.422682
DOCK10	DOCK10	469.089	442.516	452.875	231.115	348.988	301.568	2	224765090	225042446	-	2246.15	469.089	362.965	374.359	protein_coding	ENSG00000135905	ensembl_havana	19	1	0.0031473	0.0782132	0.646979	-0.628208	-1.54564	294.262	454.824	-2.0636	-1.1577	0.00314657	0.078195
DOCK11	DOCK11	435.65	316.337	446.273	319.005	304.83	271.583	X	118495898	118686164	+	2093.68	446.273	342.853	348.946	protein_coding	ENSG00000147251	ensembl_havana	15	1	0.0526516	0.362043	0.747904	-0.419074	-1.33707	298.306	398.856	-1.79371	1.00333	0.0526488	0.362024
DOCK6	DOCK6	1261.08	1052.08	1362.59	938.568	1125.94	748.78	19	11199295	11262525	-	6489.04	1362.59	1061.49	1081.51	protein_coding	ENSG00000130158	ensembl_havana	14	1	0.0641167	0.394304	0.765592	-0.385353	-1.30618	937.629	1224.71	-1.73305	1.01579	0.0641137	0.394286
DOK3	DOK3	99.3588	127.956	175.605	121.526	59.6951	72.8219	5	177501907	177511275	-	656.962	175.605	102.789	109.494	protein_coding	ENSG00000146094	ensembl_havana	14	1	0.0840985	0.444222	0.630361	-0.66575	-1.58639	84.4334	133.944	-2.67797	1.0641	0.0840954	0.444206
DOT1L	DOT1L	1398.26	1116.85	1224.79	776.279	741.146	1062.34	19	2163933	2232579	+	6319.66	1398.26	1026.37	1053.28	protein_coding	ENSG00000104885	ensembl_havana	18	1	0.00821272	0.139044	0.690077	-0.535171	-1.44911	860.267	1246.63	-1.90792	-1.10064	0.00821144	0.139022
DPH3	DPH3	945.817	1051.2	961.21	1276.02	1297.68	1292.81	3	16257061	16264970	-	6824.73	1297.68	1126.71	1137.46	protein_coding	ENSG00000154813	ensembl_havana	10	1	0.00290481	0.0756139	1.3066	0.385817	1.3066	1288.89	986.444	1.09571	1.55808	0.00290411	0.0755958
DPH5	DPH5	183.432	265.687	228.418	451.381	427.967	434.362	1	100989623	101026089	-	1991.25	451.381	312.654	331.875	protein_coding	ENSG00000117543	ensembl_havana	21	1	4.95285e-06	0.000859066	1.93797	0.954544	1.93797	437.842	225.928	1.45891	2.57433	4.94696e-06	0.000858045
DPP4	DPP4	41.081	31.9891	50.1728	9.76545	20.2045	14.5644	2	161992245	162074216	-	167.777	50.1728	23.9657	27.9629	protein_coding	ENSG00000197635	ensembl_havana	10	1	0.00610116	0.116788	0.364849	-1.45463	-2.74086	14.9257	40.9092	-5.63442	-1.33329	0.00610007	0.116767
DPP9	DPP9	5059.92	4844.06	5426.6	4104.7	4169.85	3274.89	19	4675224	4724674	-	26880	5426.6	4419.91	4480	protein_coding	ENSG00000142002	ensembl_havana	17	1	0.00759299	0.13347	0.753358	-0.408592	-1.32739	3849.42	5109.68	-1.63418	-1.0782	0.00759176	0.133449
DPY19L4	DPY19L4	1304.08	1430.62	1223.95	1330.27	1531.87	2687.56	8	94719703	94793837	+	9508.36	2687.56	1523.53	1584.73	protein_coding	ENSG00000156162	ensembl_havana	16	1	0.0733887	0.420587	1.40206	0.487545	1.40206	1850.37	1319.75	-1.03252	2.0297	0.0733856	0.420569
DPYD	DPYD	1340.39	1242.24	1094.56	2389.28	1598.9	2421.1	1	97077743	97995001	-	10086.5	2421.1	1601.26	1681.08	protein_coding	ENSG00000188641	ensembl_havana	14	1	0.000124536	0.00984589	1.74229	0.800984	1.74229	2136.31	1226.15	1.31207	2.31357	0.00012446	0.00983985
DPYSL2	DPYSL2	2268.06	2172.58	2000.32	4335.9	2965.44	3644.42	8	26514031	26658179	+	17386.7	4335.9	2780.28	2897.79	protein_coding	ENSG00000092964	ensembl_havana	18	1	2.39805e-05	0.00293253	1.6989	0.764604	1.6989	3648.14	2147.35	1.32855	2.1725	2.39594e-05	0.00292994
DPYSL3	DPYSL3	1896.44	1869.6	1948.84	1116.53	1664.1	1351.89	5	147390808	147510069	-	9847.4	1948.84	1609.07	1641.23	protein_coding	ENSG00000113657	ensembl_havana	13	1	0.0112393	0.165982	0.723383	-0.467169	-1.38239	1377.92	1904.83	-1.77564	-1.07624	0.0112378	0.16596
DRAM1	DRAM1	546.474	617.566	660.168	503.463	487.663	509.753	12	101877580	102012131	+	3325.09	660.168	550.671	554.181	protein_coding	ENSG00000136048	ensembl_havana	14	1	0.0780745	0.43014	0.823502	-0.280157	-1.21433	500.296	607.522	-1.50712	1.02206	0.0780715	0.430123
DRAM2	DRAM2	287.568	313.671	257.466	422.085	366.436	382.1	1	111117333	111140217	-	2029.32	422.085	333.363	338.221	protein_coding	ENSG00000156171	ensembl_havana	14	1	0.0162041	0.204634	1.35985	0.443449	1.35985	390.001	286.797	1.05845	1.74708	0.0162023	0.204611
DRP2	DRP2	61.1439	60.4238	67.3371	16.2758	48.6744	19.7047	X	101219769	101264498	+	273.56	67.3371	39.6465	45.5933	protein_coding	ENSG00000102385	ensembl_havana	12	1	0.025619	0.256613	0.449818	-1.15259	-2.22312	28.3016	62.9179	-4.48379	-1.10225	0.0256168	0.256591
DSCC1	DSCC1	214.004	248.804	231.059	354.811	241.535	320.416	8	119833976	119855895	-	1610.63	354.811	263.906	268.438	protein_coding	ENSG00000136982	ensembl_havana	6	1	0.0797911	0.433596	1.32004	0.400585	1.32004	305.375	231.337	-1.03353	1.80094	0.079788	0.433579
DSE	DSE	864.417	903.824	803.71	560.273	637.167	636.956	6	116254173	116444862	+	4406.35	903.824	722.955	734.391	protein_coding	ENSG00000111817	ensembl_havana	19	1	0.00116719	0.0452966	0.713169	-0.487685	-1.40219	611.799	857.86	-1.71961	-1.14337	0.00116681	0.0452817
DSEL	DSEL	237.413	180.365	265.388	353.141	326.436	697.056	18	67506587	67516721	-	2059.8	697.056	311.477	343.3	protein_coding	ENSG00000171451	ensembl_havana	14	1	0.0026628	0.0729809	2.01898	1.01363	2.01898	459.168	227.426	1.27663	3.19301	0.00266214	0.0729629
DSG4	DSG4	0	0.888585	0	0	4.59193	21.4182	18	31376777	31414913	+	26.8987	21.4182	0	4.48312	protein_coding	ENSG00000175065	ensembl_havana	12	1	0.0365699	0.307426	23.3895	4.54779	23.3895	8.70462	0.37216	1.21761	449.297	0.0365674	0.307405
DSP	DSP	4661.26	2584.88	3500.29	1331.35	2556.78	2972.85	6	7541617	7586715	+	17607.4	4661.26	2743.9	2934.57	protein_coding	ENSG00000096696	ensembl_havana	14	1	0.0424798	0.328812	0.638564	-0.647097	-1.56601	2287.4	3582.09	-2.41537	-1.01533	0.0424771	0.328792
DST-AS1	DST-AS1	1.91075	4.44293	1.32034	6.5103	11.0206	16.2778	6	56843928	56864079	+	41.4828	16.2778	4.85467	6.9138	lncRNA	ENSG00000231441	havana	2	1	0.0457613	0.339525	4.30052	2.10451	4.30052	11.3197	2.63218	1.02786	17.9932	0.0457586	0.339505
DSTN	DSTN	6446.91	7909.67	7764.97	9731.27	9628.78	7754.42	20	17570075	17609920	+	49236	9731.27	8125	8206	protein_coding	ENSG00000125868	ensembl_havana	16	1	0.0712789	0.414848	1.22569	0.2936	1.22569	9037.78	7373.6	-1.01779	1.52905	0.0712759	0.414831
DTNA	DTNA	396.48	322.557	433.07	270.177	294.802	204.758	18	34493290	34891845	+	1921.84	433.07	310.91	320.307	protein_coding	ENSG00000134769	ensembl_havana	21	1	0.0127412	0.178398	0.6685	-0.581	-1.49589	256.4	383.544	-2.0536	-1.08964	0.0127396	0.178375
DTX3	DTX3	215.914	231.921	282.552	368.918	282.863	346.975	12	57604622	57609805	+	1729.14	368.918	282.87	288.19	protein_coding	ENSG00000178498	ensembl_havana	16	1	0.037754	0.311372	1.37006	0.454237	1.37006	332.768	242.886	1.01798	1.84392	0.0377515	0.311351
DTX4	DTX4	25.7951	12.4402	40.9304	8.6804	5.51032	10.2807	11	59171430	59208589	+	103.637	40.9304	13.6466	17.2729	protein_coding	ENSG00000110042	ensembl_havana	8	1	0.0209524	0.232668	0.31201	-1.68033	-3.20502	8.16213	26.1598	-8.61444	-1.19244	0.0209504	0.232646
DUOX1	DUOX1	91.6047	78.1955	78.1767	14.1057	37.5623	62.5947	15	45129933	45165577	+	362.24	91.6047	51.4608	60.3733	protein_coding	ENSG00000137857	ensembl_havana	17	1	0.0346948	0.298151	0.463441	-1.10954	-2.15777	38.3203	82.6864	-4.40536	-1.05689	0.0346923	0.298129
DUOXA1	DUOXA1	79.296	90.2204	81.8608	11.9356	40.9184	50.541	15	45117367	45129939	-	354.772	90.2204	49.356	59.1287	protein_coding	ENSG00000140254	ensembl_havana	12	1	0.0139378	0.187884	0.413889	-1.27268	-2.41611	34.6908	83.8167	-4.88087	-1.19601	0.0139362	0.187862
DUS1L	DUS1L	1282.11	1309.77	1501.22	1082.88	1031.35	676.815	17	82057506	82065888	-	6884.15	1501.22	1113.45	1147.36	protein_coding	ENSG00000169718	ensembl_havana	18	1	0.0112675	0.16611	0.681767	-0.55265	-1.46678	929.92	1363.99	-1.97254	-1.09069	0.011266	0.166088
DUSP16	DUSP16	264.638	293.233	301.037	158.417	191.943	192.764	12	12473282	12562864	-	1402.03	301.037	227.029	233.672	protein_coding	ENSG00000111266	ensembl_havana	9	1	0.00128572	0.0472393	0.633687	-0.658158	-1.57807	181.306	286.112	-2.0833	-1.19536	0.00128531	0.0472242
DUSP22	DUSP22	1036.59	1040.54	1157.94	878.891	937.677	826.745	6	291630	351356	+	5878.37	1157.94	973.46	979.729	protein_coding	ENSG00000112679	ensembl_havana	14	1	0.0413301	0.323925	0.817515	-0.290683	-1.22322	881.027	1077.69	-1.48446	-1.00796	0.0413275	0.323904
DUSP4	DUSP4	14319.6	16069.5	14225.5	17588.3	16460.8	23127.3	8	29333064	29350685	-	101791	23127.3	16728.9	16965.2	protein_coding	ENSG00000120875	ensembl_havana	9	1	0.0402478	0.319921	1.28156	0.357906	1.28156	19059.2	14871.8	1.0111	1.62438	0.0402452	0.319901
DUX4L33	DUX4L33	26.7504	2.66576	76.5795	0	6.4287	0	20	29324092	29325050	+	112.424	76.5795	0	18.7374	unprocessed_pseudogene	ENSG00000282894	havana	1	1	0.00529522	0.107473	0.0614085	-4.02542	-16.2844	2.16196	35.2062	-115.74	-2.29117	0.00529422	0.107453
DXO	DXO	354.686	338.507	342.12	297.08	292.028	232.037	6	31969810	31972291	-	1856.46	354.686	306.366	309.41	protein_coding	ENSG00000204348	ensembl_havana	10	1	0.0826398	0.440545	0.792248	-0.335976	-1.26223	273.426	345.127	-1.64193	1.03057	0.0826367	0.440528
DYNLL1	DYNLL1	2905.31	3335.76	3645.48	5079.02	5077.76	4527.84	12	120469850	120498494	+	24571.2	5079.02	4004.8	4095.19	protein_coding	ENSG00000088986	ensembl_havana	11	1	0.000101238	0.00851907	1.48561	0.571052	1.48561	4894.64	3294.71	1.21686	1.81371	0.000101173	0.00851357
DYNLRB1	DYNLRB1	1931.13	2080.18	2026.32	2648.6	2692.17	2245.31	20	34516409	34540959	+	13623.7	2692.17	2251.66	2270.62	protein_coding	ENSG00000125971	ensembl_havana	16	1	0.0181072	0.215989	1.25629	0.329173	1.25629	2528.34	2012.54	1.03972	1.51798	0.0181053	0.215966
DYNLT3	DYNLT3	1850.56	2100.62	2230.05	1247.81	1589.73	1767.43	X	37836757	37847572	-	10786.2	2230.05	1766.56	1797.7	protein_coding	ENSG00000165169	ensembl_havana	11	1	0.0208436	0.232387	0.745405	-0.423904	-1.34155	1535.54	2060.01	-1.72124	-1.04562	0.0208416	0.232364
DYRK4	DYRK4	96.4927	132.399	133.354	213.755	213.984	221.036	12	4562204	4615303	+	1011.02	221.036	160.703	168.503	protein_coding	ENSG00000010219	ensembl_havana	13	1	0.000443673	0.0244785	1.79463	0.843685	1.79463	216.286	120.519	1.29499	2.48704	0.000443478	0.0244677
DYSF	DYSF	680.224	527.819	761.833	506.72	472.969	221.892	2	71453722	71686769	+	3171.46	761.833	494.072	528.576	protein_coding	ENSG00000135636	ensembl_havana	14	1	0.0272851	0.265479	0.609792	-0.71361	-1.6399	400.211	656.307	-2.54422	-1.05702	0.0272828	0.265457
E2F2	E2F2	42.0364	47.9836	40.9304	83.5489	63.3686	80.5324	1	23506438	23531234	-	358.4	83.5489	57.2477	59.7334	protein_coding	ENSG00000007968	ensembl_havana	7	1	0.0205479	0.230543	1.73144	0.791975	1.73144	75.7623	43.7567	1.0881	2.75517	0.0205459	0.230521
E2F6P1	E2F6P1	68.7184	62.5658	50.5234	92.7793	62.3594	122.521	22	18833694	18834439	+	459.467	122.521	73.2112	76.5778	processed_pseudogene	ENSG00000234764	havana	2	1	0.107133	0.495815	1.52348	0.607369	1.52348	92.6199	60.795	-1.09541	2.54243	0.10713	0.4958
E2F7	E2F7	3470.83	3646.67	3682.46	2154.91	2316.19	1713.43	12	77021248	77065570	-	16984.5	3682.46	2712.83	2830.75	protein_coding	ENSG00000165891	ensembl_havana	16	1	6.03229e-07	0.000203829	0.572577	-0.804459	-1.74649	2061.19	3599.85	-2.17408	-1.403	6.0222e-07	0.000203489
EAPP	EAPP	474.82	494.941	613.956	661.881	802.671	688.81	14	34515938	34539712	-	3737.08	802.671	612.5	622.847	protein_coding	ENSG00000129518	ensembl_havana	9	1	0.0160815	0.203972	1.36212	0.445857	1.36212	717.93	527.067	1.05908	1.75187	0.0160797	0.203949
EBAG9	EBAG9	299.987	362.542	326.123	438.36	405.927	765.914	8	109539711	109565997	+	2598.85	765.914	411.197	433.142	protein_coding	ENSG00000147654	ensembl_havana	15	1	0.0131209	0.181916	1.62939	0.704333	1.62939	537.064	329.61	1.10788	2.39639	0.0131193	0.181894
EBF4	EBF4	388.836	447.848	397.421	244.136	239.699	244.167	20	2692874	2760109	+	1962.11	447.848	315.638	327.018	protein_coding	ENSG00000088881	ensembl_havana	21	1	1.28134e-05	0.00184578	0.589473	-0.762502	-1.69643	242.659	411.653	-2.15099	-1.33793	1.28006e-05	0.00184393
ECHDC1	ECHDC1	929.577	1028.09	922.912	1127.37	1080.02	1564.38	6	127288712	127343610	-	6652.35	1564.38	1090.32	1108.73	protein_coding	ENSG00000093144	ensembl_havana	19	1	0.0471105	0.343642	1.30948	0.388989	1.30948	1257.65	960.42	1.00345	1.70883	0.0471078	0.343622
ECI1	ECI1	362.086	373.205	463.438	627.158	561.134	475.484	16	2239402	2252301	-	2862.51	627.158	467.794	477.084	protein_coding	ENSG00000167969	ensembl_havana	13	1	0.018286	0.216169	1.38949	0.474559	1.38949	554.237	398.877	1.05732	1.82603	0.0182841	0.216146
EDC4	EDC4	1072.49	996.54	970.041	881.172	896.317	734.318	16	67873052	67884500	+	5550.88	1072.49	918.715	925.147	protein_coding	ENSG00000038358	ensembl_havana	15	1	0.0770177	0.428807	0.825977	-0.275826	-1.21069	836.959	1013.3	-1.49646	1.02094	0.0770146	0.42879
EDEM1	EDEM1	2533.23	2474.57	2432.82	1958.42	2073.72	1925.07	3	5187646	5219959	+	13397.8	2533.23	2218.52	2232.97	protein_coding	ENSG00000134109	ensembl_havana	11	1	0.00569992	0.112744	0.800563	-0.320914	-1.24912	1985.75	2480.44	-1.46249	-1.06688	0.00569888	0.112723
EDIL3	EDIL3	2338.77	1858.03	2343.59	4751.45	2704.61	4117.29	5	83940554	84384881	-	18113.7	4751.45	2852.62	3018.96	protein_coding	ENSG00000164176	ensembl_havana	13	1	0.000443774	0.0244785	1.76964	0.823456	1.76964	3857.49	2179.82	1.28698	2.43331	0.000443579	0.0244677
EDN1	EDN1	572.268	645.113	773.717	532.76	456.438	484.051	6	12290361	12297195	+	3464.35	773.717	568.116	577.391	protein_coding	ENSG00000078401	ensembl_havana	7	1	0.020246	0.22897	0.740544	-0.433343	-1.35036	490.886	662.872	-1.74008	-1.04792	0.020244	0.228948
EEA1	EEA1	1526.69	1444.84	1462.93	1056.84	1086.45	916.696	12	92770637	92929332	-	7494.44	1526.69	1226.04	1249.07	protein_coding	ENSG00000102189	ensembl_havana	17	1	0.000140893	0.0109857	0.68983	-0.535687	-1.44963	1019.71	1478.2	-1.75503	-1.19738	0.000140809	0.0109792
EEF1A1	EEF1A1	110569	135766	112409	192975	180463	141291	6	73515750	73523798	-	873473	192975	142300	145579	protein_coding	ENSG00000156508	ensembl_havana	18	1	0.00296561	0.0758587	1.4348	0.520853	1.4348	171576	119582	1.13075	1.82061	0.00296491	0.0758407
EEF1A1P13	EEF1A1P13	104.188	118.618	100.66	176.68	199.276	259.759	5	14651941	14653330	-	959.181	259.759	149.971	159.864	processed_pseudogene	ENSG00000250182	havana	3	1	0.00020834	0.0143958	1.96452	0.974174	1.96452	212.199	108.016	1.37493	2.80693	0.000208228	0.014388
EEF1A1P4	EEF1A1P4	33.4381	29.3233	14.5237	49.9123	34.294	91.6699	12	19456244	19457649	-	253.161	91.6699	36.1574	42.1935	processed_pseudogene	ENSG00000245205	havana	3	1	0.0348715	0.298935	2.25912	1.17576	2.25912	58.7192	25.992	1.05961	4.81655	0.034869	0.298914
EEF1A1P5	EEF1A1P5	55825.4	66474.7	56570.5	89494.3	82622.9	84727	9	133019486	133020875	+	435715	89494.3	71312.6	72619.1	processed_pseudogene	ENSG00000196205	havana	8	1	7.04322e-05	0.0064366	1.4359	0.521956	1.4359	85614.5	59624.2	1.20129	1.71632	7.03828e-05	0.00643208
EEF1A1P6	EEF1A1P6	2473.04	2884.52	2853.6	4324.79	3682.96	4489	7	22510616	22512000	-	20707.9	4489	3366.42	3451.32	processed_pseudogene	ENSG00000233476	havana	3	1	4.95504e-05	0.00498377	1.52205	0.606014	1.52205	4165.55	2736.81	1.24255	1.86441	4.95128e-05	0.00497999
EEF1A1P7	EEF1A1P7	5.13564	4.6092	5.69887	11.2517	8.96089	19.5151	19	35382172	35384053	+	55.1714	19.5151	8.01662	9.19523	processed_pseudogene	ENSG00000268222	havana	1	1	0.101931	0.48454	2.59338	1.37483	2.59338	13.2834	5.12204	-1.20806	8.12494	0.101928	0.484525
EEF1A1P9	EEF1A1P9	53.0002	42.0962	43.7744	64.1346	72.7851	140.457	4	105484698	105486081	+	416.248	140.457	63.2513	69.3746	processed_pseudogene	ENSG00000249264	havana	1	1	0.0186723	0.219042	2.0008	1.00058	2.0008	92.6811	46.3219	1.12255	3.56617	0.0186704	0.219019
EEF1A2	EEF1A2	94.582	70.1982	85.8218	439.445	196.535	136.22	20	63488014	63499186	-	1022.8	439.445	137.315	170.467	protein_coding	ENSG00000101210	ensembl_havana	12	1	0.000218691	0.0148844	3.0788	1.62237	3.0788	257.035	83.4857	1.69601	5.58899	0.000218575	0.0148765
EEF1B2	EEF1B2	2132.93	2613.2	2223.44	4305.74	3572.87	2795.81	2	206159585	206162929	+	17644	4305.74	2847.46	2940.66	protein_coding	ENSG00000114942	ensembl_havana	14	1	0.00213449	0.0645096	1.53115	0.614618	1.53115	3557.58	2323.47	1.16663	2.00958	0.00213392	0.0644924
EEF1B2P3	EEF1B2P3	1050.53	1225.8	1192.01	2076.53	1714.68	1445.74	X	24788392	24789070	-	8705.29	2076.53	1411.3	1450.88	processed_pseudogene	ENSG00000232472	ensembl_havana	1	1	0.00135354	0.0484366	1.50956	0.594126	1.50956	1745.08	1156.02	1.17343	1.94197	0.00135311	0.0484215
EEF1D	EEF1D	4423.85	4614.54	4358.14	6607.97	5367.8	5449.09	8	143579697	143599542	-	30821.4	6607.97	5080.46	5136.9	protein_coding	ENSG00000104529	ensembl_havana	17	1	0.00732934	0.129675	1.30049	0.379052	1.30049	5807.67	4465.76	1.07326	1.57582	0.00732814	0.129653
EEF1G	EEF1G	8345.69	9214.96	8059.15	14361.4	12229.9	8356.49	11	62559596	62574087	-	60567.6	14361.4	9843.47	10094.6	protein_coding	ENSG00000254772	ensembl_havana	10	1	0.037875	0.311465	1.36399	0.447831	1.36399	11648.7	8540.19	1.01753	1.82841	0.0378724	0.311444
EEF2	EEF2	13217.7	13426.6	12137.9	16768.5	15196.6	23162.7	19	3976056	3985464	-	93909.8	23162.7	15277.4	15651.6	protein_coding	ENSG00000167658	ensembl_havana	16	1	0.0079377	0.137258	1.42147	0.507382	1.42147	18376.3	12927.7	1.09641	1.8429	0.00793644	0.137237
EFCAB11	EFCAB11	150.949	190.157	163.722	219.18	238.78	244.168	14	89794669	89954778	-	1206.96	244.168	197.89	201.159	protein_coding	ENSG00000140025	ensembl_havana	16	1	0.0264525	0.261722	1.39014	0.475228	1.39014	234.18	168.458	1.03927	1.85946	0.0264502	0.2617
EFCAB13	EFCAB13	43.8284	33.5773	42.6735	17.3506	24.7931	26.5586	17	47323290	47441313	+	188.782	43.8284	29.9205	31.4636	protein_coding	ENSG00000178852	ensembl_havana	16	1	0.0835476	0.443251	0.575854	-0.796225	-1.73655	23.0034	39.9465	-3.24462	1.07594	0.0835445	0.443234
EFNA5	EFNA5	592.331	533.149	599.434	457.89	532.665	434.36	5	107376889	107670938	-	3149.83	599.434	521.239	524.972	protein_coding	ENSG00000184349	ensembl_havana	13	1	0.106357	0.494628	0.826564	-0.274802	-1.20983	474.981	574.646	-1.52451	1.04156	0.106354	0.494613
EFR3B	EFR3B	195.851	210.595	268.028	75.9535	58.7767	45.4066	2	25042076	25159136	+	854.611	268.028	114.394	142.435	protein_coding	ENSG00000084710	ensembl_havana	14	1	2.31777e-10	4.92468e-07	0.266334	-1.90869	-3.75469	59.7689	224.413	-5.65224	-2.49418	2.30797e-10	4.90387e-07
EGFL8	EGFL8	215.388	217.292	377.095	177.563	139.224	153.017	6	32164595	32168282	+	1279.58	377.095	201.413	213.263	protein_coding	ENSG00000241404	ensembl_havana	7	1	0.00904387	0.146551	0.581498	-0.782153	-1.7197	156.482	269.101	-2.58365	-1.14464	0.00904252	0.14653
EGLN1	EGLN1	1818.04	1610.65	1713.79	1429.01	1541.94	1184.04	1	231363751	231422288	-	9297.49	1818.04	1535.23	1549.58	protein_coding	ENSG00000135766	ensembl_havana	9	1	0.0555592	0.37018	0.80786	-0.307822	-1.23784	1384.75	1714.09	-1.54003	1.00508	0.0555563	0.370161
EGLN3	EGLN3	906.652	566.916	838.413	281.028	737.465	269.012	14	33924227	34462775	-	3599.49	906.652	537.172	599.914	protein_coding	ENSG00000129521	ensembl_havana	15	1	0.0324656	0.288173	0.557123	-0.843931	-1.79493	429.27	770.512	-3.06812	-1.05008	0.0324632	0.288151
EGR2	EGR2	25.7951	23.9918	39.6101	7.59535	17.4493	17.9913	10	62811996	62919901	-	132.433	39.6101	19.7	22.0722	protein_coding	ENSG00000122877	ensembl_havana	16	1	0.0855755	0.447987	0.488049	-1.0349	-2.04897	14.4563	29.6205	-4.64194	1.10567	0.0855724	0.44797
EHMT2-AS1	EHMT2-AS1	5.73224	3.55434	17.1644	2.1701	2.75516	0	6	31877808	31884205	+	31.3762	17.1644	0	5.22937	lncRNA	ENSG00000237080	havana	3	1	0.0796583	0.433596	0.185797	-2.4282	-5.3822	1.61741	8.7052	-35.3487	1.22026	0.0796552	0.433579
EID2	EID2	344.89	397.198	439.672	341.791	317.761	215.895	19	39538707	39540162	-	2057.21	439.672	334.955	342.868	protein_coding	ENSG00000176396	ensembl_havana	11	1	0.0750435	0.424195	0.740536	-0.433359	-1.35037	291.47	393.594	-1.87967	1.0308	0.0750405	0.424178
EID2B	EID2B	62.0992	59.5352	77.8998	37.9768	38.5722	51.4037	19	39530987	39532853	-	327.487	77.8998	52.8077	54.5812	protein_coding	ENSG00000176401	ensembl_havana	6	1	0.0822643	0.439173	0.64522	-0.632136	-1.54986	42.7551	66.2643	-2.54053	1.05765	0.0822612	0.439157
EIF1AX	EIF1AX	2075.43	2196.87	2258.55	1640.13	1942.68	1726.49	X	20124525	20141839	-	11840.2	2258.55	1959.74	1973.36	protein_coding	ENSG00000173674	ensembl_havana	11	1	0.0285744	0.271023	0.813199	-0.29832	-1.22971	1770.03	2176.63	-1.47979	-1.0219	0.0285721	0.271001
EIF1B-AS1	EIF1B-AS1	7.64298	6.2201	3.96101	1.08505	10.1022	108.804	3	40061110	40309699	-	137.816	108.804	7.79645	22.9693	lncRNA	ENSG00000280739	havana	3	1	0.0246291	0.251288	6.7074	2.74575	6.7074	40.0864	5.97644	1.27539	35.2749	0.0246269	0.251265
EIF2A	EIF2A	1091.03	1152.49	950.641	1321.59	1416.16	1351.06	3	150546678	150586017	+	7282.97	1416.16	1202.44	1213.83	protein_coding	ENSG00000144895	ensembl_havana	12	1	0.0140257	0.188029	1.27901	0.355032	1.27901	1363.04	1065.69	1.05101	1.55648	0.014024	0.188006
EIF2B3	EIF2B3	360.175	398.086	361.772	585.925	491.336	394.952	1	44850522	44986723	-	2592.25	585.925	425.058	432.041	protein_coding	ENSG00000070785	ensembl_havana	17	1	0.0612258	0.385534	1.3126	0.392425	1.3126	490.265	373.507	-1.01289	1.74511	0.0612229	0.385516
EIF2S3	EIF2S3	2670.58	2712.88	2862.17	2077.04	2226.24	1935.11	X	24054946	24078811	+	14484	2862.17	2388.23	2414	protein_coding	ENSG00000130741	ensembl_havana	11	1	0.00155897	0.0536426	0.756653	-0.402297	-1.32161	2079.35	2748.09	-1.57084	-1.11192	0.00155851	0.0536266
EIF2S3B	EIF2S3B	455.402	487.799	502.049	300.305	336.972	413.18	12	10505602	10523136	+	2495.71	502.049	408.739	415.951	protein_coding	ENSG00000180574	havana	3	1	0.0185846	0.218538	0.727972	-0.458045	-1.37368	350.572	481.573	-1.78937	-1.05456	0.0185827	0.218516
EIF3E	EIF3E	4947	5547.44	4780.9	7025.33	6987.25	9579.23	8	108201216	108435334	-	38867.2	9579.23	6286	6477.86	protein_coding	ENSG00000104408	ensembl_havana	10	1	0.000427009	0.0239296	1.5444	0.62705	1.5444	7864.4	5092.19	1.21267	1.96688	0.000426819	0.023919
EIF3EP1	EIF3EP1	932.304	944.642	839.503	1039.96	1173.51	1606.9	6	73291962	73293278	+	6536.82	1606.9	1063.87	1089.47	processed_pseudogene	ENSG00000234882	havana	1	1	0.0169489	0.209307	1.40646	0.492065	1.40646	1273.97	905.8	1.06302	1.86085	0.0169471	0.209285
EIF3F	EIF3F	2846.29	2683.68	2577.61	3984.18	3679.71	3903.89	11	7970251	8001863	+	19675.4	3984.18	3225.87	3279.23	protein_coding	ENSG00000175390	ensembl_havana	14	1	1.80544e-05	0.00230743	1.42645	0.512433	1.42645	3855.77	2703.05	1.21268	1.67791	1.80375e-05	0.00230527
EIF3FP3	EIF3FP3	960.863	883.979	809.047	1331.5	1084.88	1553.4	2	58251440	58252526	+	6623.67	1553.4	1074.85	1103.94	processed_pseudogene	ENSG00000233426	havana	3	1	0.00206988	0.0637388	1.49531	0.580441	1.49531	1323.39	885.028	1.15756	1.9316	0.00206932	0.0637215
EIF3H	EIF3H	3877.85	4291.91	3538.52	4855.59	4497.37	6217.18	8	116642130	116766926	-	27278.4	6217.18	4471.74	4546.4	protein_coding	ENSG00000147677	ensembl_havana	11	1	0.020531	0.230506	1.32972	0.411127	1.32972	5190.38	3903.35	1.04484	1.69229	0.020529	0.230484
EIF3I	EIF3I	2629.2	3003.44	2900.75	4228.42	3790.23	3081.65	1	32221928	32231605	+	19633.7	4228.42	3227.97	3272.28	protein_coding	ENSG00000084623	ensembl_havana	11	1	0.0238345	0.247951	1.30064	0.379217	1.30064	3699.54	2844.41	1.03549	1.63367	0.0238324	0.247929
EIF3K	EIF3K	1205.68	1491.93	1358.62	2045.3	1791.78	1692.9	19	38619082	38636956	+	9586.21	2045.3	1573.23	1597.7	protein_coding	ENSG00000178982	ensembl_havana	10	1	0.00500032	0.10378	1.36292	0.446696	1.36292	1842.9	1352.17	1.09794	1.69184	0.00499935	0.10376
EIF3L	EIF3L	3040.39	3266.36	2759.05	4241.27	3617.21	3739.1	22	37848868	37889408	+	20663.4	4241.27	3409.82	3443.9	protein_coding	ENSG00000100129	ensembl_havana	18	1	0.0126183	0.177115	1.27877	0.354759	1.27877	3865.44	3022.78	1.0541	1.55134	0.0126167	0.177093
EIF3M	EIF3M	2653	2343.16	2431.78	3121.39	2908.23	3481.11	11	32583798	32606265	+	16938.7	3481.11	2795.93	2823.11	protein_coding	ENSG00000149100	ensembl_havana	13	1	0.0107381	0.161814	1.28045	0.356649	1.28045	3170.45	2476.05	1.05896	1.54827	0.0107366	0.161792
EIF4A2	EIF4A2	9025.2	10336.2	9751.71	11396.3	11847.4	14577.9	3	186783205	186789898	+	66934.8	14577.9	11019.6	11155.8	protein_coding	ENSG00000156976	ensembl_havana	17	1	0.0138146	0.187258	1.29917	0.377592	1.29917	12607.7	9704.43	1.05483	1.60012	0.013813	0.187235
EIF4B	EIF4B	5597.3	5683.28	5059.25	6184.42	6450.69	9063.3	12	53006158	53042210	+	38038.2	9063.3	6225.05	6339.71	protein_coding	ENSG00000063046	ensembl_havana	17	1	0.0301821	0.27852	1.32795	0.4092	1.32795	7233.32	5446.98	1.02755	1.71616	0.0301797	0.278499
EIF5A2	EIF5A2	271.326	280.793	274.63	315.749	351.742	350.402	3	170888418	170908645	-	1844.64	351.742	305.581	307.44	protein_coding	ENSG00000163577	ensembl_havana	8	1	0.0826766	0.440545	1.2318	0.300766	1.2318	339.51	275.621	-1.02735	1.55883	0.0826735	0.440528
ELK1	ELK1	1412.04	1517.7	1679.46	1072.02	1214.11	946.689	X	47635521	47650605	-	7842.02	1679.46	1281.78	1307	protein_coding	ENSG00000126767	ensembl_havana	18	1	0.00187413	0.0596564	0.701581	-0.511318	-1.42535	1077.49	1535.81	-1.78213	-1.14	0.00187361	0.0596396
ELL2	ELL2	2436.1	2303.14	2186.39	1755.91	2229.8	1601.91	5	95885098	95961852	-	12513.3	2436.1	2062.33	2085.54	protein_coding	ENSG00000118985	ensembl_havana	16	1	0.0742197	0.422925	0.806708	-0.309882	-1.23961	1862.56	2308.84	-1.56927	1.02124	0.0742167	0.422908
ELOB	ELOB	1179.89	1544.34	1081.35	2446.82	2254.64	1599.52	16	2771414	2777281	-	10106.6	2446.82	1609.55	1684.43	protein_coding	ENSG00000103363	ensembl_havana	15	1	0.00133105	0.0481388	1.65462	0.726496	1.65462	2099.94	1269.14	1.21656	2.2504	0.00133063	0.0481236
ELOVL1	ELOVL1	2087.49	2110.41	2458.47	3400.59	2836	2219.77	1	43363398	43368075	-	15112.7	3400.59	2478.59	2518.79	protein_coding	ENSG00000066322	ensembl_havana	15	1	0.0788329	0.431424	1.27045	0.34534	1.27045	2818.22	2218.28	-1.02796	1.65917	0.0788299	0.431407
ELP1	ELP1	1206.64	1129.39	1239.8	941.824	763.18	1011.8	9	108867517	108934125	-	6292.62	1239.8	1034.93	1048.77	protein_coding	ENSG00000070061	ensembl_havana	15	1	0.0180165	0.215059	0.759969	-0.395987	-1.31584	905.61	1191.64	-1.65189	-1.04816	0.0180146	0.215036
ELP4	ELP4	331.514	358.1	377.616	394.958	382.967	839.557	11	31509755	31790325	+	2684.71	839.557	422.558	447.452	protein_coding	ENSG00000109911	ensembl_havana	19	1	0.0649559	0.39688	1.51697	0.601189	1.51697	539.507	355.649	-1.02617	2.36141	0.0649529	0.396862
EMB	EMB	544.526	709.897	534.736	337.45	817.308	4818.54	5	50396192	50443249	-	7762.46	4818.54	806.264	1293.74	protein_coding	ENSG00000170571	ensembl_havana	12	1	0.0938347	0.467926	3.33866	1.73927	3.33866	1991.2	596.406	-1.22713	13.6784	0.0938315	0.46791
EMBP1	EMBP1	7.68017	24.9623	13.2034	13.0206	34.9543	81.0519	1	121519112	121575703	+	174.873	81.0519	21.2996	29.1454	transcribed_unprocessed_pseudogene	ENSG00000231752	havana	6	1	0.05593	0.371329	2.81108	1.49112	2.81108	43.1453	15.3483	-1.02651	8.11163	0.0559271	0.37131
EMC10	EMC10	1249.63	1726.06	1712.47	2503.1	2280.02	2924.02	19	50476400	50490872	+	12395.3	2924.02	1987.51	2065.88	protein_coding	ENSG00000161671	ensembl_havana	17	1	0.000188611	0.0134143	1.64442	0.717583	1.64442	2569.2	1562.37	1.26656	2.13502	0.000188506	0.0134068
EMC2	EMC2	617.171	698.429	538.697	733.494	715.422	961.252	8	108443601	108489197	+	4264.46	961.252	699.484	710.744	protein_coding	ENSG00000104412	ensembl_havana	8	1	0.0594769	0.38093	1.29895	0.377345	1.29895	803.699	618.73	-1.01051	1.705	0.059474	0.380912
EMC3	EMC3	685.959	804.896	767.114	948.33	954.202	930.405	3	9962537	10011117	-	5090.91	954.202	842.096	848.484	protein_coding	ENSG00000125037	ensembl_havana	12	1	0.0221572	0.237921	1.25467	0.327309	1.25467	944.275	752.608	1.03303	1.52386	0.0221552	0.237899
EMC3-AS1	EMC3-AS1	59.4716	53.5007	60.9495	27.7952	44.9068	29.6965	3	9986893	10006991	+	276.32	60.9495	43.931	46.0534	transcribed_unprocessed_pseudogene	ENSG00000180385	havana	8	1	0.0569559	0.374923	0.590544	-0.759884	-1.69335	34.1938	57.9023	-2.91248	1.0157	0.0569531	0.374904
EMC4	EMC4	930.132	1041	897.55	1171.72	1199.51	1039.91	15	34225013	34230157	+	6279.81	1199.51	1040.67	1046.64	protein_coding	ENSG00000128463	ensembl_havana	13	1	0.0952278	0.470467	1.18815	0.248712	1.18815	1136.83	956.807	-1.03058	1.45486	0.0952247	0.470451
EML1	EML1	159.547	176.828	184.847	35.8066	94.5937	77.9622	14	99737693	99942061	+	729.585	184.847	105.478	121.598	protein_coding	ENSG00000066629	ensembl_havana	18	1	0.000493042	0.0259465	0.401493	-1.31655	-2.4907	69.7262	173.667	-4.1614	-1.49075	0.000492831	0.0259354
EML6	EML6	334.381	358.989	347.248	241.966	239.699	157.638	2	54723499	54972026	+	1679.92	358.989	269.261	279.987	protein_coding	ENSG00000214595	ensembl_havana	12	1	0.00295842	0.075848	0.61342	-0.705053	-1.6302	212.789	346.889	-2.25013	-1.18107	0.00295772	0.07583
EMP1	EMP1	10559.8	10729	9320.23	14948.6	14952.8	25570.6	12	13196723	13219942	+	86081	25570.6	13493.3	14346.8	protein_coding	ENSG00000134531	ensembl_havana	10	1	0.000284087	0.0182913	1.81227	0.857801	1.81227	18491.1	10203.3	1.31456	2.49843	0.000283945	0.0182822
EMP3	EMP3	3737.45	4287.4	3516.04	5692.12	5128.39	5039.42	19	48321509	48330554	+	27400.8	5692.12	4498.59	4566.8	protein_coding	ENSG00000142227	ensembl_havana	11	1	0.00125572	0.0468086	1.37383	0.458199	1.37383	5286.28	3847.86	1.13274	1.66622	0.00125532	0.0467936
EN1	EN1	12.4198	0.888585	6.60168	1.08505	0	1.71346	2	118842171	118847649	-	22.7086	12.4198	0	3.78477	protein_coding	ENSG00000163064	ensembl_havana	7	1	0.0898139	0.459007	0.141408	-2.82207	-7.07174	0.936748	6.62444	-67.7728	1.3552	0.0898108	0.458991
ENDOD1	ENDOD1	2136.21	2100.62	1931.65	2635.59	2388.72	2898.31	11	95089846	95132646	+	14091.1	2898.31	2325.51	2348.52	protein_coding	ENSG00000149218	ensembl_havana	5	1	0.0103846	0.158312	1.2841	0.360762	1.2841	2641.02	2056.7	1.06058	1.55473	0.0103832	0.15829
ENO2	ENO2	3207.2	3485.88	3674.51	2544.44	2854.32	2120.42	12	6913745	6923699	+	17886.8	3674.51	2929.94	2981.13	protein_coding	ENSG00000111674	ensembl_havana	9	1	0.00460872	0.0986613	0.725279	-0.463391	-1.37878	2506.18	3455.47	-1.72185	-1.10407	0.0046078	0.0986416
ENPP2	ENPP2	7.64298	5.33151	1.32034	4.3402	0	74.5353	8	119557086	119673454	-	93.1704	74.5353	0	15.5284	protein_coding	ENSG00000136960	ensembl_havana	12	1	0.102214	0.485318	5.47032	2.45163	5.47032	26.3466	4.81628	-1.40318	41.9893	0.102211	0.485303
ENPP4	ENPP4	723.217	774.846	611.316	1103.5	1260.94	1080.33	6	46129989	46146689	+	5554.15	1260.94	895.287	925.692	protein_coding	ENSG00000001561	ensembl_havana	7	1	2.32128e-05	0.00286454	1.63109	0.705841	1.63109	1148.31	704.009	1.30037	2.04594	2.31921e-05	0.00286199
ENPP5	ENPP5	0	5.33151	2.64067	0	25.7148	68.5382	6	46159185	46170981	-	102.225	68.5382	0	17.0375	protein_coding	ENSG00000112796	ensembl_havana	10	1	0.0185543	0.218538	11.7844	3.5588	11.7844	31.4719	2.67065	1.51171	91.8635	0.0185523	0.218516
ENTPD1-AS1	ENTPD1-AS1	221.313	267.283	195.424	149.158	215.927	72.0355	10	95732976	96090251	-	1121.14	267.283	173.012	186.857	lncRNA	ENSG00000226688	havana	7	1	0.0998589	0.480986	0.638055	-0.648247	-1.56726	145.602	228.197	-2.67653	1.08965	0.0998557	0.480971
ENTPD4	ENTPD4	1543.88	1473.28	1561.96	1077.46	1169.1	1285.95	8	23385783	23457696	-	8111.63	1561.96	1338.67	1351.94	protein_coding	ENSG00000197217	ensembl_havana	13	1	0.00723553	0.128248	0.771879	-0.373554	-1.29554	1177.97	1526.11	-1.56499	-1.07248	0.00723433	0.128226
EPB41L1	EPB41L1	369.729	470.951	529.455	106.335	405.926	173.059	20	36091504	36232800	+	2055.46	529.455	297.167	342.576	protein_coding	ENSG00000088367	ensembl_havana	23	1	0.021877	0.236255	0.500727	-0.997903	-1.9971	228.619	456.574	-3.60764	-1.10554	0.0218749	0.236232
EPB41L5	EPB41L5	175.789	167.942	167.683	71.6133	101.941	148.214	2	120013077	120179120	+	833.182	175.789	132.275	138.864	protein_coding	ENSG00000115109	ensembl_havana	14	1	0.0392778	0.317321	0.631105	-0.664047	-1.58452	107.599	170.493	-2.45455	-1.02288	0.0392752	0.3173
EPDR1	EPDR1	992.633	1053.86	983.65	749.768	976.246	542.309	7	37683843	37951937	+	5298.47	1053.86	861.372	883.078	protein_coding	ENSG00000086289	ensembl_havana	12	1	0.074744	0.42359	0.748375	-0.418167	-1.33623	755.973	1010.15	-1.83794	1.02936	0.074741	0.423573
EPHA4	EPHA4	1869.64	1614	1680.79	1001.5	1189.31	996.375	2	221418027	221574203	-	8351.61	1869.64	1348.73	1391.94	protein_coding	ENSG00000116106	ensembl_havana	12	1	5.26639e-06	0.000877629	0.617174	-0.69625	-1.62029	1062.5	1721.56	-1.99432	-1.3164	5.2602e-06	0.000876596
EPHA6	EPHA6	0	0.888585	0	0	3.67354	11.9942	3	96814581	97752461	+	16.5563	11.9942	0	2.75939	protein_coding	ENSG00000080224	ensembl_havana	17	1	0.102935	0.487244	14.1052	3.81816	14.1052	5.2494	0.37216	-1.70611	339.445	0.102932	0.487229
EPHB3	EPHB3	2.86612	5.33151	9.24235	21.701	13.7758	78.819	3	184561785	184582409	+	131.736	78.819	12.2187	21.956	protein_coding	ENSG00000182580	ensembl_havana	3	1	0.00178602	0.0579366	6.70034	2.74423	6.70034	38.1946	5.70039	2.03127	22.1017	0.00178551	0.05792
EPHX1	EPHX1	279.924	309.228	295.755	308.154	347.151	865.294	1	225810092	225845564	+	2405.51	865.294	365.132	400.918	protein_coding	ENSG00000143819	ensembl_havana	12	1	0.04129	0.323925	1.7195	0.781989	1.7195	507.212	294.976	1.02165	2.89402	0.0412874	0.323904
EPM2AIP1	EPM2AIP1	656.341	729.528	646.965	538.185	459.193	553.446	3	36985043	36993132	-	3583.66	729.528	590.44	597.276	protein_coding	ENSG00000178567	havana	8	1	0.0175438	0.212372	0.762413	-0.391355	-1.31162	516.901	677.981	-1.64069	-1.04856	0.017542	0.212349
EPS15L1	EPS15L1	1077.66	1088.52	1105.12	910.358	997.365	518.319	19	16355239	16472086	-	5697.34	1105.12	920.94	949.556	protein_coding	ENSG00000127527	ensembl_havana	14	1	0.0906933	0.459586	0.741359	-0.431755	-1.34887	808.375	1090.4	-1.90787	1.04859	0.0906902	0.45957
EPSTI1	EPSTI1	64.01	54.2037	66.0168	19.5309	27.5516	46.2633	13	42886388	42992272	-	277.576	66.0168	42.2675	46.2627	protein_coding	ENSG00000133106	ensembl_havana	14	1	0.0327713	0.289598	0.510543	-0.969897	-1.9587	31.3106	61.3281	-3.6309	-1.05663	0.0327689	0.289577
ERCC6	ERCC6	380.238	311.005	367.053	211.585	283.781	304.995	10	49454470	49539539	-	1858.66	380.238	304.359	309.776	protein_coding	ENSG00000225830	ensembl_havana	14	1	0.0743132	0.423175	0.757839	-0.400037	-1.31954	267.18	352.555	-1.78926	1.02761	0.0743102	0.423157
ERCC6L	ERCC6L	710.8	538.48	451.553	502.379	392.15	221.892	X	72204657	72239028	-	2817.25	710.8	442.971	469.542	protein_coding	ENSG00000186871	ensembl_havana	7	1	0.059386	0.380765	0.655388	-0.60958	-1.52581	371.774	567.258	-2.36738	1.01687	0.0593831	0.380746
ERG28	ERG28	578.001	504.716	437.031	736.749	697.973	510.61	14	75649791	75660877	-	3465.08	736.749	567.705	577.513	protein_coding	ENSG00000133935	ensembl_havana	7	1	0.102642	0.486263	1.27812	0.354026	1.27812	648.089	507.063	-1.05052	1.71612	0.102639	0.486248
ERGIC3	ERGIC3	2678.86	3435.26	2944.37	4468.23	3963.76	3361.81	20	35542021	35557635	+	20852.3	4468.23	3424.68	3475.38	protein_coding	ENSG00000125991	ensembl_havana	19	1	0.0300423	0.277603	1.30168	0.38038	1.30168	3930.79	3019.77	1.0258	1.65177	0.03004	0.277582
ERI3	ERI3	859.834	860.153	777.677	1211.99	1103.91	1010.94	1	44221070	44355261	-	5824.5	1211.99	959.013	970.75	protein_coding	ENSG00000117419	ensembl_havana	16	1	0.00597174	0.115303	1.33061	0.412089	1.33061	1108.51	833.083	1.08547	1.63112	0.00597067	0.115282
ERLIN2	ERLIN2	721.307	844.156	719.583	899.507	961.55	1011.8	8	37736601	37758423	+	5157.9	1011.8	852.345	859.65	protein_coding	ENSG00000147475	ensembl_havana	17	1	0.0309135	0.281143	1.25672	0.329659	1.25672	957.889	762.216	1.02121	1.54654	0.0309112	0.281122
ERMAP	ERMAP	170.057	159.057	163.722	283.198	283.781	328.126	1	42817122	42844992	+	1387.94	328.126	221.086	231.323	protein_coding	ENSG00000164010	ensembl_havana	15	1	1.33819e-05	0.00191147	1.81748	0.861939	1.81748	298.551	164.267	1.38889	2.37833	1.33686e-05	0.00190958
ERN1	ERN1	370.685	419.412	343.287	297.304	331.537	173.916	17	64039142	64130820	-	1936.14	419.412	311.575	322.69	protein_coding	ENSG00000178607	ensembl_havana	16	1	0.0746089	0.42359	0.707212	-0.499786	-1.414	267.351	378.035	-2.06941	1.03501	0.0746059	0.423573
ERO1A	ERO1A	8030.91	8571.24	7376.66	6642.67	7529.8	5306.55	14	52639915	52695901	-	43457.8	8571.24	7160.35	7242.97	protein_coding	ENSG00000197930	ensembl_havana	13	1	0.0839272	0.443803	0.812263	-0.299981	-1.23113	6492.78	7993.44	-1.55851	1.02826	0.0839241	0.443787
ERP29	ERP29	1648.39	1981.81	1855.08	2993.64	2687.87	1939.15	12	112013348	112023450	+	13105.9	2993.64	2134.44	2184.32	protein_coding	ENSG00000089248	ensembl_havana	7	1	0.018745	0.219592	1.38901	0.474062	1.38901	2539.71	1828.43	1.05612	1.82683	0.0187431	0.219569
ERVK13-1	ERVK13-1	192.985	151.059	220.496	87.889	72.5525	104.521	16	2660348	2682380	-	829.503	220.496	127.441	138.251	lncRNA	ENSG00000260565	havana	7	1	0.000151428	0.0115671	0.470804	-1.0868	-2.12403	88.3874	187.737	-3.13618	-1.43853	0.00015134	0.0115603
ESCO2	ESCO2	171.012	199.932	159.761	311.409	185.514	234.743	8	27771949	27812641	+	1262.37	311.409	204.934	210.395	protein_coding	ENSG00000171320	ensembl_havana	15	1	0.0899366	0.459228	1.37482	0.459247	1.37482	243.579	177.171	-1.05085	1.98626	0.0899334	0.459212
ESD	ESD	623.859	781.068	583.589	947.251	912.875	881.579	13	46771256	46797421	-	4730.22	947.251	775.062	788.37	protein_coding	ENSG00000139684	ensembl_havana	15	1	0.00809629	0.138312	1.37685	0.461373	1.37685	913.774	663.669	1.08665	1.74456	0.00809502	0.138291
ESR2	ESR2	57.3224	36.432	68.9516	18.4458	42.2457	18.848	14	64084232	64338113	-	242.246	68.9516	35.8275	40.3743	protein_coding	ENSG00000140009	ensembl_havana	18	1	0.0530626	0.363232	0.491653	-1.02429	-2.03395	26.5632	54.0283	-4.17595	1.00942	0.0530598	0.363213
ESYT2	ESYT2	7655.18	7530.37	7446.61	9691.83	8177.22	11273.7	7	158730995	158830254	-	51774.9	11273.7	8523.82	8629.15	protein_coding	ENSG00000117868	ensembl_havana	17	1	0.0217362	0.235783	1.28768	0.364774	1.28768	9714.43	7544.13	1.0376	1.59804	0.0217341	0.23576
ETFB	ETFB	455.062	586.399	556.196	853.819	855.942	760.775	19	51345169	51366389	-	4068.19	855.942	659.821	678.032	protein_coding	ENSG00000105379	ensembl_havana	10	1	0.000281777	0.0182116	1.54643	0.62894	1.54643	823.342	532.415	1.22222	1.95664	0.000281636	0.0182025
ETFRF1	ETFRF1	105.091	76.4183	64.6965	84.6339	117.553	332.411	12	25195216	25209646	+	780.804	332.411	109.442	130.134	protein_coding	ENSG00000205707	ensembl_havana	11	1	0.0295177	0.275209	2.17115	1.11846	2.17115	178.45	82.1917	1.08018	4.36397	0.0295153	0.275187
ETNK1	ETNK1	789.138	906.355	859.539	920.123	906.447	1734.88	12	22625075	22690666	+	6116.48	1734.88	980.683	1019.41	protein_coding	ENSG00000139163	ensembl_havana	16	1	0.0826617	0.440545	1.39436	0.479599	1.39436	1187.55	851.683	-1.04395	2.02967	0.0826586	0.440528
ETS1	ETS1	5863.13	5706.54	6193.74	4022.26	4937.24	4799.41	11	128458761	128587559	-	31522.3	6193.74	5199.16	5253.72	protein_coding	ENSG00000134954	ensembl_havana	14	1	0.0083274	0.139733	0.774718	-0.368257	-1.29079	4586.86	5920.68	-1.56028	-1.06785	0.00832611	0.139711
EVC2	EVC2	3.82149	7.99727	7.92202	27.1263	15.6126	32.5557	4	5542772	5709549	-	95.0353	32.5557	12.225	15.8392	protein_coding	ENSG00000173040	ensembl_havana	13	1	0.00679451	0.123852	3.83963	1.94097	3.83963	25.1039	6.53809	1.44947	10.1712	0.00679335	0.123831
EVL	EVL	187.253	166.165	224.457	59.6778	123.064	95.0577	14	99971449	100144237	+	855.675	224.457	130.218	142.612	protein_coding	ENSG00000196405	ensembl_havana	13	1	0.00146386	0.0507811	0.482765	-1.05061	-2.0714	92.8467	192.323	-3.244	-1.32266	0.00146342	0.0507656
EWSR1	EWSR1	3029.42	3190.31	3451.48	2569.54	2428.83	2898.64	22	29268009	29300526	+	17568.2	3451.48	2906.97	2928.04	protein_coding	ENSG00000182944	ensembl_havana	17	1	0.0367726	0.308367	0.816781	-0.291978	-1.22432	2632.58	3223.11	-1.48043	-1.01251	0.03677	0.308346
EXOC4	EXOC4	688.824	843.264	612.635	1031.88	972.573	1009.23	7	133253073	134066590	+	5158.4	1031.88	843.598	859.734	protein_coding	ENSG00000131558	ensembl_havana	15	1	0.00535015	0.108121	1.40321	0.488733	1.40321	1004.5	715.855	1.10558	1.78097	0.00534915	0.1081
EXT2	EXT2	2162.98	2085.51	2397.72	2459.81	2570.59	3252.96	11	44095673	44251963	+	14929.6	3252.96	2461.57	2488.26	protein_coding	ENSG00000151348	ensembl_havana	15	1	0.0565771	0.373765	1.24686	0.318304	1.24686	2761.61	2214.84	-1.0062	1.56431	0.0565743	0.373746
EXTL2	EXTL2	500.194	553.587	524.173	641.262	589.607	698.231	1	100872372	100895180	-	3507.05	698.231	580.63	584.509	protein_coding	ENSG00000162694	ensembl_havana	14	1	0.0670324	0.401769	1.22253	0.289875	1.22253	643.142	526.073	-1.0142	1.51581	0.0670295	0.401751
EZH2	EZH2	739.458	727.751	719.583	1067.69	762.261	896.992	7	148807383	148884322	-	4913.73	1067.69	810.126	818.956	protein_coding	ENSG00000106462	ensembl_havana	11	1	0.0762017	0.426921	1.2463	0.317652	1.2463	908.547	728.995	-1.02347	1.58972	0.0761987	0.426904
F2RL1	F2RL1	3066.75	2810.59	3094.87	5055.25	3801.2	3400.35	5	76818933	76835316	+	21229	5055.25	3469.11	3538.17	protein_coding	ENSG00000164251	ensembl_havana	5	1	0.0158148	0.20212	1.36596	0.449919	1.36596	4084.93	2990.52	1.06032	1.75971	0.015813	0.202097
F3	F3	2061.7	1256.46	2091.43	1564.64	1396.86	1017.79	1	94529173	94541760	-	9388.88	2091.43	1514.17	1564.81	protein_coding	ENSG00000117525	ensembl_havana	14	1	0.0851597	0.447194	0.735653	-0.442902	-1.35934	1326.12	1802.65	-1.92807	1.04344	0.0851566	0.447177
FAAP20	FAAP20	628.813	638.744	630.059	881.625	773.394	670.137	1	2184461	2212721	-	4222.77	881.625	697.986	703.796	protein_coding	ENSG00000162585	ensembl_havana	17	1	0.0829265	0.441482	1.22443	0.292106	1.22443	774.538	632.572	-1.02674	1.53931	0.0829234	0.441466
FAF1	FAF1	839.772	874.368	772.397	1096.99	1020.32	873.007	1	50437028	50960268	-	5476.85	1096.99	906.307	912.809	protein_coding	ENSG00000185104	ensembl_havana	20	1	0.10008	0.481231	1.20135	0.264651	1.20135	996.332	829.347	-1.03582	1.49493	0.100076	0.481216
FAH	FAH	289.478	369.651	352.53	457.891	458.275	450.639	15	80152490	80186947	+	2378.46	458.275	390.889	396.411	protein_coding	ENSG00000103876	ensembl_havana	13	1	0.0159009	0.202916	1.35152	0.434586	1.35152	455.58	337.086	1.05799	1.72649	0.0158991	0.202893
FAM102A	FAM102A	2075.06	2231.22	2516.54	2120.18	1923.11	1429.89	9	127940582	127980990	-	12296	2516.54	2019.96	2049.33	protein_coding	ENSG00000167106	ensembl_havana	12	1	0.100993	0.483161	0.802145	-0.318065	-1.24666	1823.9	2273.78	-1.62245	1.04394	0.100989	0.483146
FAM107B	FAM107B	910.469	848.597	760.515	668.391	637.361	675.103	10	14518557	14774898	-	4500.44	910.469	743.55	750.073	protein_coding	ENSG00000065809	ensembl_havana	13	1	0.0203881	0.229545	0.785499	-0.348318	-1.27308	660.272	840.576	-1.56124	-1.0381	0.0203861	0.229522
FAM114A2	FAM114A2	263.683	313.671	250.864	407.979	412.355	492.62	5	153990148	154038937	-	2141.17	492.62	346.127	356.862	protein_coding	ENSG00000055147	ensembl_havana	19	1	0.000755628	0.0332834	1.58333	0.662965	1.58333	437.885	276.559	1.21187	2.06866	0.000755343	0.0332709
FAM118A	FAM118A	110.823	122.625	134.674	152.992	142.35	208.185	22	45308968	45341956	+	871.649	208.185	142.286	145.275	protein_coding	ENSG00000100376	ensembl_havana	12	1	0.0906043	0.459586	1.37181	0.456085	1.37181	168.036	122.492	-1.05129	1.9784	0.0906011	0.45957
FAM118B	FAM118B	331.515	375.872	353.85	492.613	438.989	421.51	11	126211724	126262985	+	2414.35	492.613	398.738	402.391	protein_coding	ENSG00000197798	ensembl_havana	9	1	0.0419523	0.326813	1.27393	0.349281	1.27393	450.728	353.81	1.00885	1.60865	0.0419497	0.326792
FAM120C	FAM120C	377.373	444.292	448.914	328.77	304.904	258.732	X	54068324	54183282	-	2162.98	448.914	353.523	360.497	protein_coding	ENSG00000184083	ensembl_havana	12	1	0.00849951	0.141226	0.702007	-0.510443	-1.42449	297.159	423.299	-1.85397	-1.0945	0.0084982	0.141205
FAM122B	FAM122B	1164.6	1164.93	1119.64	984.137	811.855	629.695	X	134769566	134797233	-	5874.86	1164.93	956.174	979.144	protein_coding	ENSG00000156504	ensembl_havana	16	1	0.0110283	0.16372	0.702695	-0.509029	-1.42309	807.991	1149.85	-1.86805	-1.08412	0.0110268	0.163698
FAM124A	FAM124A	45.8579	49.7608	31.6881	65.103	50.5112	111.375	13	51222334	51284240	+	354.296	111.375	54.5961	59.0493	protein_coding	ENSG00000150510	ensembl_havana	17	1	0.0630745	0.392008	1.77653	0.829062	1.77653	75.7902	42.6619	-1.03182	3.25647	0.0630716	0.391989
FAM13A-AS1	FAM13A-AS1	42.5861	55.5027	44.9627	24.2523	24.1821	33.7879	4	88709298	88730104	+	225.274	55.5027	35.802	37.5456	lncRNA	ENSG00000248019	havana	3	1	0.061086	0.385534	0.575458	-0.797217	-1.73775	27.4888	47.7686	-3.09836	1.02603	0.061083	0.385516
FAM155A	FAM155A	42.9918	42.6521	36.9694	97.6545	90.9202	189.337	13	107163510	107867497	-	500.525	189.337	69.6294	83.4208	protein_coding	ENSG00000204442	havana	4	1	6.47993e-05	0.0060854	3.08002	1.62294	3.08002	126.178	40.9666	1.77358	5.34878	6.4753e-05	0.00608105
FAM156A	FAM156A	703.295	727.745	842.271	345.106	344.714	268.937	X	52926402	52995473	-	3232.07	842.271	489.709	538.678	protein_coding	ENSG00000268350	ensembl_havana	7	1	3.94718e-11	1.34188e-07	0.421682	-1.24577	-2.37146	319.294	757.192	-3.06385	-1.83553	3.92758e-11	1.33522e-07
FAM157C	FAM157C	50.7426	34.5315	64.46	5.99087	30.1831	30.9967	16	90102271	90178345	+	216.905	64.46	29.3027	36.1508	lncRNA	ENSG00000260528	havana	5	1	0.0749653	0.424046	0.45306	-1.14223	-2.20722	22.546	49.7639	-5.27606	1.08298	0.0749622	0.424029
FAM167B	FAM167B	21.0182	23.1032	25.0864	11.9356	10.1022	5.14037	1	32247222	32248857	+	96.386	25.0864	14.0064	16.0643	protein_coding	ENSG00000183615	ensembl_havana	6	1	0.0365633	0.307426	0.389899	-1.35883	-2.56477	8.97998	23.0316	-6.20204	-1.06063	0.0365607	0.307405
FAM171B	FAM171B	140.44	152.837	138.635	133.461	157.962	501.186	2	186694060	186765960	+	1224.52	501.186	177.657	204.087	protein_coding	ENSG00000144369	ensembl_havana	13	1	0.0666728	0.400861	1.83663	0.877058	1.83663	264.485	144.006	-1.04269	3.51718	0.0666699	0.400843
FAM172A	FAM172A	509.214	583.801	512.29	643.434	575.828	730.788	5	93617725	94111700	-	3555.36	730.788	587.776	592.559	protein_coding	ENSG00000113391	ensembl_havana	19	1	0.108685	0.499875	1.21429	0.280114	1.21429	650.161	535.425	-1.04401	1.5394	0.108682	0.49986
FAM193B	FAM193B	970.662	961.449	1102.48	689.007	576.746	578.291	5	177519789	177554564	-	4878.64	1102.48	786.357	813.106	protein_coding	ENSG00000146067	ensembl_havana	16	1	8.22245e-06	0.00128225	0.607652	-0.718682	-1.64568	614.265	1010.88	-2.04847	-1.32209	8.21352e-06	0.00128086
FAM200A	FAM200A	139.484	183.049	151.839	179.033	179.085	316.989	7	99546300	99558537	-	1149.48	316.989	184.467	191.58	protein_coding	ENSG00000221909	ensembl_havana	3	1	0.103108	0.487383	1.42391	0.509862	1.42391	225.321	158.24	-1.07417	2.17792	0.103105	0.487369
FAM20C	FAM20C	1062.37	1158.72	911.032	1201.15	1317.88	1590.95	7	192571	260773	+	7242.11	1590.95	1188.92	1207.02	protein_coding	ENSG00000177706	ensembl_havana	9	1	0.0314954	0.282959	1.31168	0.391416	1.31168	1370.42	1044.78	1.02436	1.67959	0.031493	0.282937
FAM214B	FAM214B	953.459	1038.76	1309.77	724.814	979.002	684.524	9	35104112	35116342	-	5690.33	1309.77	925.91	948.388	protein_coding	ENSG00000005238	ensembl_havana	19	1	0.0310057	0.281143	0.723835	-0.466267	-1.38153	796.174	1099.94	-1.8531	-1.02996	0.0310034	0.281122
FAM219A	FAM219A	684.048	694.875	879.344	468.742	567.561	229.603	9	34398184	34458571	-	3524.17	879.344	542.641	587.362	protein_coding	ENSG00000164970	ensembl_havana	15	1	0.00966527	0.151559	0.560512	-0.835182	-1.78408	421.763	752.459	-2.76597	-1.15075	0.00966388	0.151537
FAM219B	FAM219B	686.411	639.794	742.176	629.517	571.839	497.617	15	74899992	74906884	-	3767.35	742.176	622.852	627.892	protein_coding	ENSG00000178761	ensembl_havana	15	1	0.0970152	0.475546	0.821422	-0.283804	-1.2174	565.914	688.944	-1.5358	1.03626	0.0970121	0.47553
FAM222A	FAM222A	104.136	101.299	105.627	64.018	89.0834	66.8248	12	109713825	109770496	+	530.987	105.627	86.6966	88.4979	protein_coding	ENSG00000139438	ensembl_havana	6	1	0.0905749	0.459586	0.708086	-0.498003	-1.41226	73.3874	103.642	-2.10636	1.0561	0.0905718	0.45957
FAM229A	FAM229A	164.825	157.047	218.119	141.057	82.195	100.257	1	32361270	32364279	-	863.5	218.119	136.831	143.917	protein_coding	ENSG00000225828	ensembl_havana	1	1	0.0160988	0.203972	0.599049	-0.739254	-1.66931	107.571	179.57	-2.53378	-1.09978	0.016097	0.203949
FAM229B	FAM229B	16.2413	49.7608	23.766	56.4226	56.0215	62.5411	6	112087591	112102791	+	264.753	62.5411	39.4978	44.1256	protein_coding	ENSG00000203778	ensembl_havana	8	1	0.0625706	0.389973	1.93703	0.953848	1.93703	58.3468	30.1217	-1.03531	3.88458	0.0625677	0.389955
FAM234A	FAM234A	902.586	1113.41	1192.26	1307.48	1345.43	1205.41	16	234521	272184	+	7066.57	1345.43	1168.13	1177.76	protein_coding	ENSG00000167930	ensembl_havana	17	1	0.10861	0.499875	1.20324	0.26693	1.20324	1285.99	1068.77	-1.04185	1.50838	0.108607	0.49986
FAM24B	FAM24B	76.4298	91.5243	99.0252	22.786	67.9606	28.272	10	122849078	122879642	-	385.998	99.0252	55.8433	64.333	protein_coding	ENSG00000213185	ensembl_havana	7	1	0.0162601	0.204722	0.447311	-1.16065	-2.23558	39.7719	88.9133	-4.30883	-1.1599	0.0162582	0.2047
FAM3C	FAM3C	2504.03	2700.87	2454.23	2894.25	3438.82	3400.4	7	121348878	121396365	-	17392.6	3438.82	2872.47	2898.77	protein_coding	ENSG00000196937	ensembl_havana	11	1	0.0123594	0.17487	1.27082	0.345756	1.27082	3245	2553.47	1.05327	1.5333	0.0123579	0.174848
FAM3C2	FAM3C2	744.236	952.104	781.919	983.722	1125.56	1099.98	X	23075758	23076768	+	5687.52	1125.56	936.548	947.92	processed_pseudogene	ENSG00000174028	havana	6	1	0.0265421	0.262151	1.29451	0.37241	1.29451	1070	826.568	1.03051	1.62616	0.0265398	0.262129
FAM50B	FAM50B	81.2067	40.8749	51.4931	105.25	87.2467	87.3863	6	3849373	3851321	+	453.457	105.25	71.8128	75.5762	protein_coding	ENSG00000145945	ensembl_havana	7	1	0.0662123	0.399636	1.60932	0.686452	1.60932	93.2077	57.9174	-1.03237	2.67374	0.0662093	0.399618
FAM72A	FAM72A	99.3944	116.932	130.162	86.4205	83.7044	71.2504	1	206186179	206204415	-	587.864	130.162	95.9376	97.9774	protein_coding	ENSG00000196550	ensembl_havana	10	1	0.064241	0.394783	0.697279	-0.520191	-1.43415	80.3477	115.23	-2.10111	1.02156	0.0642381	0.394765
FAM83A	FAM83A	2333.98	2075.74	2640.67	1308.57	1554.82	1356.2	8	123178960	123210080	+	11270	2640.67	1811.19	1878.33	protein_coding	ENSG00000147689	ensembl_havana	16	1	4.21306e-06	0.000771806	0.598804	-0.739844	-1.67	1406.7	2349.18	-2.07775	-1.34226	4.2079e-06	0.000770862
FAM83A-AS1	FAM83A-AS1	10.5091	12.4402	25.0864	3.25515	7.34709	2.57018	8	123196536	123202744	-	61.2081	25.0864	7.65738	10.2014	lncRNA	ENSG00000204949	havana	9	1	0.0373906	0.31079	0.277266	-1.85066	-3.60664	4.39849	15.8638	-12.0693	-1.07776	0.0373881	0.310769
FAM83E	FAM83E	20.0628	15.1059	19.805	3.25515	12.8574	1.71346	19	48600810	48614855	-	72.7998	20.0628	8.68932	12.1333	protein_coding	ENSG00000105523	ensembl_havana	3	1	0.0742559	0.42299	0.325504	-1.61925	-3.07216	5.9565	18.2993	-10.5355	1.11627	0.0742529	0.422973
FAM83H	FAM83H	70.6976	71.9754	67.3371	168.183	46.8377	482.338	8	143723933	143738235	-	907.368	482.338	104.495	151.228	protein_coding	ENSG00000180921	ensembl_havana	7	1	0.00693108	0.125391	3.32161	1.73188	3.32161	232.581	70.0207	1.38969	7.93925	0.00692992	0.125369
FAM86DP	FAM86DP	149.994	138.619	89.7829	181.203	185.514	239.027	3	75421552	75435111	-	984.14	239.027	157.041	164.023	transcribed_unprocessed_pseudogene	ENSG00000244026	havana	6	1	0.020122	0.228479	1.59471	0.673291	1.59471	202.076	126.717	1.07586	2.36378	0.02012	0.228457
FANCB	FANCB	97.448	109.296	134.674	69.4432	68.8789	63.3979	X	14835961	14873070	-	543.138	134.674	87.0446	90.523	protein_coding	ENSG00000181544	ensembl_havana	15	1	0.00962	0.151128	0.592428	-0.755287	-1.68797	67.1931	113.42	-2.50884	-1.13568	0.00961861	0.151106
FAP	FAP	339.014	273.644	467.319	214.784	226.712	126.715	2	162170684	162245152	-	1648.19	467.319	253.836	274.698	protein_coding	ENSG00000078098	ensembl_havana	14	1	0.00327062	0.079762	0.526448	-0.925638	-1.89952	189.207	359.402	-2.91295	-1.23867	0.00326988	0.0797437
FARSB	FARSB	473.865	542.926	471.36	651.03	607.971	540.595	2	222566899	222656093	-	3287.75	651.03	544.107	547.958	protein_coding	ENSG00000116120	ensembl_havana	11	1	0.106942	0.495585	1.20766	0.272219	1.20766	599.532	496.44	-1.04156	1.51906	0.106939	0.49557
FAT3	FAT3	10.5091	12.4402	13.2034	17.3608	53.2664	328.983	11	92352096	92896471	+	435.763	328.983	28.404	72.6272	protein_coding	ENSG00000165323	ensembl_havana	15	1	6.0769e-05	0.00583588	11.0833	3.47031	11.0833	133.36	12.0326	3.42025	35.9153	6.0725e-05	0.00583165
FAU	FAU	1367.2	1938.37	1700.59	3165.78	2684.65	1826.65	11	65120630	65122178	-	12683.3	3165.78	2029.94	2113.88	protein_coding	ENSG00000149806	ensembl_havana	11	1	0.01084	0.162602	1.53323	0.61657	1.53323	2558.58	1668.75	1.10363	2.13004	0.0108386	0.16258
FAUP1	FAUP1	465.203	578.094	662.812	917.288	838.265	1012.54	18	74389884	74390298	-	4474.2	1012.54	719.541	745.701	processed_pseudogene	ENSG00000235297	havana	3	1	0.000302165	0.0188139	1.62465	0.70013	1.62465	922.786	567.99	1.24866	2.11386	0.000302017	0.0188047
FAXDC2	FAXDC2	251.263	231.032	377.615	81.3788	140.513	111.375	5	154818492	154859253	-	1193.18	377.615	174.172	198.863	protein_coding	ENSG00000170271	ensembl_havana	11	1	1.48664e-05	0.0020379	0.3891	-1.36179	-2.57004	111.288	286.015	-3.93969	-1.67655	1.4852e-05	0.00203592
FBLIM1	FBLIM1	361.131	361.655	588.869	181.203	315.925	333.267	1	15756607	15786595	+	2142.05	588.869	337.096	357.008	protein_coding	ENSG00000162458	ensembl_havana	13	1	0.0378403	0.311376	0.634761	-0.655715	-1.5754	277.12	436.574	-2.41933	-1.02585	0.0378377	0.311355
FBLN7	FBLN7	73.5637	89.7471	64.6965	117.185	111.125	133.65	2	112138385	112188219	+	589.967	133.65	95.1779	98.3279	protein_coding	ENSG00000144152	ensembl_havana	13	1	0.0212467	0.233906	1.58117	0.660989	1.58117	120.721	76.3494	1.07073	2.33493	0.0212446	0.233883
FBN1	FBN1	1567.78	905.471	1425.96	618.479	742.975	1023.79	15	48408313	48645722	-	6284.45	1567.78	991.888	1047.41	protein_coding	ENSG00000166147	ensembl_havana	14	1	0.0097187	0.15168	0.612146	-0.708053	-1.6336	795.417	1299.39	-2.36979	-1.12611	0.0097173	0.151658
FBRS	FBRS	1454.08	1423.52	1753.4	1412.74	1280.22	964.673	16	30658431	30670811	+	8288.63	1753.4	1360.17	1381.44	protein_coding	ENSG00000156860	ensembl_havana	16	1	0.0860133	0.448633	0.789845	-0.340358	-1.26607	1218.75	1543.02	-1.6574	1.03398	0.0860102	0.448617
FBXL16	FBXL16	16.2413	11.5516	25.0864	4.3402	9.18386	0	16	692498	705809	-	66.4034	25.0864	0	11.0672	protein_coding	ENSG00000127585	ensembl_havana	12	1	0.0700193	0.411347	0.255678	-1.9676	-3.91117	4.48722	17.5503	-17.1024	1.118	0.0700163	0.411329
FBXL19	FBXL19	777.672	694.874	876.703	647.775	682.361	415.513	16	30923055	30948784	+	4094.9	876.703	665.676	682.483	protein_coding	ENSG00000099364	ensembl_havana	16	1	0.0696299	0.410107	0.743084	-0.428402	-1.34574	581.581	782.658	-1.85471	1.02413	0.0696269	0.41009
FBXL19-AS1	FBXL19-AS1	80.2513	95.0786	116.19	30.3814	38.5722	42.8364	16	30919319	30923270	-	403.31	116.19	59.5296	67.2183	lncRNA	ENSG00000260852	havana	1	1	9.46676e-05	0.00808623	0.386031	-1.37321	-2.59046	37.3993	96.8816	-4.17744	-1.60637	9.46056e-05	0.00808093
FBXL3	FBXL3	1325.73	1197.76	1058.21	1303.94	1347.03	1830.93	13	76992598	77027196	-	8063.6	1830.93	1324.7	1343.93	protein_coding	ENSG00000005812	ensembl_havana	11	1	0.0995651	0.480644	1.25117	0.323274	1.25117	1494.39	1194.4	-1.04351	1.63352	0.0995619	0.480629
FBXL7	FBXL7	223.557	142.174	155.8	34.7216	73.4709	72.8219	5	15500180	15939796	+	702.545	223.557	98.6185	117.091	protein_coding	ENSG00000183580	ensembl_havana	10	1	5.95541e-05	0.0057517	0.348371	-1.5213	-2.8705	60.5916	173.928	-4.80321	-1.71547	5.95107e-05	0.00574752
FBXO11	FBXO11	1482.62	1256.94	1266.53	1017.32	1168.29	1063.44	2	47789316	47906499	-	7255.14	1482.62	1199.81	1209.19	protein_coding	ENSG00000138081	ensembl_havana	21	1	0.0447594	0.335311	0.81098	-0.302262	-1.23308	1083.2	1335.66	-1.51304	-1.00491	0.0447567	0.33529
FBXO2	FBXO2	8.59836	14.2174	14.5237	14.1056	22.0413	48.8335	1	11637018	11655786	-	122.32	48.8335	17.3158	20.3866	protein_coding	ENSG00000116661	ensembl_havana	11	1	0.0867429	0.450904	2.29427	1.19803	2.29427	28.4567	12.4034	-1.12729	5.93366	0.0867398	0.450888
FBXO22	FBXO22	275.148	401.324	376.484	488.272	380.189	487.478	15	75903876	75942512	+	2408.89	488.272	394.37	401.482	protein_coding	ENSG00000167196	ensembl_havana	14	1	0.108637	0.499875	1.28806	0.365201	1.28806	451.903	350.84	-1.05771	1.75485	0.108634	0.49986
FBXO28	FBXO28	2414.23	2193.91	2075.57	1465.9	1751.37	1300.51	1	224114111	224162048	+	11201.5	2414.23	1823.01	1866.92	protein_coding	ENSG00000143756	ensembl_havana	12	1	0.000809797	0.0346723	0.675793	-0.565347	-1.47974	1505.86	2228.29	-1.86111	-1.17653	0.000809497	0.0346595
FBXO36	FBXO36	40.1257	60.4238	69.9778	62.9329	101.941	195.334	2	229922302	230013120	+	530.735	195.334	77.256	88.4558	protein_coding	ENSG00000153832	ensembl_havana	12	1	0.0233214	0.24601	2.12238	1.08569	2.12238	120.314	56.6883	1.10766	4.0667	0.0233193	0.245987
FBXO41	FBXO41	728.95	714.424	755.229	613.053	595.117	308.422	2	73254682	73284432	-	3715.2	755.229	594.744	619.199	protein_coding	ENSG00000163013	ensembl_havana	11	1	0.0512779	0.359283	0.689378	-0.536632	-1.45058	505.169	732.789	-2.10854	1.00207	0.0512751	0.359264
FBXO43	FBXO43	194.896	200.82	174.284	152.992	87.2467	79.6757	8	100133351	100145818	-	889.915	200.82	139.135	148.319	protein_coding	ENSG00000156509	ensembl_havana	14	1	0.00900257	0.146516	0.558779	-0.83965	-1.78962	106.254	190.154	-2.76965	-1.15637	0.00900122	0.146494
FBXO44	FBXO44	49.6794	52.4265	71.2981	70.5283	57.8583	172.202	1	11654375	11663328	+	473.993	172.202	71.2189	78.9988	protein_coding	ENSG00000132879	ensembl_havana	14	1	0.100484	0.482629	1.74187	0.800634	1.74187	100.383	57.6296	-1.11322	3.37763	0.100481	0.482614
FBXO8	FBXO8	413.676	503.829	447.594	521.909	633.686	629.694	4	174236658	174283668	-	3150.39	633.686	518.487	525.065	protein_coding	ENSG00000164117	ensembl_havana	14	1	0.0309016	0.281143	1.30804	0.387407	1.30804	595.446	455.22	1.02499	1.66926	0.0308992	0.281122
FCRLB	FCRLB	10.5091	5.33151	3.96101	14.1057	23.878	24.8451	1	161721563	161728144	+	82.6304	24.8451	11.0869	13.7717	protein_coding	ENSG00000162746	ensembl_havana	14	1	0.0272072	0.265025	3.14006	1.65079	3.14006	21.0055	6.68952	1.13745	8.66853	0.027205	0.265003
FCSK	FCSK	81.2067	83.527	92.4235	67.2731	52.348	54.8306	16	70454595	70480275	+	431.609	92.4235	70.3333	71.9348	protein_coding	ENSG00000157353	ensembl_havana	17	1	0.0697379	0.410317	0.677949	-0.560751	-1.47504	58.0133	85.5717	-2.24506	1.03186	0.0697349	0.410299
FDX2	FDX2	290.559	283.054	330.849	499.147	462.483	293.894	19	10310045	10316016	-	2159.99	499.147	350.247	359.998	protein_coding	ENSG00000267673	ensembl_havana	6	1	0.0615247	0.386045	1.38821	0.473226	1.38821	418.139	301.207	-1.01596	1.95789	0.0615218	0.386027
FEM1C	FEM1C	1433.06	1314.22	1387.67	1062.26	1209.51	1132.59	5	115520908	115544776	-	7539.32	1433.06	1249.37	1256.55	protein_coding	ENSG00000145780	ensembl_havana	8	1	0.0371696	0.310014	0.823596	-0.27999	-1.21419	1135.06	1378.17	-1.45733	-1.01161	0.037167	0.309993
FER1L4	FER1L4	56.367	35.5434	55.4541	7.59535	26.6332	13.7076	20	35558737	35607563	-	195.301	56.367	25.9881	32.5501	transcribed_unitary_pseudogene	ENSG00000088340	ensembl_havana	17	1	0.00582254	0.113891	0.327884	-1.60874	-3.04986	16.0746	49.0252	-6.73717	-1.38065	0.00582149	0.113871
FERMT1	FERMT1	1603.1	2074.84	2164.02	914.698	1465.74	1275.68	20	6074845	6123545	-	9498.08	2164.02	1519.55	1583.01	protein_coding	ENSG00000101311	ensembl_havana	15	1	0.00265457	0.0729809	0.626151	-0.675417	-1.59706	1219.11	1946.99	-2.16733	-1.17684	0.00265392	0.0729629
FES	FES	35.3488	14.2174	31.6881	58.5927	57.8583	46.2633	15	90883695	90895777	+	243.969	58.5927	36.8346	40.6614	protein_coding	ENSG00000182511	ensembl_havana	12	1	0.0372768	0.310147	2.01371	1.00986	2.01371	54.191	26.9109	1.04212	3.89115	0.0372743	0.310126
FGD1	FGD1	522.174	460.368	515.725	210.435	283.416	213.692	X	54445454	54496235	-	2205.81	522.174	341.281	367.635	protein_coding	ENSG00000102302	ensembl_havana	8	1	1.21488e-07	6.0737e-05	0.472681	-1.08106	-2.11559	235.975	499.226	-2.79235	-1.60285	1.21234e-07	6.06097e-05
FGF14	FGF14	73.3437	28.9599	38.094	22.9496	16.6437	18.8798	13	101710804	102402458	-	198.871	73.3437	28.9072	33.1451	protein_coding	ENSG00000102466	ensembl_havana	15	1	0.0200433	0.228042	0.41492	-1.2691	-2.4101	19.4457	46.8662	-5.05841	-1.1483	0.0200413	0.22802
FGF5	FGF5	912.378	785.507	833.13	454.635	593.278	372.676	4	80266599	80336681	+	3951.6	912.378	625.723	658.601	protein_coding	ENSG00000138675	ensembl_havana	16	1	0.000121473	0.00973962	0.561197	-0.833421	-1.78191	473.465	843.67	-2.39238	-1.32721	0.000121398	0.00973361
FGF9	FGF9	23.8843	11.5516	6.60168	4.3402	1.83677	1.71346	13	21671073	21704499	+	49.928	23.8843	5.40308	8.32134	protein_coding	ENSG00000102678	ensembl_havana	7	1	0.0173065	0.211845	0.183088	-2.44939	-5.46184	2.58295	14.1077	-22.1061	-1.34948	0.0173046	0.211822
FGFRL1	FGFRL1	1805.68	2240.1	1985.81	2043.12	2042.49	5149.1	4	1009936	1026899	+	15266.3	5149.1	2359.6	2544.38	protein_coding	ENSG00000127418	ensembl_havana	15	1	0.0759047	0.426781	1.53121	0.614672	1.53121	3078.61	2010.57	-1.04541	2.45107	0.0759017	0.426764
FGGY	FGGY	14.3306	15.9945	13.2034	40.1469	29.3883	28.272	1	59296638	59810648	+	141.336	40.1469	21.5783	23.556	protein_coding	ENSG00000172456	ensembl_havana	18	1	0.026522	0.262106	2.23186	1.15824	2.23186	32.5141	14.5682	1.09807	4.5363	0.0265198	0.262083
FHL1	FHL1	1417.76	925.906	1085.32	620.648	602.462	209.899	X	136146702	136211360	+	4861.99	1417.76	694.095	810.332	protein_coding	ENSG00000022267	ensembl_havana	19	1	0.000823583	0.0349982	0.417664	-1.25959	-2.39427	477.395	1143.01	-3.99354	-1.43545	0.00082328	0.0349853
FHOD1	FHOD1	847.412	790.844	701.097	626.075	655.724	643.4	16	67229387	67247482	-	4264.55	847.412	706.261	710.759	protein_coding	ENSG00000135723	ensembl_havana	14	1	0.0638535	0.393954	0.822282	-0.282294	-1.21613	641.816	780.531	-1.49573	1.01134	0.0638505	0.393936
FIBP	FIBP	1426.37	1388.86	1341.46	2165.76	1884.53	1717.74	11	65883740	65888532	-	9924.73	2165.76	1628.2	1654.12	protein_coding	ENSG00000172500	ensembl_havana	13	1	0.00149482	0.0517493	1.38699	0.471954	1.38699	1922.1	1385.81	1.13342	1.69729	0.00149436	0.0517336
FIS1	FIS1	413.677	479.836	558.502	681.411	778.792	500.328	7	101239458	101252317	-	3412.55	778.792	555.662	568.758	protein_coding	ENSG00000214253	ensembl_havana	9	1	0.0602733	0.383287	1.35117	0.434211	1.35117	653.321	483.522	-1.01309	1.84956	0.0602704	0.383269
FJX1	FJX1	1000.28	1100.07	1161.9	985.225	909.202	727.362	11	35618460	35620866	+	5884.03	1161.9	970.008	980.672	protein_coding	ENSG00000179431	ensembl_havana	7	1	0.0751662	0.424195	0.803514	-0.315604	-1.24453	873.467	1087.06	-1.58362	1.02244	0.0751632	0.424178
FKBP14	FKBP14	525.784	605.425	658.351	365.546	490.021	342.492	7	30010587	30026703	-	2987.62	658.351	484.011	497.936	protein_coding	ENSG00000106080	ensembl_havana	11	1	0.00673421	0.123349	0.669979	-0.577811	-1.49258	399.405	596.145	-1.99411	-1.11719	0.00673306	0.123328
FKBP1C	FKBP1C	999.05	1067.22	1052.82	1107.41	1292.1	1379.56	6	63211446	63213025	+	6898.16	1379.56	1141.8	1149.69	protein_coding	ENSG00000198225	havana	5	1	0.0663725	0.400071	1.21217	0.27759	1.21217	1260.22	1039.64	-1.01309	1.48858	0.0663696	0.400053
FLCN	FLCN	909.517	1036.98	1154.91	661.88	799.853	739.356	17	17212212	17237189	-	5302.49	1154.91	867.551	883.749	protein_coding	ENSG00000154803	ensembl_havana	13	1	0.0037172	0.0862005	0.710432	-0.493232	-1.40759	733.962	1033.12	-1.7733	-1.11731	0.00371639	0.0861817
FLG-AS1	FLG-AS1	67.3334	54.6107	75.2591	32.5515	43.1641	39.4095	1	152168125	152445457	+	312.328	75.2591	49.838	52.0547	lncRNA	ENSG00000237975	havana	7	1	0.0369836	0.309104	0.587118	-0.768277	-1.70323	38.461	65.508	-2.80919	-1.03269	0.0369811	0.309083
FLI1	FLI1	14.3306	9.77444	29.0474	2.1701	0	0	11	128686535	128813268	+	55.3225	29.0474	0	9.22042	protein_coding	ENSG00000151702	ensembl_havana	17	1	0.000766114	0.0335629	0.0374015	-4.74076	-26.7369	0.658239	17.5993	-181.295	-3.94309	0.000765827	0.0335503
FLNB	FLNB	20689.5	16871.4	20089.7	16890.8	16763.2	8815.74	3	58008400	58172252	+	100120	20689.5	16113.5	16686.7	protein_coding	ENSG00000136068	ensembl_havana	15	1	0.0872033	0.452397	0.736662	-0.440925	-1.35747	14156.2	19216.7	-1.9268	1.04562	0.0872002	0.452381
FLNB-AS1	FLNB-AS1	97.4481	37.3206	99.0564	16.2758	20.4444	12.857	3	58162547	58170637	-	283.402	99.0564	33.9868	47.2337	lncRNA	ENSG00000244161	havana	1	1	2.88617e-05	0.00336021	0.212468	-2.23469	-4.7066	16.5086	77.6993	-9.7264	-2.27752	2.88371e-05	0.00335735
FLNC	FLNC	2546.93	1993.95	2857.21	1749.13	2102.13	1243.95	7	128830377	128859275	+	12493.3	2857.21	2012.15	2082.22	protein_coding	ENSG00000128591	ensembl_havana	15	1	0.0238353	0.247951	0.688811	-0.537821	-1.45178	1698.23	2465.45	-2.00595	-1.0507	0.0238331	0.247929
FMNL2	FMNL2	1617.46	1486.59	1443.12	1026.45	1300.43	1142.88	2	152335174	152649827	+	8016.93	1617.46	1320.16	1336.15	protein_coding	ENSG00000157827	ensembl_havana	20	1	0.0120952	0.172913	0.76313	-0.389999	-1.31039	1156.93	1516.03	-1.61845	-1.06097	0.0120936	0.172891
FMR1	FMR1	916.204	866.369	936.119	706.368	722.769	572.294	X	147911919	147951126	+	4720.12	936.119	775.258	786.687	protein_coding	ENSG00000102081	ensembl_havana	15	1	0.00694645	0.125457	0.736033	-0.442157	-1.35863	666.825	905.972	-1.69724	-1.08758	0.00694528	0.125436
FN1	FN1	59490.5	43395.4	51332.4	60905	55459.2	83203.2	2	215360440	215436074	-	353786	83203.2	57788.5	58964.3	protein_coding	ENSG00000115414	ensembl_havana	20	1	0.0733579	0.420552	1.29407	0.371913	1.29407	66522.8	51406	-1.02468	1.71595	0.0733549	0.420535
FNTA	FNTA	731.816	737.525	666.77	914.696	855.935	1130.88	8	43034194	43085789	+	5037.62	1130.88	826.447	839.604	protein_coding	ENSG00000168522	ensembl_havana	13	1	0.0111106	0.164368	1.35801	0.441492	1.35801	967.473	712.421	1.0723	1.71983	0.0111091	0.164345
FOXC1	FOXC1	884.675	912.577	1040.42	636.924	587.767	568.011	6	1609915	1613898	+	4630.38	1040.42	750.445	771.73	protein_coding	ENSG00000054598	havana	9	1	1.56802e-05	0.00208228	0.631977	-0.662056	-1.58234	597.296	945.123	-1.94867	-1.28487	1.56651e-05	0.00208028
FOXN3	FOXN3	1854.01	1349.15	1517.85	1005.84	1272.88	1016	14	89124871	89619150	-	8015.74	1854.01	1304.98	1335.96	protein_coding	ENSG00000053254	ensembl_havana	15	1	0.00671988	0.123349	0.69794	-0.518826	-1.43279	1098.36	1573.71	-1.85832	-1.1047	0.00671873	0.123328
FOXS1	FOXS1	46.8133	66.6439	81.8608	57.5077	24.7964	19.7047	20	31844303	31845605	-	297.327	81.8608	43.9186	49.5545	protein_coding	ENSG00000179772	ensembl_havana	8	1	0.0728834	0.418588	0.520014	-0.943379	-1.92303	33.7742	64.9486	-3.92933	1.06255	0.0728804	0.418571
FP236241.2	FP236241.2	55.4365	69.9043	187.21	67.0098	53.2412	25.2993	21	7669397	7681743	-	458.101	187.21	63.4874	76.3502	lncRNA	ENSG00000277991	ensembl_havana	4	1	0.0532287	0.363232	0.466474	-1.10013	-2.14374	48.3865	103.728	-4.64466	1.01067	0.0532259	0.363213
FP565260.3	FP565260.3	62.9721	200.331	134.012	35.9242	48.9666	100.731	21	5022493	5040667	+	582.937	200.331	81.7991	97.1562	protein_coding	ENSG00000277117	ensembl_havana	5	1	0.0393035	0.317378	0.468328	-1.09441	-2.13525	62.0483	132.489	-4.39287	-1.03789	0.0393009	0.317357
FPGT	FPGT	195.63	218.981	179.294	311.351	303.149	383.355	1	74198212	74234087	+	1591.76	383.355	255.458	265.293	protein_coding	ENSG00000254685	ensembl_havana	6	1	0.000426271	0.0239296	1.67781	0.746576	1.67781	332.833	198.374	1.25812	2.23749	0.000426081	0.023919
FREM2	FREM2	16.2413	8.88585	1.32034	1.08505	14.6942	191.05	13	38687077	38887132	+	233.277	191.05	9.13324	38.8795	protein_coding	ENSG00000150893	ensembl_havana	11	1	0.0213372	0.233911	7.75771	2.95563	7.75771	69.0232	8.89737	1.35578	44.3892	0.0213352	0.233889
FRG1	FRG1	303.809	327.888	290.474	361.322	445.416	439.501	4	189940870	189963203	+	2168.41	445.416	356.322	361.402	protein_coding	ENSG00000109536	ensembl_havana	12	1	0.0192493	0.222585	1.35114	0.43418	1.35114	415.758	307.709	1.05017	1.73838	0.0192474	0.222562
FRMD4B	FRMD4B	215.914	188.38	141.276	248.476	228.678	240.74	3	69168782	69542584	-	1263.47	248.476	206.97	210.578	protein_coding	ENSG00000114541	ensembl_havana	15	1	0.101559	0.483826	1.3109	0.390553	1.3109	239.249	182.508	-1.05479	1.8126	0.101555	0.483811
FSCN1	FSCN1	4056.42	4106.99	3861.94	3084.75	3752.48	1373.32	7	5592816	5606656	+	20235.9	4106.99	3174.17	3372.65	protein_coding	ENSG00000075618	ensembl_havana	18	1	0.0845227	0.445395	0.6827	-0.550675	-1.46477	2736.62	4008.52	-2.26004	1.05336	0.0845196	0.445378
FSIP2	FSIP2	54.4563	27.5461	43.5711	36.8917	71.6341	353.829	2	185738804	185833291	+	587.928	353.829	62.7612	97.988	protein_coding	ENSG00000188738	ensembl_havana	15	1	0.00920232	0.147691	3.68931	1.88335	3.68931	154.305	41.825	1.38133	9.85358	0.00920096	0.147669
FSTL1	FSTL1	4773.05	5035.59	5534.83	3569.84	4478.98	3556.3	3	120392293	120450994	-	26948.6	5534.83	4430.6	4491.43	protein_coding	ENSG00000163430	ensembl_havana	12	1	0.0102796	0.157134	0.756471	-0.402644	-1.32193	3868.52	5113.91	-1.63598	-1.06816	0.0102782	0.157112
FTH1	FTH1	12509.7	12528.4	12879.7	14770.5	17077.1	13124.8	11	61959718	61967635	-	82890.1	17077.1	13724.3	13815	protein_coding	ENSG00000167996	ensembl_havana	16	1	0.0895096	0.458831	1.18606	0.246175	1.18606	14990.7	12639.1	-1.02668	1.44426	0.0895065	0.458815
FTH1P10	FTH1P10	203.461	196.681	228.478	312.367	347.136	411.402	5	17353695	17354625	-	1699.52	411.402	272.324	283.254	transcribed_processed_pseudogene	ENSG00000223361	havana	5	1	0.000199275	0.013884	1.70826	0.772526	1.70826	357.304	209.163	1.28833	2.26505	0.000199166	0.0138764
FTH1P11	FTH1P11	102.18	109.421	98.986	127.749	151.144	206.402	8	81521682	81522233	-	795.882	206.402	128.061	132.647	processed_pseudogene	ENSG00000237264	havana	4	1	0.0244061	0.250201	1.56383	0.645085	1.56383	162.068	103.635	1.05946	2.30832	0.0244039	0.250179
FTH1P8	FTH1P8	56.9548	44.9165	59.3978	58.4985	84.4029	258.047	X	148052233	148052747	+	562.217	258.047	76.0591	93.7029	processed_pseudogene	ENSG00000219507	havana	4	1	0.0171139	0.210341	2.49392	1.31842	2.49392	133.884	53.6842	1.1766	5.28611	0.017112	0.210318
FTLP3	FTLP3	601.786	666.289	624.98	525	923.084	1361.81	20	4023917	4024445	+	4702.95	1361.81	740.88	783.824	processed_pseudogene	ENSG00000226608	havana	3	1	0.0720134	0.416072	1.48498	0.570443	1.48498	937.098	631.051	-1.036	2.28456	0.0720103	0.416054
FTSJ1	FTSJ1	1374.78	1528.37	1561.95	1104.58	1161.76	755.634	X	48476021	48486365	+	7487.08	1561.95	1212.81	1247.85	protein_coding	ENSG00000068438	ensembl_havana	15	1	0.00597611	0.115303	0.676646	-0.563526	-1.47788	1006.98	1488.19	-1.95245	-1.11865	0.00597504	0.115282
FUCA1	FUCA1	327.693	452.29	328.764	398.213	520.725	962.962	1	23845077	23868295	-	2990.65	962.962	462.044	498.441	protein_coding	ENSG00000179163	ensembl_havana	11	1	0.0239363	0.24841	1.69734	0.763277	1.69734	627.683	369.803	1.07236	2.68656	0.0239342	0.248387
FUT4	FUT4	381.171	309.226	421.187	288.28	285.081	258.547	11	94543840	94549899	+	1943.49	421.187	319.055	323.915	protein_coding	ENSG00000196371	ensembl_havana	3	1	0.0405416	0.320748	0.749463	-0.416072	-1.33429	277.183	369.843	-1.75835	-1.0125	0.040539	0.320727
FXN	FXN	182.806	188.834	183.674	252.15	196.267	289.438	9	69035563	69100179	+	1293.17	289.438	212.013	215.528	protein_coding	ENSG00000165060	ensembl_havana	14	1	0.079919	0.434014	1.32879	0.410115	1.32879	246.011	185.139	-1.03448	1.82657	0.0799159	0.433997
FYTTD1	FYTTD1	1475.1	1427.07	1402.2	1435.52	1793.6	2178.65	3	197737179	197787597	+	9712.15	2178.65	1596.49	1618.69	protein_coding	ENSG00000122068	ensembl_havana	13	1	0.0815183	0.437804	1.25668	0.329619	1.25668	1803.2	1434.89	-1.02901	1.62506	0.0815152	0.437787
FZD2	FZD2	1231.48	1136.5	1350.7	906.017	920.223	783.906	17	44557484	44561263	+	6328.83	1350.7	1035.88	1054.8	protein_coding	ENSG00000180340	havana	7	1	0.00097846	0.0398846	0.70212	-0.510211	-1.42426	869.799	1238.82	-1.75752	-1.15419	0.00097812	0.0398707
FZD4	FZD4	496.281	434.215	643.612	419.367	295.834	378.708	11	86945679	86955396	-	2668.02	643.612	432.182	444.669	protein_coding	ENSG00000174804	ensembl_havana	4	1	0.0264211	0.261711	0.695629	-0.523611	-1.43755	364.451	523.916	-1.98054	-1.04342	0.0264189	0.261689
FZD6	FZD6	2035.91	2169.07	1918.44	2409.9	1972.68	5128.43	8	103298433	103332867	+	15634.4	5128.43	2431.29	2605.74	protein_coding	ENSG00000164930	ensembl_havana	12	1	0.0526389	0.362043	1.5533	0.635335	1.5533	3170.67	2041.25	-1.00503	2.42488	0.0526361	0.362024
FZD7	FZD7	633.412	594.464	586.229	467.657	427.049	471.2	2	202034587	202038446	+	3180.01	633.412	524.302	530.002	protein_coding	ENSG00000155760	ensembl_havana	2	1	0.00684474	0.124302	0.752614	-0.410018	-1.3287	455.257	604.901	-1.63261	-1.08137	0.00684358	0.124281
FZD8	FZD8	2386.46	2415.14	3073.68	1225.02	1594.27	948.398	10	35638249	35642279	-	11643	3073.68	1789.27	1940.5	protein_coding	ENSG00000177283	ensembl_havana	7	1	3.12053e-06	0.000602758	0.478493	-1.06343	-2.0899	1255.8	2624.49	-2.84893	-1.53309	3.11651e-06	0.000601982
G6PC3	G6PC3	1141.68	1266.23	1172.45	1810.94	1687.07	1410.18	17	44070735	44076345	+	8488.56	1810.94	1392.87	1414.76	protein_coding	ENSG00000141349	ensembl_havana	8	1	0.00406107	0.0916374	1.37023	0.454422	1.37023	1635.57	1193.65	1.10532	1.69865	0.00406022	0.0916182
GAA	GAA	737.548	889.466	1033.82	1223.93	1095.63	1484.7	17	80101556	80119882	+	6465.1	1484.7	1051.33	1077.52	protein_coding	ENSG00000171298	ensembl_havana	13	1	0.0104359	0.15873	1.43102	0.517048	1.43102	1268.27	886.27	1.08776	1.88262	0.0104345	0.158708
GABARAP	GABARAP	3167.16	3741.08	3379.96	4534.52	4849.65	4141.73	17	7240008	7242450	-	23814.1	4849.65	3923.44	3969.02	protein_coding	ENSG00000170296	ensembl_havana	10	1	0.00478945	0.100756	1.31456	0.394577	1.31456	4508.49	3429.67	1.08705	1.58967	0.0047885	0.100736
GABARAPL2	GABARAPL2	591.377	780.178	624.519	781.237	911.961	907.277	16	75566375	75577882	+	4596.55	911.961	755.702	766.091	protein_coding	ENSG00000034713	ensembl_havana	8	1	0.0355269	0.302245	1.30228	0.381043	1.30228	867.099	665.83	1.01804	1.66588	0.0355244	0.302224
GABBR1	GABBR1	810.155	748.19	756.552	292.977	332.456	449.783	6	29555629	29633977	-	3390.11	810.155	521.393	565.019	protein_coding	ENSG00000204681	ensembl_havana	11	1	1.54839e-07	7.51987e-05	0.465055	-1.10453	-2.15028	358.876	771.686	-2.86217	-1.61546	1.54525e-07	7.50461e-05
GABPB1-AS1	GABPB1-AS1	918.59	742.62	983.508	444.673	380.29	586.541	15	50354959	50372203	+	4056.22	983.508	636.581	676.037	lncRNA	ENSG00000244879	havana	8	1	5.91035e-05	0.00574136	0.534251	-0.90441	-1.87178	470.722	881.087	-2.54161	-1.37848	5.90604e-05	0.00573718
GABRR2	GABRR2	55.4116	48.8722	36.9694	32.5515	28.47	21.4182	6	89254464	89315300	-	223.693	55.4116	35.4575	37.2821	protein_coding	ENSG00000111886	ensembl_havana	11	1	0.0722066	0.416905	0.579033	-0.788281	-1.72702	27.3781	47.2825	-3.13325	1.05052	0.0722036	0.416888
GADD45B	GADD45B	706.976	680.656	664.13	513.229	633.688	457.493	19	2476122	2478260	+	3656.17	706.976	601.903	609.362	protein_coding	ENSG00000099860	ensembl_havana	9	1	0.0542993	0.368014	0.781764	-0.355195	-1.27916	534.772	684.059	-1.6437	1.00455	0.0542964	0.367995
GAK	GAK	791.05	772.181	830.492	592.438	653.89	729.934	4	849276	932374	-	4369.99	830.492	723.516	728.331	protein_coding	ENSG00000178950	ensembl_havana	17	1	0.078802	0.431424	0.826486	-0.274938	-1.20994	659.194	797.587	-1.49642	1.02217	0.0787989	0.431407
GALE	GALE	655.386	788.176	726.185	989.567	1024	884.141	1	23795599	23800782	-	5067.46	1024	833.82	844.576	protein_coding	ENSG00000117308	ensembl_havana	15	1	0.00808733	0.138298	1.3351	0.416952	1.3351	965.727	723.335	1.07802	1.65349	0.00808606	0.138276
GALNT10	GALNT10	7156.48	8226.51	7564.25	8475.04	8877.06	10943.8	5	154190730	154420985	+	51243.1	10943.8	8460.12	8540.52	protein_coding	ENSG00000164574	ensembl_havana	16	1	0.0525576	0.362043	1.23312	0.302316	1.23312	9432.46	7649.25	-1.00232	1.52412	0.0525548	0.362024
GALNT16	GALNT16	11.4645	8.88585	15.844	0	5.51032	4.28364	14	69259277	69357034	+	45.9883	15.844	0	7.66472	protein_coding	ENSG00000100626	ensembl_havana	17	1	0.0905741	0.459586	0.277025	-1.85191	-3.60979	3.32641	12.0076	-15.9628	1.22503	0.090571	0.45957
GALNT3	GALNT3	527.365	570.474	609.995	780.15	624.503	956.111	2	165747588	165794660	-	4068.6	956.111	663.716	678.1	protein_coding	ENSG00000115339	ensembl_havana	14	1	0.0243911	0.250201	1.38326	0.46807	1.38326	787.081	569.005	1.04283	1.83482	0.0243889	0.250179
GAMT	GAMT	369.73	350.103	344.608	627.158	605.217	556.018	19	1397026	1401571	-	2852.83	627.158	459.512	475.472	protein_coding	ENSG00000130005	ensembl_havana	13	1	2.11186e-06	0.000472335	1.67864	0.747289	1.67864	595.883	354.98	1.35516	2.07933	2.10896e-06	0.000471686
GAPDH	GAPDH	49266.1	52317.2	46762	62848.8	60685.1	75331.9	12	6534512	6538375	+	347211	75331.9	57091.8	57868.5	protein_coding	ENSG00000111640	ensembl_havana	15	1	0.00301283	0.0766647	1.34055	0.422829	1.34055	66289	49449	1.10455	1.62698	0.00301211	0.0766466
GAPDHP1	GAPDHP1	153.896	150.153	152.068	210.206	219.448	281.197	X	39787132	39788137	-	1166.97	281.197	189.001	194.494	processed_pseudogene	ENSG00000228232	havana	1	1	0.00489148	0.102144	1.5604	0.641919	1.5604	237.23	152.031	1.1446	2.12726	0.00489052	0.102124
GAPDHP60	GAPDHP60	2.95738	6.22052	3.96101	4.3403	15.6126	22.2749	4	87207092	87208087	+	55.3667	22.2749	6.9219	9.22778	processed_pseudogene	ENSG00000248180	havana	1	1	0.0831702	0.441928	3.21294	1.68389	3.21294	14.1596	4.40705	-1.16554	12.0318	0.0831671	0.441911
GAPDHP65	GAPDHP65	26.4157	30.3612	29.0486	38.4827	52.5273	95.9398	X	46439709	46440715	-	272.775	95.9398	40.6592	45.4625	processed_pseudogene	ENSG00000235587	havana	2	1	0.0204066	0.229545	2.18545	1.12793	2.18545	62.5179	28.6064	1.12861	4.23192	0.0204045	0.229522
GARS1-DT	GARS1-DT	409.087	447.916	454.415	278.765	262.233	333.646	7	30516309	30595287	-	2186.06	454.415	355.86	364.344	lncRNA	ENSG00000196295	havana	12	1	0.00187314	0.0596564	0.667683	-0.582765	-1.49772	291.758	436.971	-1.93196	-1.16108	0.00187261	0.0596396
GAS2L1	GAS2L1	1771.26	1793.16	1732.28	2657.29	2414.44	3022.54	22	29306582	29312786	+	13391	3022.54	2177.83	2231.83	protein_coding	ENSG00000185340	ensembl_havana	15	1	1.94334e-05	0.00242889	1.52815	0.611783	1.52815	2698.32	1765.74	1.25794	1.85639	1.94155e-05	0.00242665
GAS7	GAS7	78.3406	63.0896	69.9778	55.3376	46.8377	25.7018	17	9910609	10198552	-	339.285	78.3406	53.3434	56.5475	protein_coding	ENSG00000007237	ensembl_havana	18	1	0.0768568	0.428707	0.602231	-0.73161	-1.66049	42.4309	70.4561	-2.91218	1.0562	0.0768538	0.42869
GASK1A	GASK1A	39.1703	37.3206	13.2034	20.6159	12.8574	3.42691	3	42979267	43060212	+	126.594	39.1703	16.1179	21.0991	protein_coding	ENSG00000144649	ensembl_havana	9	1	0.0989836	0.479486	0.405376	-1.30267	-2.46684	12.1885	30.067	-7.21119	1.18502	0.0989805	0.479471
GATA6	GATA6	245.271	238.09	353.555	610.67	461.552	535.318	18	22169392	22202529	+	2444.46	610.67	382.162	407.409	protein_coding	ENSG00000141448	ensembl_havana	10	1	5.78161e-05	0.00568068	1.92608	0.945665	1.92608	535.647	278.103	1.39939	2.651	5.77737e-05	0.00567652
GATAD2A	GATAD2A	2991.3	2831.95	3055.27	2685.49	2622.91	2358.58	19	19385826	19508932	+	16545.5	3055.27	2747.31	2757.58	protein_coding	ENSG00000167491	ensembl_havana	17	1	0.093385	0.467145	0.863537	-0.21167	-1.15803	2555.27	2959.08	-1.37453	1.02498	0.0933818	0.467129
GBE1	GBE1	2390.34	2315.67	2103.31	1801.16	2096.66	1768.26	3	81489703	81761646	-	12475.4	2390.34	2065.91	2079.23	protein_coding	ENSG00000114480	ensembl_havana	13	1	0.0643896	0.394954	0.831912	-0.265496	-1.20205	1888.78	2270.4	-1.4609	1.01106	0.0643866	0.394936
GCA	GCA	179.61	227.478	170.323	365.661	298.475	248.451	2	162318840	162371596	+	1490	365.661	239.494	248.333	protein_coding	ENSG00000115271	ensembl_havana	11	1	0.00818481	0.138848	1.57547	0.655778	1.57547	303.849	192.863	1.12484	2.20661	0.00818353	0.138826
GCH1	GCH1	85.9836	102.187	93.7439	72.6984	71.6341	35.9826	14	54842008	54902827	-	462.23	102.187	73.2401	77.0383	protein_coding	ENSG00000131979	ensembl_havana	19	1	0.0862347	0.449171	0.637447	-0.649624	-1.56876	59.9163	93.9942	-2.62402	1.06624	0.0862316	0.449155
GCHFR	GCHFR	46.6369	31.8663	52.4272	101.117	93.4491	88.2796	15	40764068	40767709	+	413.776	101.117	63.4083	68.9627	protein_coding	ENSG00000137880	ensembl_havana	6	1	0.00115445	0.0450078	2.17489	1.12094	2.17489	94.2144	43.3193	1.36125	3.47485	0.00115407	0.0449929
GCNT2	GCNT2	1806.59	1770.04	1992.37	1325.93	1495.13	1364.77	6	10492223	10629369	+	9754.84	1992.37	1607.23	1625.81	protein_coding	ENSG00000111846	ensembl_havana	18	1	0.00234799	0.0679917	0.752032	-0.411135	-1.32973	1395.45	1855.58	-1.59771	-1.1067	0.00234738	0.067974
GCOM1	GCOM1	26.8526	31.8447	25.7933	6.47883	21.9041	10.7486	15	57591908	57714746	+	123.622	31.8447	17.9674	20.6037	protein_coding	ENSG00000137878	ensembl_havana	17	1	0.0852303	0.447194	0.465024	-1.10462	-2.15043	13.1184	28.2101	-5.14277	1.11211	0.0852272	0.447177
GDAP1	GDAP1	66.8761	94.19	47.5321	108.505	106.533	122.512	8	74321130	74488873	+	546.148	122.512	86.6754	91.0247	protein_coding	ENSG00000104381	ensembl_havana	13	1	0.0468874	0.343518	1.60704	0.684404	1.60704	112.563	70.0437	1.00655	2.56576	0.0468847	0.343498
GDF7	GDF7	8.59836	12.4649	2.64067	1.08505	0.918386	1.84893	2	20667144	20679244	+	27.5563	12.4649	2.83706	4.59272	protein_coding	ENSG00000143869	ensembl_havana	7	1	0.0462752	0.341388	0.16199	-2.62603	-6.17324	1.2955	7.99743	-36.9804	-1.03052	0.0462725	0.341368
GET1	GET1	319.417	394.777	380.419	594.909	532.891	402.143	21	39377698	39428529	+	2624.56	594.909	427.635	437.426	protein_coding	ENSG00000182093	ensembl_havana	16	1	0.0280187	0.269047	1.39697	0.482298	1.39697	509.584	364.779	1.03673	1.88238	0.0280164	0.269025
GET3	GET3	1715.84	2065.09	1930.32	3114.07	2615.57	1801.72	19	12737139	12748324	+	13242.6	3114.07	2155.78	2207.1	protein_coding	ENSG00000198356	ensembl_havana	12	1	0.0756531	0.426094	1.31841	0.398794	1.31841	2509.92	1903.76	-1.02896	1.78853	0.0756501	0.426077
GFM2	GFM2	342.979	398.975	368.374	515.398	484.908	609.99	5	74721206	74767148	-	2720.62	609.99	444.227	453.437	protein_coding	ENSG00000164347	ensembl_havana	18	1	0.00325943	0.0796032	1.45049	0.536543	1.45049	536.98	370.205	1.13219	1.85828	0.00325869	0.079585
GFOD1	GFOD1	204.45	192.823	236.34	125.866	134.084	176.486	6	13357830	13487663	-	1070.05	236.34	173.999	178.342	protein_coding	ENSG00000145990	ensembl_havana	11	1	0.0316395	0.283504	0.69127	-0.532679	-1.44661	145.741	210.831	-2.02583	-1.033	0.0316371	0.283483
GFPT2	GFPT2	1077.66	1554.13	1275.44	902.762	1051.55	1029.79	5	180300698	180353337	-	6891.34	1554.13	1130.57	1148.56	protein_coding	ENSG00000131459	ensembl_havana	13	1	0.0394669	0.317691	0.763754	-0.38882	-1.30932	994.927	1302.68	-1.69218	-1.01308	0.0394643	0.31767
GGA3	GGA3	850.281	781.067	983.649	775.812	684.2	639.975	17	75236599	75262364	-	4714.98	983.649	778.094	785.831	protein_coding	ENSG00000125447	ensembl_havana	18	1	0.0665671	0.400534	0.803413	-0.315786	-1.24469	699.634	870.827	-1.5726	1.01507	0.0665642	0.400516
GGH	GGH	597.108	764.181	726.184	964.604	837.568	807.895	8	63015079	63038807	-	4697.54	964.604	774.765	782.923	protein_coding	ENSG00000137563	ensembl_havana	12	1	0.0662533	0.399636	1.2501	0.322044	1.2501	869.681	695.689	-1.01509	1.58634	0.0662503	0.399618
GGT5	GGT5	685.957	725.972	652.246	1716.56	1246.25	1356.21	22	24219654	24245143	-	6383.19	1716.56	990.155	1063.87	protein_coding	ENSG00000099998	ensembl_havana	17	1	3.04305e-09	3.44839e-06	2.09065	1.06395	2.09065	1439.15	688.376	1.63839	2.66774	3.03314e-09	3.43715e-06
GIGYF1	GIGYF1	963.018	895.694	1080.04	871.295	769.607	514.038	7	100679507	100694038	-	5093.69	1080.04	827.517	848.948	protein_coding	ENSG00000146830	ensembl_havana	10	1	0.0523255	0.361787	0.733097	-0.447923	-1.36408	717.855	979.208	-1.86652	1.00313	0.0523227	0.361768
GIMAP2	GIMAP2	0	3.55434	2.64067	3.25515	2.75516	52.2604	7	150685697	150693642	+	64.4657	52.2604	0	10.7443	protein_coding	ENSG00000106560	ensembl_havana	11	1	0.0270064	0.263997	9.47481	3.2441	9.47481	19.4846	2.05647	1.29136	69.5172	0.0270041	0.263975
GIN1	GIN1	63.0546	68.4211	56.7745	83.5488	105.614	153.354	5	103086000	103120139	-	530.768	153.354	83.1898	88.4613	protein_coding	ENSG00000145723	ensembl_havana	17	1	0.0131965	0.182221	1.81945	0.863501	1.81945	114.435	62.8954	1.13339	2.9208	0.0131948	0.182198
GIPR	GIPR	45.8579	23.9918	36.9694	21.701	9.18386	8.56728	19	45668221	45683723	+	146.271	45.8579	20.2742	24.3785	protein_coding	ENSG00000010310	ensembl_havana	9	1	0.0200849	0.228275	0.365814	-1.45082	-2.73363	13.0082	35.5598	-6.38185	-1.17094	0.0200829	0.228253
GJB3	GJB3	47.7686	65.7553	62.0558	8.6804	25.7148	29.9855	1	34781214	34786370	+	239.96	65.7553	33.0558	39.9934	protein_coding	ENSG00000188910	ensembl_havana	8	1	0.0071918	0.127873	0.369986	-1.43446	-2.7028	21.6455	58.5036	-5.58072	-1.309	0.00719061	0.127851
GJC1	GJC1	19.1075	11.5516	26.4067	11.9356	2.75516	2.57018	17	44798448	44830817	-	74.3267	26.4067	8.88694	12.3878	protein_coding	ENSG00000182963	ensembl_havana	10	1	0.0511	0.358788	0.298241	-1.74545	-3.35299	5.64119	18.9149	-11.3078	1.0058	0.0510972	0.358769
GK5	GK5	154.77	195.489	161.081	105.25	139.595	132.793	3	142157527	142225593	-	888.977	195.489	145.553	148.163	protein_coding	ENSG00000175066	ensembl_havana	16	1	0.0859099	0.448633	0.738841	-0.436664	-1.35347	126.093	170.663	-1.9119	1.04368	0.0859068	0.448617
GLB1L	GLB1L	99.3588	139.508	99.0252	180.118	137.758	173.916	2	219236598	219245479	-	829.684	180.118	134.512	138.281	protein_coding	ENSG00000163521	ensembl_havana	16	1	0.0540777	0.366805	1.45037	0.536422	1.45037	163.854	112.974	-1.00654	2.11732	0.0540749	0.366786
GLCCI1	GLCCI1	339.157	294.121	286.513	261.497	240.617	83.9594	7	7968796	8094273	+	1505.86	339.157	230.757	250.977	protein_coding	ENSG00000106415	ensembl_havana	13	1	0.0994816	0.480549	0.636176	-0.652503	-1.57189	195.089	306.659	-2.69227	1.08961	0.0994785	0.480534
GLI2	GLI2	108.912	48.8722	72.6185	27.1262	38.5722	37.696	2	120735623	120992654	+	333.798	108.912	49.7956	55.6329	protein_coding	ENSG00000074047	ensembl_havana	21	1	0.00947381	0.15022	0.450016	-1.15195	-2.22214	34.5557	76.7878	-4.06196	-1.21565	0.00947243	0.150198
GLMP	GLMP	680.225	741.081	699.777	1029.71	1080.02	908.989	1	156290089	156295690	-	5139.8	1080.02	842.101	856.634	protein_coding	ENSG00000198715	ensembl_havana	13	1	0.000664917	0.0310553	1.42262	0.508549	1.42262	1006.03	707.17	1.16128	1.74278	0.000664656	0.0310431
GLT8D1	GLT8D1	1072.88	1159.6	1048.47	1470.24	1299.52	1232.83	3	52694488	52706033	-	7283.54	1470.24	1205.73	1213.92	protein_coding	ENSG00000016864	ensembl_havana	18	1	0.049396	0.352327	1.21905	0.285759	1.21905	1333.72	1094.06	1.00052	1.48531	0.0493932	0.352308
GLUD1	GLUD1	4234.91	4568.6	3641.99	5744.15	5173.08	4324.65	10	87050202	87094844	-	27687.4	5744.15	4565.43	4614.56	protein_coding	ENSG00000148672	ensembl_havana	9	1	0.0873723	0.452791	1.22433	0.291995	1.22433	5080.13	4149.31	-1.03011	1.54412	0.0873692	0.452775
GLUD2	GLUD2	617.188	734.009	628.294	867.733	809.478	745.554	X	121047610	121050095	+	4402.26	867.733	728.158	733.709	protein_coding	ENSG00000182890	havana	5	1	0.0720008	0.416072	1.22266	0.290018	1.22266	807.28	660.268	-1.01814	1.522	0.0719978	0.416054
GLUL	GLUL	2663.58	2635.53	2235.32	1851.11	2358.41	1844.53	1	182378098	182392207	-	13588.5	2663.58	2240.11	2264.75	protein_coding	ENSG00000135821	ensembl_havana	19	1	0.0619211	0.388103	0.803348	-0.315904	-1.24479	2018.15	2512.18	-1.56652	1.01098	0.0619182	0.388084
GMFB	GMFB	3431.6	3291.22	3178.08	3632.62	4045.57	3778.27	14	54474484	54489027	-	21357.4	4045.57	3547.47	3559.56	protein_coding	ENSG00000197045	ensembl_havana	13	1	0.0787924	0.431424	1.15704	0.210435	1.15704	3819.06	3300.73	-1.01692	1.36139	0.0787893	0.431407
GMFG	GMFG	55.4116	45.3178	39.6101	1.08505	16.5309	29.1288	19	39328353	39342373	-	187.084	55.4116	19.3178	31.1807	protein_coding	ENSG00000130755	ensembl_havana	13	1	0.051939	0.36098	0.335783	-1.5744	-2.97811	15.721	46.819	-8.95083	1.00921	0.0519362	0.360961
GNAI2	GNAI2	8777.18	9212.53	8956.03	11151.8	11511.3	10448	3	50226292	50259363	+	60056.9	11511.3	9951.59	10009.5	protein_coding	ENSG00000114353	ensembl_havana	17	1	0.00755939	0.133155	1.22877	0.297219	1.22877	11036.9	8982.02	1.05638	1.4293	0.00755816	0.133133
GNG12	GNG12	4739.61	4583.32	4066.63	6602.53	6152.27	6428.89	1	67701475	67833468	-	32573.2	6602.53	5335.48	5428.87	protein_coding	ENSG00000172380	ensembl_havana	6	1	3.88342e-05	0.00423143	1.43238	0.518417	1.43238	6394.41	4464.18	1.20703	1.69981	3.88031e-05	0.00422805
GNG7	GNG7	41.081	32.8777	34.3287	53.1675	72.5525	97.667	19	2511219	2702695	-	331.674	97.667	50.9379	55.2791	protein_coding	ENSG00000176533	ensembl_havana	13	1	0.00911431	0.14701	2.06691	1.04748	2.06691	74.667	36.125	1.19765	3.56709	0.00911296	0.146989
GNL3L	GNL3L	1163.64	1140.05	1115.68	900.592	828.385	749.636	X	54530183	54621522	+	5897.99	1163.64	968.983	982.999	protein_coding	ENSG00000130119	ensembl_havana	17	1	0.00124109	0.0464881	0.724362	-0.465218	-1.38053	825.747	1139.97	-1.67896	-1.13514	0.00124069	0.0464731
GOLGA2P7	GOLGA2P7	381.165	337.621	452.206	252.237	287.185	273.941	15	84199311	84230137	-	1984.35	452.206	323.905	330.726	transcribed_unprocessed_pseudogene	ENSG00000225151	havana	10	1	0.0090161	0.146516	0.696337	-0.522143	-1.43609	271.259	389.552	-1.88429	-1.09449	0.00901475	0.146494
GOLGA6L10	GOLGA6L10	49.2226	55.2389	63.9781	36.7914	29.0994	34.8789	15	82339993	82349476	-	269.209	63.9781	43.1955	44.8682	protein_coding	ENSG00000278662	ensembl_havana	5	1	0.0530857	0.363232	0.599348	-0.738534	-1.66848	33.5504	55.9781	-2.80285	1.00684	0.0530829	0.363213
GOLGA6L5P	GOLGA6L5P	87.9666	66.0502	89.7354	34.9224	38.0489	47.4545	15	84507885	84516815	-	364.178	89.7354	56.5996	60.6963	transcribed_unprocessed_pseudogene	ENSG00000230373	havana	8	1	0.00447005	0.0972879	0.496639	-1.00973	-2.01354	40.255	81.0548	-3.26221	-1.24282	0.00446914	0.0972682
GOLGA6L9	GOLGA6L9	72.7762	83.4986	86.3579	27.4198	30.5394	56.3709	15	82430018	82439154	+	356.963	86.3579	53.9914	59.4938	protein_coding	ENSG00000197978	ensembl_havana	9	1	0.00889896	0.146008	0.474016	-1.07699	-2.10963	38.3072	80.8142	-3.69077	-1.20586	0.00889763	0.145986
GOLGA7	GOLGA7	938.991	1173.82	1057.36	1082.48	1316.02	1614.08	8	41490396	41510981	+	7182.75	1614.08	1178.55	1197.12	protein_coding	ENSG00000147533	ensembl_havana	17	1	0.0904462	0.459586	1.26611	0.340406	1.26611	1338.04	1056.81	-1.0379	1.6638	0.0904431	0.45957
GOLGA7B	GOLGA7B	29.6166	35.5434	52.8134	13.0206	23.878	14.5644	10	97849843	97871581	+	169.436	52.8134	25.1281	28.2394	protein_coding	ENSG00000155265	ensembl_havana	11	1	0.0273087	0.265557	0.439851	-1.18491	-2.2735	17.1985	39.1009	-4.71468	-1.09632	0.0273065	0.265535
GOLGA8A	GOLGA8A	135.344	125.765	174.413	107.547	58.1581	58.0708	15	34379068	34437467	-	659.298	174.413	101.264	109.883	protein_coding	ENSG00000175265	ensembl_havana	17	1	0.00674874	0.123482	0.512779	-0.963591	-1.95016	74.2838	144.865	-3.1618	-1.20283	0.00674759	0.123461
GOLGA8B	GOLGA8B	1422.87	1398.15	1499.78	816.918	615.936	581.049	15	34525207	34588504	-	6334.7	1499.78	977.489	1055.78	protein_coding	ENSG00000215252	ensembl_havana	11	1	1.60163e-09	1.94461e-06	0.465752	-1.10237	-2.14706	670.695	1440.03	-2.75188	-1.67517	1.59604e-09	1.93782e-06
GOLGA8G	GOLGA8G	10.5091	1.07774	11.883	0	0.000141429	2.56487	15	28519611	28533015	-	26.0349	11.883	0	4.33915	protein_coding	ENSG00000183629	ensembl_havana	13	1	0.0767823	0.428619	0.114331	-3.12871	-8.74653	0.889165	7.77711	-96.594	1.26264	0.0767792	0.428602
GOLPH3L	GOLPH3L	443.293	505.605	485.884	546.865	553.787	693.95	1	150646230	150697155	-	3229.38	693.95	532.841	538.231	protein_coding	ENSG00000143457	ensembl_havana	11	1	0.0735161	0.420682	1.25157	0.323743	1.25157	598.546	478.235	-1.02159	1.60026	0.073513	0.420665
GOLT1B	GOLT1B	1268.74	1390.63	1448.41	1617.81	1689.83	2493.06	12	21501781	21518409	+	9908.49	2493.06	1610.02	1651.41	protein_coding	ENSG00000111711	ensembl_havana	10	1	0.0171448	0.210569	1.41269	0.498449	1.41269	1934.05	1369.05	1.06333	1.87685	0.0171429	0.210546
GPATCH2L	GPATCH2L	1307.91	1235.13	1291.29	946.163	1045.13	1175.44	14	76151916	76254343	+	7001.07	1307.91	1159.07	1166.84	protein_coding	ENSG00000089916	ensembl_havana	18	1	0.0644036	0.394954	0.826363	-0.275152	-1.21012	1056.08	1277.99	-1.48119	1.01147	0.0644006	0.394936
GPC3	GPC3	22.929	6.2201	14.5237	6.5103	0	5.14037	X	133535745	133985595	-	55.3234	22.929	0	9.22057	protein_coding	ENSG00000147257	ensembl_havana	15	1	0.0945479	0.469097	0.265049	-1.91567	-3.77289	3.85452	14.5427	-17.8944	1.2571	0.0945447	0.469081
GPC4	GPC4	13.3752	6.2201	6.60168	0	8.26547	153.354	X	133300103	133415490	-	187.817	153.354	0	31.3028	protein_coding	ENSG00000076716	ensembl_havana	9	1	0.0522974	0.361787	6.16614	2.62437	6.16614	53.9469	8.74889	-1.01824	38.7148	0.0522946	0.361768
GPKOW	GPKOW	361.131	477.17	433.07	264.752	330.619	270.726	X	49113407	49123736	-	2137.47	477.17	347.749	356.245	protein_coding	ENSG00000068394	ensembl_havana	11	1	0.00777537	0.135352	0.681462	-0.553294	-1.46743	288.802	423.798	-1.94628	-1.1064	0.00777413	0.13533
GPR161	GPR161	1000.28	879.701	1065.51	644.52	839.404	879.857	1	168079543	168137668	-	5309.27	1065.51	874.189	884.878	protein_coding	ENSG00000143147	ensembl_havana	14	1	0.0914693	0.46173	0.803423	-0.315769	-1.24467	788.42	981.326	-1.6049	1.03594	0.0914662	0.461715
GPR17	GPR17	75.4745	87.0814	81.8608	23.8711	59.6951	46.2633	2	127645864	127652640	+	374.246	87.0814	57.3203	62.3744	protein_coding	ENSG00000144230	ensembl_havana	16	1	0.0306759	0.280791	0.533543	-0.906325	-1.87426	43.4732	81.4804	-3.31323	-1.06026	0.0306735	0.280769
GPR173	GPR173	287.567	176.828	456.836	130.206	155.207	228.746	X	53048789	53080616	+	1435.39	456.836	218.018	239.232	protein_coding	ENSG00000184194	ensembl_havana	6	1	0.0292827	0.274364	0.559926	-0.836691	-1.78595	171.575	306.424	-3.00851	-1.0602	0.0292803	0.274342
GPR20	GPR20	6.68761	5.33151	14.5237	0	0	0	8	141356470	141367287	-	26.5428	14.5237	0	4.4238	protein_coding	ENSG00000204882	ensembl_havana	4	1	0.00161187	0.0545787	0.0198639	-5.65371	-50.3427	0.174496	8.7846	-574.942	-4.40807	0.00161139	0.0545626
GPR3	GPR3	64.9654	63.9781	69.9778	50.9974	46.8377	23.9884	1	27392622	27395815	+	320.745	69.9778	50.5401	53.4575	protein_coding	ENSG00000181773	ensembl_havana	7	1	0.0877165	0.453383	0.610336	-0.712324	-1.63844	40.4324	66.2461	-2.88773	1.07571	0.0877134	0.453367
GPR37	GPR37	70.6976	42.6521	52.8134	74.8685	115.717	105.167	7	124743885	124765793	-	461.915	115.717	72.4898	76.9858	protein_coding	ENSG00000170775	ensembl_havana	3	1	0.0216117	0.23487	1.78276	0.834116	1.78276	98.7453	55.3889	1.08857	2.91966	0.0216096	0.234848
GPR78	GPR78	54.29	21.3919	35.9803	4.08733	11.9619	8.56728	4	8558725	8619762	+	136.279	54.29	16.1133	22.7131	protein_coding	ENSG00000155269	ensembl_havana	12	1	0.00138593	0.0491819	0.222561	-2.16773	-4.49315	8.27945	37.2008	-11.2857	-1.78885	0.0013855	0.0491666
GPRASP1	GPRASP1	54.4563	50.6494	67.3372	35.8067	40.409	18.848	X	102651092	102659084	+	267.506	67.3372	41.441	44.5844	protein_coding	ENSG00000198932	ensembl_havana	13	1	0.0557695	0.370735	0.55107	-0.859693	-1.81465	31.5844	57.3146	-3.34167	1.01479	0.0557667	0.370716
GPRC5A	GPRC5A	1966.17	1813.6	2204.96	2842.85	2137.08	4242.51	12	12891559	12917938	+	15207.2	4242.51	2423.6	2534.53	protein_coding	ENSG00000013588	ensembl_havana	9	1	0.0147619	0.194213	1.54136	0.624206	1.54136	3074.4	1994.6	1.08857	2.1825	0.0147602	0.19419
GPRC5D-AS1	GPRC5D-AS1	37.2595	26.6576	33.0084	53.1675	37.6538	88.243	12	12927726	12984646	+	275.99	88.243	42.3776	45.9983	lncRNA	ENSG00000247498	havana	10	1	0.0612061	0.385534	1.85286	0.889757	1.85286	59.7913	32.2697	-1.0294	3.53405	0.0612032	0.385516
GPSM1	GPSM1	899.006	936.572	1039.1	794.255	754.914	541.453	9	136327476	136359606	+	4965.3	1039.1	810.768	827.55	protein_coding	ENSG00000160360	ensembl_havana	13	1	0.0214192	0.233961	0.727092	-0.45979	-1.37534	696.447	957.852	-1.80439	-1.04831	0.0214172	0.233939
GPSM2	GPSM2	1756.15	1404.68	1473.68	1219.88	1188.15	1285.33	1	108875350	108934546	+	8327.86	1756.15	1375.49	1387.98	protein_coding	ENSG00000121957	ensembl_havana	14	1	0.0314318	0.282687	0.796869	-0.327586	-1.25491	1231.2	1545.05	-1.54328	-1.02043	0.0314294	0.282665
GPT2	GPT2	475.774	410.528	431.75	340.705	369.191	247.594	16	46884362	46931290	+	2275.54	475.774	371.442	379.257	protein_coding	ENSG00000166123	ensembl_havana	14	1	0.0348271	0.298925	0.725868	-0.462221	-1.37766	318.923	439.368	-1.8551	-1.0231	0.0348247	0.298904
GPX3	GPX3	1641.34	1842.9	2039.91	2256.93	2763.4	1886.52	5	151020438	151028993	+	12431	2763.4	2042.47	2071.83	protein_coding	ENSG00000211445	ensembl_havana	12	1	0.0931287	0.466274	1.25058	0.322595	1.25058	2302.18	1840.89	-1.03811	1.62355	0.0931255	0.466259
GPX4	GPX4	1919.35	2326.32	2055.77	3392.94	3591.82	4920.21	19	1103926	1106792	+	18206.4	4920.21	2862.72	3034.4	protein_coding	ENSG00000167468	ensembl_havana	17	1	1.9954e-06	0.000458349	1.88931	0.917861	1.88931	3968.81	2100.66	1.45343	2.45592	1.99264e-06	0.000457714
GPX8	GPX8	1445.48	1473.28	1524.99	1713.29	1790.85	2325.16	5	55160167	55167298	+	10273.1	2325.16	1688.44	1712.18	protein_coding	ENSG00000164294	ensembl_havana	14	1	0.0213263	0.233911	1.3123	0.392094	1.3123	1943.61	1481.08	1.04123	1.65394	0.0213243	0.233889
GRB10	GRB10	3946.65	4227	3838.22	3191.12	3364.06	1982.48	7	50590063	50793463	-	20549.5	4227	3329.67	3424.92	protein_coding	ENSG00000106070	ensembl_havana	20	1	0.0255044	0.25622	0.710644	-0.492801	-1.40717	2845.52	4004.14	-1.89897	-1.04275	0.0255022	0.256198
GRB7	GRB7	58.2778	71.9754	40.9304	30.3814	33.0619	42.8364	17	39737927	39747292	+	277.463	71.9754	44.1313	46.2439	protein_coding	ENSG00000141738	ensembl_havana	14	1	0.0989601	0.479486	0.618989	-0.692015	-1.61554	35.5192	57.3826	-2.85615	1.09433	0.098957	0.479471
GREB1L	GREB1L	77.3852	55.9809	110.908	29.2964	22.9596	36.8393	18	21242242	21525418	+	333.37	110.908	47.785	55.5616	protein_coding	ENSG00000141449	ensembl_havana	14	1	0.000861282	0.0361483	0.367039	-1.446	-2.72451	29.7385	81.0228	-4.91255	-1.51102	0.00086097	0.0361352
GRHL3	GRHL3	0	0.888585	0	0	0	23.9884	1	24319357	24364483	+	24.877	23.9884	0	4.14616	protein_coding	ENSG00000158055	ensembl_havana	16	1	0.102977	0.487305	21.5446	4.42925	21.5446	8.01808	0.372162	-1.85924	863.001	0.102974	0.48729
GRHPR	GRHPR	1086.26	1233	1177.74	1686.92	1610.85	1296.23	9	37422666	37436991	+	8090.99	1686.92	1330.85	1348.5	protein_coding	ENSG00000137106	ensembl_havana	18	1	0.0171609	0.210614	1.31331	0.393208	1.31331	1530.88	1165.67	1.0496	1.64328	0.017159	0.210591
GRIA3	GRIA3	21.9736	27.5461	55.4541	5.42525	5.51032	0.856728	X	123184153	123490916	+	116.766	55.4541	9.75115	19.461	protein_coding	ENSG00000125675	ensembl_havana	18	1	0.000112751	0.00917002	0.111149	-3.16944	-8.99695	3.86702	34.7914	-27.4387	-2.95004	0.00011268	0.00916425
GRIK2	GRIK2	35.3488	18.6603	3.96101	67.2731	32.1435	133.65	6	101181257	102070084	+	291.036	133.65	30.1764	48.5061	protein_coding	ENSG00000164418	ensembl_havana	20	1	0.00798349	0.13763	3.97865	1.99228	3.97865	77.7465	19.5409	1.43427	11.0367	0.00798223	0.137608
GRIPAP1	GRIPAP1	756.656	857.484	815.968	493.697	617.155	375.247	X	48973720	49002265	-	3916.21	857.484	626.607	652.701	protein_coding	ENSG00000068400	ensembl_havana	13	1	0.00133636	0.048228	0.611359	-0.709908	-1.6357	495.23	810.048	-2.20935	-1.211	0.00133593	0.0482128
GSDMB	GSDMB	63.0546	87.9699	85.8218	23.8711	30.3067	27.4153	17	39904595	39919855	-	318.44	87.9699	45.9736	53.0733	protein_coding	ENSG00000073605	ensembl_havana	18	1	5.08138e-05	0.00508078	0.345613	-1.53277	-2.89341	27.2569	78.8652	-4.83722	-1.73071	5.07755e-05	0.00507695
GSDMC	GSDMC	69.7422	51.5379	109.588	19.5309	28.47	26.5586	8	129748196	129786625	-	305.427	109.588	42.4082	50.9046	protein_coding	ENSG00000147697	ensembl_havana	9	1	0.000369956	0.0219817	0.325821	-1.61785	-3.06917	24.934	76.5267	-5.68979	-1.65556	0.000369785	0.0219715
GSDMD	GSDMD	1054.73	1246.69	1192.26	1674.23	1370.23	1252.54	8	143553207	143563063	+	7790.69	1674.23	1285.13	1298.45	protein_coding	ENSG00000104518	ensembl_havana	11	1	0.0870827	0.452032	1.22953	0.298103	1.22953	1431.79	1164.5	-1.03052	1.55788	0.0870796	0.452016
GSKIP	GSKIP	452.848	585.576	516.253	636.928	686.032	595.428	14	96363452	96387289	+	3473.06	686.032	573.602	578.844	protein_coding	ENSG00000100744	ensembl_havana	15	1	0.0862509	0.449171	1.23348	0.302739	1.23348	639.408	518.376	-1.03035	1.56766	0.0862478	0.449155
GSN	GSN	10284.7	10943.3	10412.5	12982.1	10756.3	17803.4	9	121207794	121332844	+	73182.3	17803.4	11950.9	12197	protein_coding	ENSG00000148180	ensembl_havana	19	1	0.0552132	0.369915	1.31295	0.392815	1.31295	13847.6	10546.9	-1.00609	1.73435	0.0552104	0.369896
GSTCD	GSTCD	303.808	321.073	289.153	338.933	361.444	488.336	4	105708778	105847726	+	2102.75	488.336	345.038	350.458	protein_coding	ENSG00000138780	ensembl_havana	15	1	0.0797566	0.433596	1.30086	0.379468	1.30086	396.622	304.891	-1.0317	1.74588	0.0797536	0.433579
GSTK1	GSTK1	653.475	868.148	665.449	1204.41	1069	904.707	7	143244093	143270855	+	5365.18	1204.41	872.033	894.197	protein_coding	ENSG00000197448	ensembl_havana	14	1	0.00678357	0.123852	1.45159	0.537635	1.45159	1058.99	729.54	1.10835	1.90113	0.00678242	0.123831
GSTM1	GSTM1	307.207	308.707	270.966	399.614	409.568	370.388	1	109687814	109709040	+	2066.45	409.568	340.476	344.408	protein_coding	ENSG00000134184	ensembl_havana	13	1	0.0186874	0.219068	1.32749	0.408704	1.32749	393.09	296.115	1.04832	1.68101	0.0186855	0.219045
GSTO2	GSTO2	16.2413	15.1059	10.5627	19.5309	44.0825	38.5528	10	104268873	104304951	+	144.076	44.0825	21.0103	24.0127	protein_coding	ENSG00000065621	ensembl_havana	15	1	0.0287432	0.271583	2.42676	1.27903	2.42676	34.1721	14.0814	1.0964	5.37136	0.0287409	0.271561
GSTT2	GSTT2	1.35001	8.40569e-20	2.54987	4.80472	11.9623	15.0272	22	23980058	23983916	+	35.6941	15.0272	0.00250976	5.94902	polymorphic_pseudogene	ENSG00000099984	ensembl_havana	11	1	0.0185654	0.218538	8.76053	3.13102	8.76053	10.6413	1.21469	1.43821	53.3628	0.0185634	0.218516
GSTT2B	GSTT2B	281.44	287.901	237.751	377.133	421.516	274.547	22	23957414	23961187	-	1880.29	421.516	307.218	313.381	protein_coding	ENSG00000133433	ensembl_havana	10	1	0.0836017	0.443251	1.32709	0.408268	1.32709	357.534	269.412	-1.0383	1.82863	0.0835986	0.443234
GSTZ1	GSTZ1	381.194	449.624	450.235	949.42	736.544	500.33	14	77320996	77331598	+	3467.35	949.42	547.719	577.891	protein_coding	ENSG00000100577	ensembl_havana	19	1	0.00308123	0.0774787	1.70595	0.770572	1.70595	728.283	426.909	1.19769	2.42988	0.0030805	0.0774606
GTF2A2	GTF2A2	414.632	565.139	483.243	585.927	700.729	592.855	15	59638062	59657542	-	3342.52	700.729	549.609	557.087	protein_coding	ENSG00000140307	ensembl_havana	11	1	0.0621118	0.388709	1.28442	0.361118	1.28442	626.596	487.843	-1.01276	1.67078	0.0621089	0.38869
GTF2B	GTF2B	369.729	370.54	371.014	441.615	472.05	524.318	1	88852633	88891945	-	2549.27	524.318	420.846	424.878	protein_coding	ENSG00000137947	ensembl_havana	12	1	0.0239964	0.24861	1.2949	0.372837	1.2949	479.654	370.419	1.03462	1.62066	0.0239942	0.248588
GTF2H5	GTF2H5	348.711	496.718	444.953	553.376	610.726	532.027	6	158168350	158199345	+	2986.51	610.726	490.097	497.752	protein_coding	ENSG00000272047	ensembl_havana	3	1	0.0477743	0.34591	1.3145	0.394514	1.3145	565.375	430.106	1.00268	1.72328	0.0477716	0.34589
GTF2IP20	GTF2IP20	103.39	86.7977	95.0975	79.4118	55.6619	56.3869	1	223951394	223992595	-	476.746	103.39	77.2615	79.4576	transcribed_unprocessed_pseudogene	ENSG00000272645	havana	3	1	0.0668943	0.401328	0.669081	-0.579748	-1.49459	63.6069	95.0662	-2.29718	1.02837	0.0668913	0.40131
GTF3A	GTF3A	1532.44	1853.39	1594.96	2353.28	2353.82	2125.56	13	27424619	27435824	+	11813.4	2353.82	1940.16	1968.91	protein_coding	ENSG00000122034	ensembl_havana	16	1	0.00165672	0.0555441	1.37127	0.455515	1.37127	2277.34	1660.75	1.12639	1.66939	0.00165623	0.0555279
GTPBP6	GTPBP6	743.28	813.942	848.976	678.154	562.051	423.224	X	304529	318820	-	4069.63	848.976	660.267	678.271	protein_coding	ENSG00000178605	ensembl_havana	13	1	0.0132546	0.182715	0.690846	-0.533564	-1.4475	553.964	801.863	-1.93962	-1.08024	0.013253	0.182692
GTPBP8	GTPBP8	251.263	214.149	223.137	266.922	274.597	349.545	3	112990984	113015061	+	1579.61	349.545	259.816	263.269	protein_coding	ENSG00000163607	ensembl_havana	17	1	0.0821784	0.439129	1.29507	0.373026	1.29507	297.306	229.568	-1.03354	1.73345	0.0821753	0.439112
GUSBP11	GUSBP11	279.059	288.752	306.288	211.291	133.736	257.176	22	23638487	23717357	-	1476.3	306.288	237.475	246.05	lncRNA	ENSG00000228315	havana	12	1	0.0565046	0.373434	0.689384	-0.536621	-1.45057	200.785	291.254	-2.12595	1.01036	0.0565017	0.373415
GVINP2	GVINP2	21.9736	20.4375	33.0084	11.9356	15.6126	4.28364	11	6748131	6750325	+	107.251	33.0084	15.0955	17.8752	processed_pseudogene	ENSG00000254781	havana	1	1	0.0735537	0.420682	0.422142	-1.2442	-2.36887	10.5582	25.0109	-6.0924	1.08569	0.0735507	0.420665
GYG1	GYG1	236.909	231.921	231.408	334.409	421.228	322.431	3	148991408	149031776	+	1778.31	421.228	288.573	296.384	protein_coding	ENSG00000163754	ensembl_havana	18	1	0.00199891	0.0624584	1.53964	0.622592	1.53964	359.415	233.441	1.171	2.02432	0.00199836	0.0624413
GZMA	GZMA	0.955373	0	3.96101	0	15.6126	193.621	5	55102646	55110253	+	214.149	193.621	0	35.6916	protein_coding	ENSG00000145649	ensembl_havana	8	1	0.0337187	0.294407	43.6025	5.44634	43.6025	69.7644	1.60001	1.33724	1421.72	0.0337163	0.294386
H1-2	H1-2	830.219	902.803	963.845	519.739	743.893	284.434	6	26055740	26056471	-	4244.93	963.845	655.659	707.489	protein_coding	ENSG00000187837	havana	4	1	0.0123761	0.17487	0.573954	-0.800992	-1.7423	515.892	898.838	-2.69194	-1.12767	0.0123745	0.174848
H19	H19	248.397	76.4183	76.5795	60.7628	69.7973	23.1317	11	1995176	2001471	-	555.087	248.397	72.2809	92.5144	lncRNA	ENSG00000130600	havana	19	1	0.0182657	0.216169	0.381768	-1.38923	-2.61939	51.1456	133.97	-5.82752	-1.17738	0.0182638	0.216146
H2AC19	H2AC19	174.409	191.279	112.331	105.677	128.376	50.7474	1	149851061	149851625	+	762.82	191.279	117.112	127.137	protein_coding	ENSG00000272196	ensembl_havana	2	1	0.0640207	0.394166	0.593694	-0.752209	-1.68437	94.8017	159.681	-2.92463	1.03085	0.0640178	0.394148
H2AC6	H2AC6	1181.8	1254.67	1295.24	857.19	1033.18	725.65	6	26124145	26139117	+	6347.73	1295.24	1035.7	1057.96	protein_coding	ENSG00000180573	ensembl_havana	9	1	0.00463051	0.098757	0.701054	-0.512402	-1.42642	871.901	1243.7	-1.82394	-1.11554	0.00462958	0.0987373
H2BC11	H2BC11	47.7687	41.7635	36.9694	22.7861	26.6332	11.1375	6	27125897	27132796	-	187.058	47.7687	28.1585	31.1764	protein_coding	ENSG00000124635	ensembl_havana	9	1	0.0378218	0.311376	0.475868	-1.07137	-2.10142	20.104	42.247	-4.23531	-1.04266	0.0378192	0.311355
H2BC12	H2BC12	1072.88	991.653	1175.1	825.723	796.236	473.764	6	27146361	27146856	-	5335.35	1175.1	854.549	889.226	protein_coding	ENSG00000197903	ensembl_havana	8	1	0.00945582	0.150075	0.646715	-0.628797	-1.54628	698.181	1079.58	-2.14904	-1.11257	0.00945444	0.150053
H2BC15	H2BC15	90.7605	72.864	111.422	72.6072	38.5722	52.2604	6	27837760	27865799	+	438.486	111.422	68.9923	73.081	protein_coding	ENSG00000233822	ensembl_havana	4	1	0.048173	0.347704	0.59424	-0.750883	-1.68282	54.3016	91.38	-2.82007	-1.00419	0.0481702	0.347685
H2BC21	H2BC21	81.2067	81.7498	96.3845	39.0618	61.5319	59.1142	1	149884459	149886653	-	419.049	96.3845	67.0561	69.8415	protein_coding	ENSG00000184678	havana	10	1	0.0426008	0.329449	0.619384	-0.691094	-1.61451	53.4295	86.2624	-2.56531	-1.01611	0.0425982	0.329429
H2BC4	H2BC4	71.653	48.8722	62.0558	21.701	52.348	30.8422	6	26114873	26123927	-	287.472	71.653	44.3541	47.912	protein_coding	ENSG00000180596	ensembl_havana	7	1	0.0878161	0.453488	0.576779	-0.793908	-1.73376	35.0767	60.8148	-3.26131	1.08496	0.087813	0.453472
H3-3A	H3-3A	3027.75	3403.27	3180.47	3932.18	3798.98	3958.95	1	226061851	226073213	+	21301.6	3958.95	3531	3550.27	protein_coding	ENSG00000163041	ensembl_havana	12	1	0.0169929	0.209461	1.21617	0.282348	1.21617	3896.69	3204.06	1.03562	1.4282	0.0169911	0.209438
H3P16	H3P16	78.2291	98.1726	106.351	70.9008	38.0791	62.7452	4	139698144	139698555	-	454.478	106.351	71.9178	75.7463	processed_pseudogene	ENSG00000178458	havana	5	1	0.0491297	0.351328	0.607143	-0.719891	-1.64706	57.1306	94.0974	-2.70764	-1.0019	0.049127	0.351309
H3P4	H3P4	21.0182	13.3288	26.4067	9.76545	7.34709	11.1375	1	121118195	121118611	-	89.0037	26.4067	13.4467	14.834	unprocessed_pseudogene	ENSG00000213244	havana	3	1	0.1023	0.48559	0.468693	-1.09329	-2.13359	9.42217	20.1031	-5.29574	1.16333	0.102297	0.485575
H3P6	H3P6	792.834	787.516	824.47	920.565	778.675	1636.03	2	174719908	174720319	+	5740.09	1636.03	919.326	956.681	processed_pseudogene	ENSG00000235655	havana	3	1	0.0943357	0.468695	1.38745	0.472431	1.38745	1112.09	801.54	-1.05779	2.03625	0.0943326	0.46868
H4C8	H4C8	103.18	87.0814	121.471	48.8273	96.4305	59.1142	6	26277609	26285639	-	516.105	121.471	81.9899	86.0174	protein_coding	ENSG00000158406	ensembl_havana	4	1	0.103887	0.489431	0.658376	-0.603016	-1.51889	68.25	103.664	-2.5136	1.08954	0.103884	0.489416
HACD3	HACD3	2113.27	2251.68	2072.93	2686.58	2430.97	2583.03	15	65530418	65578350	+	14138.5	2686.58	2345.27	2356.41	protein_coding	ENSG00000074696	ensembl_havana	13	1	0.035557	0.30235	1.19576	0.257933	1.19576	2566.63	2146.44	1.01215	1.41269	0.0355545	0.302329
HAGLR	HAGLR	782.224	791.732	871.421	544.697	657.566	551.731	2	176164051	176188959	-	4199.37	871.421	688.642	699.895	lncRNA	ENSG00000224189	havana	8	1	0.00308128	0.0774787	0.71786	-0.478226	-1.39303	584.801	814.645	-1.735	-1.11847	0.00308056	0.0774606
HAPLN1	HAPLN1	0	0	0	0	0.918386	35.9826	5	83637805	83720856	-	36.901	35.9826	0	6.15016	protein_coding	ENSG00000145681	ensembl_havana	11	1	0.014281	0.190242	64.5208	6.01169	64.5208	12.3283	0.191075	2.30167	1808.66	0.0142793	0.190219
HAPLN3	HAPLN3	199.673	287.902	307.638	144.312	148.779	137.077	15	88877294	88895598	-	1225.38	307.638	193.227	204.23	protein_coding	ENSG00000140511	ensembl_havana	12	1	0.000444985	0.0244785	0.541641	-0.884592	-1.84624	143.362	264.681	-2.59957	-1.31122	0.000444789	0.0244677
HARBI1	HARBI1	39.9574	70.1982	56.7744	86.804	83.5731	112.418	11	46602861	46617910	-	449.726	112.418	71.1629	74.9543	protein_coding	ENSG00000180423	ensembl_havana	4	1	0.0339389	0.294935	1.69463	0.760972	1.69463	94.3597	55.6815	1.04081	2.75917	0.0339365	0.294914
HAS2	HAS2	1421.17	684.905	1340.8	1526	1340.86	4339.83	8	121612116	121641441	-	10653.6	4339.83	1504.32	1775.59	protein_coding	ENSG00000170961	ensembl_havana	7	1	0.102525	0.486142	2.09107	1.06424	2.09107	2402.35	1148.86	-1.15934	5.06929	0.102522	0.486127
HAS2-AS1	HAS2-AS1	32.911	36.6258	32.3501	50.5824	78.0461	119.44	8	121639293	121994186	+	349.956	119.44	51.3749	58.326	lncRNA	ENSG00000248690	havana	8	1	0.00346262	0.0820887	2.43811	1.28577	2.43811	82.925	34.0119	1.3414	4.43149	0.00346184	0.0820703
HASPIN	HASPIN	282.79	305.673	364.329	275.603	250.719	196.191	17	3723903	3726700	+	1675.31	364.329	274.406	279.218	protein_coding	ENSG00000177602	ensembl_havana	5	1	0.0804499	0.435461	0.758518	-0.398745	-1.31836	240.525	317.099	-1.79729	1.03407	0.0804468	0.435444
HAX1	HAX1	475.776	579.357	586.229	889.742	769.608	606.561	1	154272589	154275876	+	3907.27	889.742	637.486	651.212	protein_coding	ENSG00000143575	ensembl_havana	15	1	0.0254263	0.255737	1.38026	0.464945	1.38026	754.852	546.89	1.04044	1.83108	0.0254241	0.255715
HCCS	HCCS	553.16	581.134	672.048	394.958	580.421	405.232	X	11111301	11123087	+	3186.95	672.048	521.3	531.159	protein_coding	ENSG00000004961	ensembl_havana	15	1	0.0784153	0.430721	0.765112	-0.386256	-1.307	460.357	601.685	-1.76102	1.03089	0.0784122	0.430704
HCFC1	HCFC1	2994.21	2349.42	2475.66	2320.94	2148.12	2043.27	X	153947557	153971819	-	14331.6	2994.21	2370.45	2388.6	protein_coding	ENSG00000172534	ensembl_havana	14	1	0.0897506	0.459007	0.832674	-0.264177	-1.20095	2170.49	2606.65	-1.48385	1.02882	0.0897475	0.458991
HCFC2	HCFC2	370.684	403.417	524.174	617.394	609.806	1116.32	12	104064531	104106525	+	3641.79	1116.32	566.191	606.965	protein_coding	ENSG00000111727	ensembl_havana	12	1	0.00320663	0.0789991	1.80774	0.854188	1.80774	781.514	432.315	1.21937	2.68001	0.00320589	0.0789809
HCG11	HCG11	364.953	234.586	221.816	171.438	185.514	144.787	6	26521709	26527405	+	1323.09	364.953	210.681	220.516	lncRNA	ENSG00000228223	havana	3	1	0.0104372	0.15873	0.609807	-0.713576	-1.63986	167.173	274.141	-2.39443	-1.12309	0.0104358	0.158708
HCG27	HCG27	14.2778	7.99726	19.805	2.1701	4.59193	2.57018	6	31197760	31203969	+	51.4123	19.805	6.22018	8.56872	lncRNA	ENSG00000206344	havana	7	1	0.0213003	0.233911	0.224789	-2.15335	-4.44861	3.1272	13.9117	-15.8484	-1.24872	0.0212983	0.233889
HCG4B	HCG4B	39.6199	28.4347	44.2314	15.5412	22.1381	18.1482	6	29925983	29926974	-	168.114	44.2314	26.0311	28.0189	unprocessed_pseudogene	ENSG00000227262	havana	3	1	0.0426735	0.329861	0.500615	-0.998226	-1.99754	18.654	37.2622	-3.90004	-1.02311	0.0426709	0.329841
HDAC1	HDAC1	2411.38	2586.68	2462.43	3042.48	2879.1	2888.84	1	32292083	32333636	+	16270.9	3042.48	2701.45	2711.82	protein_coding	ENSG00000116478	ensembl_havana	12	1	0.0375544	0.311286	1.18074	0.239695	1.18074	2936.56	2487.05	1.00961	1.38088	0.0375519	0.311265
HDAC6	HDAC6	2127.61	2065.96	2058.4	1215.26	1316.05	807.038	X	48801377	48824983	+	9590.31	2127.61	1506.25	1598.38	protein_coding	ENSG00000094631	ensembl_havana	21	1	1.67086e-05	0.00216803	0.533795	-0.905642	-1.87338	1112.44	2084.03	-2.49313	-1.40769	1.66927e-05	0.00216597
HDAC9	HDAC9	885.63	1123.17	913.673	656.456	717.258	364.11	7	18086949	19002417	+	4660.3	1123.17	733.557	776.717	protein_coding	ENSG00000048052	ensembl_havana	21	1	0.00614621	0.117518	0.594233	-0.7509	-1.68284	578.998	974.362	-2.44198	-1.1597	0.00614512	0.117497
HDX	HDX	58.2778	81.7499	64.6965	24.9562	63.3686	11.1375	X	84317874	84502480	-	304.186	81.7499	41.9229	50.6977	protein_coding	ENSG00000165259	ensembl_havana	14	1	0.0904562	0.459586	0.485537	-1.04235	-2.05958	33.1532	68.2815	-4.75375	1.12068	0.0904531	0.45957
HEBP1	HEBP1	572.268	643.335	561.144	735.663	757.667	841.307	12	12974870	13000266	-	4111.38	841.307	677.699	685.231	protein_coding	ENSG00000013583	ensembl_havana	10	1	0.0113396	0.166596	1.31342	0.393331	1.31342	778.487	592.716	1.06354	1.62202	0.0113381	0.166573
HECTD3	HECTD3	1078.93	923.178	1002.69	1366.32	1216.8	1301.31	1	45002540	45011325	-	6889.23	1366.32	1137.02	1148.2	protein_coding	ENSG00000126107	ensembl_havana	15	1	0.00960329	0.151128	1.29271	0.370396	1.29271	1294.61	1001.47	1.06443	1.56994	0.0096019	0.151106
HELZ2	HELZ2	1543.88	1239.58	1568.56	1149.07	1073.59	707.657	20	63558086	63574240	-	7282.34	1568.56	1174.17	1213.72	protein_coding	ENSG00000130589	ensembl_havana	16	1	0.0119911	0.172542	0.673203	-0.570887	-1.48544	976.358	1450.32	-2.02264	-1.09091	0.0119895	0.17252
HERC2	HERC2	1360.36	891.133	1069.61	656.028	893.819	983.421	15	28111040	28322180	-	5854.37	1360.36	952.698	975.728	protein_coding	ENSG00000128731	ensembl_havana	18	1	0.096977	0.475546	0.763141	-0.389978	-1.31037	844.818	1107.03	-1.80314	1.05012	0.0969738	0.47553
HERC2P2	HERC2P2	1390.13	1322.77	1211.16	667.83	600.412	972.745	15	22495570	22590816	+	6165.04	1390.13	976.807	1027.51	transcribed_unprocessed_pseudogene	ENSG00000276550	havana	4	1	0.000239081	0.0158746	0.571237	-0.807839	-1.75059	747.34	1308.28	-2.36006	-1.29851	0.000238956	0.0158663
HERC4	HERC4	1625.08	1711.41	1625.34	1361.73	1579.62	1213.98	10	67921899	68075349	-	9117.16	1711.41	1508.94	1519.53	protein_coding	ENSG00000148634	ensembl_havana	15	1	0.0997052	0.480644	0.83732	-0.256149	-1.19429	1385.02	1654.11	-1.4754	1.03441	0.0997021	0.480629
HERC5	HERC5	813.978	661.108	825.213	397.129	570.318	435.218	4	88457119	88506164	+	3702.96	825.213	593.655	617.161	protein_coding	ENSG00000138646	ensembl_havana	9	1	0.000672794	0.0311231	0.61037	-0.712245	-1.63835	467.77	766.372	-2.17764	-1.23262	0.000672531	0.0311109
HERC6	HERC6	466.224	331.442	466.079	289.708	238.781	358.968	4	88378739	88443098	+	2151.2	466.224	348.401	358.534	protein_coding	ENSG00000138642	ensembl_havana	15	1	0.0405043	0.320748	0.70321	-0.507972	-1.42205	295.944	420.846	-1.99166	-1.01535	0.0405017	0.320727
HES1	HES1	343.934	334.997	392.14	1027.54	708.995	628.839	3	194136148	194138733	+	3436.45	1027.54	523.991	572.742	protein_coding	ENSG00000114315	ensembl_havana	4	1	1.14701e-06	0.000309474	2.20893	1.14335	2.20893	787.921	356.698	1.60515	3.03982	1.14527e-06	0.000309005
HEXA	HEXA	1044.15	1190.09	1116.88	1383.9	1513.05	1373.65	15	72340924	72376421	-	7621.7	1513.05	1259.49	1270.28	protein_coding	ENSG00000213614	ensembl_havana	10	1	0.0106007	0.16017	1.27431	0.349715	1.27431	1423.59	1117.15	1.05812	1.53466	0.0105993	0.160148
HEXD	HEXD	387.355	458.947	446.273	376.512	287.344	255.305	17	82418318	82442646	+	2211.74	458.947	360.401	368.623	protein_coding	ENSG00000169660	ensembl_havana	16	1	0.0244751	0.250619	0.710179	-0.493746	-1.4081	305.928	430.776	-1.89727	-1.04505	0.0244729	0.250597
HFE	HFE	392.658	417.635	454.195	443.785	526.236	770.197	6	26087281	26098344	+	3004.71	770.197	487.343	500.784	protein_coding	ENSG00000010704	ensembl_havana	18	1	0.0605157	0.384397	1.37801	0.462588	1.37801	580.529	421.28	-1.01427	1.92601	0.0605128	0.384378
HHEX	HHEX	110.823	143.951	128.073	96.5695	83.5731	89.9564	10	92689955	92695648	+	652.946	143.951	106.792	108.824	protein_coding	ENSG00000152804	ensembl_havana	11	1	0.0582504	0.377615	0.704628	-0.505066	-1.41919	89.9573	127.666	-2.03888	1.0123	0.0582475	0.377597
HIBADH	HIBADH	812.063	1008.55	720.902	1136.04	1031.35	974.961	7	27525442	27662884	-	5683.87	1136.04	936.466	947.312	protein_coding	ENSG00000106049	ensembl_havana	9	1	0.0992666	0.479901	1.2348	0.304277	1.2348	1047.2	848.073	-1.04067	1.58674	0.0992634	0.479886
HIC1	HIC1	409.449	364.356	512.521	346.256	257.906	91.8662	17	2054154	2063242	+	1982.35	512.521	292.578	330.392	protein_coding	ENSG00000177374	ensembl_havana	13	1	0.034874	0.298935	0.540644	-0.887249	-1.84965	231.699	428.561	-3.27496	-1.04465	0.0348715	0.298914
HIF1A-AS3	HIF1A-AS3	77.3852	39.9863	44.8914	33.6366	38.5722	14.5644	14	61707564	61751100	-	249.036	77.3852	37.1408	41.506	lncRNA	ENSG00000258667	havana	2	1	0.0905924	0.459586	0.532397	-0.909426	-1.8783	28.8342	54.1592	-3.89792	1.10485	0.0905892	0.45957
HIKESHI	HIKESHI	302.811	367.874	440.992	514.314	528.07	482.337	11	86302211	86345944	+	2636.4	528.07	431.283	439.4	protein_coding	ENSG00000149196	ensembl_havana	16	1	0.0228853	0.242976	1.37425	0.458647	1.37425	508.181	369.787	1.04505	1.80716	0.0228832	0.242954
HINT1	HINT1	1715.85	2507.6	2197.03	3011.03	3190.45	2079.29	5	131159027	131171736	-	14701.3	3190.45	2395.21	2450.21	protein_coding	ENSG00000169567	ensembl_havana	12	1	0.105705	0.49295	1.28961	0.36693	1.28961	2759.98	2140.18	-1.05527	1.75499	0.105702	0.492935
HINT2	HINT2	304.097	368.763	286.512	594.496	446.97	342.691	9	35812960	35815355	-	2343.53	594.496	378.186	390.588	protein_coding	ENSG00000137133	ensembl_havana	11	1	0.0410265	0.322557	1.43987	0.525942	1.43987	460.934	320.121	1.01497	2.04265	0.0410239	0.322537
HIP1	HIP1	277.058	188.38	217.856	241.967	244.291	659.678	7	75533298	75738963	-	1829.23	659.678	276.139	304.871	protein_coding	ENSG00000127946	ensembl_havana	17	1	0.0685189	0.406635	1.67828	0.746986	1.67828	382.272	227.776	-1.04012	2.92964	0.0685159	0.406617
HIPK2	HIPK2	1573.51	1278.68	1181.7	1549.45	1816.57	1745.15	7	139561570	139777999	-	9145.05	1816.57	1506.26	1524.18	protein_coding	ENSG00000064393	ensembl_havana	16	1	0.0461895	0.341212	1.26665	0.341022	1.26665	1703.99	1345.27	1.004	1.59801	0.0461868	0.341192
HIVEP3	HIVEP3	1280.19	964.114	1275.44	943.995	1082.77	732.504	1	41506365	42035926	-	6279.02	1280.19	1027.77	1046.5	protein_coding	ENSG00000127124	havana	16	1	0.100571	0.482677	0.784091	-0.350907	-1.27536	919.586	1172.81	-1.70497	1.04821	0.100568	0.482662
HK1	HK1	3917.88	3721.39	4033.51	3239.96	3449.51	2074.13	10	69269984	69401885	+	20436.4	4033.51	3329.88	3406.06	protein_coding	ENSG00000156515	ensembl_havana	23	1	0.0532979	0.363401	0.75071	-0.413672	-1.33207	2920.84	3890.76	-1.78166	1.00408	0.0532951	0.363382
HLA-DMA	HLA-DMA	158.592	154.614	116.19	132.376	303.067	271.583	6	32948613	32969095	-	1136.42	303.067	177.279	189.404	protein_coding	ENSG00000204257	ensembl_havana	15	1	0.0415314	0.324844	1.64566	0.718669	1.64566	235.986	143.399	1.0193	2.65692	0.0415287	0.324823
HLA-DMB	HLA-DMB	13.3752	20.4357	21.1254	19.5309	101.022	67.6815	6	32934629	32941029	-	243.171	101.022	30.282	40.5285	protein_coding	ENSG00000242574	ensembl_havana	9	1	0.00576917	0.11323	3.4432	1.78375	3.4432	62.8865	18.264	1.43132	8.28298	0.00576812	0.11321
HLA-DPA1	HLA-DPA1	19.1075	39.0978	26.4067	8.6804	209.392	301.569	6	33064569	33080776	-	604.253	301.569	47.0247	100.709	protein_coding	ENSG00000231389	ensembl_havana	7	1	0.00194094	0.061151	6.13956	2.61814	6.13956	173.35	28.2349	1.94853	19.345	0.00194041	0.0611341
HLA-DPB1	HLA-DPB1	3.82149	4.44293	1.32034	3.25515	30.3067	64.2546	6	33075990	33089697	+	107.401	64.2546	7.22382	17.9002	protein_coding	ENSG00000223865	ensembl_havana	11	1	0.00208641	0.0639825	9.99776	3.3216	9.99776	32.7057	3.27131	2.30747	43.3181	0.00208584	0.0639652
HLA-DRA	HLA-DRA	69.7422	54.2037	77.8998	44.4871	367.355	1141.15	6	32439878	32445047	+	1754.84	1141.15	132.827	292.474	protein_coding	ENSG00000204287	ensembl_havana	14	1	0.00701359	0.125702	7.69839	2.94456	7.69839	517.753	67.2547	1.74602	33.943	0.00701242	0.125681
HLA-DRB1	HLA-DRB1	52.5455	58.5616	44.8428	21.3124	332.848	590.95	6	32578769	32589849	-	1101.06	590.95	91.2806	183.51	protein_coding	ENSG00000196126	ensembl_havana	11	1	0.0169782	0.209431	6.05931	2.59915	6.05931	315.119	52.0058	1.38047	26.5961	0.0169764	0.209408
HLA-DRB5	HLA-DRB5	1.91075	6.30516	11.9316	4.72884	56.5473	57.5928	6	32517353	32530288	-	139.017	57.5928	11.4162	23.1694	protein_coding	ENSG00000198502	ensembl_havana	6	1	0.00839078	0.140258	6.02463	2.59087	6.02463	39.7152	6.59213	1.58494	22.9008	0.00838948	0.140236
HLF	HLF	0	0.888585	0	2.1701	0	16.2778	17	55264960	55325188	+	19.3365	16.2778	0	3.22275	protein_coding	ENSG00000108924	ensembl_havana	14	1	0.0865847	0.450357	16.5834	4.05167	16.5834	6.17168	0.37216	-1.49719	411.741	0.0865816	0.450341
HMBOX1	HMBOX1	192.985	157.28	155.8	62.9329	123.064	137.933	8	28890395	29064765	+	829.995	192.985	130.991	138.332	protein_coding	ENSG00000147421	ensembl_havana	18	1	0.064569	0.395369	0.64169	-0.640052	-1.55839	108.303	168.778	-2.49458	1.02718	0.064566	0.39535
HMCN1	HMCN1	204.45	127.068	155.8	50.9974	90.9202	93.3833	1	185734391	186190950	+	722.618	204.45	109.802	120.436	protein_coding	ENSG00000143341	ensembl_havana	12	1	0.00287651	0.0749923	0.484404	-1.04572	-2.06439	78.6859	162.439	-3.32496	-1.28174	0.00287582	0.0749743
HMG20B	HMG20B	2264.25	2292.56	2204.97	2836.3	2528.33	2577.9	19	3572777	3579089	+	14704.3	2836.3	2441.09	2450.72	protein_coding	ENSG00000064961	ensembl_havana	19	1	0.0571482	0.375349	1.17429	0.231788	1.17429	2647.09	2254.21	-1.00489	1.3857	0.0571453	0.375331
HMGB1P6	HMGB1P6	599.795	562.634	507.355	567.474	654.591	958.145	15	71164770	71165416	-	3849.99	958.145	627.309	641.666	processed_pseudogene	ENSG00000259781	havana	1	1	0.105001	0.491549	1.30589	0.385033	1.30589	727.2	556.861	-1.05738	1.8032	0.104998	0.491534
HMGCL	HMGCL	248.397	228.366	253.505	341.791	382.967	310.136	1	23801885	23838621	-	1765.16	382.967	289.095	294.194	protein_coding	ENSG00000117305	ensembl_havana	15	1	0.00833568	0.139734	1.41825	0.504113	1.41825	344.902	243.188	1.09399	1.83863	0.00833439	0.139712
HMGCS1	HMGCS1	987.856	1005.88	974.404	846.334	856.854	574.008	5	43287470	43313513	-	5245.34	1005.88	859.457	874.223	protein_coding	ENSG00000112972	ensembl_havana	15	1	0.0575622	0.376324	0.766763	-0.383147	-1.30418	758.678	989.455	-1.71545	1.00856	0.0575593	0.376305
HMGN1P38	HMGN1P38	60.1731	71.0868	80.5405	105.25	125.819	83.6654	15	92711808	92712111	+	526.535	125.819	85.17	87.7558	processed_pseudogene	ENSG00000253954	havana	3	1	0.0708301	0.413026	1.48968	0.575004	1.48968	104.848	70.3831	-1.03442	2.29554	0.0708271	0.413008
HMGN2	HMGN2	3164.17	3529.4	3086.93	6857.25	5283.39	5063.53	1	26472440	26476643	+	26984.7	6857.25	4300.32	4497.45	protein_coding	ENSG00000198830	ensembl_havana	11	1	1.7436e-06	0.000411636	1.75862	0.814443	1.75862	5734.09	3260.56	1.39531	2.21653	1.74113e-06	0.000411052
HMGN2P4	HMGN2P4	57.3224	42.6521	40.9304	127.321	115.792	91.6289	5	76242024	76242405	-	475.647	127.321	71.6397	79.2746	processed_pseudogene	ENSG00000249014	havana	2	1	0.000186059	0.0133609	2.36486	1.24175	2.36486	111.423	47.1161	1.50581	3.71398	0.000185955	0.0133535
HMGN2P5	HMGN2P5	84.0728	113.725	116.19	219.149	180.633	311.559	15	29730713	29730986	+	1025.33	311.559	154.689	170.888	processed_pseudogene	ENSG00000234664	ensembl_havana	1	1	0.000103	0.0086246	2.27055	1.18304	2.27055	237.281	104.504	1.50105	3.43452	0.000102934	0.00861906
HNF4G	HNF4G	9.55373	5.33151	11.883	17.3608	12.8574	41.9797	8	75407914	75566835	+	98.9661	41.9797	13.3542	16.4944	protein_coding	ENSG00000164749	ensembl_havana	13	1	0.0580942	0.377614	2.73841	1.45334	2.73841	24.1459	8.81748	-1.03515	7.76246	0.0580913	0.377596
HNMT	HNMT	207.316	216.815	191.449	420.999	302.149	309.279	2	137964020	138016365	+	1648.01	420.999	264	274.668	protein_coding	ENSG00000150540	ensembl_havana	14	1	0.000928936	0.0385123	1.67314	0.742556	1.67314	343.731	205.441	1.23373	2.26904	0.000928607	0.0384987
HNRNPA1	HNRNPA1	5799.33	6207.9	5588.23	6971.21	6747.16	7450.3	12	54280193	54287089	+	38764.1	7450.3	6427.37	6460.69	protein_coding	ENSG00000135486	ensembl_havana	18	1	0.0259437	0.258307	1.20297	0.266596	1.20297	7056.4	5865.83	1.02241	1.41541	0.0259415	0.258284
HNRNPA1L2	HNRNPA1L2	1110.02	1077.96	1233.07	1531.55	1383.15	1341.25	13	52642425	52643797	+	7677.01	1531.55	1269.81	1279.5	protein_coding	ENSG00000139675	ensembl_havana	12	1	0.0263709	0.261372	1.24453	0.315603	1.24453	1418.27	1139.6	1.02602	1.50958	0.0263687	0.26135
HNRNPA1P16	HNRNPA1P16	9.55373	11.5516	19.805	5.42525	2.75516	2.57018	17	2306761	2307716	+	51.661	19.805	6.61739	8.61016	processed_pseudogene	ENSG00000262333	havana	1	1	0.033134	0.291367	0.261389	-1.93573	-3.82572	3.53431	13.5213	-13.146	-1.11335	0.0331316	0.291345
HNRNPA1P48	HNRNPA1P48	4191.67	4613.09	4519.72	5733.01	5126.38	5477.88	16	51553436	51647133	+	29661.8	5733.01	4913.41	4943.63	protein_coding	ENSG00000224578	havana	5	1	0.015449	0.199092	1.22608	0.294056	1.22608	5445.49	4441.38	1.03963	1.44598	0.0154472	0.199069
HNRNPA3P6	HNRNPA3P6	1355.49	1296.82	1560.85	1166.53	1093.49	1183.87	3	75214631	75215637	+	7657.05	1560.85	1267.34	1276.18	processed_pseudogene	ENSG00000213300	havana	5	1	0.0453739	0.338019	0.817988	-0.289848	-1.22251	1147.95	1403.38	-1.48836	-1.00415	0.0453712	0.337999
HNRNPC	HNRNPC	6718.77	7872.61	7432.24	9012.92	9007.24	8682.19	14	21209136	21269495	-	48726	9012.92	8074.25	8120.99	protein_coding	ENSG00000092199	ensembl_havana	17	1	0.0236959	0.24741	1.21242	0.277895	1.21242	8900.67	7341.22	1.02606	1.43264	0.0236938	0.247387
HNRNPCL1	HNRNPCL1	0	0.888585	0	0	6.4287	10.2807	1	12847377	12848721	-	17.598	10.2807	0	2.933	protein_coding	ENSG00000179172	ensembl_havana	10	1	0.0855585	0.447987	15.0353	3.91028	15.0353	5.59552	0.37216	-1.46139	330.362	0.0855555	0.44797
HNRNPDL	HNRNPDL	3825.31	3785.37	3782.76	2831.98	2700.05	3517.71	4	82422564	82430409	-	20443.2	3825.31	3373.27	3407.2	protein_coding	ENSG00000152795	ensembl_havana	17	1	0.0299869	0.277438	0.794395	-0.332072	-1.25882	3016.98	3797.84	-1.54967	-1.02255	0.0299846	0.277416
[truncated: 2,184 more rows]
