# Supplementary material for: Focal Adhesion Kinase Provides a Collateral Vulnerability That Can Be Leveraged to Improve mTORC1 Inhibitor Efficacy
Source: Cancers (Basel). 2022 Jul 11;14(14):3374. doi: 10.3390/cancers14143374 (PMC9323520; doi:10.3390/cancers14143374)
Supplement: Supplementary file 1 [file cancers-14-03374-s001.zip › Supplementary Table S2.xlsx]

## Sheet: Sheet1
	S6 pS235/236 (RPPA, PanCancer Atlas)
	Reactome Pathways of the Top 10% of All DEG
		p-value	q-value
	Immune System	1.1e-32	1.36e-29
	Cell Cycle	2.09e-27	1.3e-24
	Cell Cycle, Mitotic	5.77e-25	2.39e-22
	Innate Immune System	1.44e-22	4.47e-20
	Cell Cycle Checkpoints	2.81e-21	6.99e-19
	Reactome Pathways of the Bottom 10% of All DEG
		p-value	q-value
	Peptide chain elongation	8.46e-05	0.0435
	Selenocysteine synthesis	0.000138	0.0435
	Eukaryotic Translation Elongation	0.000161	0.0435
	Nonsense Mediated Decay (NMD) independent of the Exon Junction Complex (EJC)	0.000188	0.0435
	Carboxyterminal post-translational modifications of tubulin	0.000245	0.0453
