# Supplementary material for: Focal Adhesion Kinase Provides a Collateral Vulnerability That Can Be Leveraged to Improve mTORC1 Inhibitor Efficacy
Source: Cancers (Basel). 2022 Jul 11;14(14):3374. doi: 10.3390/cancers14143374 (PMC9323520; doi:10.3390/cancers14143374)
Supplement: Supplementary file 1 [file cancers-14-03374-s001.zip › Supplementary Table S3.xlsx]

## Sheet: Sheet1
	4E-BP1 (RPPA, PanCancer Atlas)
	Reactome Pathways of the Top 10% of All DEG
		p-value	q-value
	Cell Cycle	4.95e-75	5.22e-72
	Cell Cycle, Mitotic	6.92e-69	3.65e-66
	Cell Cycle Checkpoints	3.89e-46	1.37e-43
	M Phase	4.79e-39	1.26e-36
	Metabolism of RNA	9.4e-32	1.98e-29
	Reactome Pathways of the Bottom 10% of All DEG
		p-value	q-value
	Extracellular matrix organization	3.3e-16	2.93e-13
	Molecules associated with elastic fibres	2.58e-07	0.000113
	Elastic fibre formation	3.83e-07	0.000113
	Collagen biosynthesis and modifying enzymes	1.04e-06	0.00023
	Collagen chain trimerization	2.22e-06	0.000347
