# Supplementary material for: Focal Adhesion Kinase Provides a Collateral Vulnerability That Can Be Leveraged to Improve mTORC1 Inhibitor Efficacy
Source: Cancers (Basel). 2022 Jul 11;14(14):3374. doi: 10.3390/cancers14143374 (PMC9323520; doi:10.3390/cancers14143374)
Supplement: Supplementary file 1 [file cancers-14-03374-s001.zip › Supplementary Table S4.xlsx]

## Sheet: Sheet1
	4E-BP1 pS65 (RPPA, PanCancer Atlas)
	Reactome Pathways of the Top 10% of All DEG
		p-value	q-value
	Cell Cycle	2.24e-54	2.66e-51
	Cell Cycle, Mitotic	1.76e-49	1.04e-46
	Cell Cycle Checkpoints	7.71e-33	3.05e-30
	M Phase	1.18e-30	3.5e-28
	Mitotic Prometaphase	2.44e-25	5.79e-23
	Reactome Pathways of the Bottom 10% of All DEG
		p-value	q-value
	Regulation of Insulin-like Growth Factor (IGF) transport and uptake by Insulin-like Growth Factor Binding Proteins (IGFBPs)	0.000231	0.114
	Fatty acids	0.000238	0.114
	Serotonin clearance from the synaptic cleft	0.000884	0.146
	Metabolism of Angiotensinogen to Angiotensins	0.000911	0.146
	Signaling by Hedgehog	0.00114	0.146
