# Supplementary material for: Focal Adhesion Kinase Provides a Collateral Vulnerability That Can Be Leveraged to Improve mTORC1 Inhibitor Efficacy
Source: Cancers (Basel). 2022 Jul 11;14(14):3374. doi: 10.3390/cancers14143374 (PMC9323520; doi:10.3390/cancers14143374)
Supplement: Supplementary file 1 [file cancers-14-03374-s001.zip › Supplementary Table S5.xlsx]

## Sheet: Sheet1
	p70S6K (RPPA, PanCancer Atlas)
	Reactome Pathways of the Top 10% of All DEG
		p-value	q-value
	Signal Transduction	7.08e-11	8.47e-08
	Signaling by Rho GTPases	7.54e-08	4.48e-05
	Separation of Sister Chromatids	1.22e-07	4.48e-05
	Cell Cycle Checkpoints	1.78e-07	4.48e-05
	Resolution of Sister Chromatid Cohesion	1.87e-07	4.48e-05
	Reactome Pathways of the Bottom 10% of All DEG
		p-value	q-value
	Signal Transduction	1.64e-12	1.22e-09
	Muscle contraction	2.63e-12	1.22e-09
	Extracellular matrix organization	3.68e-12	1.22e-09
	Developmental Biology	3.01e-08	7.47e-06
	Signaling by GPCR	6.75e-08	1.27e-05
