# Supplementary material for: Focal Adhesion Kinase Provides a Collateral Vulnerability That Can Be Leveraged to Improve mTORC1 Inhibitor Efficacy
Source: Cancers (Basel). 2022 Jul 11;14(14):3374. doi: 10.3390/cancers14143374 (PMC9323520; doi:10.3390/cancers14143374)
Supplement: Supplementary file 1 [file cancers-14-03374-s001.zip › Supplementary Table S6.xlsx]

## Sheet: Sheet1
	p70S6K T389 (RPPA, PanCancer Atlas)
	Reactome Pathways of the Top 10% of All DEG
		p-value	q-value
	Signal Transduction	1.27e-05	0.0138
	SUMOylation of intracellular receptors	4.57e-05	0.0184
	Voltage gated Potassium channels	5.09e-05	0.0184
	Signaling by GPCR	0.000115	0.0311
	Cardiac conduction	0.000272	0.059
	Reactome Pathways of the Bottom 10% of All DEG
		p-value	q-value
	Cell Cycle	2.35e-15	2.53e-12
	Cell Cycle, Mitotic	2.46e-12	1.32e-09
	Metabolism of RNA	5.93e-12	2.13e-09
	Processing of Capped Intron-Containing Pre-mRNA	9.78e-12	2.63e-09
	mRNA Splicing	1.62e-11	3.49e-09
